# Supplementary material for: New Insights into the Genetic Basis of Lysine Accumulation in Rice Revealed by Multi-Model GWAS
Source: MDPI journal article supplement (doi:10.3390/ijms25094667), 2024-04-25
Supplement: s1 [file s1]

A

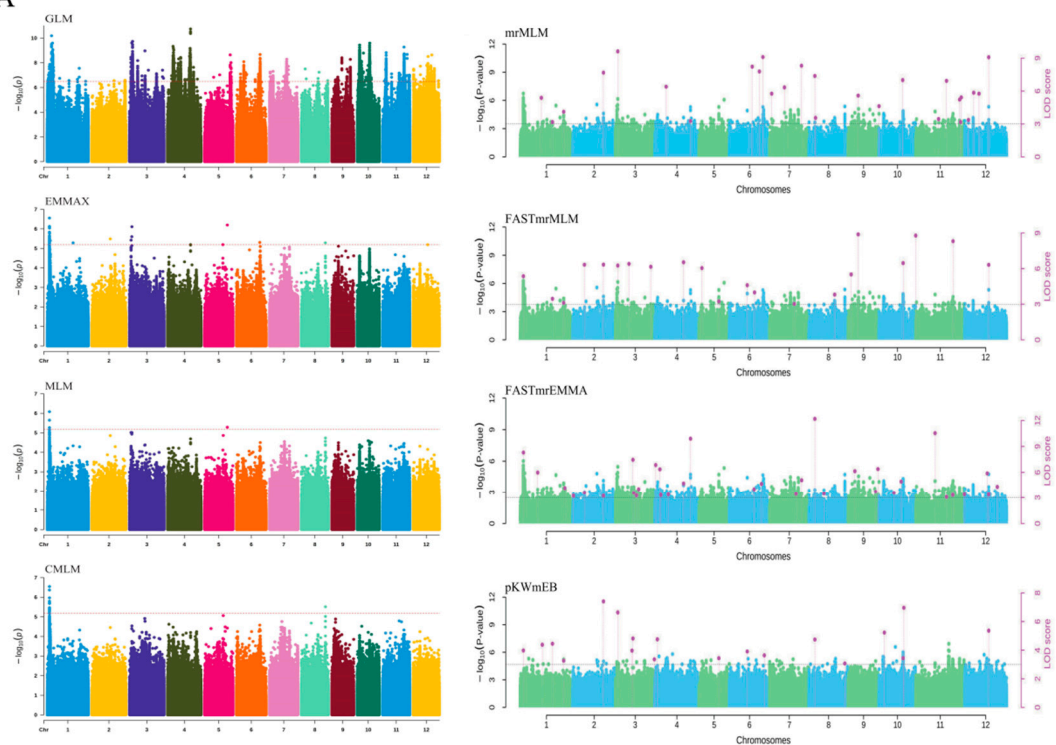

B

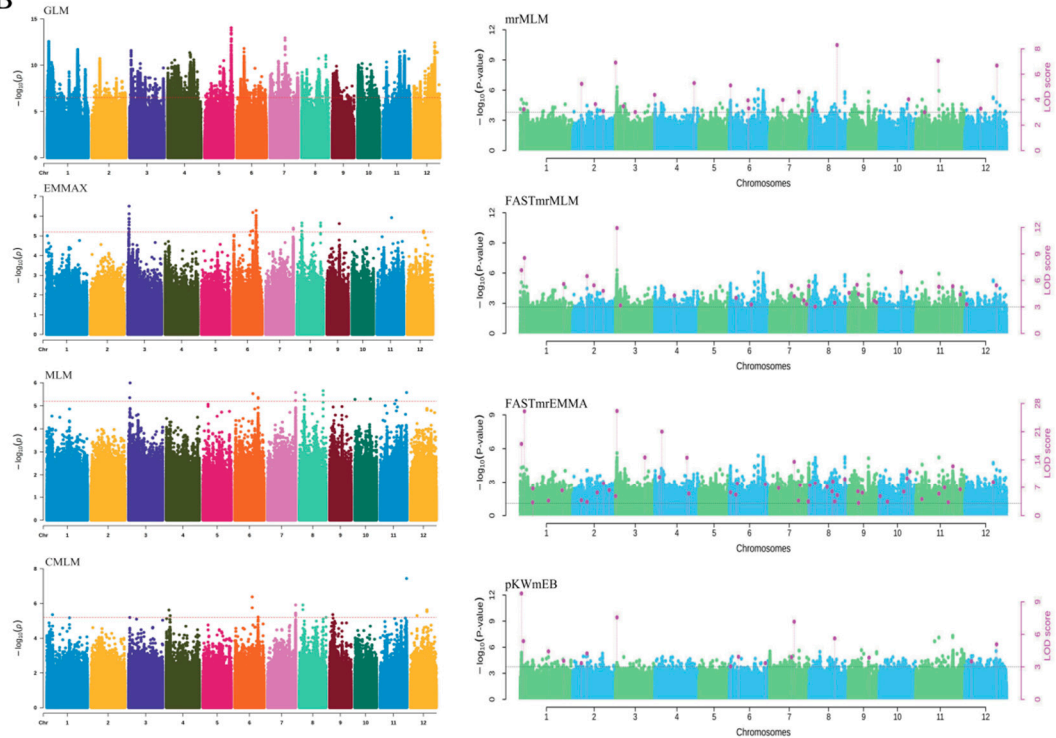

C

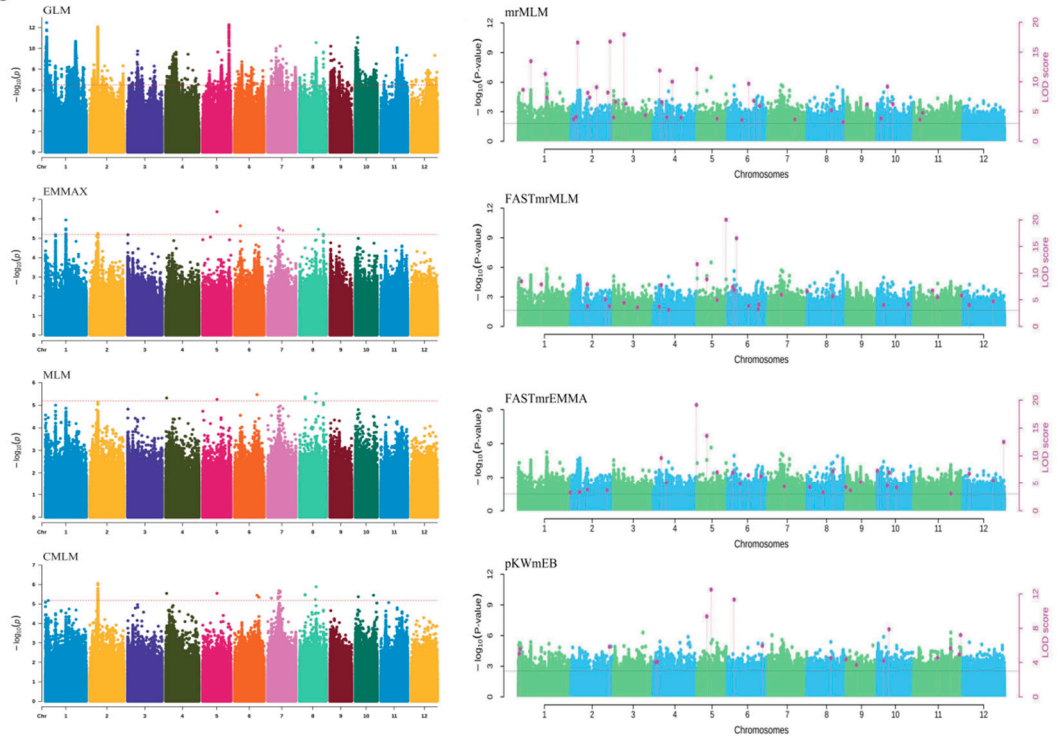

D

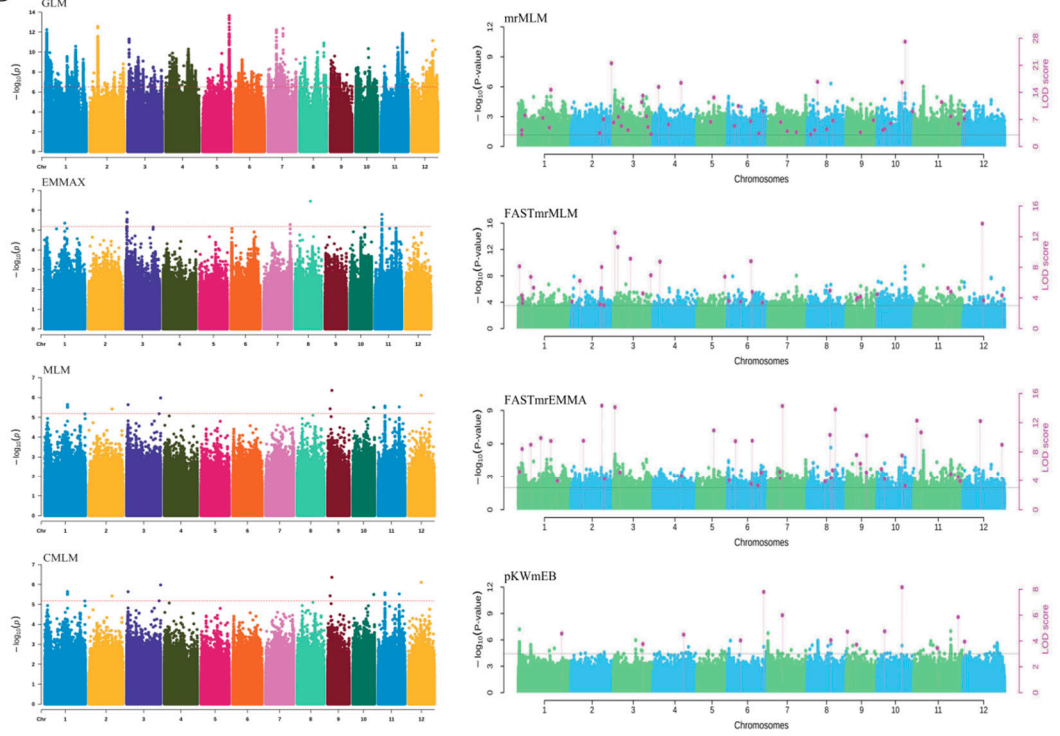

E

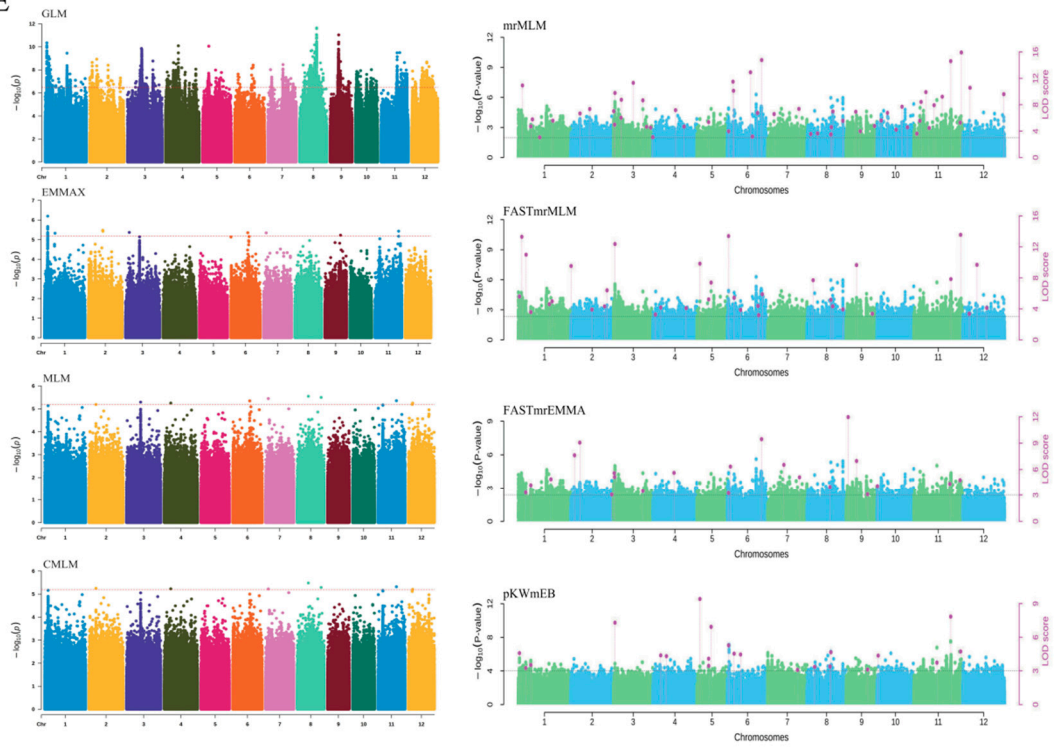

F

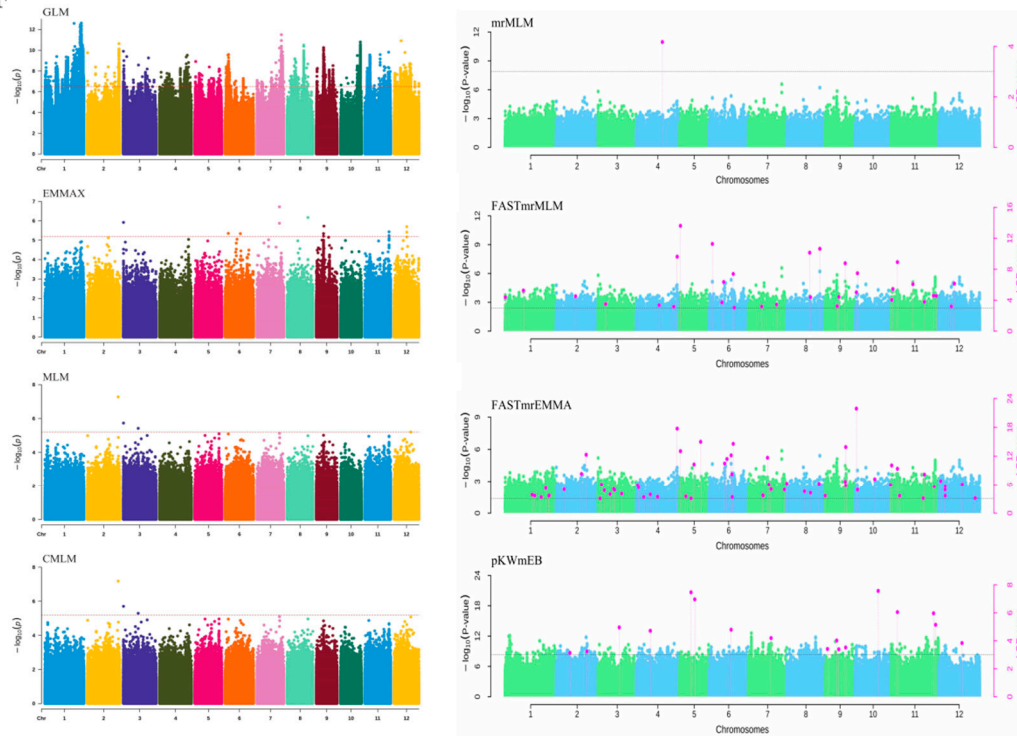

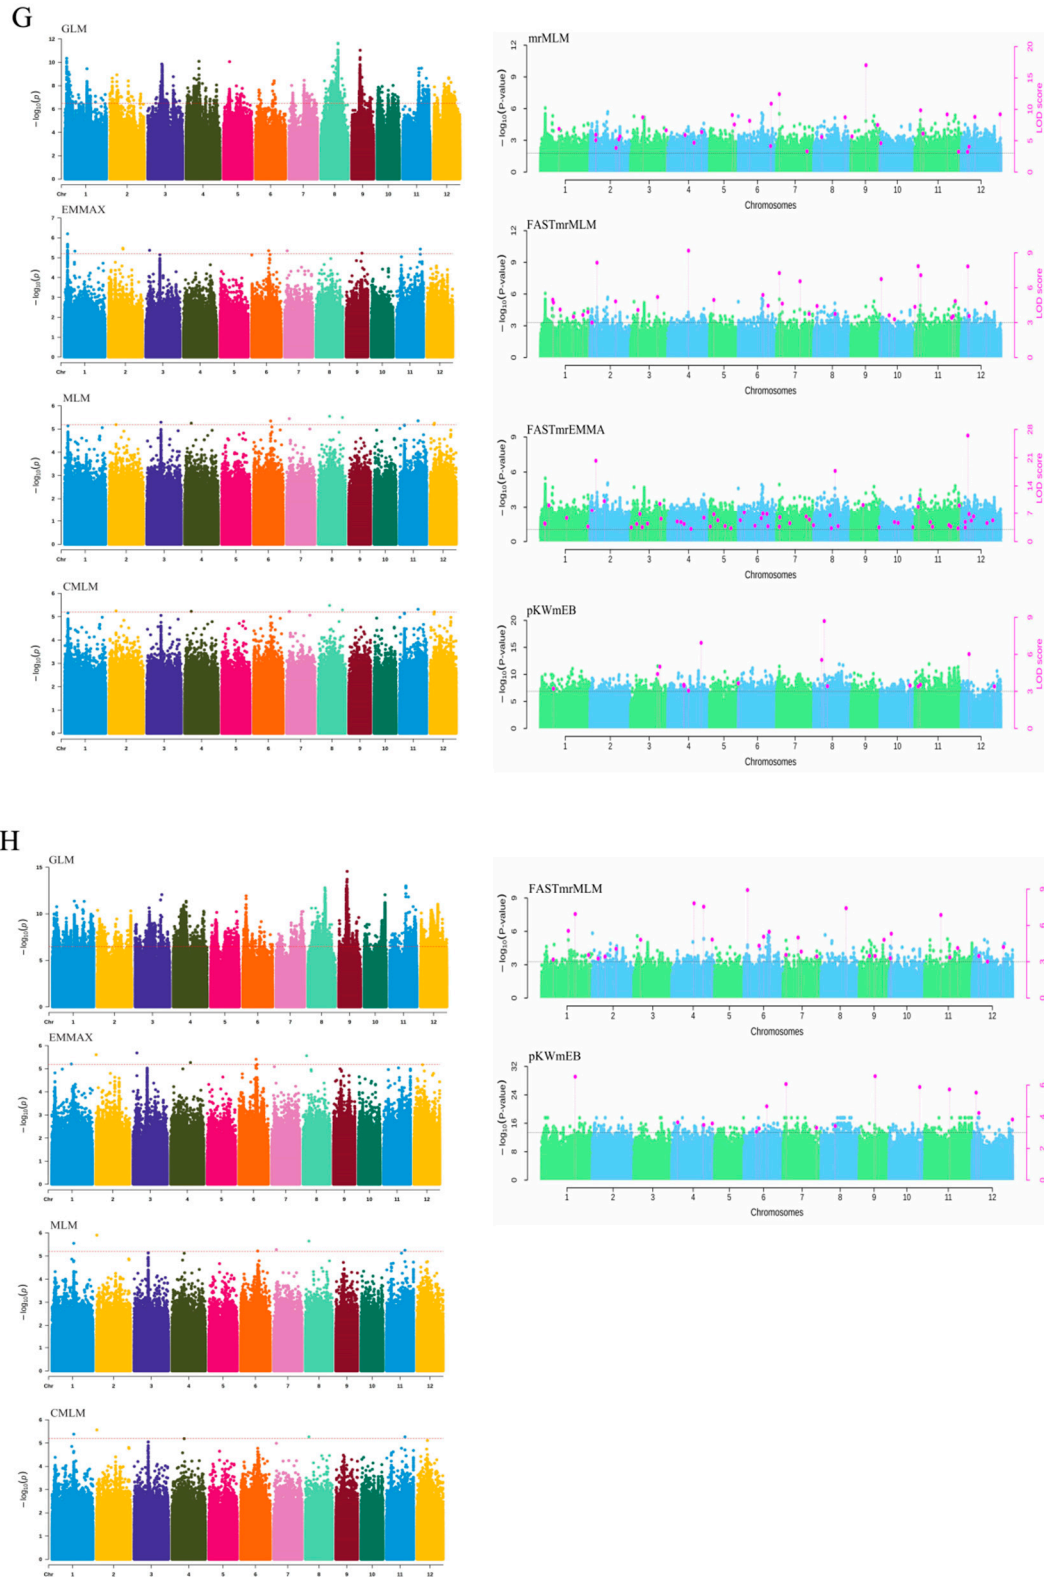

**Supplementary Figure S1:** Manhattan plots for grain/leaf lysine content associated QTNs using GLM, MLM-based single-locus (MLM-SL), and mrMLM-series multi-locus (mrMLM-ML) models. Manhattan plots for grain/leaf lysine content in Grain\_env1\_r1 (A), Grain\_env1\_r2 (B), Grain\_env2\_r1(C), Grain\_env2\_r2 (D), Grain\_BLUP (E), Leaf\_env3\_r1 (F), Leaf\_env3\_r2 (G), and Leaf\_BLUP (H)

associated QTNs. MLM-SL includes EMMAX, MLM, and CMLM model. mrMLM-ML includes mrMLM, FASTmrMLM, FASTmrEMMA, and pKWmeB. Black horizontal lines in the Manhattan plots represent the genome-wide significant threshold.

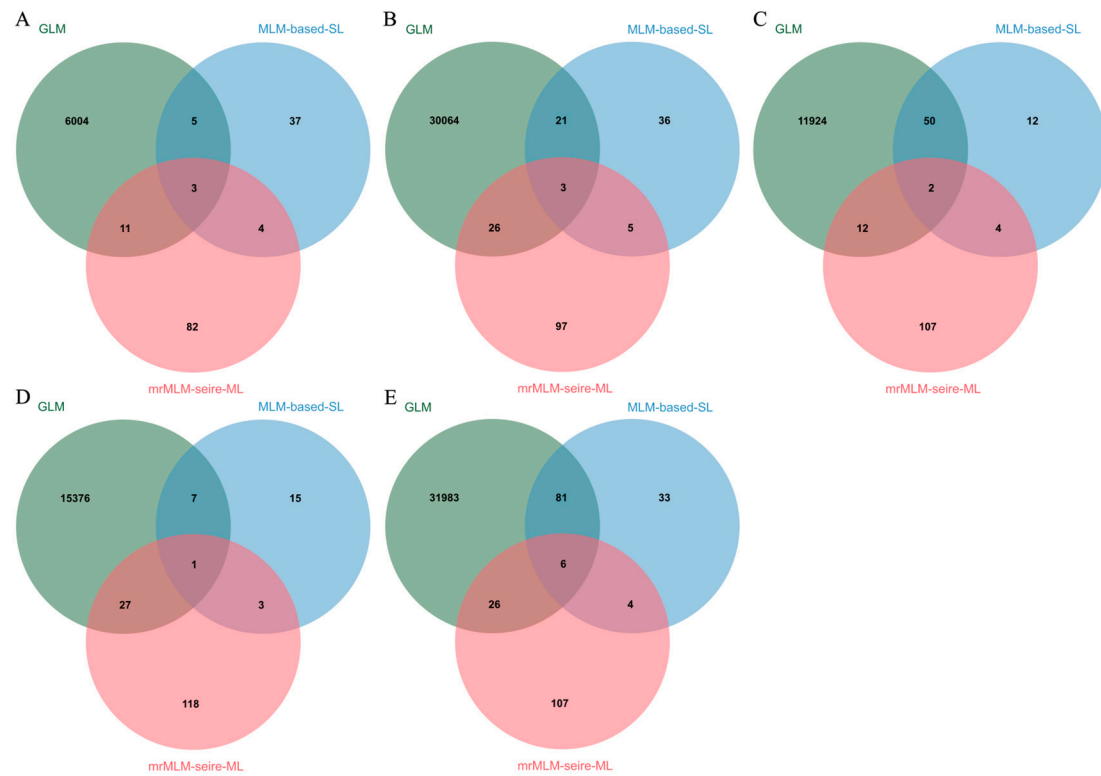

**Supplementary Figure S2:** Venn diagram of grain lysine associated QTNs using three GWAS models (GLM, MLM-SL, and mrMLM-ML). QTNs detected using five grain lysine content datasets Grain\_env1\_r1 (A), Grain\_env1\_r2 (B), Grain\_env2\_r1 (C), Grain\_env2\_r2 (D), and Grain\_BLUP (E).



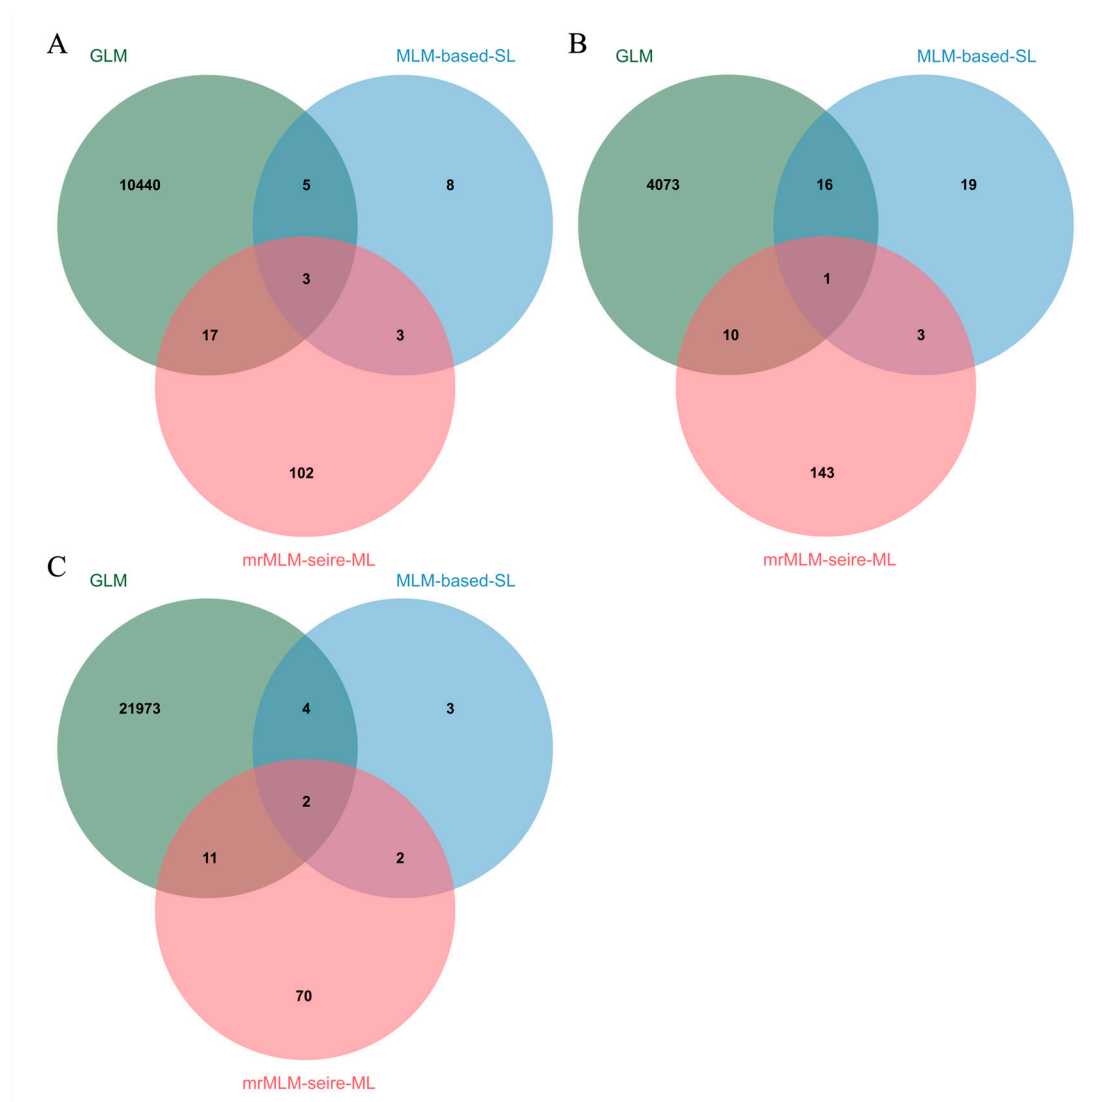

**Supplementary Figure S3:** Venn diagram of leaf lysine associated QTNs using three GWAS models (GLM, MLM-SL, and mrMLM-ML). QTNs detected using three leaf lysine content datasets Leaf\_env3\_r1 (A), Leaf\_env3\_r2 (B), and Leaf\_BLUP (C).

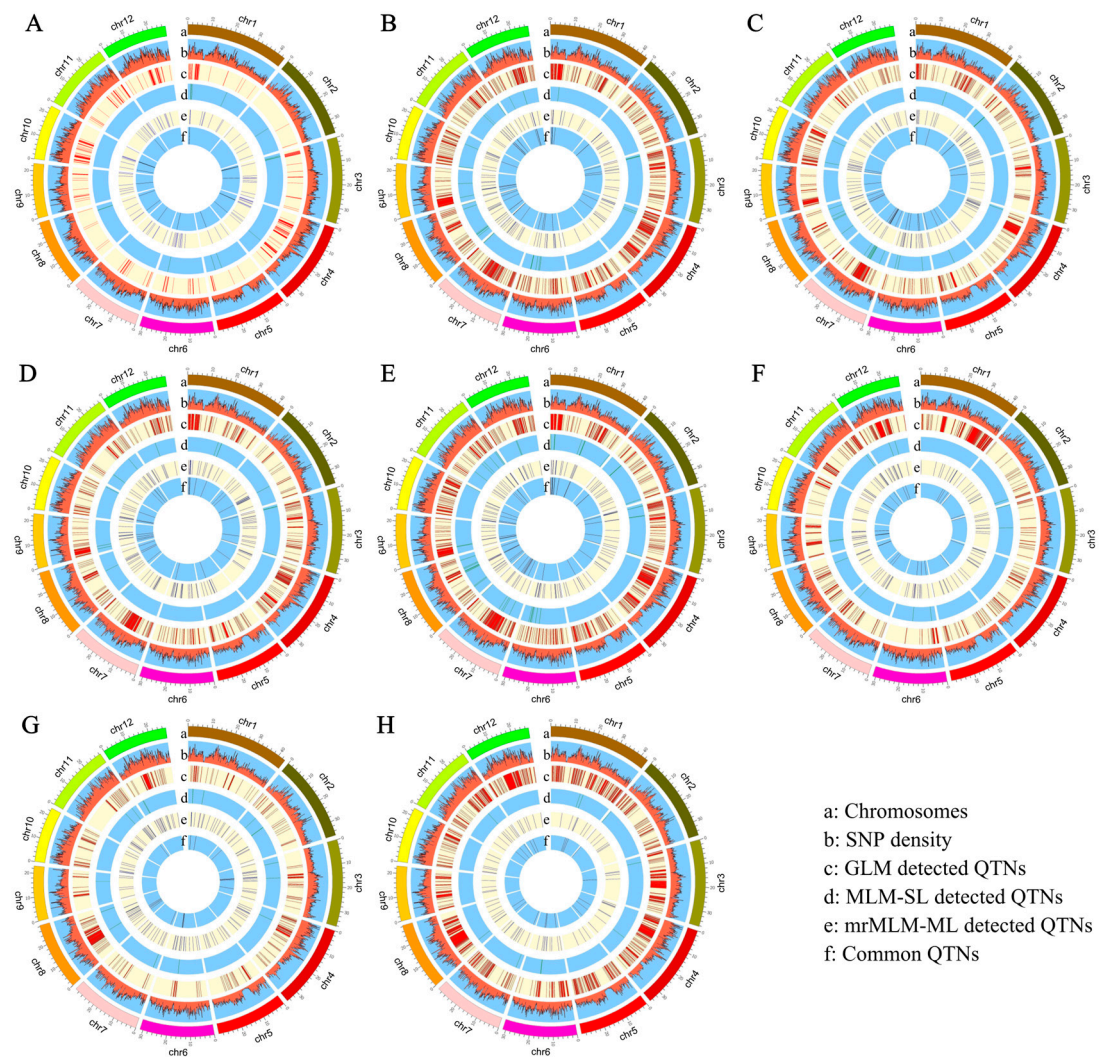

**Supplementary Figure S4:** Circos map of QTNs and common QTNs in rice genome identified from the grain/leaf lysine content datasets. Grain\_env1\_r1 (A), Grain\_env1\_r2 (B), Grain\_env2\_r1 (C), Grain\_env2\_r2 (D), and Grain\_BLUP (E) for grain lysine content, Leaf\_env3\_r1 (F), Leaf\_env3\_r2 (G), and Leaf\_BLUP (H) for leaf lysine content. Track a: 12 rice chromosomes; Track b: heatmap of SNP density with bin sizes of 0.1 Mb; Track c: GLM detected QTNs; Track d: MLM-based single-locus model (MLM-SL) detected QTNs; Track e: mrMLM-series multi-locus model (mrMLM-ML) detected QTNs; Track f: common QTNs detected by two or more GWAS models.



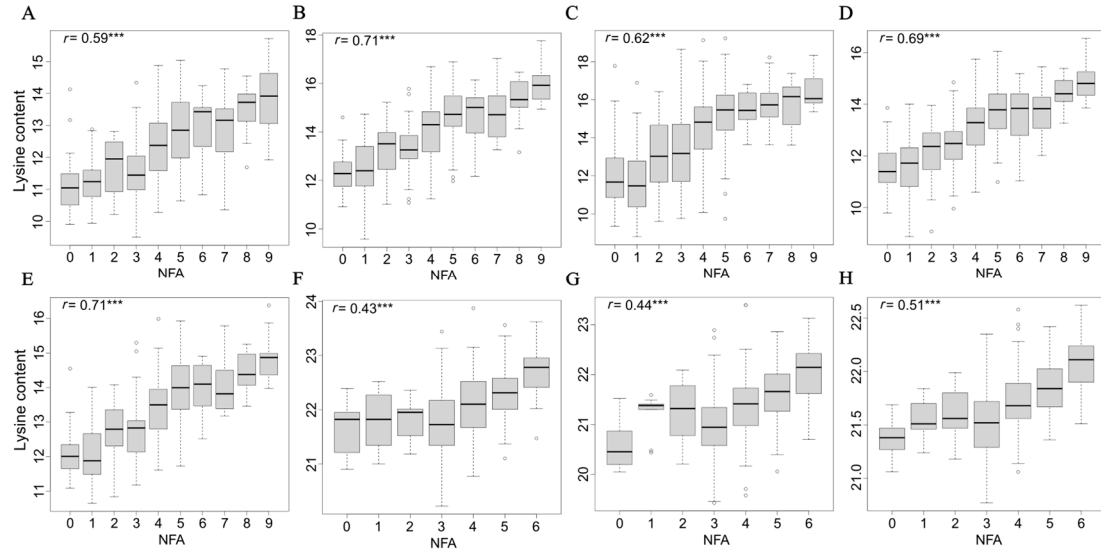

**Supplementary Figure S5:** Box plots illustrating the relationship between the number of favorable alleles (NFA) and lysine accumulation for five grain and three leaf lysine content datasets. The grain lysine Grain\_env1\_r1, Grain\_env1\_r2, Grain\_env2\_r1, Grain\_env2\_r2, and the best linear unbiased prediction (BLUP) datasets (A-E), the leaf lysine Leaf\_env3\_r1, Leaf\_env3\_r2, and BLUP datasets (F-H). \*\*\*indicates statistical significance at the 0.1% probability level.

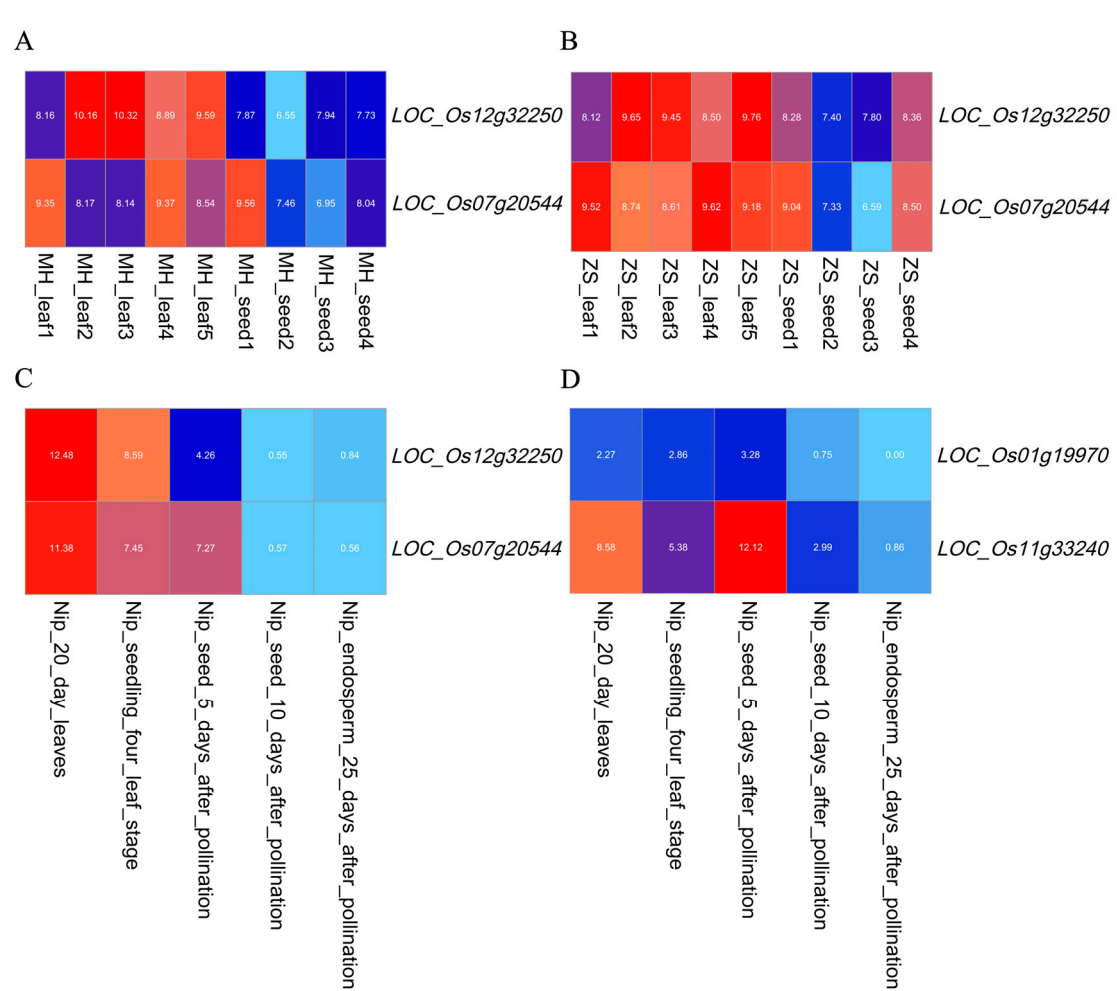

**Supplementary Figure S6:** Heat map of expression levels of the key genes *LOC\_Os12g32250*, *LOC\_Os07g20544*, *LOC\_Os01g19970*, and *LOC\_Os11g33240*. Heat map of expression level of the key genes *LOC\_Os12g32250* and *LOC\_Os07g20544* in grain and leaf tissue of Nipponbare (A), Minghui 63 (B), and Zhenshan 97 (C) varieties. Heat map of expression level of the key genes *LOC\_Os01g19970* and *LOC\_Os11g33240* in grain and leaf tissue of Nipponbare (D). The red indicates a high expression, and the blue represents a low expression.

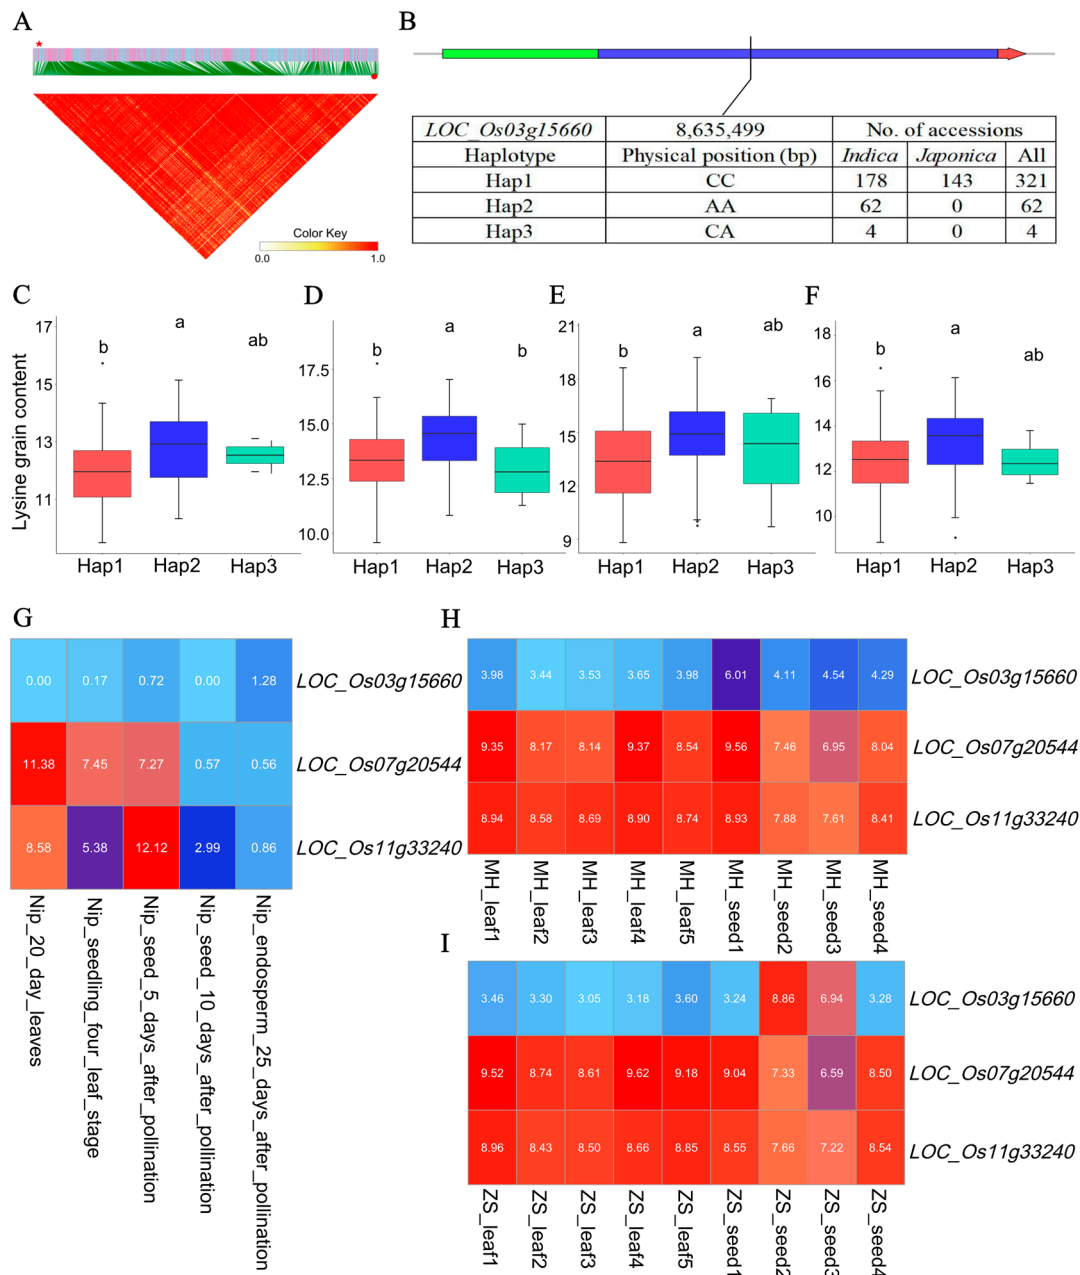

**Supplementary Figure S7:** Analyses of the key candidate gene *LOC\_Os03g15660* related to lysine content in rice. (A) Local linkage disequilibrium block analysis, red star and red dot indicate *LOC\_Os03g15660* and QTN-sf0308698430 locus. (B) Three haplotypes of *LOC\_Os03g15660* and their distribution in *indica* and *japonica* accessions. The blue, red, and green boxes represent the coding sequence (CDS), five prime UTR, and three prime UTR of a gene, respectively. Haplotypic variation and lysine content analysis of *LOC\_Os03g15660* in 387 rice accessions in Grain\_env1\_r1 (C), Grain\_env1\_r2 (D), Grain\_env2\_r1 (E), and Grain\_env2\_r2 (F) content datasets. Different letters indicate statistically significant differences at the 5% probability level in LSD test. Heat map of expression level of the key genes *LOC\_Os03g15660*, *LOC\_Os07g20544*, and *LOC\_Os11g33240* in grain and leaf tissue of Nipponbare (G), Minghui 63 (H) and Zhenshan 97 (I) varieties. The red indicates a high expression, and the blue represents a low expression.
