# Supplementary material for: New Insights into the Genetic Basis of Lysine Accumulation in Rice Revealed by Multi-Model GWAS
Source: Int J Mol Sci. 2024 Apr 25;25(9):4667. doi: 10.3390/ijms25094667 (PMC11083390; doi:10.3390/ijms25094667)
Supplement: Supplementary file 1 [file ijms-25-04667-s001.zip › Supplementary Tables S1-6.xlsx]

## Sheet: Supplementary Table S1
Supplementary Table S1 | Summary of QTNs detected from grain/leaf lysine content datasets in rice.
Dataset	Model	QTN	SNP	Chromosome	Position	P-value	LOD score	Reported QTN	Reference
Grain_env1_r1	GLM	QTN-sf0100586244	T/C	1	586244	3.0805e-07
Grain_env1_r1	GLM	QTN-sf0100795438	T/C	1	795438	3.1028e-07
Grain_env1_r1	GLM	QTN-sf0100853967	T/C	1	853967	2.4205e-07
Grain_env1_r1	GLM	QTN-sf0100910760	A/T	1	910760	2.7122e-07
Grain_env1_r1	GLM	QTN-sf0101468627	T/C	1	1468627	1.6815e-07
Grain_env1_r1	GLM	QTN-sf0101596219	A/G	1	1596219	2.0361e-07
Grain_env1_r1	GLM	QTN-sf0101621097	T/C	1	1621097	8.9577e-08
Grain_env1_r1	GLM	QTN-sf0101634776	G/A	1	1634776	1.9582e-07				Model		Threshold
Grain_env1_r1	GLM	QTN-sf0101639224	C/T	1	1639224	1.0238e-07				GLM	GLM	3.22e-07
Grain_env1_r1	GLM	QTN-sf0101650273	A/C	1	1650273	1.7866e-07				MLM-based single-locus	EMMAX	6.4336e-06
Grain_env1_r1	GLM	QTN-sf0101650502	C/T	1	1650502	3.0298e-07					MLM	6.4336e-06
Grain_env1_r1	GLM	QTN-sf0102259021	G/A	1	2259021	2.2743e-07					CMLM	6.4336e-06
Grain_env1_r1	GLM	QTN-sf0102325743	C/A	1	2325743	3.1663e-08				mrMLM series multi-locus	mrMLM	LOD≥3
Grain_env1_r1	GLM	QTN-sf0102331453	C/T	1	2331453	1.4401e-07					FASTmrMLM
Grain_env1_r1	GLM	QTN-sf0102342460	G/C	1	2342460	3.1434e-07					FASTmrEMMA
Grain_env1_r1	GLM	QTN-sf0102352673	A/T	1	2352673	2.4105e-07					pKWmEB
Grain_env1_r1	GLM	QTN-sf0102353163	C/T	1	2353163	6.1817e-08					pLARmEB
Grain_env1_r1	GLM	QTN-sf0102354421	G/C	1	2354421	2.6957e-07					ISIS EM-BLASSO
Grain_env1_r1	GLM	QTN-sf0102355189	A/G	1	2355189	1.1419e-07
Grain_env1_r1	GLM	QTN-sf0102355346	G/A	1	2355346	1.1995e-07
Grain_env1_r1	GLM	QTN-sf0102355564	C/T	1	2355564	2.0555e-08
Grain_env1_r1	GLM	QTN-sf0102367514	T/C	1	2367514	1.8292e-07
Grain_env1_r1	GLM	QTN-sf0102369162	G/C	1	2369162	2.8627e-07
Grain_env1_r1	GLM	QTN-sf0102665803	G/T	1	2665803	1.3612e-08
Grain_env1_r1	GLM	QTN-sf0102665848	C/A	1	2665848	6.987e-08
Grain_env1_r1	GLM	QTN-sf0104168740	A/G	1	4168740	1.6533e-07
Grain_env1_r1	GLM	QTN-sf0104169684	A/G	1	4169684	1.1388e-07
Grain_env1_r1	GLM	QTN-sf0104169686	A/T	1	4169686	1.1388e-07
Grain_env1_r1	GLM	QTN-sf0104496391	C/G	1	4496391	3.0496e-07
Grain_env1_r1	GLM	QTN-sf0104500121	G/T	1	4500121	2.4486e-07
Grain_env1_r1	GLM	QTN-sf0104508335	T/C	1	4508335	2.8396e-07
Grain_env1_r1	GLM	QTN-sf0104508355	A/T	1	4508355	2.8396e-07
Grain_env1_r1	GLM	QTN-sf0104510022	C/G	1	4510022	3.9981e-08
Grain_env1_r1	GLM	QTN-sf0104512647	C/T	1	4512647	1.8566e-08
Grain_env1_r1	GLM	QTN-sf0104513781	G/T	1	4513781	1.6421e-07
Grain_env1_r1	GLM	QTN-sf0104521235	A/T	1	4521235	2.4019e-07
Grain_env1_r1	GLM	QTN-sf0104522193	G/A	1	4522193	2.002e-07
Grain_env1_r1	GLM	QTN-sf0104522337	T/C	1	4522337	4.7139e-08
Grain_env1_r1	GLM	QTN-sf0104522492	A/G	1	4522492	4.7139e-08
Grain_env1_r1	GLM	QTN-sf0104522533	A/C	1	4522533	3.068e-08
Grain_env1_r1	GLM	QTN-sf0104522617	T/G	1	4522617	3.1703e-07
Grain_env1_r1	GLM	QTN-sf0104525061	G/A	1	4525061	3.2012e-07
Grain_env1_r1	GLM	QTN-sf0104525597	G/A	1	4525597	3.093e-07
Grain_env1_r1	GLM	QTN-sf0104528133	T/G	1	4528133	1.8146e-07
Grain_env1_r1	GLM	QTN-sf0104530850	C/G	1	4530850	1.6274e-07
Grain_env1_r1	GLM	QTN-sf0104531915	G/A	1	4531915	6.2809e-08
Grain_env1_r1	GLM	QTN-sf0104532302	T/A	1	4532302	3.045e-07
Grain_env1_r1	GLM	QTN-sf0104532493	T/C	1	4532493	3.5717e-08
Grain_env1_r1	GLM	QTN-sf0104532534	G/A	1	4532534	1.3315e-07
Grain_env1_r1	GLM	QTN-sf0104532612	A/G	1	4532612	8.2325e-08
Grain_env1_r1	GLM	QTN-sf0104532836	T/G	1	4532836	2.7175e-08
Grain_env1_r1	GLM	QTN-sf0104533214	A/G	1	4533214	4.8312e-08
Grain_env1_r1	GLM	QTN-sf0104542798	T/A	1	4542798	5.5644e-08
Grain_env1_r1	GLM	QTN-sf0104544672	T/C	1	4544672	1.5101e-07
Grain_env1_r1	GLM	QTN-sf0104560511	G/A	1	4560511	5.1836e-08
Grain_env1_r1	GLM	QTN-sf0104560833	A/G	1	4560833	9.0581e-08
Grain_env1_r1	GLM	QTN-sf0104563386	A/C	1	4563386	1.9969e-08
Grain_env1_r1	GLM	QTN-sf0104563688	A/T	1	4563688	9.3097e-08
Grain_env1_r1	GLM	QTN-sf0104564182	A/G	1	4564182	2.3126e-08
Grain_env1_r1	GLM	QTN-sf0104564217	A/G	1	4564217	2.3126e-08
Grain_env1_r1	GLM	QTN-sf0104564403	T/G	1	4564403	9.4863e-08
Grain_env1_r1	GLM	QTN-sf0104564845	A/G	1	4564845	1.1454e-07
Grain_env1_r1	GLM	QTN-sf0104564983	A/G	1	4564983	1.0542e-07
Grain_env1_r1	GLM	QTN-sf0104566056	T/G	1	4566056	1.1454e-07
Grain_env1_r1	GLM	QTN-sf0104569747	C/G	1	4569747	6.1191e-09
Grain_env1_r1	GLM	QTN-sf0104631554	A/G	1	4631554	1.6072e-07
Grain_env1_r1	GLM	QTN-sf0104633071	A/G	1	4633071	5.2554e-10
Grain_env1_r1	GLM	QTN-sf0104633096	T/C	1	4633096	1.4161e-09
Grain_env1_r1	GLM	QTN-sf0104633696	T/C	1	4633696	3.6444e-10
Grain_env1_r1	GLM	QTN-sf0104634053	A/G	1	4634053	4.848e-09
Grain_env1_r1	GLM	QTN-sf0104634074	T/C	1	4634074	1.8643e-09
Grain_env1_r1	GLM	QTN-sf0104634413	A/T	1	4634413	4.5025e-10
Grain_env1_r1	GLM	QTN-sf0104634414	G/C	1	4634414	4.5025e-10
Grain_env1_r1	GLM	QTN-sf0104634607	A/G	1	4634607	6.5028e-11
Grain_env1_r1	GLM	QTN-sf0104634791	T/C	1	4634791	4.5025e-10
Grain_env1_r1	GLM	QTN-sf0104635501	T/G	1	4635501	3.0678e-10
Grain_env1_r1	GLM	QTN-sf0104685937	A/G	1	4685937	7.5937e-08
Grain_env1_r1	GLM	QTN-sf0104782778	T/C	1	4782778	2.084e-07
Grain_env1_r1	GLM	QTN-sf0104787779	A/G	1	4787779	2.9336e-07
Grain_env1_r1	GLM	QTN-sf0104824236	G/C	1	4824236	1.3779e-07
Grain_env1_r1	GLM	QTN-sf0104831111	T/C	1	4831111	1.5105e-08
Grain_env1_r1	GLM	QTN-sf0104903156	G/C	1	4903156	1.2815e-08
Grain_env1_r1	GLM	QTN-sf0105005551	T/C	1	5005551	6.8483e-08
Grain_env1_r1	GLM	QTN-sf0105008473	A/C	1	5008473	5.5064e-08
Grain_env1_r1	GLM	QTN-sf0105027577	T/G	1	5027577	4.8622e-08
Grain_env1_r1	GLM	QTN-sf0105038845	T/C	1	5038845	1.416e-07
Grain_env1_r1	GLM	QTN-sf0105466157	A/C	1	5466157	1.524e-07
Grain_env1_r1	GLM	QTN-sf0105474858	T/C	1	5474858	9.4109e-08
Grain_env1_r1	GLM	QTN-sf0105476190	T/C	1	5476190	7.4064e-09
Grain_env1_r1	GLM	QTN-sf0105476527	A/G	1	5476527	1.6371e-07
Grain_env1_r1	GLM	QTN-sf0105476848	G/A	1	5476848	7.8649e-09
Grain_env1_r1	GLM	QTN-sf0105478645	C/T	1	5478645	1.7689e-08
Grain_env1_r1	GLM	QTN-sf0105479304	A/G	1	5479304	3.0384e-07
Grain_env1_r1	GLM	QTN-sf0105479977	A/G	1	5479977	8.2148e-08
Grain_env1_r1	GLM	QTN-sf0105480025	T/C	1	5480025	1.1484e-07
Grain_env1_r1	GLM	QTN-sf0105480030	C/T	1	5480030	1.0525e-07
Grain_env1_r1	GLM	QTN-sf0105480621	G/A	1	5480621	4.8035e-09
Grain_env1_r1	GLM	QTN-sf0105480646	T/C	1	5480646	3.6547e-08
Grain_env1_r1	GLM	QTN-sf0105480711	A/G	1	5480711	6.2942e-09
Grain_env1_r1	GLM	QTN-sf0105480715	A/G	1	5480715	6.2942e-09
Grain_env1_r1	GLM	QTN-sf0105480873	G/A	1	5480873	3.6547e-08
Grain_env1_r1	GLM	QTN-sf0105480905	A/G	1	5480905	6.457e-08
Grain_env1_r1	GLM	QTN-sf0105481621	G/A	1	5481621	3.261e-08
Grain_env1_r1	GLM	QTN-sf0105481735	A/C	1	5481735	1.5313e-07
Grain_env1_r1	GLM	QTN-sf0105481987	A/C	1	5481987	2.5083e-08
Grain_env1_r1	GLM	QTN-sf0105482000	A/G	1	5482000	4.8035e-09
Grain_env1_r1	GLM	QTN-sf0105482108	T/C	1	5482108	1.8661e-08
Grain_env1_r1	GLM	QTN-sf0105482136	A/G	1	5482136	8.9896e-09
Grain_env1_r1	GLM	QTN-sf0105482182	A/G	1	5482182	2.3319e-07
Grain_env1_r1	GLM	QTN-sf0105482379	C/T	1	5482379	2.0435e-07
Grain_env1_r1	GLM	QTN-sf0105483830	C/A	1	5483830	4.8035e-09
Grain_env1_r1	GLM	QTN-sf0105483832	A/T	1	5483832	4.8035e-09
Grain_env1_r1	GLM	QTN-sf0105485972	G/T	1	5485972	2.2778e-07
Grain_env1_r1	GLM	QTN-sf0105487140	A/G	1	5487140	4.046e-08
Grain_env1_r1	GLM	QTN-sf0105488084	T/C	1	5488084	4.9608e-08
Grain_env1_r1	GLM	QTN-sf0105488750	T/C	1	5488750	3.225e-08
Grain_env1_r1	GLM	QTN-sf0105489211	T/C	1	5489211	4.8597e-08
Grain_env1_r1	GLM	QTN-sf0105489220	T/C	1	5489220	4.8597e-08
Grain_env1_r1	GLM	QTN-sf0105489229	A/G	1	5489229	4.8597e-08
Grain_env1_r1	GLM	QTN-sf0105489724	A/G	1	5489724	1.2071e-07
Grain_env1_r1	GLM	QTN-sf0105489973	C/T	1	5489973	1.3769e-07
Grain_env1_r1	GLM	QTN-sf0105490031	A/G	1	5490031	2.2839e-07
Grain_env1_r1	GLM	QTN-sf0105490998	T/G	1	5490998	4.1288e-08
Grain_env1_r1	GLM	QTN-sf0105490999	T/C	1	5490999	4.1288e-08
Grain_env1_r1	GLM	QTN-sf0105492044	G/C	1	5492044	6.9494e-08
Grain_env1_r1	GLM	QTN-sf0105493532	T/G	1	5493532	3.2084e-09
Grain_env1_r1	GLM	QTN-sf0105499748	G/A	1	5499748	1.2338e-08
Grain_env1_r1	GLM	QTN-sf0105499813	T/C	1	5499813	5.4878e-08
Grain_env1_r1	GLM	QTN-sf0105500347	A/T	1	5500347	2.2409e-08
Grain_env1_r1	GLM	QTN-sf0105500478	A/G	1	5500478	1.3843e-07
Grain_env1_r1	GLM	QTN-sf0105500511	A/G	1	5500511	3.5922e-08
Grain_env1_r1	GLM	QTN-sf0105500639	A/C	1	5500639	2.6824e-07
Grain_env1_r1	GLM	QTN-sf0105500643	T/C	1	5500643	2.6824e-07
Grain_env1_r1	GLM	QTN-sf0105502905	A/T	1	5502905	3.1724e-08
Grain_env1_r1	GLM	QTN-sf0105503701	T/C	1	5503701	1.4099e-07
Grain_env1_r1	GLM	QTN-sf0105504848	G/C	1	5504848	1.1495e-07
Grain_env1_r1	GLM	QTN-sf0105504886	A/G	1	5504886	2.0547e-07
Grain_env1_r1	GLM	QTN-sf0105505033	C/G	1	5505033	2.3346e-07
Grain_env1_r1	GLM	QTN-sf0105505542	A/G	1	5505542	3.519e-08
Grain_env1_r1	GLM	QTN-sf0105505757	C/A	1	5505757	5.6497e-08
Grain_env1_r1	GLM	QTN-sf0105507930	T/C	1	5507930	4.2546e-08
Grain_env1_r1	GLM	QTN-sf0105510856	C/T	1	5510856	1.9781e-08
Grain_env1_r1	GLM	QTN-sf0105511289	T/A	1	5511289	1.2707e-07
Grain_env1_r1	GLM	QTN-sf0105513305	C/T	1	5513305	7.6701e-08
Grain_env1_r1	GLM	QTN-sf0105513630	T/C	1	5513630	4.0445e-08
Grain_env1_r1	GLM	QTN-sf0105513652	T/C	1	5513652	4.0445e-08
Grain_env1_r1	GLM	QTN-sf0105513699	C/T	1	5513699	4.0445e-08
Grain_env1_r1	GLM	QTN-sf0105513748	T/C	1	5513748	2.0866e-08
Grain_env1_r1	GLM	QTN-sf0105513830	G/A	1	5513830	1.3043e-08
Grain_env1_r1	GLM	QTN-sf0105515108	A/G	1	5515108	4.2683e-08
Grain_env1_r1	GLM	QTN-sf0105515250	T/C	1	5515250	1.2817e-08
Grain_env1_r1	GLM	QTN-sf0105516983	A/G	1	5516983	1.0039e-07
Grain_env1_r1	GLM	QTN-sf0105517589	T/C	1	5517589	4.3385e-08
Grain_env1_r1	GLM	QTN-sf0105518306	A/C	1	5518306	1.1391e-09
Grain_env1_r1	GLM	QTN-sf0105520171	G/T	1	5520171	7.3688e-08
Grain_env1_r1	GLM	QTN-sf0105520255	T/G	1	5520255	3.8431e-08
Grain_env1_r1	GLM	QTN-sf0105520372	C/G	1	5520372	8.549e-09
Grain_env1_r1	GLM	QTN-sf0105520745	T/C	1	5520745	1.5704e-08
Grain_env1_r1	GLM	QTN-sf0105520808	A/G	1	5520808	2.0928e-08
Grain_env1_r1	GLM	QTN-sf0105520825	A/G	1	5520825	9.476e-09
Grain_env1_r1	GLM	QTN-sf0105521075	T/C	1	5521075	6.3016e-09
Grain_env1_r1	GLM	QTN-sf0105521573	A/G	1	5521573	1.2773e-08
Grain_env1_r1	GLM	QTN-sf0105521595	G/A	1	5521595	4.2546e-08
Grain_env1_r1	GLM	QTN-sf0105521677	T/C	1	5521677	1.0312e-08
Grain_env1_r1	GLM	QTN-sf0105522177	C/A	1	5522177	2.3306e-08
Grain_env1_r1	GLM	QTN-sf0105522502	T/G	1	5522502	3.8611e-08
Grain_env1_r1	GLM	QTN-sf0105522691	G/A	1	5522691	1.0179e-07
Grain_env1_r1	GLM	QTN-sf0105522692	A/G	1	5522692	1.0179e-07
Grain_env1_r1	GLM	QTN-sf0105522761	T/C	1	5522761	2.1876e-08
Grain_env1_r1	GLM	QTN-sf0105522873	T/C	1	5522873	5.4852e-09
Grain_env1_r1	GLM	QTN-sf0105522989	C/T	1	5522989	1.9546e-08
Grain_env1_r1	GLM	QTN-sf0105523018	T/A	1	5523018	8.8072e-09
Grain_env1_r1	GLM	QTN-sf0105523245	G/A	1	5523245	5.9652e-09
Grain_env1_r1	GLM	QTN-sf0105523262	T/C	1	5523262	2.8004e-08
Grain_env1_r1	GLM	QTN-sf0105523450	T/A	1	5523450	8.8238e-09
Grain_env1_r1	GLM	QTN-sf0105524541	A/C	1	5524541	1.5953e-08
Grain_env1_r1	GLM	QTN-sf0105524607	A/T	1	5524607	3.8846e-08
Grain_env1_r1	GLM	QTN-sf0105524704	A/G	1	5524704	1.3804e-07
Grain_env1_r1	GLM	QTN-sf0105524887	C/A	1	5524887	5.211e-08
Grain_env1_r1	GLM	QTN-sf0105526983	T/C	1	5526983	5.0159e-08
Grain_env1_r1	GLM	QTN-sf0105529385	T/A	1	5529385	1.9528e-07
Grain_env1_r1	GLM	QTN-sf0105533660	T/C	1	5533660	2.1009e-07
Grain_env1_r1	GLM	QTN-sf0105533934	A/T	1	5533934	2.8742e-07
Grain_env1_r1	GLM	QTN-sf0105537171	G/A	1	5537171	1.7822e-07
Grain_env1_r1	GLM	QTN-sf0105538790	G/T	1	5538790	5.7754e-08
Grain_env1_r1	GLM	QTN-sf0105541336	T/C	1	5541336	1.4898e-07
Grain_env1_r1	GLM	QTN-sf0105542031	T/C	1	5542031	1.8977e-07
Grain_env1_r1	GLM	QTN-sf0105544370	T/C	1	5544370	2.0653e-07
Grain_env1_r1	GLM	QTN-sf0105544634	G/A	1	5544634	1.9601e-07
Grain_env1_r1	GLM	QTN-sf0105545093	T/C	1	5545093	1.9149e-07
Grain_env1_r1	GLM	QTN-sf0105545245	A/G	1	5545245	2.8627e-07
Grain_env1_r1	GLM	QTN-sf0105545252	T/C	1	5545252	2.8627e-07
Grain_env1_r1	GLM	QTN-sf0105546296	C/T	1	5546296	2.0586e-07
Grain_env1_r1	GLM	QTN-sf0105546346	T/C	1	5546346	1.3469e-07
Grain_env1_r1	GLM	QTN-sf0105546380	T/C	1	5546380	1.3469e-07
Grain_env1_r1	GLM	QTN-sf0105546407	A/G	1	5546407	1.4732e-07
Grain_env1_r1	GLM	QTN-sf0105548144	A/G	1	5548144	3.0416e-07
Grain_env1_r1	GLM	QTN-sf0105553809	T/C	1	5553809	3.0449e-07
Grain_env1_r1	GLM	QTN-sf0105554731	G/A	1	5554731	2.3555e-07
Grain_env1_r1	GLM	QTN-sf0105556278	A/G	1	5556278	1.136e-07
Grain_env1_r1	GLM	QTN-sf0105556285	C/T	1	5556285	1.136e-07
Grain_env1_r1	GLM	QTN-sf0105556416	G/A	1	5556416	2.8069e-09
Grain_env1_r1	GLM	QTN-sf0105556526	A/G	1	5556526	1.3246e-08
Grain_env1_r1	GLM	QTN-sf0105556648	T/A	1	5556648	4.0373e-08
Grain_env1_r1	GLM	QTN-sf0105558307	A/G	1	5558307	5.0914e-08
Grain_env1_r1	GLM	QTN-sf0105568518	G/C	1	5568518	2.0903e-08
Grain_env1_r1	GLM	QTN-sf0105569199	A/C	1	5569199	1.8677e-08
Grain_env1_r1	GLM	QTN-sf0105574869	A/G	1	5574869	1.6568e-08
Grain_env1_r1	GLM	QTN-sf0105575290	A/G	1	5575290	1.4917e-07
Grain_env1_r1	GLM	QTN-sf0105575977	A/C	1	5575977	1.0432e-07
Grain_env1_r1	GLM	QTN-sf0105576246	C/A	1	5576246	2.0364e-08
Grain_env1_r1	GLM	QTN-sf0105576306	A/G	1	5576306	2.8014e-08
Grain_env1_r1	GLM	QTN-sf0105576501	A/G	1	5576501	6.6491e-08
Grain_env1_r1	GLM	QTN-sf0105577038	A/G	1	5577038	5.1417e-09
Grain_env1_r1	GLM	QTN-sf0105579008	T/C	1	5579008	2.4053e-08
Grain_env1_r1	GLM	QTN-sf0105580038	G/C	1	5580038	3.6481e-09
Grain_env1_r1	GLM	QTN-sf0105580564	C/G	1	5580564	1.3621e-07
Grain_env1_r1	GLM	QTN-sf0105582072	C/A	1	5582072	5.964e-08
Grain_env1_r1	GLM	QTN-sf0105582193	T/C	1	5582193	7.2579e-08
Grain_env1_r1	GLM	QTN-sf0105584724	T/C	1	5584724	8.5584e-09
Grain_env1_r1	GLM	QTN-sf0105585554	A/G	1	5585554	1.2541e-08
Grain_env1_r1	GLM	QTN-sf0105586028	A/G	1	5586028	2.5448e-10
Grain_env1_r1	GLM	QTN-sf0105589613	G/A	1	5589613	2.2952e-07
Grain_env1_r1	GLM	QTN-sf0105590957	A/G	1	5590957	1.6143e-08
Grain_env1_r1	GLM	QTN-sf0105590960	G/A	1	5590960	3.2525e-08
Grain_env1_r1	GLM	QTN-sf0105591893	A/G	1	5591893	7.9909e-09
Grain_env1_r1	GLM	QTN-sf0105598893	T/A	1	5598893	1.6473e-09
Grain_env1_r1	GLM	QTN-sf0105600057	T/C	1	5600057	7.0817e-08
Grain_env1_r1	GLM	QTN-sf0105600644	A/G	1	5600644	5.2973e-08
Grain_env1_r1	GLM	QTN-sf0105603824	T/A	1	5603824	3.8341e-08
Grain_env1_r1	GLM	QTN-sf0105605399	T/A	1	5605399	2.3395e-07
Grain_env1_r1	GLM	QTN-sf0105605505	T/G	1	5605505	1.934e-08
Grain_env1_r1	GLM	QTN-sf0105608993	A/G	1	5608993	5.5339e-09
Grain_env1_r1	GLM	QTN-sf0105609811	A/G	1	5609811	1.3355e-08
Grain_env1_r1	GLM	QTN-sf0105638255	G/A	1	5638255	2.5255e-07
Grain_env1_r1	GLM	QTN-sf0105692570	T/C	1	5692570	2.2405e-07
Grain_env1_r1	GLM	QTN-sf0105705891	G/T	1	5705891	2.5016e-08
Grain_env1_r1	GLM	QTN-sf0105706050	A/G	1	5706050	1.3953e-07
Grain_env1_r1	GLM	QTN-sf0105706650	A/G	1	5706650	3.2769e-08
Grain_env1_r1	GLM	QTN-sf0105706651	A/C	1	5706651	3.2769e-08
Grain_env1_r1	GLM	QTN-sf0105706739	G/A	1	5706739	1.5415e-07
Grain_env1_r1	GLM	QTN-sf0105707164	T/C	1	5707164	1.071e-07
Grain_env1_r1	GLM	QTN-sf0105707255	A/G	1	5707255	3.097e-07
Grain_env1_r1	GLM	QTN-sf0105707301	C/T	1	5707301	6.6937e-08
Grain_env1_r1	GLM	QTN-sf0105708530	G/C	1	5708530	1.7937e-07
Grain_env1_r1	GLM	QTN-sf0105708958	T/C	1	5708958	2.5761e-08
Grain_env1_r1	GLM	QTN-sf0105709093	T/C	1	5709093	1.3154e-08
Grain_env1_r1	GLM	QTN-sf0105709126	A/G	1	5709126	6.3374e-09
Grain_env1_r1	GLM	QTN-sf0105726921	C/T	1	5726921	1.4548e-07
Grain_env1_r1	GLM	QTN-sf0105726977	T/C	1	5726977	4.7911e-08
Grain_env1_r1	GLM	QTN-sf0105760696	G/A	1	5760696	2.7948e-08
Grain_env1_r1	GLM	QTN-sf0105760702	T/G	1	5760702	2.7948e-08
Grain_env1_r1	GLM	QTN-sf0105784680	A/G	1	5784680	2.0356e-07
Grain_env1_r1	GLM	QTN-sf0105862164	A/G	1	5862164	2.5023e-07
Grain_env1_r1	GLM	QTN-sf0105916207	C/T	1	5916207	1.3712e-07
Grain_env1_r1	GLM	QTN-sf0105916956	A/T	1	5916956	1.6705e-07
Grain_env1_r1	GLM	QTN-sf0105922082	C/T	1	5922082	8.0427e-08
Grain_env1_r1	GLM	QTN-sf0105922753	G/A	1	5922753	1.7339e-07
Grain_env1_r1	GLM	QTN-sf0105923303	C/T	1	5923303	6.5113e-08
Grain_env1_r1	GLM	QTN-sf0105923306	C/T	1	5923306	6.5113e-08
Grain_env1_r1	GLM	QTN-sf0105924237	C/T	1	5924237	1.9085e-07
Grain_env1_r1	GLM	QTN-sf0105926499	G/A	1	5926499	2.0666e-07
Grain_env1_r1	GLM	QTN-sf0105927081	C/T	1	5927081	8.9529e-08
Grain_env1_r1	GLM	QTN-sf0105930361	G/A	1	5930361	3.1236e-07
Grain_env1_r1	GLM	QTN-sf0105943760	C/T	1	5943760	2.5828e-07
Grain_env1_r1	GLM	QTN-sf0105958445	T/G	1	5958445	1.6488e-07
Grain_env1_r1	GLM	QTN-sf0105960409	G/A	1	5960409	1.6488e-07
Grain_env1_r1	GLM	QTN-sf0105961320	T/C	1	5961320	1.4879e-07
Grain_env1_r1	GLM	QTN-sf0105961873	A/G	1	5961873	1.9579e-07
Grain_env1_r1	GLM	QTN-sf0105963666	C/T	1	5963666	1.113e-07
Grain_env1_r1	GLM	QTN-sf0105968153	C/T	1	5968153	2.5007e-07
Grain_env1_r1	GLM	QTN-sf0105968762	G/A	1	5968762	1.7574e-07
Grain_env1_r1	GLM	QTN-sf0105969146	T/G	1	5969146	9.7589e-08
Grain_env1_r1	GLM	QTN-sf0105969658	C/G	1	5969658	5.3264e-08
Grain_env1_r1	GLM	QTN-sf0105969669	T/C	1	5969669	6.457e-08
Grain_env1_r1	GLM	QTN-sf0105970646	G/A	1	5970646	4.8215e-08
Grain_env1_r1	GLM	QTN-sf0105970958	A/G	1	5970958	3.149e-07
Grain_env1_r1	GLM	QTN-sf0105971455	A/G	1	5971455	2.1849e-07
Grain_env1_r1	GLM	QTN-sf0105972034	C/T	1	5972034	9.0387e-08
Grain_env1_r1	GLM	QTN-sf0105972129	G/T	1	5972129	2.0011e-08
Grain_env1_r1	GLM	QTN-sf0105972132	C/T	1	5972132	2.0011e-08
Grain_env1_r1	GLM	QTN-sf0105972968	G/A	1	5972968	1.1343e-07
Grain_env1_r1	GLM	QTN-sf0105973271	C/T	1	5973271	4.8215e-08
Grain_env1_r1	GLM	QTN-sf0105973291	C/T	1	5973291	4.8215e-08
Grain_env1_r1	GLM	QTN-sf0105973559	G/A	1	5973559	2.2529e-07
Grain_env1_r1	GLM	QTN-sf0105973714	G/A	1	5973714	2.4613e-07
Grain_env1_r1	GLM	QTN-sf0105973874	T/C	1	5973874	3.8292e-08
Grain_env1_r1	GLM	QTN-sf0105973934	C/T	1	5973934	2.8438e-07
Grain_env1_r1	GLM	QTN-sf0105974233	A/G	1	5974233	9.9925e-09
Grain_env1_r1	GLM	QTN-sf0105974304	G/T	1	5974304	3.7778e-08
Grain_env1_r1	GLM	QTN-sf0105974585	G/A	1	5974585	2.6868e-07
Grain_env1_r1	GLM	QTN-sf0105974635	C/T	1	5974635	2.6868e-07
Grain_env1_r1	GLM	QTN-sf0105974711	C/T	1	5974711	4.8215e-08
Grain_env1_r1	GLM	QTN-sf0105974765	C/T	1	5974765	1.1131e-07
Grain_env1_r1	GLM	QTN-sf0105974861	A/C	1	5974861	1.5139e-07
Grain_env1_r1	GLM	QTN-sf0105975438	T/A	1	5975438	2.5365e-07
Grain_env1_r1	GLM	QTN-sf0105975723	A/G	1	5975723	2.1849e-07
Grain_env1_r1	GLM	QTN-sf0105976040	C/T	1	5976040	2.512e-07
Grain_env1_r1	GLM	QTN-sf0105976351	G/A	1	5976351	2.9937e-07
Grain_env1_r1	GLM	QTN-sf0105976727	G/A	1	5976727	1.7768e-07
Grain_env1_r1	GLM	QTN-sf0105978878	C/A	1	5978878	1.445e-08
Grain_env1_r1	GLM	QTN-sf0105979118	G/A	1	5979118	8.7062e-10
Grain_env1_r1	GLM	QTN-sf0105979126	G/A	1	5979126	8.7062e-10
Grain_env1_r1	GLM	QTN-sf0105979548	C/A	1	5979548	1.8763e-07
Grain_env1_r1	GLM	QTN-sf0105979577	C/T	1	5979577	2.0361e-08
Grain_env1_r1	GLM	QTN-sf0105979594	C/T	1	5979594	2.0361e-08
Grain_env1_r1	GLM	QTN-sf0105979658	T/C	1	5979658	2.8575e-09
Grain_env1_r1	GLM	QTN-sf0105980024	G/A	1	5980024	1.0979e-08
Grain_env1_r1	GLM	QTN-sf0105980139	G/A	1	5980139	2.1233e-08
Grain_env1_r1	GLM	QTN-sf0105980370	A/G	1	5980370	7.7857e-09
Grain_env1_r1	GLM	QTN-sf0105980512	C/T	1	5980512	2.6819e-09
Grain_env1_r1	GLM	QTN-sf0105980805	C/T	1	5980805	3.7779e-09
Grain_env1_r1	GLM	QTN-sf0105980885	G/A	1	5980885	2.4523e-09
Grain_env1_r1	GLM	QTN-sf0105981240	A/G	1	5981240	1.3791e-08
Grain_env1_r1	GLM	QTN-sf0105981772	A/G	1	5981772	2.0873e-08
Grain_env1_r1	GLM	QTN-sf0105982033	C/T	1	5982033	3.6071e-08
Grain_env1_r1	GLM	QTN-sf0105982155	C/T	1	5982155	5.1121e-09
Grain_env1_r1	GLM	QTN-sf0105982270	C/A	1	5982270	2.251e-08
Grain_env1_r1	GLM	QTN-sf0105984971	C/T	1	5984971	5.646e-09
Grain_env1_r1	GLM	QTN-sf0105985266	G/A	1	5985266	2.6572e-08
Grain_env1_r1	GLM	QTN-sf0105985370	T/C	1	5985370	4.4032e-09
Grain_env1_r1	GLM	QTN-sf0105988835	G/A	1	5988835	4.5765e-09
Grain_env1_r1	GLM	QTN-sf0105989198	C/T	1	5989198	1.2539e-08
Grain_env1_r1	GLM	QTN-sf0105989920	G/A	1	5989920	3.9648e-08
Grain_env1_r1	GLM	QTN-sf0105992333	C/T	1	5992333	1.4416e-07
Grain_env1_r1	GLM	QTN-sf0105992460	A/G	1	5992460	8.7003e-08
Grain_env1_r1	GLM	QTN-sf0105992738	G/A	1	5992738	1.4389e-07
Grain_env1_r1	GLM	QTN-sf0105992841	A/G	1	5992841	7.0182e-08
Grain_env1_r1	GLM	QTN-sf0105993720	A/G	1	5993720	1.691e-07
Grain_env1_r1	GLM	QTN-sf0105994115	C/T	1	5994115	7.7417e-08
Grain_env1_r1	GLM	QTN-sf0105994120	G/A	1	5994120	7.7417e-08
Grain_env1_r1	GLM	QTN-sf0105995638	G/A	1	5995638	2.3715e-07
Grain_env1_r1	GLM	QTN-sf0105996272	G/A	1	5996272	1.9791e-08
Grain_env1_r1	GLM	QTN-sf0106002010	G/A	1	6002010	2.1719e-09
Grain_env1_r1	GLM	QTN-sf0106004190	G/T	1	6004190	3.155e-08
Grain_env1_r1	GLM	QTN-sf0106004702	G/T	1	6004702	2.3436e-08
Grain_env1_r1	GLM	QTN-sf0106004712	C/A	1	6004712	1.9265e-08
Grain_env1_r1	GLM	QTN-sf0106004934	C/A	1	6004934	1.9071e-07
Grain_env1_r1	GLM	QTN-sf0106005010	G/A	1	6005010	1.3837e-08
Grain_env1_r1	GLM	QTN-sf0106005625	G/A	1	6005625	1.0273e-08
Grain_env1_r1	GLM	QTN-sf0106005765	A/C	1	6005765	2.0895e-08
Grain_env1_r1	GLM	QTN-sf0106009845	A/G	1	6009845	4.5207e-09
Grain_env1_r1	GLM	QTN-sf0106009864	T/C	1	6009864	5.5964e-08
Grain_env1_r1	GLM	QTN-sf0106009992	T/G	1	6009992	3.4805e-08
Grain_env1_r1	GLM	QTN-sf0106010219	C/T	1	6010219	2.8926e-08
Grain_env1_r1	GLM	QTN-sf0106010496	T/A	1	6010496	3.0673e-09
Grain_env1_r1	GLM	QTN-sf0106012769	T/C	1	6012769	9.415e-09
Grain_env1_r1	GLM	QTN-sf0106014078	G/A	1	6014078	9.9549e-08
Grain_env1_r1	GLM	QTN-sf0106014322	C/T	1	6014322	3.0933e-08
Grain_env1_r1	GLM	QTN-sf0106014427	G/A	1	6014427	6.2996e-09
Grain_env1_r1	GLM	QTN-sf0106014618	G/A	1	6014618	5.5278e-08
Grain_env1_r1	GLM	QTN-sf0106014956	G/A	1	6014956	5.6026e-08
Grain_env1_r1	GLM	QTN-sf0106015573	G/A	1	6015573	2.0565e-08
Grain_env1_r1	GLM	QTN-sf0106015670	G/A	1	6015670	4.8264e-08
Grain_env1_r1	GLM	QTN-sf0106015934	A/C	1	6015934	8.272e-09
Grain_env1_r1	GLM	QTN-sf0106018599	C/T	1	6018599	1.3677e-08
Grain_env1_r1	GLM	QTN-sf0106020491	G/T	1	6020491	3.9856e-08
Grain_env1_r1	GLM	QTN-sf0106021104	T/G	1	6021104	3.0461e-08
Grain_env1_r1	GLM	QTN-sf0106021784	C/G	1	6021784	1.9316e-07
Grain_env1_r1	GLM	QTN-sf0106021828	A/T	1	6021828	1.3754e-07
Grain_env1_r1	GLM	QTN-sf0106125598	G/A	1	6125598	2.8174e-07
Grain_env1_r1	GLM	QTN-sf0106129299	C/G	1	6129299	6.8364e-08
Grain_env1_r1	GLM	QTN-sf0106429664	T/C	1	6429664	1.4584e-07
Grain_env1_r1	GLM	QTN-sf0106643387	A/C	1	6643387	3.9719e-08
Grain_env1_r1	GLM	QTN-sf0106644573	A/G	1	6644573	2.3449e-08
Grain_env1_r1	GLM	QTN-sf0106644696	A/T	1	6644696	2.3449e-08
Grain_env1_r1	GLM	QTN-sf0106647823	A/G	1	6647823	3.1844e-07
Grain_env1_r1	GLM	QTN-sf0106650556	A/G	1	6650556	9.2839e-08
Grain_env1_r1	GLM	QTN-sf0106678567	C/T	1	6678567	1.1376e-07
Grain_env1_r1	GLM	QTN-sf0106685584	T/C	1	6685584	4.729e-08
Grain_env1_r1	GLM	QTN-sf0113164875	G/T	1	13164875	1.8019e-07
Grain_env1_r1	GLM	QTN-sf0123015577	A/C	1	23015577	2.7258e-07
Grain_env1_r1	GLM	QTN-sf0123100587	A/T	1	23100587	3.0093e-07
Grain_env1_r1	GLM	QTN-sf0131875840	C/T	1	31875840	2.1983e-07
Grain_env1_r1	GLM	QTN-sf0133782359	G/T	1	33782359	1.4393e-07
Grain_env1_r1	GLM	QTN-sf0133782656	T/A	1	33782656	2.7903e-08
Grain_env1_r1	GLM	QTN-sf0140483000	G/A	1	40483000	3.1491e-07
Grain_env1_r1	GLM	QTN-sf0223455409	C/G	2	23455409	2.7719e-07
Grain_env1_r1	GLM	QTN-sf0234993021	T/A	2	34993021	3.1989e-07
Grain_env1_r1	GLM	QTN-sf0234998880	A/G	2	34998880	2.599e-07
Grain_env1_r1	GLM	QTN-sf0235049246	C/G	2	35049246	2.5703e-07
Grain_env1_r1	GLM	QTN-sf0301648936	T/C	3	1648936	9.4744e-09
Grain_env1_r1	GLM	QTN-sf0301649005	T/A	3	1649005	5.0638e-09
Grain_env1_r1	GLM	QTN-sf0301649879	A/G	3	1649879	9.8942e-09
Grain_env1_r1	GLM	QTN-sf0301650102	A/G	3	1650102	2.1596e-08
Grain_env1_r1	GLM	QTN-sf0301651152	T/C	3	1651152	6.1695e-08
Grain_env1_r1	GLM	QTN-sf0301657041	C/G	3	1657041	1.5309e-07
Grain_env1_r1	GLM	QTN-sf0301664705	T/C	3	1664705	4.6565e-08
Grain_env1_r1	GLM	QTN-sf0301664731	C/T	3	1664731	6.3813e-08
Grain_env1_r1	GLM	QTN-sf0301665243	G/A	3	1665243	3.549e-09
Grain_env1_r1	GLM	QTN-sf0301665599	G/A	3	1665599	8.149e-08
Grain_env1_r1	GLM	QTN-sf0301668636	A/G	3	1668636	7.1039e-08
Grain_env1_r1	GLM	QTN-sf0301672071	T/C	3	1672071	2.102e-07
Grain_env1_r1	GLM	QTN-sf0301893031	T/C	3	1893031	1.4073e-07
Grain_env1_r1	GLM	QTN-sf0301893305	C/G	3	1893305	2.9667e-07
Grain_env1_r1	GLM	QTN-sf0301893633	T/C	3	1893633	2.9667e-07
Grain_env1_r1	GLM	QTN-sf0301907906	A/G	3	1907906	2.8316e-07
Grain_env1_r1	GLM	QTN-sf0301933608	C/T	3	1933608	2.9667e-07
Grain_env1_r1	GLM	QTN-sf0301989932	C/G	3	1989932	1.6062e-07
Grain_env1_r1	GLM	QTN-sf0302137645	A/G	3	2137645	1.004e-08
Grain_env1_r1	GLM	QTN-sf0302380413	G/T	3	2380413	2.412e-07
Grain_env1_r1	GLM	QTN-sf0302383616	T/C	3	2383616	9.4631e-08
Grain_env1_r1	GLM	QTN-sf0302400247	T/C	3	2400247	1.5025e-08
Grain_env1_r1	GLM	QTN-sf0302448007	A/C	3	2448007	1.4007e-08
Grain_env1_r1	GLM	QTN-sf0302477027	A/G	3	2477027	2.5561e-07
Grain_env1_r1	GLM	QTN-sf0302508135	T/A	3	2508135	2.4494e-10
Grain_env1_r1	GLM	QTN-sf0302701435	A/G	3	2701435	3.5325e-08
Grain_env1_r1	GLM	QTN-sf0302742426	G/A	3	2742426	1.2791e-07
Grain_env1_r1	GLM	QTN-sf0302742429	G/T	3	2742429	1.2791e-07
Grain_env1_r1	GLM	QTN-sf0302955609	T/C	3	2955609	2.3435e-07
Grain_env1_r1	GLM	QTN-sf0302961330	T/C	3	2961330	1.901e-07
Grain_env1_r1	GLM	QTN-sf0303037969	A/G	3	3037969	1.8271e-07
Grain_env1_r1	GLM	QTN-sf0303274809	A/G	3	3274809	1.7076e-08
Grain_env1_r1	GLM	QTN-sf0303274812	T/G	3	3274812	1.7076e-08
Grain_env1_r1	GLM	QTN-sf0303274824	C/T	3	3274824	1.7076e-08
Grain_env1_r1	GLM	QTN-sf0303276941	C/T	3	3276941	2.3903e-08
Grain_env1_r1	GLM	QTN-sf0303277346	G/T	3	3277346	8.8608e-09
Grain_env1_r1	GLM	QTN-sf0303277558	C/T	3	3277558	2.5441e-08
Grain_env1_r1	GLM	QTN-sf0303277675	A/C	3	3277675	2.0296e-07
Grain_env1_r1	GLM	QTN-sf0303277676	T/G	3	3277676	2.0296e-07
Grain_env1_r1	GLM	QTN-sf0303277731	T/C	3	3277731	1.8739e-08
Grain_env1_r1	GLM	QTN-sf0303277738	C/T	3	3277738	1.8739e-08
Grain_env1_r1	GLM	QTN-sf0303277775	G/A	3	3277775	1.8224e-08
Grain_env1_r1	GLM	QTN-sf0303277855	G/A	3	3277855	2.7255e-09
Grain_env1_r1	GLM	QTN-sf0303277892	A/G	3	3277892	7.1085e-09
Grain_env1_r1	GLM	QTN-sf0303277926	C/T	3	3277926	5.7652e-10
Grain_env1_r1	GLM	QTN-sf0303277986	T/C	3	3277986	1.9017e-08
Grain_env1_r1	GLM	QTN-sf0303278567	A/T	3	3278567	2.2393e-08
Grain_env1_r1	GLM	QTN-sf0303278596	T/C	3	3278596	3.2744e-08
Grain_env1_r1	GLM	QTN-sf0303278619	C/G	3	3278619	6.9523e-09
Grain_env1_r1	GLM	QTN-sf0303278636	A/G	3	3278636	6.9523e-09
Grain_env1_r1	GLM	QTN-sf0303278638	G/A	3	3278638	6.9523e-09
Grain_env1_r1	GLM	QTN-sf0303278660	G/A	3	3278660	7.6783e-09
Grain_env1_r1	GLM	QTN-sf0303278664	G/A	3	3278664	7.6783e-09
Grain_env1_r1	GLM	QTN-sf0303278683	C/T	3	3278683	8.806e-09
Grain_env1_r1	GLM	QTN-sf0303278813	G/A	3	3278813	2.0311e-08
Grain_env1_r1	GLM	QTN-sf0303278910	G/T	3	3278910	1.7599e-08
Grain_env1_r1	GLM	QTN-sf0303279439	T/C	3	3279439	3.5527e-08
Grain_env1_r1	GLM	QTN-sf0303279865	T/G	3	3279865	7.6529e-09
Grain_env1_r1	GLM	QTN-sf0303280152	C/T	3	3280152	2.5394e-08
Grain_env1_r1	GLM	QTN-sf0303280687	C/T	3	3280687	1.2354e-07
Grain_env1_r1	GLM	QTN-sf0303280708	C/G	3	3280708	1.8521e-08
Grain_env1_r1	GLM	QTN-sf0303281843	C/A	3	3281843	1.8319e-08
Grain_env1_r1	GLM	QTN-sf0303281857	C/T	3	3281857	2.1991e-08
Grain_env1_r1	GLM	QTN-sf0303281921	A/T	3	3281921	3.5658e-08
Grain_env1_r1	GLM	QTN-sf0303281961	C/T	3	3281961	1.9783e-07
Grain_env1_r1	GLM	QTN-sf0303282753	G/T	3	3282753	5.0001e-10
Grain_env1_r1	GLM	QTN-sf0303282903	C/A	3	3282903	2.2802e-08
Grain_env1_r1	GLM	QTN-sf0303282958	T/C	3	3282958	5.3985e-08
Grain_env1_r1	GLM	QTN-sf0303283211	A/T	3	3283211	2.5922e-08
Grain_env1_r1	GLM	QTN-sf0303283278	A/G	3	3283278	1.6901e-08
Grain_env1_r1	GLM	QTN-sf0303284413	C/G	3	3284413	1.5751e-08
Grain_env1_r1	GLM	QTN-sf0303284597	T/G	3	3284597	1.8455e-09
Grain_env1_r1	GLM	QTN-sf0303284641	C/T	3	3284641	3.226e-08
Grain_env1_r1	GLM	QTN-sf0303284691	G/A	3	3284691	1.185e-08
Grain_env1_r1	GLM	QTN-sf0303284751	T/A	3	3284751	2.5231e-08
Grain_env1_r1	GLM	QTN-sf0303286020	G/A	3	3286020	6.4504e-09
Grain_env1_r1	GLM	QTN-sf0303286051	C/T	3	3286051	1.3005e-08
Grain_env1_r1	GLM	QTN-sf0303286884	G/T	3	3286884	5.4612e-09
Grain_env1_r1	GLM	QTN-sf0303286904	C/T	3	3286904	5.4612e-09
Grain_env1_r1	GLM	QTN-sf0303286912	G/A	3	3286912	5.4612e-09
Grain_env1_r1	GLM	QTN-sf0303286982	A/G	3	3286982	5.4612e-09
Grain_env1_r1	GLM	QTN-sf0303287119	C/T	3	3287119	5.4612e-09
Grain_env1_r1	GLM	QTN-sf0303287951	C/T	3	3287951	4.3401e-09
Grain_env1_r1	GLM	QTN-sf0303287963	C/T	3	3287963	4.3401e-09
Grain_env1_r1	GLM	QTN-sf0303288006	C/T	3	3288006	4.3401e-09
Grain_env1_r1	GLM	QTN-sf0303288009	C/T	3	3288009	4.3401e-09
Grain_env1_r1	GLM	QTN-sf0303288061	G/A	3	3288061	4.3401e-09
Grain_env1_r1	GLM	QTN-sf0303288079	A/G	3	3288079	2.8249e-09
Grain_env1_r1	GLM	QTN-sf0303288102	A/T	3	3288102	2.8249e-09
Grain_env1_r1	GLM	QTN-sf0303288134	T/C	3	3288134	3.3781e-10
Grain_env1_r1	GLM	QTN-sf0303288194	A/G	3	3288194	2.1451e-09
Grain_env1_r1	GLM	QTN-sf0303288219	A/G	3	3288219	2.1451e-09
Grain_env1_r1	GLM	QTN-sf0303288237	T/C	3	3288237	9.4031e-08
Grain_env1_r1	GLM	QTN-sf0303288298	G/A	3	3288298	1.9758e-08
Grain_env1_r1	GLM	QTN-sf0303288322	G/A	3	3288322	2.3724e-08
Grain_env1_r1	GLM	QTN-sf0303288362	T/C	3	3288362	1.2585e-08
Grain_env1_r1	GLM	QTN-sf0303288786	A/T	3	3288786	6.4556e-09
Grain_env1_r1	GLM	QTN-sf0303288787	C/G	3	3288787	6.4556e-09
Grain_env1_r1	GLM	QTN-sf0303288788	C/T	3	3288788	3.9776e-09
Grain_env1_r1	GLM	QTN-sf0303290808	G/A	3	3290808	1.6519e-07
Grain_env1_r1	GLM	QTN-sf0303291263	A/G	3	3291263	1.3234e-07
Grain_env1_r1	GLM	QTN-sf0303291709	G/A	3	3291709	3.3976e-08
Grain_env1_r1	GLM	QTN-sf0303294115	C/T	3	3294115	6.8936e-09
Grain_env1_r1	GLM	QTN-sf0303294156	C/A	3	3294156	6.8936e-09
Grain_env1_r1	GLM	QTN-sf0303294776	T/C	3	3294776	5.0683e-09
Grain_env1_r1	GLM	QTN-sf0303307495	G/T	3	3307495	6.0657e-08
Grain_env1_r1	GLM	QTN-sf0303307728	T/G	3	3307728	3.5516e-08
Grain_env1_r1	GLM	QTN-sf0303307787	A/G	3	3307787	3.0436e-07
Grain_env1_r1	GLM	QTN-sf0303308377	T/C	3	3308377	2.0626e-07
Grain_env1_r1	GLM	QTN-sf0303308389	C/T	3	3308389	1.4955e-08
Grain_env1_r1	GLM	QTN-sf0303308416	C/T	3	3308416	4.6495e-08
Grain_env1_r1	GLM	QTN-sf0303308449	C/T	3	3308449	1.3607e-08
Grain_env1_r1	GLM	QTN-sf0303308526	C/G	3	3308526	1.2162e-08
Grain_env1_r1	GLM	QTN-sf0303308593	A/G	3	3308593	1.6366e-08
Grain_env1_r1	GLM	QTN-sf0303308601	T/C	3	3308601	6.3638e-09
Grain_env1_r1	GLM	QTN-sf0303308837	G/T	3	3308837	1.0878e-08
Grain_env1_r1	GLM	QTN-sf0303308885	T/C	3	3308885	1.6741e-08
Grain_env1_r1	GLM	QTN-sf0303309124	A/G	3	3309124	1.2329e-08
Grain_env1_r1	GLM	QTN-sf0303309815	G/A	3	3309815	1.6366e-08
Grain_env1_r1	GLM	QTN-sf0303310690	T/G	3	3310690	1.2082e-07
Grain_env1_r1	GLM	QTN-sf0303310803	G/A	3	3310803	1.2082e-07
Grain_env1_r1	GLM	QTN-sf0303310966	C/T	3	3310966	1.2082e-07
Grain_env1_r1	GLM	QTN-sf0303310994	C/T	3	3310994	1.2082e-07
Grain_env1_r1	GLM	QTN-sf0303311092	G/T	3	3311092	2.7638e-08
Grain_env1_r1	GLM	QTN-sf0303311171	C/T	3	3311171	3.7775e-08
Grain_env1_r1	GLM	QTN-sf0303311588	G/C	3	3311588	2.1601e-08
Grain_env1_r1	GLM	QTN-sf0303311589	G/C	3	3311589	2.1601e-08
Grain_env1_r1	GLM	QTN-sf0303311936	T/C	3	3311936	1.8579e-10
Grain_env1_r1	GLM	QTN-sf0303311948	G/A	3	3311948	2.0897e-08
Grain_env1_r1	GLM	QTN-sf0303312210	C/T	3	3312210	2.305e-09
Grain_env1_r1	GLM	QTN-sf0303312481	A/G	3	3312481	1.1935e-09
Grain_env1_r1	GLM	QTN-sf0303312778	A/C	3	3312778	6.1923e-09
Grain_env1_r1	GLM	QTN-sf0303312998	A/T	3	3312998	2.1553e-08
Grain_env1_r1	GLM	QTN-sf0303313068	C/T	3	3313068	1.7398e-07
Grain_env1_r1	GLM	QTN-sf0303313078	T/C	3	3313078	3.3569e-09
Grain_env1_r1	GLM	QTN-sf0303313123	G/A	3	3313123	5.7114e-09
Grain_env1_r1	GLM	QTN-sf0303313218	T/A	3	3313218	1.9332e-07
Grain_env1_r1	GLM	QTN-sf0303313370	T/C	3	3313370	4.5974e-09
Grain_env1_r1	GLM	QTN-sf0303313377	A/G	3	3313377	8.8902e-09
Grain_env1_r1	GLM	QTN-sf0303313414	C/T	3	3313414	3.3569e-09
Grain_env1_r1	GLM	QTN-sf0303313460	C/T	3	3313460	1.7398e-07
Grain_env1_r1	GLM	QTN-sf0303313546	G/A	3	3313546	1.8275e-07
Grain_env1_r1	GLM	QTN-sf0303313999	T/C	3	3313999	1.1397e-08
Grain_env1_r1	GLM	QTN-sf0303314016	A/G	3	3314016	1.1397e-08
Grain_env1_r1	GLM	QTN-sf0303314692	G/A	3	3314692	2.7139e-07
Grain_env1_r1	GLM	QTN-sf0303314705	G/A	3	3314705	2.7139e-07
Grain_env1_r1	GLM	QTN-sf0303314933	G/T	3	3314933	1.6994e-07
Grain_env1_r1	GLM	QTN-sf0303317540	G/T	3	3317540	4.1515e-08
Grain_env1_r1	GLM	QTN-sf0303319755	T/C	3	3319755	1.1787e-07
Grain_env1_r1	GLM	QTN-sf0303321485	A/C	3	3321485	1.3566e-07
Grain_env1_r1	GLM	QTN-sf0303328972	A/C	3	3328972	7.914e-08
Grain_env1_r1	GLM	QTN-sf0303331020	G/A	3	3331020	1.3996e-07
Grain_env1_r1	GLM	QTN-sf0303331036	G/A	3	3331036	2.5695e-07
Grain_env1_r1	GLM	QTN-sf0303331124	G/A	3	3331124	2.8668e-07
Grain_env1_r1	GLM	QTN-sf0303332587	G/A	3	3332587	1.4118e-07
Grain_env1_r1	GLM	QTN-sf0303333264	A/G	3	3333264	2.7513e-07
Grain_env1_r1	GLM	QTN-sf0303333276	T/G	3	3333276	2.7513e-07
Grain_env1_r1	GLM	QTN-sf0303333636	T/G	3	3333636	1.7488e-07
Grain_env1_r1	GLM	QTN-sf0303333675	G/A	3	3333675	1.7488e-07
Grain_env1_r1	GLM	QTN-sf0303334794	C/A	3	3334794	2.9933e-07
Grain_env1_r1	GLM	QTN-sf0303334836	C/T	3	3334836	1.4118e-07
Grain_env1_r1	GLM	QTN-sf0303334842	T/C	3	3334842	2.7513e-07
Grain_env1_r1	GLM	QTN-sf0303335142	C/T	3	3335142	1.4118e-07
Grain_env1_r1	GLM	QTN-sf0303335506	A/G	3	3335506	1.4218e-07
Grain_env1_r1	GLM	QTN-sf0303335512	T/C	3	3335512	1.4218e-07
Grain_env1_r1	GLM	QTN-sf0303335532	C/G	3	3335532	2.7513e-07
Grain_env1_r1	GLM	QTN-sf0303336749	G/T	3	3336749	1.126e-07
Grain_env1_r1	GLM	QTN-sf0303341753	A/G	3	3341753	2.7513e-07
Grain_env1_r1	GLM	QTN-sf0303342710	C/T	3	3342710	2.0816e-07
Grain_env1_r1	GLM	QTN-sf0303344356	A/G	3	3344356	7.0881e-08
Grain_env1_r1	GLM	QTN-sf0303345302	G/A	3	3345302	2.6657e-07
Grain_env1_r1	GLM	QTN-sf0303345311	C/T	3	3345311	2.237e-07
Grain_env1_r1	GLM	QTN-sf0303345716	G/A	3	3345716	3.0774e-07
Grain_env1_r1	GLM	QTN-sf0303348119	T/C	3	3348119	2.3259e-08
Grain_env1_r1	GLM	QTN-sf0303348377	G/A	3	3348377	2.2857e-07
Grain_env1_r1	GLM	QTN-sf0303353290	T/A	3	3353290	1.9725e-07
Grain_env1_r1	GLM	QTN-sf0303356581	C/A	3	3356581	3.1175e-07
Grain_env1_r1	GLM	QTN-sf0303357146	G/C	3	3357146	2.9442e-07
Grain_env1_r1	GLM	QTN-sf0303361344	C/A	3	3361344	1.2942e-07
Grain_env1_r1	GLM	QTN-sf0303459064	C/T	3	3459064	1.9333e-07
Grain_env1_r1	GLM	QTN-sf0303477871	G/A	3	3477871	3.1487e-07
Grain_env1_r1	GLM	QTN-sf0303481041	T/A	3	3481041	1.2736e-07
Grain_env1_r1	GLM	QTN-sf0303481068	G/C	3	3481068	2.3327e-07
Grain_env1_r1	GLM	QTN-sf0303483023	A/G	3	3483023	9.552e-08
Grain_env1_r1	GLM	QTN-sf0308686822	A/G	3	8686822	1.7703e-07
Grain_env1_r1	GLM	QTN-sf0308688529	A/C	3	8688529	2.7208e-08
Grain_env1_r1	GLM	QTN-sf0308689874	A/G	3	8689874	6.9602e-08
Grain_env1_r1	GLM	QTN-sf0308691065	T/C	3	8691065	5.1222e-08
Grain_env1_r1	GLM	QTN-sf0308694752	A/G	3	8694752	9.208e-08
Grain_env1_r1	GLM	QTN-sf0308696202	T/C	3	8696202	4.4343e-08
Grain_env1_r1	GLM	QTN-sf0308696717	A/C	3	8696717	2.3539e-07
Grain_env1_r1	GLM	QTN-sf0308696867	A/T	3	8696867	6.6385e-08
Grain_env1_r1	GLM	QTN-sf0308697712	T/C	3	8697712	7.99e-08
Grain_env1_r1	GLM	QTN-sf0308708362	G/A	3	8708362	3.0937e-07
Grain_env1_r1	GLM	QTN-sf0308713139	T/G	3	8713139	2.866e-07
Grain_env1_r1	GLM	QTN-sf0308713792	A/G	3	8713792	1.8701e-08
Grain_env1_r1	GLM	QTN-sf0308713871	C/T	3	8713871	1.2283e-07
Grain_env1_r1	GLM	QTN-sf0308713959	T/C	3	8713959	7.99e-08
Grain_env1_r1	GLM	QTN-sf0308713976	A/T	3	8713976	7.99e-08
Grain_env1_r1	GLM	QTN-sf0308715555	G/A	3	8715555	6.6323e-09
Grain_env1_r1	GLM	QTN-sf0308717138	A/C	3	8717138	3.1e-07
Grain_env1_r1	GLM	QTN-sf0308717146	G/A	3	8717146	2.9737e-07
Grain_env1_r1	GLM	QTN-sf0308718933	T/A	3	8718933	7.99e-08
Grain_env1_r1	GLM	QTN-sf0308719507	C/A	3	8719507	1.3985e-07
Grain_env1_r1	GLM	QTN-sf0308719622	C/G	3	8719622	2.15e-07
Grain_env1_r1	GLM	QTN-sf0308720597	T/G	3	8720597	2.3539e-07
Grain_env1_r1	GLM	QTN-sf0308722798	T/C	3	8722798	2.043e-07
Grain_env1_r1	GLM	QTN-sf0313216596	G/A	3	13216596	2.5666e-07
Grain_env1_r1	GLM	QTN-sf0313233676	C/T	3	13233676	1.1608e-07
Grain_env1_r1	GLM	QTN-sf0316353176	A/G	3	16353176	1.0825e-09
Grain_env1_r1	GLM	QTN-sf0316415578	T/C	3	16415578	1.7956e-07
Grain_env1_r1	GLM	QTN-sf0316437653	T/C	3	16437653	2.8794e-07
Grain_env1_r1	GLM	QTN-sf0316445044	G/T	3	16445044	1.9895e-07
Grain_env1_r1	GLM	QTN-sf0316478459	T/C	3	16478459	3.1204e-07
Grain_env1_r1	GLM	QTN-sf0316587445	G/A	3	16587445	1.1415e-07
Grain_env1_r1	GLM	QTN-sf0316588563	A/G	3	16588563	2.6754e-07
Grain_env1_r1	GLM	QTN-sf0316588601	T/G	3	16588601	2.2953e-07
Grain_env1_r1	GLM	QTN-sf0316588689	G/A	3	16588689	2.6882e-07
Grain_env1_r1	GLM	QTN-sf0316588701	C/T	3	16588701	1.1748e-07
Grain_env1_r1	GLM	QTN-sf0319968166	A/G	3	19968166	3.9755e-08
Grain_env1_r1	GLM	QTN-sf0328511118	G/A	3	28511118	1.5898e-07
Grain_env1_r1	GLM	QTN-sf0328511153	G/A	3	28511153	1.5898e-07
Grain_env1_r1	GLM	QTN-sf0328511454	G/A	3	28511454	1.5651e-07
Grain_env1_r1	GLM	QTN-sf0328513687	C/T	3	28513687	1.4262e-07
Grain_env1_r1	GLM	QTN-sf0328513699	G/T	3	28513699	1.4262e-07
Grain_env1_r1	GLM	QTN-sf0328514855	C/T	3	28514855	7.5909e-08
Grain_env1_r1	GLM	QTN-sf0328515034	G/T	3	28515034	3.1921e-07
Grain_env1_r1	GLM	QTN-sf0328515269	C/A	3	28515269	7.5909e-08
Grain_env1_r1	GLM	QTN-sf0328529117	A/G	3	28529117	2.3133e-07
Grain_env1_r1	GLM	QTN-sf0328538160	C/A	3	28538160	3.1385e-07
Grain_env1_r1	GLM	QTN-sf0328538605	C/T	3	28538605	3.0166e-07
Grain_env1_r1	GLM	QTN-sf0328586926	C/A	3	28586926	2.6497e-07
Grain_env1_r1	GLM	QTN-sf0328590149	C/T	3	28590149	9.2565e-08
Grain_env1_r1	GLM	QTN-sf0328590935	G/A	3	28590935	2.5059e-07
Grain_env1_r1	GLM	QTN-sf0328591057	A/G	3	28591057	1.8756e-07
Grain_env1_r1	GLM	QTN-sf0328876062	T/G	3	28876062	1.4306e-07
Grain_env1_r1	GLM	QTN-sf0328879699	C/T	3	28879699	1.4306e-07
Grain_env1_r1	GLM	QTN-sf0334872172	C/T	3	34872172	1.348e-07
Grain_env1_r1	GLM	QTN-sf0334885410	T/G	3	34885410	3.9693e-08
Grain_env1_r1	GLM	QTN-sf0335844972	C/T	3	35844972	1.7873e-07
Grain_env1_r1	GLM	QTN-sf0404355818	A/G	4	4355818	1.9996e-07
Grain_env1_r1	GLM	QTN-sf0404356858	A/G	4	4356858	1.1139e-07
Grain_env1_r1	GLM	QTN-sf0404356888	A/C	4	4356888	1.1139e-07
Grain_env1_r1	GLM	QTN-sf0404356890	T/A	4	4356890	1.1139e-07
Grain_env1_r1	GLM	QTN-sf0405784494	G/C	4	5784494	2.3843e-07
Grain_env1_r1	GLM	QTN-sf0405785440	A/G	4	5785440	2.7983e-07
Grain_env1_r1	GLM	QTN-sf0405789192	A/G	4	5789192	2.9289e-07
Grain_env1_r1	GLM	QTN-sf0405801995	T/C	4	5801995	3.0175e-07
Grain_env1_r1	GLM	QTN-sf0405803054	T/G	4	5803054	2.9854e-07
Grain_env1_r1	GLM	QTN-sf0405808835	T/A	4	5808835	7.5495e-08
Grain_env1_r1	GLM	QTN-sf0405809319	A/T	4	5809319	8.7564e-08
Grain_env1_r1	GLM	QTN-sf0405809791	T/A	4	5809791	4.872e-08
Grain_env1_r1	GLM	QTN-sf0405810132	T/A	4	5810132	1.3606e-07
Grain_env1_r1	GLM	QTN-sf0405812240	C/G	4	5812240	2.2554e-07
Grain_env1_r1	GLM	QTN-sf0405813103	T/C	4	5813103	2.6096e-07
Grain_env1_r1	GLM	QTN-sf0405813455	A/G	4	5813455	1.8957e-08
Grain_env1_r1	GLM	QTN-sf0405814097	T/C	4	5814097	1.0364e-07
Grain_env1_r1	GLM	QTN-sf0405814522	A/G	4	5814522	1.405e-08
Grain_env1_r1	GLM	QTN-sf0405814526	T/C	4	5814526	1.405e-08
Grain_env1_r1	GLM	QTN-sf0405814819	A/G	4	5814819	2.8669e-08
Grain_env1_r1	GLM	QTN-sf0405814826	T/C	4	5814826	2.8669e-08
Grain_env1_r1	GLM	QTN-sf0405814905	A/G	4	5814905	3.1454e-07
Grain_env1_r1	GLM	QTN-sf0405815391	T/C	4	5815391	2.3653e-08
Grain_env1_r1	GLM	QTN-sf0405816595	A/C	4	5816595	1.0506e-07
Grain_env1_r1	GLM	QTN-sf0405816657	T/C	4	5816657	2.3973e-07
Grain_env1_r1	GLM	QTN-sf0405816823	G/A	4	5816823	1.5725e-07
Grain_env1_r1	GLM	QTN-sf0405817139	G/A	4	5817139	1.2693e-07
Grain_env1_r1	GLM	QTN-sf0405817699	T/C	4	5817699	9.076e-09
Grain_env1_r1	GLM	QTN-sf0405817929	T/C	4	5817929	1.8044e-07
Grain_env1_r1	GLM	QTN-sf0405818318	A/G	4	5818318	7.2367e-08
Grain_env1_r1	GLM	QTN-sf0405818687	T/G	4	5818687	8.1723e-08
Grain_env1_r1	GLM	QTN-sf0405819193	A/G	4	5819193	6.6637e-08
Grain_env1_r1	GLM	QTN-sf0405820387	C/G	4	5820387	1.4123e-07
Grain_env1_r1	GLM	QTN-sf0405821071	T/C	4	5821071	1.3264e-07
Grain_env1_r1	GLM	QTN-sf0405821592	A/T	4	5821592	7.7957e-08
Grain_env1_r1	GLM	QTN-sf0405821883	C/G	4	5821883	8.3014e-08
Grain_env1_r1	GLM	QTN-sf0405822673	A/G	4	5822673	6.2854e-09
Grain_env1_r1	GLM	QTN-sf0405822843	T/C	4	5822843	2.7241e-09
Grain_env1_r1	GLM	QTN-sf0405822845	G/C	4	5822845	2.7241e-09
Grain_env1_r1	GLM	QTN-sf0405830637	A/G	4	5830637	2.3062e-07
Grain_env1_r1	GLM	QTN-sf0405831056	A/G	4	5831056	1.9433e-08
Grain_env1_r1	GLM	QTN-sf0405831488	A/T	4	5831488	1.819e-07
Grain_env1_r1	GLM	QTN-sf0405831798	A/G	4	5831798	3.2318e-08
Grain_env1_r1	GLM	QTN-sf0405832181	T/C	4	5832181	4.6382e-10
Grain_env1_r1	GLM	QTN-sf0405834070	T/C	4	5834070	1.5415e-07
Grain_env1_r1	GLM	QTN-sf0405835426	A/G	4	5835426	7.2846e-08
Grain_env1_r1	GLM	QTN-sf0405835664	C/G	4	5835664	2.8572e-07
Grain_env1_r1	GLM	QTN-sf0405837340	A/G	4	5837340	1.4084e-08
Grain_env1_r1	GLM	QTN-sf0405837931	A/G	4	5837931	1.0501e-08
Grain_env1_r1	GLM	QTN-sf0405839959	A/G	4	5839959	1.2907e-07
Grain_env1_r1	GLM	QTN-sf0405841781	A/T	4	5841781	1.1005e-07
Grain_env1_r1	GLM	QTN-sf0405842987	T/C	4	5842987	4.6449e-08
Grain_env1_r1	GLM	QTN-sf0405843125	T/C	4	5843125	6.6209e-09
Grain_env1_r1	GLM	QTN-sf0405844286	T/C	4	5844286	4.937e-08
Grain_env1_r1	GLM	QTN-sf0405844679	T/C	4	5844679	9.2395e-08
Grain_env1_r1	GLM	QTN-sf0405845715	C/T	4	5845715	7.322e-08
Grain_env1_r1	GLM	QTN-sf0405851115	G/C	4	5851115	1.2085e-07
Grain_env1_r1	GLM	QTN-sf0405855241	T/C	4	5855241	2.284e-07
Grain_env1_r1	GLM	QTN-sf0405856072	T/C	4	5856072	2.1262e-07
Grain_env1_r1	GLM	QTN-sf0405856261	T/C	4	5856261	2.4062e-07
Grain_env1_r1	GLM	QTN-sf0405856963	A/G	4	5856963	3.3992e-08
Grain_env1_r1	GLM	QTN-sf0405857032	T/C	4	5857032	3.0264e-08
Grain_env1_r1	GLM	QTN-sf0405857489	G/A	4	5857489	4.6248e-08
Grain_env1_r1	GLM	QTN-sf0405858088	T/A	4	5858088	2.2416e-07
Grain_env1_r1	GLM	QTN-sf0405858300	A/G	4	5858300	2.7468e-07
Grain_env1_r1	GLM	QTN-sf0405858614	C/T	4	5858614	1.2448e-07
Grain_env1_r1	GLM	QTN-sf0405858654	A/G	4	5858654	1.2448e-07
Grain_env1_r1	GLM	QTN-sf0405858870	A/G	4	5858870	2.0233e-07
Grain_env1_r1	GLM	QTN-sf0405859254	A/G	4	5859254	5.2766e-08
Grain_env1_r1	GLM	QTN-sf0405859440	T/C	4	5859440	1.6984e-07
Grain_env1_r1	GLM	QTN-sf0405861662	T/A	4	5861662	1.1579e-07
Grain_env1_r1	GLM	QTN-sf0405863235	C/G	4	5863235	3.5981e-08
Grain_env1_r1	GLM	QTN-sf0405863526	T/C	4	5863526	1.2265e-08
Grain_env1_r1	GLM	QTN-sf0405863880	T/C	4	5863880	2.1742e-07
Grain_env1_r1	GLM	QTN-sf0405865243	C/T	4	5865243	2.014e-07
Grain_env1_r1	GLM	QTN-sf0405870591	T/C	4	5870591	2.303e-07
Grain_env1_r1	GLM	QTN-sf0405872099	A/G	4	5872099	8.3221e-08
Grain_env1_r1	GLM	QTN-sf0405872265	T/C	4	5872265	1.114e-07
Grain_env1_r1	GLM	QTN-sf0405872731	G/A	4	5872731	1.0772e-07
Grain_env1_r1	GLM	QTN-sf0405908567	G/A	4	5908567	7.5628e-08
Grain_env1_r1	GLM	QTN-sf0405908981	T/C	4	5908981	1.7164e-07
Grain_env1_r1	GLM	QTN-sf0405909589	C/G	4	5909589	1.1419e-07
Grain_env1_r1	GLM	QTN-sf0405910413	T/C	4	5910413	7.0623e-08
Grain_env1_r1	GLM	QTN-sf0405910517	A/G	4	5910517	1.1505e-07
Grain_env1_r1	GLM	QTN-sf0405911232	T/C	4	5911232	4.3516e-08
Grain_env1_r1	GLM	QTN-sf0405912668	G/A	4	5912668	1.4371e-07
Grain_env1_r1	GLM	QTN-sf0405912837	A/G	4	5912837	4.497e-08
Grain_env1_r1	GLM	QTN-sf0405913093	T/A	4	5913093	1.1884e-07
Grain_env1_r1	GLM	QTN-sf0405913244	C/T	4	5913244	2.4188e-08
Grain_env1_r1	GLM	QTN-sf0405913301	A/G	4	5913301	2.5634e-08
Grain_env1_r1	GLM	QTN-sf0405913499	A/T	4	5913499	2.1883e-07
Grain_env1_r1	GLM	QTN-sf0405913515	A/G	4	5913515	1.6898e-07
Grain_env1_r1	GLM	QTN-sf0405913647	T/C	4	5913647	1.5371e-07
Grain_env1_r1	GLM	QTN-sf0405913968	A/C	4	5913968	1.1387e-07
Grain_env1_r1	GLM	QTN-sf0405913969	T/C	4	5913969	1.1387e-07
Grain_env1_r1	GLM	QTN-sf0405913971	A/C	4	5913971	1.1387e-07
Grain_env1_r1	GLM	QTN-sf0405914038	A/T	4	5914038	4.4649e-08
Grain_env1_r1	GLM	QTN-sf0405914468	T/G	4	5914468	5.732e-08
Grain_env1_r1	GLM	QTN-sf0405914479	A/T	4	5914479	1.7442e-08
Grain_env1_r1	GLM	QTN-sf0405914514	T/C	4	5914514	9.8884e-08
Grain_env1_r1	GLM	QTN-sf0405915106	G/A	4	5915106	8.8927e-08
Grain_env1_r1	GLM	QTN-sf0405915443	A/G	4	5915443	2.7129e-07
Grain_env1_r1	GLM	QTN-sf0405915669	T/C	4	5915669	1.1708e-07
Grain_env1_r1	GLM	QTN-sf0405916010	A/G	4	5916010	3.5409e-08
Grain_env1_r1	GLM	QTN-sf0405916045	A/G	4	5916045	5.1319e-08
Grain_env1_r1	GLM	QTN-sf0405916063	T/C	4	5916063	5.1319e-08
Grain_env1_r1	GLM	QTN-sf0405916103	A/G	4	5916103	4.2475e-08
Grain_env1_r1	GLM	QTN-sf0405916384	G/C	4	5916384	8.0915e-08
Grain_env1_r1	GLM	QTN-sf0405916599	T/C	4	5916599	5.5549e-08
Grain_env1_r1	GLM	QTN-sf0405916764	A/G	4	5916764	1.4419e-07
Grain_env1_r1	GLM	QTN-sf0405916786	T/C	4	5916786	5.7792e-08
Grain_env1_r1	GLM	QTN-sf0405916839	T/A	4	5916839	6.5776e-08
Grain_env1_r1	GLM	QTN-sf0405917038	A/G	4	5917038	1.8458e-08
Grain_env1_r1	GLM	QTN-sf0405917673	A/G	4	5917673	4.5651e-08
Grain_env1_r1	GLM	QTN-sf0405918128	T/A	4	5918128	5.7792e-08
Grain_env1_r1	GLM	QTN-sf0405919239	A/C	4	5919239	6.4331e-08
Grain_env1_r1	GLM	QTN-sf0405920325	G/T	4	5920325	5.6537e-08
Grain_env1_r1	GLM	QTN-sf0405920637	T/C	4	5920637	1.0492e-08
Grain_env1_r1	GLM	QTN-sf0405920663	T/C	4	5920663	1.538e-07
Grain_env1_r1	GLM	QTN-sf0405921286	G/A	4	5921286	1.8743e-07
Grain_env1_r1	GLM	QTN-sf0405921304	A/G	4	5921304	5.3632e-08
Grain_env1_r1	GLM	QTN-sf0405921362	A/C	4	5921362	1.6e-07
Grain_env1_r1	GLM	QTN-sf0405921993	G/A	4	5921993	1.0972e-07
Grain_env1_r1	GLM	QTN-sf0405922068	A/G	4	5922068	3.5981e-08
Grain_env1_r1	GLM	QTN-sf0405922267	G/A	4	5922267	3.5981e-08
Grain_env1_r1	GLM	QTN-sf0405923043	T/C	4	5923043	1.0604e-08
Grain_env1_r1	GLM	QTN-sf0405923939	T/C	4	5923939	1.5229e-07
Grain_env1_r1	GLM	QTN-sf0405924689	G/C	4	5924689	1.9646e-07
Grain_env1_r1	GLM	QTN-sf0405925177	T/C	4	5925177	3.3617e-08
Grain_env1_r1	GLM	QTN-sf0405925589	A/G	4	5925589	5.7476e-08
Grain_env1_r1	GLM	QTN-sf0405925709	A/G	4	5925709	3.7046e-08
Grain_env1_r1	GLM	QTN-sf0405926137	T/C	4	5926137	1.2821e-07
Grain_env1_r1	GLM	QTN-sf0405927215	G/T	4	5927215	2.1969e-07
Grain_env1_r1	GLM	QTN-sf0405927246	A/G	4	5927246	7.6382e-08
Grain_env1_r1	GLM	QTN-sf0405927262	C/T	4	5927262	1.1168e-07
Grain_env1_r1	GLM	QTN-sf0405927604	A/G	4	5927604	2.1456e-07
Grain_env1_r1	GLM	QTN-sf0405927895	A/G	4	5927895	2.478e-07
Grain_env1_r1	GLM	QTN-sf0405928366	A/G	4	5928366	6.1533e-08
Grain_env1_r1	GLM	QTN-sf0405928620	A/G	4	5928620	2.0986e-08
Grain_env1_r1	GLM	QTN-sf0405928656	G/A	4	5928656	6.5039e-08
Grain_env1_r1	GLM	QTN-sf0405928691	C/G	4	5928691	3.6931e-08
Grain_env1_r1	GLM	QTN-sf0405928699	A/G	4	5928699	1.1829e-07
Grain_env1_r1	GLM	QTN-sf0405928737	A/G	4	5928737	2.0496e-08
Grain_env1_r1	GLM	QTN-sf0405929202	T/C	4	5929202	8.4964e-08
Grain_env1_r1	GLM	QTN-sf0405929388	T/C	4	5929388	3.7758e-08
Grain_env1_r1	GLM	QTN-sf0405929396	T/A	4	5929396	2.7321e-08
Grain_env1_r1	GLM	QTN-sf0405929403	A/G	4	5929403	3.7758e-08
Grain_env1_r1	GLM	QTN-sf0405929481	A/G	4	5929481	6.4872e-08
Grain_env1_r1	GLM	QTN-sf0405929530	C/T	4	5929530	4.8883e-08
Grain_env1_r1	GLM	QTN-sf0405929531	A/G	4	5929531	6.1556e-08
Grain_env1_r1	GLM	QTN-sf0405930014	A/G	4	5930014	1.9612e-07
Grain_env1_r1	GLM	QTN-sf0405930613	A/T	4	5930613	1.9498e-07
Grain_env1_r1	GLM	QTN-sf0405946475	T/A	4	5946475	1.6811e-08
Grain_env1_r1	GLM	QTN-sf0405947349	A/G	4	5947349	7.2834e-08
Grain_env1_r1	GLM	QTN-sf0405950247	A/G	4	5950247	1.976e-07
Grain_env1_r1	GLM	QTN-sf0405950847	T/C	4	5950847	1.0003e-07
Grain_env1_r1	GLM	QTN-sf0405951006	A/G	4	5951006	1.0402e-07
Grain_env1_r1	GLM	QTN-sf0405963282	A/C	4	5963282	8.8218e-08
Grain_env1_r1	GLM	QTN-sf0405966185	T/A	4	5966185	2.3699e-07
Grain_env1_r1	GLM	QTN-sf0405967079	G/A	4	5967079	1.6123e-07
Grain_env1_r1	GLM	QTN-sf0405967503	T/A	4	5967503	4.7704e-08
Grain_env1_r1	GLM	QTN-sf0405967989	A/G	4	5967989	1.0825e-07
Grain_env1_r1	GLM	QTN-sf0405968450	G/C	4	5968450	1.8186e-07
Grain_env1_r1	GLM	QTN-sf0405968629	T/G	4	5968629	1.6483e-07
Grain_env1_r1	GLM	QTN-sf0405969275	A/T	4	5969275	3.8628e-08
Grain_env1_r1	GLM	QTN-sf0405969404	A/C	4	5969404	2.0938e-07
Grain_env1_r1	GLM	QTN-sf0405969545	T/C	4	5969545	1.7257e-07
Grain_env1_r1	GLM	QTN-sf0405969948	A/C	4	5969948	4.7298e-08
Grain_env1_r1	GLM	QTN-sf0405970143	C/T	4	5970143	5.1954e-08
Grain_env1_r1	GLM	QTN-sf0405970332	T/C	4	5970332	2.8411e-08
Grain_env1_r1	GLM	QTN-sf0405970734	G/C	4	5970734	1.7821e-07
Grain_env1_r1	GLM	QTN-sf0405970767	A/G	4	5970767	9.2483e-08
Grain_env1_r1	GLM	QTN-sf0405970788	T/C	4	5970788	1.5908e-07
Grain_env1_r1	GLM	QTN-sf0405970798	C/G	4	5970798	4.7345e-08
Grain_env1_r1	GLM	QTN-sf0405971180	A/G	4	5971180	3.9696e-08
Grain_env1_r1	GLM	QTN-sf0405971190	A/G	4	5971190	1.7224e-07
Grain_env1_r1	GLM	QTN-sf0405971944	T/C	4	5971944	2.0612e-08
Grain_env1_r1	GLM	QTN-sf0405972109	G/C	4	5972109	1.0847e-07
Grain_env1_r1	GLM	QTN-sf0405972125	C/T	4	5972125	7.3274e-08
Grain_env1_r1	GLM	QTN-sf0405972602	G/A	4	5972602	2.6852e-08
Grain_env1_r1	GLM	QTN-sf0405972662	A/G	4	5972662	1.501e-08
Grain_env1_r1	GLM	QTN-sf0405973730	G/A	4	5973730	3.8046e-08
Grain_env1_r1	GLM	QTN-sf0405973743	T/C	4	5973743	3.8046e-08
Grain_env1_r1	GLM	QTN-sf0405973752	T/C	4	5973752	9.911e-09
Grain_env1_r1	GLM	QTN-sf0405973928	T/C	4	5973928	1.9986e-08
Grain_env1_r1	GLM	QTN-sf0405974098	A/G	4	5974098	3.3984e-08
Grain_env1_r1	GLM	QTN-sf0405974311	C/G	4	5974311	1.4855e-07
Grain_env1_r1	GLM	QTN-sf0405974523	C/G	4	5974523	1.7453e-08
Grain_env1_r1	GLM	QTN-sf0405974640	T/C	4	5974640	1.7453e-08
Grain_env1_r1	GLM	QTN-sf0405974690	A/C	4	5974690	1.7453e-08
Grain_env1_r1	GLM	QTN-sf0405974728	T/G	4	5974728	6.4223e-08
Grain_env1_r1	GLM	QTN-sf0405974782	C/G	4	5974782	5.2425e-09
Grain_env1_r1	GLM	QTN-sf0405975058	T/C	4	5975058	3.9999e-09
Grain_env1_r1	GLM	QTN-sf0405975099	A/G	4	5975099	9.8575e-09
Grain_env1_r1	GLM	QTN-sf0405975361	A/C	4	5975361	6.0622e-09
Grain_env1_r1	GLM	QTN-sf0405975393	G/A	4	5975393	2.5953e-08
Grain_env1_r1	GLM	QTN-sf0405975547	A/G	4	5975547	3.5962e-08
Grain_env1_r1	GLM	QTN-sf0405975603	G/C	4	5975603	5.006e-08
Grain_env1_r1	GLM	QTN-sf0405975735	T/C	4	5975735	2.4073e-08
Grain_env1_r1	GLM	QTN-sf0405975944	A/T	4	5975944	8.5454e-08
Grain_env1_r1	GLM	QTN-sf0405976033	C/T	4	5976033	3.9442e-08
Grain_env1_r1	GLM	QTN-sf0405976666	T/C	4	5976666	2.2539e-08
Grain_env1_r1	GLM	QTN-sf0405980507	T/C	4	5980507	1.2545e-07
Grain_env1_r1	GLM	QTN-sf0405980599	G/C	4	5980599	3.0438e-09
Grain_env1_r1	GLM	QTN-sf0405980600	A/G	4	5980600	3.0438e-09
Grain_env1_r1	GLM	QTN-sf0405980629	T/A	4	5980629	2.8521e-07
Grain_env1_r1	GLM	QTN-sf0405980831	A/G	4	5980831	3.0438e-09
Grain_env1_r1	GLM	QTN-sf0405980861	C/G	4	5980861	3.0438e-09
Grain_env1_r1	GLM	QTN-sf0405981009	T/C	4	5981009	2.0506e-08
Grain_env1_r1	GLM	QTN-sf0405981072	T/C	4	5981072	1.194e-08
Grain_env1_r1	GLM	QTN-sf0405981425	A/G	4	5981425	1.6781e-07
Grain_env1_r1	GLM	QTN-sf0405984310	T/G	4	5984310	1.7403e-08
Grain_env1_r1	GLM	QTN-sf0405984478	G/C	4	5984478	1.67e-07
Grain_env1_r1	GLM	QTN-sf0405992215	A/T	4	5992215	2.9934e-07
Grain_env1_r1	GLM	QTN-sf0405993756	A/C	4	5993756	9.1421e-08
Grain_env1_r1	GLM	QTN-sf0405994371	T/C	4	5994371	1.2005e-07
Grain_env1_r1	GLM	QTN-sf0405995123	T/G	4	5995123	1.4933e-07
Grain_env1_r1	GLM	QTN-sf0405995162	A/C	4	5995162	1.9163e-07
Grain_env1_r1	GLM	QTN-sf0405995584	A/G	4	5995584	4.2863e-08
Grain_env1_r1	GLM	QTN-sf0405997108	T/C	4	5997108	7.5951e-08
Grain_env1_r1	GLM	QTN-sf0405997840	T/G	4	5997840	1.1972e-07
Grain_env1_r1	GLM	QTN-sf0405998600	T/A	4	5998600	2.8708e-08
Grain_env1_r1	GLM	QTN-sf0405999164	A/T	4	5999164	1.5479e-08
Grain_env1_r1	GLM	QTN-sf0406000673	C/T	4	6000673	3.7415e-08
Grain_env1_r1	GLM	QTN-sf0406002043	T/C	4	6002043	2.2476e-08
Grain_env1_r1	GLM	QTN-sf0406002161	T/C	4	6002161	2.2476e-08
Grain_env1_r1	GLM	QTN-sf0406002227	G/C	4	6002227	5.4579e-08
Grain_env1_r1	GLM	QTN-sf0406002249	A/G	4	6002249	3.2776e-08
Grain_env1_r1	GLM	QTN-sf0406002306	T/C	4	6002306	8.3158e-08
Grain_env1_r1	GLM	QTN-sf0406002326	T/C	4	6002326	2.0276e-08
Grain_env1_r1	GLM	QTN-sf0406002346	A/G	4	6002346	3.393e-08
Grain_env1_r1	GLM	QTN-sf0406002373	T/G	4	6002373	3.393e-08
Grain_env1_r1	GLM	QTN-sf0406002672	A/C	4	6002672	1.3064e-07
Grain_env1_r1	GLM	QTN-sf0406002690	T/C	4	6002690	1.3064e-07
Grain_env1_r1	GLM	QTN-sf0406003146	T/C	4	6003146	1.4007e-07
Grain_env1_r1	GLM	QTN-sf0406003432	A/G	4	6003432	6.7379e-08
Grain_env1_r1	GLM	QTN-sf0406003452	T/C	4	6003452	1.6262e-07
Grain_env1_r1	GLM	QTN-sf0406003843	A/G	4	6003843	6.2815e-08
Grain_env1_r1	GLM	QTN-sf0406004005	C/G	4	6004005	6.2815e-08
Grain_env1_r1	GLM	QTN-sf0406004078	A/C	4	6004078	2.9099e-07
Grain_env1_r1	GLM	QTN-sf0406004079	C/T	4	6004079	2.9099e-07
Grain_env1_r1	GLM	QTN-sf0406004234	C/T	4	6004234	2.2092e-07
Grain_env1_r1	GLM	QTN-sf0406004287	A/G	4	6004287	1.8762e-07
Grain_env1_r1	GLM	QTN-sf0406004365	C/T	4	6004365	5.0401e-08
Grain_env1_r1	GLM	QTN-sf0406004535	T/C	4	6004535	7.8839e-08
Grain_env1_r1	GLM	QTN-sf0406004640	A/G	4	6004640	6.0418e-08
Grain_env1_r1	GLM	QTN-sf0406004777	T/C	4	6004777	7.0946e-08
Grain_env1_r1	GLM	QTN-sf0406004788	T/C	4	6004788	7.3333e-08
Grain_env1_r1	GLM	QTN-sf0406004821	A/G	4	6004821	1.4111e-07
Grain_env1_r1	GLM	QTN-sf0406004838	A/G	4	6004838	9.8424e-08
Grain_env1_r1	GLM	QTN-sf0406004933	T/C	4	6004933	2.5016e-07
Grain_env1_r1	GLM	QTN-sf0406005305	C/G	4	6005305	3.1179e-08
Grain_env1_r1	GLM	QTN-sf0406005309	C/T	4	6005309	3.1179e-08
Grain_env1_r1	GLM	QTN-sf0406005443	T/C	4	6005443	3.531e-08
Grain_env1_r1	GLM	QTN-sf0406005710	G/A	4	6005710	8.5177e-08
Grain_env1_r1	GLM	QTN-sf0406005742	C/T	4	6005742	8.5177e-08
Grain_env1_r1	GLM	QTN-sf0406006175	A/G	4	6006175	1.6071e-07
Grain_env1_r1	GLM	QTN-sf0406006654	C/T	4	6006654	8.2542e-08
Grain_env1_r1	GLM	QTN-sf0406007871	A/G	4	6007871	2.7458e-07
Grain_env1_r1	GLM	QTN-sf0406008672	G/C	4	6008672	7.6983e-08
Grain_env1_r1	GLM	QTN-sf0406008736	A/G	4	6008736	3.1644e-08
Grain_env1_r1	GLM	QTN-sf0406016321	T/A	4	6016321	1.0901e-07
Grain_env1_r1	GLM	QTN-sf0406017011	A/G	4	6017011	2.1614e-08
Grain_env1_r1	GLM	QTN-sf0406017636	T/C	4	6017636	2.0662e-07
Grain_env1_r1	GLM	QTN-sf0406018576	C/T	4	6018576	1.0707e-07
Grain_env1_r1	GLM	QTN-sf0406018740	G/A	4	6018740	1.4055e-07
Grain_env1_r1	GLM	QTN-sf0406018800	C/A	4	6018800	1.9444e-07
Grain_env1_r1	GLM	QTN-sf0406018810	T/C	4	6018810	2.9253e-07
Grain_env1_r1	GLM	QTN-sf0406018881	A/G	4	6018881	5.8611e-08
Grain_env1_r1	GLM	QTN-sf0406019256	A/G	4	6019256	8.907e-08
Grain_env1_r1	GLM	QTN-sf0406021994	A/G	4	6021994	8.5429e-08
Grain_env1_r1	GLM	QTN-sf0406022255	T/C	4	6022255	1.3519e-07
Grain_env1_r1	GLM	QTN-sf0406022530	G/C	4	6022530	2.3822e-07
Grain_env1_r1	GLM	QTN-sf0406022872	C/G	4	6022872	2.7746e-08
Grain_env1_r1	GLM	QTN-sf0406022961	G/A	4	6022961	8.8324e-08
Grain_env1_r1	GLM	QTN-sf0406023143	C/T	4	6023143	2.3695e-07
Grain_env1_r1	GLM	QTN-sf0406023497	T/C	4	6023497	1.9471e-07
Grain_env1_r1	GLM	QTN-sf0406023499	T/C	4	6023499	9.5161e-08
Grain_env1_r1	GLM	QTN-sf0406024572	A/G	4	6024572	2.577e-07
Grain_env1_r1	GLM	QTN-sf0406027631	T/C	4	6027631	2.0685e-07
Grain_env1_r1	GLM	QTN-sf0406028532	A/G	4	6028532	6.5078e-09
Grain_env1_r1	GLM	QTN-sf0406034390	T/C	4	6034390	2.0005e-07
Grain_env1_r1	GLM	QTN-sf0406034499	T/C	4	6034499	1.2714e-08
Grain_env1_r1	GLM	QTN-sf0406035030	C/T	4	6035030	2.4164e-08
Grain_env1_r1	GLM	QTN-sf0406035408	A/G	4	6035408	2.2823e-07
Grain_env1_r1	GLM	QTN-sf0406035751	T/C	4	6035751	1.0853e-07
Grain_env1_r1	GLM	QTN-sf0406035911	T/C	4	6035911	1.0853e-07
Grain_env1_r1	GLM	QTN-sf0406036669	A/G	4	6036669	3.171e-07
Grain_env1_r1	GLM	QTN-sf0406036921	C/T	4	6036921	2.8105e-07
Grain_env1_r1	GLM	QTN-sf0406036956	A/G	4	6036956	2.487e-07
Grain_env1_r1	GLM	QTN-sf0406037044	T/G	4	6037044	2.6236e-07
Grain_env1_r1	GLM	QTN-sf0406037057	C/T	4	6037057	2.2525e-07
Grain_env1_r1	GLM	QTN-sf0406037125	A/G	4	6037125	1.6889e-07
Grain_env1_r1	GLM	QTN-sf0406037145	A/G	4	6037145	1.7711e-07
Grain_env1_r1	GLM	QTN-sf0406037381	T/G	4	6037381	3.3577e-08
Grain_env1_r1	GLM	QTN-sf0406037401	T/C	4	6037401	2.5349e-08
Grain_env1_r1	GLM	QTN-sf0406038091	G/A	4	6038091	2.2954e-08
Grain_env1_r1	GLM	QTN-sf0406038195	A/G	4	6038195	2.2439e-08
Grain_env1_r1	GLM	QTN-sf0406038554	A/G	4	6038554	5.1256e-08
Grain_env1_r1	GLM	QTN-sf0406039456	A/G	4	6039456	1.1189e-07
Grain_env1_r1	GLM	QTN-sf0406039473	T/C	4	6039473	1.1189e-07
Grain_env1_r1	GLM	QTN-sf0406041214	A/G	4	6041214	2.8303e-07
Grain_env1_r1	GLM	QTN-sf0406041724	C/G	4	6041724	3.81e-08
Grain_env1_r1	GLM	QTN-sf0406042717	G/T	4	6042717	1.2577e-07
Grain_env1_r1	GLM	QTN-sf0406042960	T/C	4	6042960	7.9663e-08
Grain_env1_r1	GLM	QTN-sf0406043468	A/G	4	6043468	1.93e-07
Grain_env1_r1	GLM	QTN-sf0406043636	T/C	4	6043636	7.2409e-09
Grain_env1_r1	GLM	QTN-sf0406044565	A/G	4	6044565	3.2156e-07
Grain_env1_r1	GLM	QTN-sf0406044572	A/G	4	6044572	3.2156e-07
Grain_env1_r1	GLM	QTN-sf0406044933	T/C	4	6044933	2.9023e-07
Grain_env1_r1	GLM	QTN-sf0406045654	A/G	4	6045654	1.6577e-07
Grain_env1_r1	GLM	QTN-sf0406046124	C/T	4	6046124	1.4049e-07
Grain_env1_r1	GLM	QTN-sf0406047129	A/T	4	6047129	3.1736e-07
Grain_env1_r1	GLM	QTN-sf0406047153	A/C	4	6047153	1.0063e-07
Grain_env1_r1	GLM	QTN-sf0406048001	T/C	4	6048001	9.7174e-09
Grain_env1_r1	GLM	QTN-sf0406048012	C/T	4	6048012	7.8542e-09
Grain_env1_r1	GLM	QTN-sf0406048062	C/T	4	6048062	1.0316e-07
Grain_env1_r1	GLM	QTN-sf0406049639	T/C	4	6049639	4.1283e-08
Grain_env1_r1	GLM	QTN-sf0406050143	C/G	4	6050143	5.0135e-08
Grain_env1_r1	GLM	QTN-sf0406050499	C/T	4	6050499	5.9888e-08
Grain_env1_r1	GLM	QTN-sf0406050861	T/G	4	6050861	9.7211e-08
Grain_env1_r1	GLM	QTN-sf0406051184	A/T	4	6051184	4.0699e-08
Grain_env1_r1	GLM	QTN-sf0406051881	A/G	4	6051881	5.2879e-08
Grain_env1_r1	GLM	QTN-sf0406052454	A/G	4	6052454	9.6632e-08
Grain_env1_r1	GLM	QTN-sf0406053194	A/G	4	6053194	2.8272e-07
Grain_env1_r1	GLM	QTN-sf0406053230	T/G	4	6053230	2.0969e-07
Grain_env1_r1	GLM	QTN-sf0406054227	T/G	4	6054227	2.9388e-07
Grain_env1_r1	GLM	QTN-sf0406054456	A/G	4	6054456	2.8693e-07
Grain_env1_r1	GLM	QTN-sf0406055606	T/G	4	6055606	1.4488e-07
Grain_env1_r1	GLM	QTN-sf0406055771	A/G	4	6055771	2.7417e-07
Grain_env1_r1	GLM	QTN-sf0406055798	A/T	4	6055798	2.7417e-07
Grain_env1_r1	GLM	QTN-sf0406056966	G/A	4	6056966	8.7873e-08
Grain_env1_r1	GLM	QTN-sf0406057159	T/C	4	6057159	7.8654e-08
Grain_env1_r1	GLM	QTN-sf0406057181	C/G	4	6057181	7.8654e-08
Grain_env1_r1	GLM	QTN-sf0406057402	A/C	4	6057402	9.0944e-08
Grain_env1_r1	GLM	QTN-sf0406059004	T/C	4	6059004	1.0924e-07
Grain_env1_r1	GLM	QTN-sf0406059453	A/G	4	6059453	1.134e-08
Grain_env1_r1	GLM	QTN-sf0406064016	T/C	4	6064016	1.6686e-07
Grain_env1_r1	GLM	QTN-sf0406065087	A/C	4	6065087	2.3444e-07
Grain_env1_r1	GLM	QTN-sf0406065165	T/A	4	6065165	1.4303e-07
Grain_env1_r1	GLM	QTN-sf0406085329	T/G	4	6085329	1.3101e-07
Grain_env1_r1	GLM	QTN-sf0406085919	A/C	4	6085919	1.6117e-07
Grain_env1_r1	GLM	QTN-sf0406086132	T/C	4	6086132	7.6793e-08
Grain_env1_r1	GLM	QTN-sf0406086504	T/A	4	6086504	2.6076e-07
Grain_env1_r1	GLM	QTN-sf0406086995	C/T	4	6086995	1.5889e-08
Grain_env1_r1	GLM	QTN-sf0406087129	A/G	4	6087129	1.1485e-07
Grain_env1_r1	GLM	QTN-sf0406087317	G/A	4	6087317	1.0192e-07
Grain_env1_r1	GLM	QTN-sf0406087323	C/A	4	6087323	1.0192e-07
Grain_env1_r1	GLM	QTN-sf0406087691	A/G	4	6087691	2.5965e-07
Grain_env1_r1	GLM	QTN-sf0406087704	G/C	4	6087704	2.5965e-07
Grain_env1_r1	GLM	QTN-sf0406087977	A/G	4	6087977	4.8031e-08
Grain_env1_r1	GLM	QTN-sf0406088006	A/G	4	6088006	3.6282e-08
Grain_env1_r1	GLM	QTN-sf0406088086	T/C	4	6088086	1.0526e-07
Grain_env1_r1	GLM	QTN-sf0406088137	T/C	4	6088137	6.6487e-08
Grain_env1_r1	GLM	QTN-sf0406090077	T/C	4	6090077	3.5382e-08
Grain_env1_r1	GLM	QTN-sf0406090092	T/C	4	6090092	3.1246e-07
Grain_env1_r1	GLM	QTN-sf0406090367	A/G	4	6090367	1.7315e-08
Grain_env1_r1	GLM	QTN-sf0406090719	G/A	4	6090719	3.1267e-08
Grain_env1_r1	GLM	QTN-sf0406090854	T/C	4	6090854	9.2328e-08
Grain_env1_r1	GLM	QTN-sf0406092411	T/G	4	6092411	2.7269e-08
Grain_env1_r1	GLM	QTN-sf0406092613	T/C	4	6092613	2.7269e-08
Grain_env1_r1	GLM	QTN-sf0406093154	G/A	4	6093154	3.2501e-08
Grain_env1_r1	GLM	QTN-sf0406093387	C/T	4	6093387	3.1566e-07
Grain_env1_r1	GLM	QTN-sf0406093870	C/T	4	6093870	1.9601e-07
Grain_env1_r1	GLM	QTN-sf0406094351	C/T	4	6094351	1.9645e-07
Grain_env1_r1	GLM	QTN-sf0406094700	T/C	4	6094700	2.4114e-07
Grain_env1_r1	GLM	QTN-sf0406094770	T/C	4	6094770	3.8556e-08
Grain_env1_r1	GLM	QTN-sf0406095874	C/G	4	6095874	6.1571e-08
Grain_env1_r1	GLM	QTN-sf0406096102	A/G	4	6096102	6.4914e-08
Grain_env1_r1	GLM	QTN-sf0406096159	T/C	4	6096159	2.1866e-07
Grain_env1_r1	GLM	QTN-sf0406096459	A/G	4	6096459	1.9885e-07
Grain_env1_r1	GLM	QTN-sf0406096968	T/C	4	6096968	1.8221e-07
Grain_env1_r1	GLM	QTN-sf0406097676	A/G	4	6097676	1.3253e-07
Grain_env1_r1	GLM	QTN-sf0406100329	T/C	4	6100329	3.5234e-08
Grain_env1_r1	GLM	QTN-sf0406101280	G/A	4	6101280	7.4156e-08
Grain_env1_r1	GLM	QTN-sf0406101318	A/G	4	6101318	2.0313e-08
Grain_env1_r1	GLM	QTN-sf0406101348	T/C	4	6101348	6.2651e-09
Grain_env1_r1	GLM	QTN-sf0406102038	T/C	4	6102038	2.3996e-08
Grain_env1_r1	GLM	QTN-sf0406102151	T/C	4	6102151	8.5077e-08
Grain_env1_r1	GLM	QTN-sf0406102281	C/T	4	6102281	1.0645e-07
Grain_env1_r1	GLM	QTN-sf0406102332	T/G	4	6102332	1.0645e-07
Grain_env1_r1	GLM	QTN-sf0406102703	A/T	4	6102703	6.0959e-08
Grain_env1_r1	GLM	QTN-sf0406102739	T/C	4	6102739	6.0959e-08
Grain_env1_r1	GLM	QTN-sf0406102774	A/G	4	6102774	6.0959e-08
Grain_env1_r1	GLM	QTN-sf0406103821	G/A	4	6103821	1.0248e-07
Grain_env1_r1	GLM	QTN-sf0406104097	T/C	4	6104097	2.1936e-07
Grain_env1_r1	GLM	QTN-sf0406104495	T/C	4	6104495	1.6249e-07
Grain_env1_r1	GLM	QTN-sf0406104540	A/G	4	6104540	1.6249e-07
Grain_env1_r1	GLM	QTN-sf0406128015	T/C	4	6128015	4.8071e-08
Grain_env1_r1	GLM	QTN-sf0406130506	A/G	4	6130506	1.1069e-08
Grain_env1_r1	GLM	QTN-sf0406130591	T/C	4	6130591	1.012e-07
Grain_env1_r1	GLM	QTN-sf0406130615	T/C	4	6130615	9.5283e-08
Grain_env1_r1	GLM	QTN-sf0406131388	A/G	4	6131388	2.7867e-08
Grain_env1_r1	GLM	QTN-sf0406131496	T/C	4	6131496	1.564e-08
Grain_env1_r1	GLM	QTN-sf0406131608	A/G	4	6131608	1.6582e-07
Grain_env1_r1	GLM	QTN-sf0406131747	C/G	4	6131747	5.0159e-08
Grain_env1_r1	GLM	QTN-sf0406131989	T/C	4	6131989	1.4699e-07
Grain_env1_r1	GLM	QTN-sf0406132100	A/G	4	6132100	1.7791e-07
Grain_env1_r1	GLM	QTN-sf0406132144	A/C	4	6132144	1.3476e-07
Grain_env1_r1	GLM	QTN-sf0406132207	T/C	4	6132207	1.4444e-07
Grain_env1_r1	GLM	QTN-sf0406132467	G/C	4	6132467	1.8764e-07
Grain_env1_r1	GLM	QTN-sf0406133068	T/C	4	6133068	7.1827e-08
Grain_env1_r1	GLM	QTN-sf0406133389	T/C	4	6133389	6.378e-08
Grain_env1_r1	GLM	QTN-sf0406133709	A/T	4	6133709	2.8615e-07
Grain_env1_r1	GLM	QTN-sf0406133727	A/G	4	6133727	4.0709e-08
Grain_env1_r1	GLM	QTN-sf0406133765	A/G	4	6133765	1.3107e-07
Grain_env1_r1	GLM	QTN-sf0406133924	A/T	4	6133924	1.5637e-07
Grain_env1_r1	GLM	QTN-sf0406133937	C/T	4	6133937	2.3172e-07
Grain_env1_r1	GLM	QTN-sf0406134074	C/A	4	6134074	1.0632e-07
Grain_env1_r1	GLM	QTN-sf0406134418	C/T	4	6134418	1.605e-07
Grain_env1_r1	GLM	QTN-sf0406134791	A/G	4	6134791	4.5542e-08
Grain_env1_r1	GLM	QTN-sf0406134800	T/C	4	6134800	1.3872e-07
Grain_env1_r1	GLM	QTN-sf0406134804	T/C	4	6134804	1.3872e-07
Grain_env1_r1	GLM	QTN-sf0406135169	T/G	4	6135169	1.0661e-07
Grain_env1_r1	GLM	QTN-sf0406135211	T/C	4	6135211	8.1374e-08
Grain_env1_r1	GLM	QTN-sf0406135973	C/G	4	6135973	3.5534e-08
Grain_env1_r1	GLM	QTN-sf0406136189	G/A	4	6136189	6.2557e-08
Grain_env1_r1	GLM	QTN-sf0406136273	A/G	4	6136273	8.2756e-08
Grain_env1_r1	GLM	QTN-sf0406136482	A/C	4	6136482	2.8731e-07
Grain_env1_r1	GLM	QTN-sf0406136563	A/T	4	6136563	2.1417e-07
Grain_env1_r1	GLM	QTN-sf0406136582	T/C	4	6136582	1.2695e-07
Grain_env1_r1	GLM	QTN-sf0406136725	T/C	4	6136725	1.3646e-07
Grain_env1_r1	GLM	QTN-sf0406136977	T/C	4	6136977	2.1561e-07
Grain_env1_r1	GLM	QTN-sf0406137058	A/T	4	6137058	2.5825e-07
Grain_env1_r1	GLM	QTN-sf0406137390	C/A	4	6137390	9.2701e-08
Grain_env1_r1	GLM	QTN-sf0406137464	T/C	4	6137464	1.3348e-07
Grain_env1_r1	GLM	QTN-sf0406137504	A/G	4	6137504	4.2098e-08
Grain_env1_r1	GLM	QTN-sf0406137725	C/T	4	6137725	1.5361e-07
Grain_env1_r1	GLM	QTN-sf0406137726	T/G	4	6137726	1.5361e-07
Grain_env1_r1	GLM	QTN-sf0406138258	T/C	4	6138258	1.0821e-07
Grain_env1_r1	GLM	QTN-sf0406138519	G/C	4	6138519	3.1019e-09
Grain_env1_r1	GLM	QTN-sf0406138569	T/A	4	6138569	3.6034e-08
Grain_env1_r1	GLM	QTN-sf0406138806	T/C	4	6138806	3.4023e-08
Grain_env1_r1	GLM	QTN-sf0406138825	T/C	4	6138825	3.4023e-08
Grain_env1_r1	GLM	QTN-sf0406138901	T/C	4	6138901	4.0608e-09
Grain_env1_r1	GLM	QTN-sf0406138920	C/G	4	6138920	9.1388e-09
Grain_env1_r1	GLM	QTN-sf0406138923	G/A	4	6138923	9.1388e-09
Grain_env1_r1	GLM	QTN-sf0406139010	T/C	4	6139010	1.3026e-07
Grain_env1_r1	GLM	QTN-sf0406139047	A/G	4	6139047	1.8071e-07
Grain_env1_r1	GLM	QTN-sf0406139233	T/C	4	6139233	3.1921e-08
Grain_env1_r1	GLM	QTN-sf0406139301	G/T	4	6139301	5.0638e-08
Grain_env1_r1	GLM	QTN-sf0406139386	C/A	4	6139386	1.1647e-08
Grain_env1_r1	GLM	QTN-sf0406139467	A/G	4	6139467	2.1865e-08
Grain_env1_r1	GLM	QTN-sf0406139562	T/C	4	6139562	7.0305e-08
Grain_env1_r1	GLM	QTN-sf0406139861	A/C	4	6139861	3.8737e-08
Grain_env1_r1	GLM	QTN-sf0406139883	T/C	4	6139883	3.2726e-08
Grain_env1_r1	GLM	QTN-sf0406139939	T/C	4	6139939	9.4645e-08
Grain_env1_r1	GLM	QTN-sf0406140088	T/C	4	6140088	1.7498e-08
Grain_env1_r1	GLM	QTN-sf0406140432	A/G	4	6140432	4.9341e-08
Grain_env1_r1	GLM	QTN-sf0406140478	T/C	4	6140478	5.1444e-08
Grain_env1_r1	GLM	QTN-sf0406141030	A/G	4	6141030	4.5042e-08
Grain_env1_r1	GLM	QTN-sf0406141210	A/G	4	6141210	2.2796e-07
Grain_env1_r1	GLM	QTN-sf0406141250	G/C	4	6141250	8.9281e-08
Grain_env1_r1	GLM	QTN-sf0406142518	C/T	4	6142518	9.7373e-08
Grain_env1_r1	GLM	QTN-sf0406142906	A/G	4	6142906	1.704e-07
Grain_env1_r1	GLM	QTN-sf0406143126	G/C	4	6143126	8.9381e-08
Grain_env1_r1	GLM	QTN-sf0406143984	T/C	4	6143984	1.7499e-07
Grain_env1_r1	GLM	QTN-sf0406144534	A/G	4	6144534	2.9387e-07
Grain_env1_r1	GLM	QTN-sf0406144619	G/C	4	6144619	1.6865e-07
Grain_env1_r1	GLM	QTN-sf0406144620	T/G	4	6144620	1.6865e-07
Grain_env1_r1	GLM	QTN-sf0406144912	T/C	4	6144912	1.3006e-07
Grain_env1_r1	GLM	QTN-sf0406144973	T/C	4	6144973	1.7322e-07
Grain_env1_r1	GLM	QTN-sf0406144986	T/C	4	6144986	1.7322e-07
Grain_env1_r1	GLM	QTN-sf0406144997	T/G	4	6144997	1.7322e-07
Grain_env1_r1	GLM	QTN-sf0406146632	T/C	4	6146632	9.0399e-08
Grain_env1_r1	GLM	QTN-sf0406146651	A/G	4	6146651	6.8261e-08
Grain_env1_r1	GLM	QTN-sf0406147320	A/G	4	6147320	1.8522e-07
Grain_env1_r1	GLM	QTN-sf0406147342	G/C	4	6147342	1.8522e-07
Grain_env1_r1	GLM	QTN-sf0406151517	A/T	4	6151517	2.6025e-08
Grain_env1_r1	GLM	QTN-sf0406151786	C/T	4	6151786	1.2714e-08
Grain_env1_r1	GLM	QTN-sf0406151968	T/C	4	6151968	2.9698e-08
Grain_env1_r1	GLM	QTN-sf0406152074	A/G	4	6152074	3.2372e-08
Grain_env1_r1	GLM	QTN-sf0406152138	A/G	4	6152138	6.0956e-09
Grain_env1_r1	GLM	QTN-sf0406152148	T/G	4	6152148	6.0956e-09
Grain_env1_r1	GLM	QTN-sf0406156756	A/G	4	6156756	2.0593e-07
Grain_env1_r1	GLM	QTN-sf0406157726	A/G	4	6157726	1.7101e-07
Grain_env1_r1	GLM	QTN-sf0406157890	A/G	4	6157890	3.729e-08
Grain_env1_r1	GLM	QTN-sf0406158057	A/C	4	6158057	1.2995e-07
Grain_env1_r1	GLM	QTN-sf0406158481	A/G	4	6158481	2.3707e-07
Grain_env1_r1	GLM	QTN-sf0406158794	A/G	4	6158794	1.7048e-07
Grain_env1_r1	GLM	QTN-sf0406159117	A/G	4	6159117	7.2891e-08
Grain_env1_r1	GLM	QTN-sf0406159471	A/C	4	6159471	9.1177e-08
Grain_env1_r1	GLM	QTN-sf0406159472	A/T	4	6159472	9.1177e-08
Grain_env1_r1	GLM	QTN-sf0406159806	T/C	4	6159806	4.5925e-08
Grain_env1_r1	GLM	QTN-sf0406159989	C/T	4	6159989	1.2469e-07
Grain_env1_r1	GLM	QTN-sf0406160048	A/C	4	6160048	6.5364e-08
Grain_env1_r1	GLM	QTN-sf0406160332	T/G	4	6160332	1.0154e-08
Grain_env1_r1	GLM	QTN-sf0406160333	T/A	4	6160333	1.0154e-08
Grain_env1_r1	GLM	QTN-sf0406160710	A/G	4	6160710	1.7195e-07
Grain_env1_r1	GLM	QTN-sf0406160951	A/G	4	6160951	1.8149e-07
Grain_env1_r1	GLM	QTN-sf0406161029	A/G	4	6161029	8.941e-08
Grain_env1_r1	GLM	QTN-sf0406161163	T/G	4	6161163	9.9863e-08
Grain_env1_r1	GLM	QTN-sf0406161195	C/G	4	6161195	9.9863e-08
Grain_env1_r1	GLM	QTN-sf0406161234	A/G	4	6161234	6.1798e-08
Grain_env1_r1	GLM	QTN-sf0406161339	A/G	4	6161339	1.0004e-07
Grain_env1_r1	GLM	QTN-sf0406161408	A/G	4	6161408	8.5761e-08
Grain_env1_r1	GLM	QTN-sf0406161455	A/G	4	6161455	1.8938e-07
Grain_env1_r1	GLM	QTN-sf0406161571	G/T	4	6161571	8.44e-08
Grain_env1_r1	GLM	QTN-sf0406161573	A/G	4	6161573	8.44e-08
Grain_env1_r1	GLM	QTN-sf0406161642	A/G	4	6161642	5.3191e-08
Grain_env1_r1	GLM	QTN-sf0406161674	T/G	4	6161674	9.5573e-08
Grain_env1_r1	GLM	QTN-sf0406161803	T/G	4	6161803	7.1684e-08
Grain_env1_r1	GLM	QTN-sf0406161824	T/A	4	6161824	2.5088e-07
Grain_env1_r1	GLM	QTN-sf0406161833	T/C	4	6161833	2.5088e-07
Grain_env1_r1	GLM	QTN-sf0406162074	A/G	4	6162074	1.3037e-07
Grain_env1_r1	GLM	QTN-sf0406162082	A/G	4	6162082	1.6597e-07
Grain_env1_r1	GLM	QTN-sf0406162155	T/C	4	6162155	7.2215e-08
Grain_env1_r1	GLM	QTN-sf0406162181	C/A	4	6162181	2.439e-07
Grain_env1_r1	GLM	QTN-sf0406162222	T/C	4	6162222	4.7243e-08
Grain_env1_r1	GLM	QTN-sf0406162346	T/C	4	6162346	4.3524e-08
Grain_env1_r1	GLM	QTN-sf0406162367	A/G	4	6162367	4.2121e-08
Grain_env1_r1	GLM	QTN-sf0406162438	C/G	4	6162438	1.1307e-07
Grain_env1_r1	GLM	QTN-sf0406162506	T/C	4	6162506	1.3951e-07
Grain_env1_r1	GLM	QTN-sf0406162515	T/A	4	6162515	2.8603e-07
Grain_env1_r1	GLM	QTN-sf0406163037	A/G	4	6163037	2.4408e-07
Grain_env1_r1	GLM	QTN-sf0406163646	A/G	4	6163646	3.7262e-08
Grain_env1_r1	GLM	QTN-sf0406163871	A/G	4	6163871	3.4455e-08
Grain_env1_r1	GLM	QTN-sf0406163926	A/C	4	6163926	1.8162e-07
Grain_env1_r1	GLM	QTN-sf0406163988	G/T	4	6163988	4.8108e-08
Grain_env1_r1	GLM	QTN-sf0406164039	A/G	4	6164039	1.5188e-07
Grain_env1_r1	GLM	QTN-sf0406164127	A/G	4	6164127	1.5714e-07
Grain_env1_r1	GLM	QTN-sf0406164420	T/A	4	6164420	6.6658e-08
Grain_env1_r1	GLM	QTN-sf0406164670	T/C	4	6164670	2.872e-07
Grain_env1_r1	GLM	QTN-sf0406164706	T/C	4	6164706	5.2637e-08
Grain_env1_r1	GLM	QTN-sf0406164761	C/T	4	6164761	1.0223e-07
Grain_env1_r1	GLM	QTN-sf0406164835	A/G	4	6164835	9.8518e-08
Grain_env1_r1	GLM	QTN-sf0406164874	C/T	4	6164874	5.9706e-08
Grain_env1_r1	GLM	QTN-sf0406164983	A/G	4	6164983	2.7112e-07
Grain_env1_r1	GLM	QTN-sf0406164991	T/C	4	6164991	2.7112e-07
Grain_env1_r1	GLM	QTN-sf0406165135	T/C	4	6165135	8.0628e-08
Grain_env1_r1	GLM	QTN-sf0406165165	T/C	4	6165165	8.7472e-08
Grain_env1_r1	GLM	QTN-sf0406165294	G/C	4	6165294	1.3132e-07
Grain_env1_r1	GLM	QTN-sf0406165296	T/G	4	6165296	1.3132e-07
Grain_env1_r1	GLM	QTN-sf0406165318	A/G	4	6165318	1.4133e-07
Grain_env1_r1	GLM	QTN-sf0406165496	T/C	4	6165496	2.9609e-07
Grain_env1_r1	GLM	QTN-sf0406165535	A/G	4	6165535	2.9609e-07
Grain_env1_r1	GLM	QTN-sf0406165566	A/G	4	6165566	6.9946e-08
Grain_env1_r1	GLM	QTN-sf0406165709	T/C	4	6165709	1.755e-07
Grain_env1_r1	GLM	QTN-sf0406165876	A/G	4	6165876	1.4428e-07
Grain_env1_r1	GLM	QTN-sf0406166070	T/C	4	6166070	9.4586e-08
Grain_env1_r1	GLM	QTN-sf0406166071	T/C	4	6166071	9.4586e-08
Grain_env1_r1	GLM	QTN-sf0406166318	A/G	4	6166318	6.5907e-08
Grain_env1_r1	GLM	QTN-sf0406166399	T/C	4	6166399	5.9687e-08
Grain_env1_r1	GLM	QTN-sf0406166439	T/C	4	6166439	5.9687e-08
Grain_env1_r1	GLM	QTN-sf0406166687	T/C	4	6166687	2.2681e-07
Grain_env1_r1	GLM	QTN-sf0406179992	A/T	4	6179992	1.0484e-07
Grain_env1_r1	GLM	QTN-sf0406180011	A/T	4	6180011	3.1346e-07
Grain_env1_r1	GLM	QTN-sf0406180108	T/C	4	6180108	1.0131e-08
Grain_env1_r1	GLM	QTN-sf0406180240	C/T	4	6180240	7.5373e-08
Grain_env1_r1	GLM	QTN-sf0406180501	G/A	4	6180501	1.8595e-07
Grain_env1_r1	GLM	QTN-sf0406180520	T/A	4	6180520	2.4832e-08
Grain_env1_r1	GLM	QTN-sf0406180660	G/A	4	6180660	6.7179e-10
Grain_env1_r1	GLM	QTN-sf0406180661	T/C	4	6180661	5.3073e-09
Grain_env1_r1	GLM	QTN-sf0406180680	T/C	4	6180680	1.4486e-08
Grain_env1_r1	GLM	QTN-sf0406180747	T/G	4	6180747	8.7196e-09
Grain_env1_r1	GLM	QTN-sf0406180750	A/G	4	6180750	8.7196e-09
Grain_env1_r1	GLM	QTN-sf0406180758	T/G	4	6180758	8.7196e-09
Grain_env1_r1	GLM	QTN-sf0406180876	A/G	4	6180876	2.5947e-09
Grain_env1_r1	GLM	QTN-sf0406180896	C/G	4	6180896	2.5947e-09
Grain_env1_r1	GLM	QTN-sf0406180902	T/C	4	6180902	2.5947e-09
Grain_env1_r1	GLM	QTN-sf0406180952	T/C	4	6180952	3.7957e-09
Grain_env1_r1	GLM	QTN-sf0406181199	C/G	4	6181199	6.6677e-08
Grain_env1_r1	GLM	QTN-sf0406181202	T/C	4	6181202	6.6677e-08
Grain_env1_r1	GLM	QTN-sf0406184345	A/C	4	6184345	1.7912e-07
Grain_env1_r1	GLM	QTN-sf0406184567	C/T	4	6184567	2.9696e-07
Grain_env1_r1	GLM	QTN-sf0406184587	A/C	4	6184587	2.9696e-07
Grain_env1_r1	GLM	QTN-sf0406184643	C/T	4	6184643	4.0792e-08
Grain_env1_r1	GLM	QTN-sf0406184762	A/G	4	6184762	3.5981e-08
Grain_env1_r1	GLM	QTN-sf0406184776	T/C	4	6184776	4.6047e-08
Grain_env1_r1	GLM	QTN-sf0406185099	A/G	4	6185099	6.6486e-08
Grain_env1_r1	GLM	QTN-sf0406185181	T/C	4	6185181	1.3353e-08
Grain_env1_r1	GLM	QTN-sf0406185287	A/G	4	6185287	2.0151e-07
Grain_env1_r1	GLM	QTN-sf0406185677	T/C	4	6185677	2.565e-07
Grain_env1_r1	GLM	QTN-sf0406185687	T/C	4	6185687	2.7403e-07
Grain_env1_r1	GLM	QTN-sf0406186048	A/G	4	6186048	6.3632e-08
Grain_env1_r1	GLM	QTN-sf0406186072	A/G	4	6186072	2.5992e-07
Grain_env1_r1	GLM	QTN-sf0406186306	G/T	4	6186306	2.1896e-07
Grain_env1_r1	GLM	QTN-sf0406186715	A/C	4	6186715	2.5841e-07
Grain_env1_r1	GLM	QTN-sf0406186737	T/C	4	6186737	2.1561e-07
Grain_env1_r1	GLM	QTN-sf0406186919	T/C	4	6186919	3.1926e-07
Grain_env1_r1	GLM	QTN-sf0406187012	T/C	4	6187012	3.1589e-07
Grain_env1_r1	GLM	QTN-sf0406187206	T/C	4	6187206	3.056e-07
Grain_env1_r1	GLM	QTN-sf0406187225	C/T	4	6187225	1.0219e-07
Grain_env1_r1	GLM	QTN-sf0406187602	T/C	4	6187602	2.2175e-07
Grain_env1_r1	GLM	QTN-sf0406187604	A/C	4	6187604	2.2175e-07
Grain_env1_r1	GLM	QTN-sf0406187787	G/A	4	6187787	2.2421e-07
Grain_env1_r1	GLM	QTN-sf0406187970	A/G	4	6187970	1.5495e-07
Grain_env1_r1	GLM	QTN-sf0406187972	G/C	4	6187972	1.5495e-07
Grain_env1_r1	GLM	QTN-sf0406188027	T/C	4	6188027	4.4434e-08
Grain_env1_r1	GLM	QTN-sf0406188049	A/C	4	6188049	6.4472e-08
Grain_env1_r1	GLM	QTN-sf0406188447	C/T	4	6188447	1.4143e-07
Grain_env1_r1	GLM	QTN-sf0406188462	A/G	4	6188462	2.4371e-07
Grain_env1_r1	GLM	QTN-sf0406189009	T/C	4	6189009	6.7363e-08
Grain_env1_r1	GLM	QTN-sf0406195307	A/G	4	6195307	1.9334e-07
Grain_env1_r1	GLM	QTN-sf0406195535	G/A	4	6195535	1.8266e-08
Grain_env1_r1	GLM	QTN-sf0406196075	A/C	4	6196075	2.4629e-07
Grain_env1_r1	GLM	QTN-sf0406196138	T/C	4	6196138	1.2771e-07
Grain_env1_r1	GLM	QTN-sf0406196783	T/C	4	6196783	8.7064e-08
Grain_env1_r1	GLM	QTN-sf0406196891	G/A	4	6196891	1.2077e-07
Grain_env1_r1	GLM	QTN-sf0406197267	T/A	4	6197267	9.054e-08
Grain_env1_r1	GLM	QTN-sf0406197344	T/C	4	6197344	1.0749e-07
Grain_env1_r1	GLM	QTN-sf0406197378	A/G	4	6197378	1.7175e-07
Grain_env1_r1	GLM	QTN-sf0406197758	G/C	4	6197758	3.6467e-08
Grain_env1_r1	GLM	QTN-sf0406198167	T/C	4	6198167	2.4408e-07
Grain_env1_r1	GLM	QTN-sf0406198207	T/A	4	6198207	7.9205e-08
Grain_env1_r1	GLM	QTN-sf0406198216	A/G	4	6198216	7.9205e-08
Grain_env1_r1	GLM	QTN-sf0406198273	T/C	4	6198273	1.4418e-07
Grain_env1_r1	GLM	QTN-sf0406198328	C/T	4	6198328	2.1612e-07
Grain_env1_r1	GLM	QTN-sf0406198559	A/G	4	6198559	2.9041e-07
Grain_env1_r1	GLM	QTN-sf0406198689	C/G	4	6198689	2.3844e-07
Grain_env1_r1	GLM	QTN-sf0406199054	A/G	4	6199054	1.625e-07
Grain_env1_r1	GLM	QTN-sf0406199479	G/A	4	6199479	2.4361e-07
Grain_env1_r1	GLM	QTN-sf0406199490	T/G	4	6199490	2.3132e-07
Grain_env1_r1	GLM	QTN-sf0406199597	G/C	4	6199597	1.3106e-07
Grain_env1_r1	GLM	QTN-sf0406199780	A/C	4	6199780	2.2109e-07
Grain_env1_r1	GLM	QTN-sf0406200057	A/G	4	6200057	2.9469e-07
Grain_env1_r1	GLM	QTN-sf0406200152	T/C	4	6200152	2.0649e-07
Grain_env1_r1	GLM	QTN-sf0406200181	A/G	4	6200181	2.3795e-07
Grain_env1_r1	GLM	QTN-sf0406200316	A/G	4	6200316	1.7646e-07
Grain_env1_r1	GLM	QTN-sf0406201534	T/G	4	6201534	2.911e-08
Grain_env1_r1	GLM	QTN-sf0406201597	G/A	4	6201597	7.3391e-08
Grain_env1_r1	GLM	QTN-sf0406201851	A/G	4	6201851	2.9959e-07
Grain_env1_r1	GLM	QTN-sf0406201972	A/G	4	6201972	1.5391e-07
Grain_env1_r1	GLM	QTN-sf0406201973	G/C	4	6201973	1.5391e-07
Grain_env1_r1	GLM	QTN-sf0406201994	A/G	4	6201994	1.7028e-07
Grain_env1_r1	GLM	QTN-sf0406202098	G/A	4	6202098	1.6709e-07
Grain_env1_r1	GLM	QTN-sf0406203296	T/C	4	6203296	7.2769e-08
Grain_env1_r1	GLM	QTN-sf0406203314	T/C	4	6203314	5.4053e-08
Grain_env1_r1	GLM	QTN-sf0406203426	C/G	4	6203426	5.1309e-08
Grain_env1_r1	GLM	QTN-sf0406203998	T/C	4	6203998	1.5143e-07
Grain_env1_r1	GLM	QTN-sf0406204246	G/C	4	6204246	6.8245e-08
Grain_env1_r1	GLM	QTN-sf0406206888	T/C	4	6206888	1.1436e-07
Grain_env1_r1	GLM	QTN-sf0406207304	T/C	4	6207304	8.036e-08
Grain_env1_r1	GLM	QTN-sf0406207980	A/G	4	6207980	1.5308e-07
Grain_env1_r1	GLM	QTN-sf0406208270	T/C	4	6208270	2.0502e-08
Grain_env1_r1	GLM	QTN-sf0406208762	G/C	4	6208762	1.8983e-07
Grain_env1_r1	GLM	QTN-sf0406209309	A/G	4	6209309	3.3878e-08
Grain_env1_r1	GLM	QTN-sf0406209404	A/G	4	6209404	1.1237e-08
Grain_env1_r1	GLM	QTN-sf0406209415	T/C	4	6209415	8.0956e-09
Grain_env1_r1	GLM	QTN-sf0406209576	G/C	4	6209576	2.8877e-09
Grain_env1_r1	GLM	QTN-sf0406209657	T/C	4	6209657	1.9945e-07
Grain_env1_r1	GLM	QTN-sf0406209796	A/G	4	6209796	2.4961e-07
Grain_env1_r1	GLM	QTN-sf0406209825	A/G	4	6209825	5.6973e-08
Grain_env1_r1	GLM	QTN-sf0406209831	T/C	4	6209831	5.6973e-08
Grain_env1_r1	GLM	QTN-sf0406210106	T/C	4	6210106	3.3385e-08
Grain_env1_r1	GLM	QTN-sf0406210433	T/C	4	6210433	1.1602e-08
Grain_env1_r1	GLM	QTN-sf0406211089	A/G	4	6211089	1.3561e-07
Grain_env1_r1	GLM	QTN-sf0406211096	T/C	4	6211096	1.3561e-07
Grain_env1_r1	GLM	QTN-sf0406211168	A/T	4	6211168	2.3675e-07
Grain_env1_r1	GLM	QTN-sf0406211771	G/C	4	6211771	1.5537e-07
Grain_env1_r1	GLM	QTN-sf0406211864	G/C	4	6211864	1.884e-07
Grain_env1_r1	GLM	QTN-sf0406217525	T/G	4	6217525	8.2362e-08
Grain_env1_r1	GLM	QTN-sf0406217837	A/G	4	6217837	1.2646e-07
Grain_env1_r1	GLM	QTN-sf0406217970	T/C	4	6217970	1.0515e-07
Grain_env1_r1	GLM	QTN-sf0406217978	T/C	4	6217978	2.2994e-09
Grain_env1_r1	GLM	QTN-sf0406218817	C/A	4	6218817	2.0086e-07
Grain_env1_r1	GLM	QTN-sf0406219081	T/C	4	6219081	3.1415e-07
Grain_env1_r1	GLM	QTN-sf0406219157	T/C	4	6219157	8.1581e-08
Grain_env1_r1	GLM	QTN-sf0406219213	T/C	4	6219213	2.082e-07
Grain_env1_r1	GLM	QTN-sf0406219214	C/A	4	6219214	2.082e-07
Grain_env1_r1	GLM	QTN-sf0406219307	C/T	4	6219307	7.1272e-08
Grain_env1_r1	GLM	QTN-sf0406219323	T/C	4	6219323	2.1086e-07
Grain_env1_r1	GLM	QTN-sf0406219488	A/G	4	6219488	1.7707e-07
Grain_env1_r1	GLM	QTN-sf0406219571	A/G	4	6219571	1.013e-07
Grain_env1_r1	GLM	QTN-sf0406220319	T/C	4	6220319	1.9581e-07
Grain_env1_r1	GLM	QTN-sf0406220422	G/C	4	6220422	9.4075e-08
Grain_env1_r1	GLM	QTN-sf0406220543	T/C	4	6220543	5.0163e-08
Grain_env1_r1	GLM	QTN-sf0406222281	A/C	4	6222281	2.5882e-07
Grain_env1_r1	GLM	QTN-sf0406222701	A/G	4	6222701	7.9316e-08
Grain_env1_r1	GLM	QTN-sf0406223509	C/T	4	6223509	1.4315e-07
Grain_env1_r1	GLM	QTN-sf0406223628	A/G	4	6223628	6.7576e-08
Grain_env1_r1	GLM	QTN-sf0406227823	C/A	4	6227823	5.5072e-08
Grain_env1_r1	GLM	QTN-sf0406228200	C/A	4	6228200	7.8984e-08
Grain_env1_r1	GLM	QTN-sf0406229214	T/C	4	6229214	2.5871e-07
Grain_env1_r1	GLM	QTN-sf0406229251	A/G	4	6229251	2.4401e-07
Grain_env1_r1	GLM	QTN-sf0406230551	A/G	4	6230551	2.8225e-08
Grain_env1_r1	GLM	QTN-sf0406232122	A/G	4	6232122	1.5013e-07
Grain_env1_r1	GLM	QTN-sf0406233157	A/C	4	6233157	2.9051e-07
Grain_env1_r1	GLM	QTN-sf0406235884	T/C	4	6235884	2.029e-08
Grain_env1_r1	GLM	QTN-sf0406235886	A/G	4	6235886	2.4009e-08
Grain_env1_r1	GLM	QTN-sf0406236218	T/C	4	6236218	1.5775e-07
Grain_env1_r1	GLM	QTN-sf0406236256	A/G	4	6236256	2.864e-07
Grain_env1_r1	GLM	QTN-sf0406236478	T/G	4	6236478	4.8282e-08
Grain_env1_r1	GLM	QTN-sf0406236842	C/T	4	6236842	1.573e-07
Grain_env1_r1	GLM	QTN-sf0406237558	A/G	4	6237558	2.4111e-07
Grain_env1_r1	GLM	QTN-sf0406238373	T/C	4	6238373	2.7125e-07
Grain_env1_r1	GLM	QTN-sf0406238475	A/G	4	6238475	1.6746e-07
Grain_env1_r1	GLM	QTN-sf0406238530	T/C	4	6238530	1.5502e-07
Grain_env1_r1	GLM	QTN-sf0406238872	T/G	4	6238872	4.6553e-09
Grain_env1_r1	GLM	QTN-sf0406239250	A/C	4	6239250	2.7971e-08
Grain_env1_r1	GLM	QTN-sf0406239392	A/G	4	6239392	5.8258e-08
Grain_env1_r1	GLM	QTN-sf0406239465	T/C	4	6239465	7.7138e-08
Grain_env1_r1	GLM	QTN-sf0406239533	A/G	4	6239533	2.0005e-07
Grain_env1_r1	GLM	QTN-sf0406239583	G/C	4	6239583	2.9416e-08
Grain_env1_r1	GLM	QTN-sf0406239780	T/C	4	6239780	2.2606e-07
Grain_env1_r1	GLM	QTN-sf0406239813	A/G	4	6239813	3.093e-08
Grain_env1_r1	GLM	QTN-sf0406240021	G/A	4	6240021	6.7307e-08
Grain_env1_r1	GLM	QTN-sf0406240022	T/C	4	6240022	1.3649e-07
Grain_env1_r1	GLM	QTN-sf0406241058	T/C	4	6241058	1.0396e-08
Grain_env1_r1	GLM	QTN-sf0406241270	A/T	4	6241270	1.9763e-08
Grain_env1_r1	GLM	QTN-sf0406241494	A/G	4	6241494	1.499e-09
Grain_env1_r1	GLM	QTN-sf0406241656	A/G	4	6241656	1.9563e-08
Grain_env1_r1	GLM	QTN-sf0406241664	T/C	4	6241664	2.858e-08
Grain_env1_r1	GLM	QTN-sf0406241969	T/G	4	6241969	7.2347e-08
Grain_env1_r1	GLM	QTN-sf0406242525	T/C	4	6242525	6.3879e-09
Grain_env1_r1	GLM	QTN-sf0406242802	A/G	4	6242802	3.8015e-08
Grain_env1_r1	GLM	QTN-sf0406242969	T/C	4	6242969	7.5033e-08
Grain_env1_r1	GLM	QTN-sf0406243649	A/T	4	6243649	6.9101e-08
Grain_env1_r1	GLM	QTN-sf0406243650	A/G	4	6243650	6.9101e-08
Grain_env1_r1	GLM	QTN-sf0406243967	T/C	4	6243967	5.2355e-08
Grain_env1_r1	GLM	QTN-sf0406243968	A/G	4	6243968	1.1893e-08
Grain_env1_r1	GLM	QTN-sf0406244096	T/A	4	6244096	2.3416e-07
Grain_env1_r1	GLM	QTN-sf0406244109	T/C	4	6244109	2.034e-07
Grain_env1_r1	GLM	QTN-sf0406244391	T/C	4	6244391	3.7524e-08
Grain_env1_r1	GLM	QTN-sf0406244641	A/T	4	6244641	8.6512e-08
Grain_env1_r1	GLM	QTN-sf0406245280	T/G	4	6245280	7.4988e-08
Grain_env1_r1	GLM	QTN-sf0406245369	A/C	4	6245369	8.3086e-08
Grain_env1_r1	GLM	QTN-sf0406245378	A/T	4	6245378	2.556e-07
Grain_env1_r1	GLM	QTN-sf0406245477	T/A	4	6245477	7.611e-08
Grain_env1_r1	GLM	QTN-sf0406247450	A/T	4	6247450	3.2535e-08
Grain_env1_r1	GLM	QTN-sf0406250684	A/G	4	6250684	2.9803e-08
Grain_env1_r1	GLM	QTN-sf0406250835	T/C	4	6250835	3.2252e-08
Grain_env1_r1	GLM	QTN-sf0406251517	C/T	4	6251517	3.5009e-08
Grain_env1_r1	GLM	QTN-sf0406251931	G/A	4	6251931	6.7454e-08
Grain_env1_r1	GLM	QTN-sf0406252066	A/G	4	6252066	2.3382e-08
Grain_env1_r1	GLM	QTN-sf0406252256	T/C	4	6252256	1.4954e-07
Grain_env1_r1	GLM	QTN-sf0406252891	C/T	4	6252891	3.4484e-08
Grain_env1_r1	GLM	QTN-sf0406253020	T/C	4	6253020	7.6101e-09
Grain_env1_r1	GLM	QTN-sf0406254191	A/G	4	6254191	1.458e-07
Grain_env1_r1	GLM	QTN-sf0406254261	G/A	4	6254261	2.2607e-07
Grain_env1_r1	GLM	QTN-sf0406255046	A/G	4	6255046	1.9031e-08
Grain_env1_r1	GLM	QTN-sf0406255358	A/G	4	6255358	1.8788e-07
Grain_env1_r1	GLM	QTN-sf0406255444	A/G	4	6255444	6.3211e-08
Grain_env1_r1	GLM	QTN-sf0406255684	A/T	4	6255684	6.2842e-08
Grain_env1_r1	GLM	QTN-sf0406255697	A/C	4	6255697	1.0049e-07
Grain_env1_r1	GLM	QTN-sf0406257083	A/C	4	6257083	6.3139e-08
Grain_env1_r1	GLM	QTN-sf0406258867	G/C	4	6258867	7.7914e-08
Grain_env1_r1	GLM	QTN-sf0406259621	A/C	4	6259621	5.4271e-08
Grain_env1_r1	GLM	QTN-sf0406260198	A/G	4	6260198	1.3998e-08
Grain_env1_r1	GLM	QTN-sf0406260378	A/G	4	6260378	4.7953e-08
Grain_env1_r1	GLM	QTN-sf0406260400	C/G	4	6260400	1.9492e-08
Grain_env1_r1	GLM	QTN-sf0406260719	A/G	4	6260719	4.4543e-08
Grain_env1_r1	GLM	QTN-sf0406260841	T/G	4	6260841	6.1064e-08
Grain_env1_r1	GLM	QTN-sf0406261099	C/A	4	6261099	1.6627e-07
Grain_env1_r1	GLM	QTN-sf0406261343	T/C	4	6261343	1.8449e-08
Grain_env1_r1	GLM	QTN-sf0406262108	A/G	4	6262108	3.9903e-08
Grain_env1_r1	GLM	QTN-sf0406262588	T/C	4	6262588	3.4156e-08
Grain_env1_r1	GLM	QTN-sf0406263288	A/G	4	6263288	1.8543e-07
Grain_env1_r1	GLM	QTN-sf0406263683	T/C	4	6263683	4.9612e-08
Grain_env1_r1	GLM	QTN-sf0406264995	G/A	4	6264995	4.172e-08
Grain_env1_r1	GLM	QTN-sf0406265043	T/C	4	6265043	3.1291e-08
Grain_env1_r1	GLM	QTN-sf0406265055	C/T	4	6265055	2.7329e-07
Grain_env1_r1	GLM	QTN-sf0406265101	A/G	4	6265101	7.8517e-08
Grain_env1_r1	GLM	QTN-sf0406265880	A/G	4	6265880	1.449e-07
Grain_env1_r1	GLM	QTN-sf0406266562	T/A	4	6266562	1.5006e-08
Grain_env1_r1	GLM	QTN-sf0406266696	G/A	4	6266696	1.5142e-07
Grain_env1_r1	GLM	QTN-sf0406266805	A/C	4	6266805	1.3571e-07
Grain_env1_r1	GLM	QTN-sf0406267398	C/T	4	6267398	5.589e-08
Grain_env1_r1	GLM	QTN-sf0406267576	T/C	4	6267576	2.9256e-07
Grain_env1_r1	GLM	QTN-sf0406267638	A/G	4	6267638	9.2164e-08
Grain_env1_r1	GLM	QTN-sf0406268346	C/T	4	6268346	3.5703e-08
Grain_env1_r1	GLM	QTN-sf0406268676	A/G	4	6268676	1.4201e-07
Grain_env1_r1	GLM	QTN-sf0406269313	T/C	4	6269313	3.405e-08
Grain_env1_r1	GLM	QTN-sf0406269425	A/T	4	6269425	7.3345e-08
Grain_env1_r1	GLM	QTN-sf0406269767	G/A	4	6269767	5.9687e-08
Grain_env1_r1	GLM	QTN-sf0406269958	T/C	4	6269958	4.5644e-08
Grain_env1_r1	GLM	QTN-sf0406271372	C/T	4	6271372	1.2005e-07
Grain_env1_r1	GLM	QTN-sf0406271399	T/C	4	6271399	8.322e-08
Grain_env1_r1	GLM	QTN-sf0406271418	A/T	4	6271418	6.8152e-08
Grain_env1_r1	GLM	QTN-sf0406271616	A/T	4	6271616	1.3272e-07
Grain_env1_r1	GLM	QTN-sf0406271688	A/G	4	6271688	1.2918e-07
Grain_env1_r1	GLM	QTN-sf0406272215	A/G	4	6272215	4.4164e-08
Grain_env1_r1	GLM	QTN-sf0406272266	A/G	4	6272266	1.6587e-08
Grain_env1_r1	GLM	QTN-sf0406272294	T/C	4	6272294	1.6587e-08
Grain_env1_r1	GLM	QTN-sf0406272388	T/C	4	6272388	1.7366e-07
Grain_env1_r1	GLM	QTN-sf0406272676	T/C	4	6272676	1.0961e-07
Grain_env1_r1	GLM	QTN-sf0406272744	T/C	4	6272744	2.9861e-07
Grain_env1_r1	GLM	QTN-sf0406272807	A/G	4	6272807	2.5484e-07
Grain_env1_r1	GLM	QTN-sf0406273235	T/C	4	6273235	3.9038e-08
Grain_env1_r1	GLM	QTN-sf0406273244	T/C	4	6273244	7.2069e-08
Grain_env1_r1	GLM	QTN-sf0406273261	A/G	4	6273261	7.2069e-08
Grain_env1_r1	GLM	QTN-sf0406273270	T/C	4	6273270	7.2069e-08
Grain_env1_r1	GLM	QTN-sf0406273286	T/C	4	6273286	2.3886e-07
Grain_env1_r1	GLM	QTN-sf0406273431	T/C	4	6273431	4.1251e-08
Grain_env1_r1	GLM	QTN-sf0406273515	A/G	4	6273515	1.0803e-07
Grain_env1_r1	GLM	QTN-sf0406273561	A/G	4	6273561	8.1235e-08
Grain_env1_r1	GLM	QTN-sf0406273704	G/C	4	6273704	2.8393e-08
Grain_env1_r1	GLM	QTN-sf0406273822	A/G	4	6273822	1.8239e-07
Grain_env1_r1	GLM	QTN-sf0406273871	A/G	4	6273871	1.8277e-07
Grain_env1_r1	GLM	QTN-sf0406273963	T/C	4	6273963	1.124e-07
Grain_env1_r1	GLM	QTN-sf0406274027	A/C	4	6274027	2.4749e-08
Grain_env1_r1	GLM	QTN-sf0406274070	A/G	4	6274070	6.9566e-08
Grain_env1_r1	GLM	QTN-sf0406274261	A/G	4	6274261	7.19e-08
Grain_env1_r1	GLM	QTN-sf0406274429	A/G	4	6274429	5.3077e-08
Grain_env1_r1	GLM	QTN-sf0406274442	C/T	4	6274442	5.3077e-08
Grain_env1_r1	GLM	QTN-sf0406274685	A/G	4	6274685	1.1966e-08
Grain_env1_r1	GLM	QTN-sf0406274802	A/T	4	6274802	8.6602e-08
Grain_env1_r1	GLM	QTN-sf0406274912	T/C	4	6274912	1.237e-07
Grain_env1_r1	GLM	QTN-sf0406275117	A/G	4	6275117	1.4859e-07
Grain_env1_r1	GLM	QTN-sf0406275317	T/C	4	6275317	5.0049e-08
Grain_env1_r1	GLM	QTN-sf0406275465	T/C	4	6275465	1.8337e-07
Grain_env1_r1	GLM	QTN-sf0406275537	A/T	4	6275537	9.0674e-08
Grain_env1_r1	GLM	QTN-sf0406275591	G/A	4	6275591	2.5207e-07
Grain_env1_r1	GLM	QTN-sf0406275858	T/G	4	6275858	3.4991e-09
Grain_env1_r1	GLM	QTN-sf0406275862	A/G	4	6275862	3.4991e-09
Grain_env1_r1	GLM	QTN-sf0406275925	C/T	4	6275925	1.2015e-08
Grain_env1_r1	GLM	QTN-sf0406276016	A/G	4	6276016	1.8038e-08
Grain_env1_r1	GLM	QTN-sf0406276426	A/G	4	6276426	1.8038e-08
Grain_env1_r1	GLM	QTN-sf0406276464	A/G	4	6276464	1.8038e-08
Grain_env1_r1	GLM	QTN-sf0406276584	T/C	4	6276584	1.8038e-08
Grain_env1_r1	GLM	QTN-sf0406276589	A/G	4	6276589	1.2859e-07
Grain_env1_r1	GLM	QTN-sf0406276701	T/C	4	6276701	1.8038e-08
Grain_env1_r1	GLM	QTN-sf0406276894	T/C	4	6276894	9.0674e-08
Grain_env1_r1	GLM	QTN-sf0406276971	T/G	4	6276971	9.0674e-08
Grain_env1_r1	GLM	QTN-sf0406277210	C/G	4	6277210	2.3235e-09
Grain_env1_r1	GLM	QTN-sf0406277447	T/C	4	6277447	9.2573e-08
Grain_env1_r1	GLM	QTN-sf0406277660	T/C	4	6277660	1.1966e-08
Grain_env1_r1	GLM	QTN-sf0406277841	T/C	4	6277841	1.1966e-08
Grain_env1_r1	GLM	QTN-sf0406277872	A/T	4	6277872	1.1966e-08
Grain_env1_r1	GLM	QTN-sf0406277999	A/G	4	6277999	2.1677e-07
Grain_env1_r1	GLM	QTN-sf0406278119	T/C	4	6278119	1.6546e-07
Grain_env1_r1	GLM	QTN-sf0406278453	T/G	4	6278453	1.3113e-07
Grain_env1_r1	GLM	QTN-sf0406278733	A/G	4	6278733	6.1889e-08
Grain_env1_r1	GLM	QTN-sf0406278872	A/G	4	6278872	1.3342e-07
Grain_env1_r1	GLM	QTN-sf0406278955	A/G	4	6278955	2.6607e-07
Grain_env1_r1	GLM	QTN-sf0406279255	T/C	4	6279255	8.8596e-08
Grain_env1_r1	GLM	QTN-sf0406279540	T/C	4	6279540	2.4321e-07
Grain_env1_r1	GLM	QTN-sf0406279644	A/G	4	6279644	8.8596e-08
Grain_env1_r1	GLM	QTN-sf0406279661	A/G	4	6279661	2.7168e-07
Grain_env1_r1	GLM	QTN-sf0406279666	T/C	4	6279666	2.7168e-07
Grain_env1_r1	GLM	QTN-sf0406280518	A/G	4	6280518	1.3516e-07
Grain_env1_r1	GLM	QTN-sf0406280589	T/C	4	6280589	2.0267e-07
Grain_env1_r1	GLM	QTN-sf0406280879	A/G	4	6280879	3.0167e-07
Grain_env1_r1	GLM	QTN-sf0406280880	A/C	4	6280880	3.0167e-07
Grain_env1_r1	GLM	QTN-sf0406280908	A/C	4	6280908	1.8248e-07
Grain_env1_r1	GLM	QTN-sf0406281004	A/G	4	6281004	3.3736e-08
Grain_env1_r1	GLM	QTN-sf0406281668	T/C	4	6281668	2.1732e-07
Grain_env1_r1	GLM	QTN-sf0406281741	T/C	4	6281741	1.1773e-07
Grain_env1_r1	GLM	QTN-sf0406281767	T/C	4	6281767	1.1773e-07
Grain_env1_r1	GLM	QTN-sf0406281845	T/C	4	6281845	2.6407e-07
Grain_env1_r1	GLM	QTN-sf0406281857	T/C	4	6281857	2.1786e-07
Grain_env1_r1	GLM	QTN-sf0406282694	T/C	4	6282694	1.947e-07
Grain_env1_r1	GLM	QTN-sf0406282903	T/C	4	6282903	7.1465e-08
Grain_env1_r1	GLM	QTN-sf0406283062	A/G	4	6283062	7.0116e-08
Grain_env1_r1	GLM	QTN-sf0406283152	T/C	4	6283152	7.6937e-08
Grain_env1_r1	GLM	QTN-sf0406283191	T/C	4	6283191	8.5621e-08
Grain_env1_r1	GLM	QTN-sf0406283231	A/G	4	6283231	8.5621e-08
Grain_env1_r1	GLM	QTN-sf0406283272	T/C	4	6283272	7.9997e-08
Grain_env1_r1	GLM	QTN-sf0406283506	T/C	4	6283506	1.0023e-07
Grain_env1_r1	GLM	QTN-sf0406284089	A/G	4	6284089	4.1136e-08
Grain_env1_r1	GLM	QTN-sf0406284378	C/G	4	6284378	1.6419e-07
Grain_env1_r1	GLM	QTN-sf0406284411	A/G	4	6284411	4.7921e-08
Grain_env1_r1	GLM	QTN-sf0406284512	G/A	4	6284512	9.0505e-08
Grain_env1_r1	GLM	QTN-sf0406284791	A/G	4	6284791	1.1966e-08
Grain_env1_r1	GLM	QTN-sf0406285528	T/G	4	6285528	1.3474e-07
Grain_env1_r1	GLM	QTN-sf0406285608	A/G	4	6285608	3.6689e-08
Grain_env1_r1	GLM	QTN-sf0406285810	T/C	4	6285810	9.003e-08
Grain_env1_r1	GLM	QTN-sf0406285936	T/C	4	6285936	1.5402e-07
Grain_env1_r1	GLM	QTN-sf0406285946	A/G	4	6285946	1.9189e-07
Grain_env1_r1	GLM	QTN-sf0406286290	T/C	4	6286290	1.0936e-07
Grain_env1_r1	GLM	QTN-sf0406286393	T/C	4	6286393	3.4723e-08
Grain_env1_r1	GLM	QTN-sf0406286410	T/C	4	6286410	5.2083e-08
Grain_env1_r1	GLM	QTN-sf0406286597	G/A	4	6286597	1.0053e-07
Grain_env1_r1	GLM	QTN-sf0406286614	C/G	4	6286614	7.306e-08
Grain_env1_r1	GLM	QTN-sf0406288740	A/G	4	6288740	2.2617e-08
Grain_env1_r1	GLM	QTN-sf0406289069	A/G	4	6289069	6.6414e-08
Grain_env1_r1	GLM	QTN-sf0406289074	G/C	4	6289074	6.6414e-08
Grain_env1_r1	GLM	QTN-sf0406290387	C/T	4	6290387	8.4791e-08
Grain_env1_r1	GLM	QTN-sf0406290478	T/C	4	6290478	5.2377e-08
Grain_env1_r1	GLM	QTN-sf0406290494	C/T	4	6290494	4.5582e-08
Grain_env1_r1	GLM	QTN-sf0406291006	G/T	4	6291006	7.1608e-08
Grain_env1_r1	GLM	QTN-sf0406291011	T/C	4	6291011	7.1608e-08
Grain_env1_r1	GLM	QTN-sf0406291016	A/G	4	6291016	7.1608e-08
Grain_env1_r1	GLM	QTN-sf0406291593	T/C	4	6291593	4.6661e-08
Grain_env1_r1	GLM	QTN-sf0406292212	T/C	4	6292212	1.7798e-08
Grain_env1_r1	GLM	QTN-sf0406292260	A/G	4	6292260	6.59e-08
Grain_env1_r1	GLM	QTN-sf0406292544	C/G	4	6292544	6.59e-08
Grain_env1_r1	GLM	QTN-sf0406292665	T/C	4	6292665	1.8259e-07
Grain_env1_r1	GLM	QTN-sf0406293469	C/T	4	6293469	4.8293e-08
Grain_env1_r1	GLM	QTN-sf0406293869	T/C	4	6293869	9.0674e-08
Grain_env1_r1	GLM	QTN-sf0406293880	T/C	4	6293880	9.0674e-08
Grain_env1_r1	GLM	QTN-sf0406294547	T/C	4	6294547	1.3474e-07
Grain_env1_r1	GLM	QTN-sf0406294658	A/G	4	6294658	1.8267e-07
Grain_env1_r1	GLM	QTN-sf0406294692	A/G	4	6294692	1.8063e-07
Grain_env1_r1	GLM	QTN-sf0406295248	T/G	4	6295248	6.1966e-08
Grain_env1_r1	GLM	QTN-sf0406296309	T/G	4	6296309	1.6948e-07
Grain_env1_r1	GLM	QTN-sf0406296768	A/G	4	6296768	9.5107e-08
Grain_env1_r1	GLM	QTN-sf0406296990	T/C	4	6296990	9.0505e-08
Grain_env1_r1	GLM	QTN-sf0406297409	A/G	4	6297409	8.7468e-08
Grain_env1_r1	GLM	QTN-sf0406297784	T/C	4	6297784	4.6633e-08
Grain_env1_r1	GLM	QTN-sf0406298898	G/A	4	6298898	4.9311e-08
Grain_env1_r1	GLM	QTN-sf0406299169	C/T	4	6299169	8.7238e-08
Grain_env1_r1	GLM	QTN-sf0406299260	G/A	4	6299260	1.3454e-07
Grain_env1_r1	GLM	QTN-sf0406299519	T/C	4	6299519	1.3274e-07
Grain_env1_r1	GLM	QTN-sf0406299579	T/A	4	6299579	9.0674e-08
Grain_env1_r1	GLM	QTN-sf0406299994	G/C	4	6299994	8.902e-08
Grain_env1_r1	GLM	QTN-sf0406300569	A/G	4	6300569	7.613e-08
Grain_env1_r1	GLM	QTN-sf0406301057	A/G	4	6301057	1.0152e-07
Grain_env1_r1	GLM	QTN-sf0406302287	C/T	4	6302287	9.5761e-08
Grain_env1_r1	GLM	QTN-sf0406302918	C/T	4	6302918	1.3057e-07
Grain_env1_r1	GLM	QTN-sf0406304384	C/A	4	6304384	1.3822e-07
Grain_env1_r1	GLM	QTN-sf0406304451	T/G	4	6304451	2.2999e-07
Grain_env1_r1	GLM	QTN-sf0406304520	G/A	4	6304520	2.3025e-07
Grain_env1_r1	GLM	QTN-sf0406304790	T/C	4	6304790	1.3118e-07
Grain_env1_r1	GLM	QTN-sf0406305806	G/A	4	6305806	1.4328e-07
Grain_env1_r1	GLM	QTN-sf0406307233	A/G	4	6307233	4.971e-08
Grain_env1_r1	GLM	QTN-sf0406307255	A/G	4	6307255	3.1383e-08
Grain_env1_r1	GLM	QTN-sf0406307448	G/A	4	6307448	6.5472e-09
Grain_env1_r1	GLM	QTN-sf0406307643	T/G	4	6307643	5.0527e-08
Grain_env1_r1	GLM	QTN-sf0406307992	T/C	4	6307992	8.8039e-08
Grain_env1_r1	GLM	QTN-sf0406310588	T/C	4	6310588	1.4148e-07
Grain_env1_r1	GLM	QTN-sf0406310609	C/A	4	6310609	1.4148e-07
Grain_env1_r1	GLM	QTN-sf0406310757	T/C	4	6310757	1.5813e-07
Grain_env1_r1	GLM	QTN-sf0406312872	T/C	4	6312872	1.6771e-07
Grain_env1_r1	GLM	QTN-sf0406313038	A/G	4	6313038	5.5822e-08
Grain_env1_r1	GLM	QTN-sf0406313913	T/G	4	6313913	1.4963e-07
Grain_env1_r1	GLM	QTN-sf0406314306	T/C	4	6314306	1.3498e-07
Grain_env1_r1	GLM	QTN-sf0406314485	T/A	4	6314485	2.2709e-07
Grain_env1_r1	GLM	QTN-sf0406314787	C/T	4	6314787	9.7191e-08
Grain_env1_r1	GLM	QTN-sf0406315840	A/G	4	6315840	5.7486e-08
Grain_env1_r1	GLM	QTN-sf0406316316	T/C	4	6316316	2.4305e-07
Grain_env1_r1	GLM	QTN-sf0406316983	G/A	4	6316983	2.8446e-08
Grain_env1_r1	GLM	QTN-sf0406317378	A/G	4	6317378	2.2629e-08
Grain_env1_r1	GLM	QTN-sf0406317416	A/G	4	6317416	7.2839e-08
Grain_env1_r1	GLM	QTN-sf0406317849	T/A	4	6317849	1.6091e-07
Grain_env1_r1	GLM	QTN-sf0406319936	A/T	4	6319936	2.1265e-07
Grain_env1_r1	GLM	QTN-sf0406320358	G/T	4	6320358	1.4824e-07
Grain_env1_r1	GLM	QTN-sf0406321140	A/C	4	6321140	1.4577e-07
Grain_env1_r1	GLM	QTN-sf0406321790	T/C	4	6321790	1.8438e-07
Grain_env1_r1	GLM	QTN-sf0406322393	G/T	4	6322393	6.3248e-08
Grain_env1_r1	GLM	QTN-sf0406336682	A/T	4	6336682	1.0571e-07
Grain_env1_r1	GLM	QTN-sf0406336965	A/G	4	6336965	1.1603e-07
Grain_env1_r1	GLM	QTN-sf0406337895	A/G	4	6337895	1.656e-07
Grain_env1_r1	GLM	QTN-sf0406338188	T/C	4	6338188	7.9058e-08
Grain_env1_r1	GLM	QTN-sf0406338733	A/C	4	6338733	7.1869e-08
Grain_env1_r1	GLM	QTN-sf0406339123	A/G	4	6339123	3.1334e-07
Grain_env1_r1	GLM	QTN-sf0406339159	A/C	4	6339159	7.159e-08
Grain_env1_r1	GLM	QTN-sf0406340442	A/G	4	6340442	2.6574e-08
Grain_env1_r1	GLM	QTN-sf0406341316	C/G	4	6341316	1.7065e-07
Grain_env1_r1	GLM	QTN-sf0406341474	A/G	4	6341474	2.0075e-07
Grain_env1_r1	GLM	QTN-sf0406341808	T/C	4	6341808	8.234e-08
Grain_env1_r1	GLM	QTN-sf0406342075	A/G	4	6342075	4.7479e-08
Grain_env1_r1	GLM	QTN-sf0406342588	A/G	4	6342588	2.666e-07
Grain_env1_r1	GLM	QTN-sf0406346078	C/G	4	6346078	1.4202e-07
Grain_env1_r1	GLM	QTN-sf0406346489	A/G	4	6346489	7.2874e-08
Grain_env1_r1	GLM	QTN-sf0406347499	C/G	4	6347499	1.2131e-07
Grain_env1_r1	GLM	QTN-sf0406347841	C/T	4	6347841	2.7232e-07
Grain_env1_r1	GLM	QTN-sf0406348073	A/G	4	6348073	6.7254e-08
Grain_env1_r1	GLM	QTN-sf0406348503	A/G	4	6348503	1.1628e-07
Grain_env1_r1	GLM	QTN-sf0406349195	T/C	4	6349195	8.1667e-09
Grain_env1_r1	GLM	QTN-sf0406350161	A/G	4	6350161	1.1e-07
Grain_env1_r1	GLM	QTN-sf0406350274	T/C	4	6350274	3.1539e-08
Grain_env1_r1	GLM	QTN-sf0406350521	A/G	4	6350521	9.9042e-08
Grain_env1_r1	GLM	QTN-sf0406350524	A/G	4	6350524	3.8902e-08
Grain_env1_r1	GLM	QTN-sf0406350942	A/G	4	6350942	2.3654e-07
Grain_env1_r1	GLM	QTN-sf0406350973	A/G	4	6350973	2.963e-07
Grain_env1_r1	GLM	QTN-sf0406351656	C/G	4	6351656	2.8925e-07
Grain_env1_r1	GLM	QTN-sf0406351961	C/T	4	6351961	1.6101e-07
Grain_env1_r1	GLM	QTN-sf0406352785	T/C	4	6352785	5.0778e-08
Grain_env1_r1	GLM	QTN-sf0406352838	T/C	4	6352838	2.0842e-07
Grain_env1_r1	GLM	QTN-sf0406356637	T/C	4	6356637	1.6535e-07
Grain_env1_r1	GLM	QTN-sf0406356683	A/G	4	6356683	1.8763e-07
Grain_env1_r1	GLM	QTN-sf0406358133	A/G	4	6358133	2.0934e-07
Grain_env1_r1	GLM	QTN-sf0406359406	T/C	4	6359406	1.6679e-07
Grain_env1_r1	GLM	QTN-sf0406359997	A/T	4	6359997	1.8793e-07
Grain_env1_r1	GLM	QTN-sf0406360548	T/A	4	6360548	3.1493e-07
Grain_env1_r1	GLM	QTN-sf0406361783	T/C	4	6361783	7.6911e-08
Grain_env1_r1	GLM	QTN-sf0406361890	C/T	4	6361890	1.7813e-08
Grain_env1_r1	GLM	QTN-sf0406362481	A/C	4	6362481	3.4396e-08
Grain_env1_r1	GLM	QTN-sf0406362566	T/A	4	6362566	3.14e-08
Grain_env1_r1	GLM	QTN-sf0406363105	T/C	4	6363105	2.6361e-07
Grain_env1_r1	GLM	QTN-sf0406363187	G/C	4	6363187	2.3543e-08
Grain_env1_r1	GLM	QTN-sf0406363302	T/C	4	6363302	1.2984e-07
Grain_env1_r1	GLM	QTN-sf0406363320	C/G	4	6363320	3.3614e-08
Grain_env1_r1	GLM	QTN-sf0406363468	T/C	4	6363468	2.5012e-07
Grain_env1_r1	GLM	QTN-sf0406363832	C/T	4	6363832	2.3152e-07
Grain_env1_r1	GLM	QTN-sf0406364171	T/C	4	6364171	5.8253e-08
Grain_env1_r1	GLM	QTN-sf0406364522	T/A	4	6364522	1.2132e-07
Grain_env1_r1	GLM	QTN-sf0406364690	C/T	4	6364690	8.4016e-08
Grain_env1_r1	GLM	QTN-sf0406364778	A/G	4	6364778	2.3152e-07
Grain_env1_r1	GLM	QTN-sf0406365268	A/G	4	6365268	1.4184e-07
Grain_env1_r1	GLM	QTN-sf0406365428	C/T	4	6365428	2.6554e-07
Grain_env1_r1	GLM	QTN-sf0406366587	C/T	4	6366587	3.0929e-07
Grain_env1_r1	GLM	QTN-sf0406366765	A/G	4	6366765	1.1572e-07
Grain_env1_r1	GLM	QTN-sf0406366802	A/G	4	6366802	2.786e-07
Grain_env1_r1	GLM	QTN-sf0406368064	T/G	4	6368064	9.5913e-08
Grain_env1_r1	GLM	QTN-sf0406368687	A/T	4	6368687	5.9129e-08
Grain_env1_r1	GLM	QTN-sf0406368795	A/G	4	6368795	2.9828e-07
Grain_env1_r1	GLM	QTN-sf0406368830	T/C	4	6368830	4.1083e-08
Grain_env1_r1	GLM	QTN-sf0406369014	C/T	4	6369014	1.2222e-07
Grain_env1_r1	GLM	QTN-sf0406369228	G/C	4	6369228	1.2019e-07
Grain_env1_r1	GLM	QTN-sf0406369469	T/G	4	6369469	2.9549e-07
Grain_env1_r1	GLM	QTN-sf0406371095	T/A	4	6371095	1.951e-07
Grain_env1_r1	GLM	QTN-sf0406371389	C/A	4	6371389	2.5976e-07
Grain_env1_r1	GLM	QTN-sf0406371457	G/A	4	6371457	1.3624e-07
Grain_env1_r1	GLM	QTN-sf0406371494	T/G	4	6371494	2.8102e-07
Grain_env1_r1	GLM	QTN-sf0406372146	T/G	4	6372146	2.5061e-07
Grain_env1_r1	GLM	QTN-sf0406372147	A/G	4	6372147	2.5061e-07
Grain_env1_r1	GLM	QTN-sf0406372233	A/T	4	6372233	1.2629e-07
Grain_env1_r1	GLM	QTN-sf0406372904	A/G	4	6372904	1.0788e-07
Grain_env1_r1	GLM	QTN-sf0406372957	A/G	4	6372957	1.1402e-07
Grain_env1_r1	GLM	QTN-sf0406374516	A/T	4	6374516	1.654e-07
Grain_env1_r1	GLM	QTN-sf0406374596	C/T	4	6374596	2.2556e-07
Grain_env1_r1	GLM	QTN-sf0406374615	T/G	4	6374615	1.5446e-07
Grain_env1_r1	GLM	QTN-sf0406374715	T/C	4	6374715	2.3514e-08
Grain_env1_r1	GLM	QTN-sf0406377002	C/A	4	6377002	1.5936e-07
Grain_env1_r1	GLM	QTN-sf0406377410	C/G	4	6377410	1.4209e-07
Grain_env1_r1	GLM	QTN-sf0406377641	C/T	4	6377641	9.5822e-08
Grain_env1_r1	GLM	QTN-sf0406378370	A/G	4	6378370	7.7467e-08
Grain_env1_r1	GLM	QTN-sf0406378447	G/A	4	6378447	1.6884e-07
Grain_env1_r1	GLM	QTN-sf0406378617	A/G	4	6378617	1.4308e-08
Grain_env1_r1	GLM	QTN-sf0406379052	T/C	4	6379052	9.2121e-08
Grain_env1_r1	GLM	QTN-sf0406379098	A/G	4	6379098	1.8486e-07
Grain_env1_r1	GLM	QTN-sf0406379153	T/C	4	6379153	2.8575e-07
Grain_env1_r1	GLM	QTN-sf0406383661	A/G	4	6383661	1.0947e-07
Grain_env1_r1	GLM	QTN-sf0406383883	C/G	4	6383883	1.9855e-07
Grain_env1_r1	GLM	QTN-sf0406384020	A/G	4	6384020	3.0929e-07
Grain_env1_r1	GLM	QTN-sf0406384244	T/G	4	6384244	1.932e-07
Grain_env1_r1	GLM	QTN-sf0406384280	C/G	4	6384280	1.6772e-07
Grain_env1_r1	GLM	QTN-sf0406384529	A/G	4	6384529	2.5409e-07
Grain_env1_r1	GLM	QTN-sf0406384601	T/C	4	6384601	7.5514e-08
Grain_env1_r1	GLM	QTN-sf0406384735	T/C	4	6384735	1.5235e-07
Grain_env1_r1	GLM	QTN-sf0406384865	A/G	4	6384865	5.4496e-08
Grain_env1_r1	GLM	QTN-sf0406385509	A/G	4	6385509	5.8289e-08
Grain_env1_r1	GLM	QTN-sf0406386077	A/G	4	6386077	9.9545e-08
Grain_env1_r1	GLM	QTN-sf0406386131	A/G	4	6386131	2.655e-08
Grain_env1_r1	GLM	QTN-sf0406386980	A/G	4	6386980	7.0375e-08
Grain_env1_r1	GLM	QTN-sf0406387155	T/C	4	6387155	2.1775e-07
Grain_env1_r1	GLM	QTN-sf0406387628	C/G	4	6387628	1.0579e-07
Grain_env1_r1	GLM	QTN-sf0406390193	G/A	4	6390193	1.8228e-07
Grain_env1_r1	GLM	QTN-sf0406390579	A/G	4	6390579	2.3368e-07
Grain_env1_r1	GLM	QTN-sf0406390807	T/C	4	6390807	2.0804e-07
Grain_env1_r1	GLM	QTN-sf0406390946	T/C	4	6390946	9.5963e-08
Grain_env1_r1	GLM	QTN-sf0406390961	A/G	4	6390961	1.4471e-07
Grain_env1_r1	GLM	QTN-sf0406391161	T/C	4	6391161	1.2883e-07
Grain_env1_r1	GLM	QTN-sf0406391186	T/C	4	6391186	9.9545e-08
Grain_env1_r1	GLM	QTN-sf0406391221	G/C	4	6391221	9.9545e-08
Grain_env1_r1	GLM	QTN-sf0406391326	T/C	4	6391326	2.3518e-07
Grain_env1_r1	GLM	QTN-sf0406391399	T/C	4	6391399	2.9646e-07
Grain_env1_r1	GLM	QTN-sf0406392485	G/A	4	6392485	6.4029e-08
Grain_env1_r1	GLM	QTN-sf0406392506	T/A	4	6392506	8.5836e-08
Grain_env1_r1	GLM	QTN-sf0406392529	C/A	4	6392529	1.4449e-08
Grain_env1_r1	GLM	QTN-sf0406392894	G/C	4	6392894	1.3311e-07
Grain_env1_r1	GLM	QTN-sf0406392897	T/G	4	6392897	9.9545e-08
Grain_env1_r1	GLM	QTN-sf0406394150	G/T	4	6394150	2.1907e-07
Grain_env1_r1	GLM	QTN-sf0406394554	C/A	4	6394554	1.7146e-07
Grain_env1_r1	GLM	QTN-sf0406394782	A/G	4	6394782	1.585e-07
Grain_env1_r1	GLM	QTN-sf0406394836	A/G	4	6394836	2.3553e-07
Grain_env1_r1	GLM	QTN-sf0406397422	T/C	4	6397422	1.508e-07
Grain_env1_r1	GLM	QTN-sf0406397912	T/C	4	6397912	1.7579e-07
Grain_env1_r1	GLM	QTN-sf0406398514	T/C	4	6398514	1.855e-07
Grain_env1_r1	GLM	QTN-sf0406398563	T/G	4	6398563	1.7893e-07
Grain_env1_r1	GLM	QTN-sf0406398631	A/G	4	6398631	3.1072e-07
Grain_env1_r1	GLM	QTN-sf0406399058	A/G	4	6399058	1.4537e-07
Grain_env1_r1	GLM	QTN-sf0406399186	G/C	4	6399186	7.2416e-08
Grain_env1_r1	GLM	QTN-sf0406399343	C/T	4	6399343	1.9055e-07
Grain_env1_r1	GLM	QTN-sf0406399491	A/G	4	6399491	1.8735e-07
Grain_env1_r1	GLM	QTN-sf0406399629	T/C	4	6399629	3.5971e-08
Grain_env1_r1	GLM	QTN-sf0406399688	A/G	4	6399688	1.8457e-07
Grain_env1_r1	GLM	QTN-sf0406400063	T/C	4	6400063	1.7905e-07
Grain_env1_r1	GLM	QTN-sf0406400902	A/G	4	6400902	1.8735e-07
Grain_env1_r1	GLM	QTN-sf0406400907	T/C	4	6400907	2.1565e-07
Grain_env1_r1	GLM	QTN-sf0406402018	T/A	4	6402018	2.9036e-07
Grain_env1_r1	GLM	QTN-sf0406402343	A/G	4	6402343	2.0029e-07
Grain_env1_r1	GLM	QTN-sf0406402474	T/C	4	6402474	2.1947e-07
Grain_env1_r1	GLM	QTN-sf0406403857	A/G	4	6403857	4.9331e-08
Grain_env1_r1	GLM	QTN-sf0406403923	T/C	4	6403923	2.9286e-07
Grain_env1_r1	GLM	QTN-sf0406404202	T/C	4	6404202	8.3906e-08
Grain_env1_r1	GLM	QTN-sf0406404261	A/G	4	6404261	2.4599e-07
Grain_env1_r1	GLM	QTN-sf0406404538	C/G	4	6404538	2.4541e-07
Grain_env1_r1	GLM	QTN-sf0406405023	G/T	4	6405023	2.9705e-07
Grain_env1_r1	GLM	QTN-sf0406406086	A/G	4	6406086	3.0929e-07
Grain_env1_r1	GLM	QTN-sf0406406125	T/C	4	6406125	5.0131e-08
Grain_env1_r1	GLM	QTN-sf0406406797	G/A	4	6406797	9.6164e-08
Grain_env1_r1	GLM	QTN-sf0406407135	A/T	4	6407135	1.3593e-07
Grain_env1_r1	GLM	QTN-sf0406408484	T/C	4	6408484	2.4499e-07
Grain_env1_r1	GLM	QTN-sf0406408778	C/T	4	6408778	1.6111e-07
Grain_env1_r1	GLM	QTN-sf0406408971	A/G	4	6408971	1.207e-07
Grain_env1_r1	GLM	QTN-sf0406408990	T/C	4	6408990	4.7443e-08
Grain_env1_r1	GLM	QTN-sf0406409120	G/A	4	6409120	1.6334e-07
Grain_env1_r1	GLM	QTN-sf0406409190	A/G	4	6409190	2.6418e-07
Grain_env1_r1	GLM	QTN-sf0406409191	C/A	4	6409191	2.6418e-07
Grain_env1_r1	GLM	QTN-sf0406409406	A/G	4	6409406	2.1954e-07
Grain_env1_r1	GLM	QTN-sf0406409427	T/G	4	6409427	2.1938e-07
Grain_env1_r1	GLM	QTN-sf0406409449	A/G	4	6409449	2.1938e-07
Grain_env1_r1	GLM	QTN-sf0406409783	A/C	4	6409783	5.2437e-08
Grain_env1_r1	GLM	QTN-sf0406410233	T/C	4	6410233	3.0895e-07
Grain_env1_r1	GLM	QTN-sf0406410310	A/G	4	6410310	2.0677e-07
Grain_env1_r1	GLM	QTN-sf0406410538	C/T	4	6410538	5.918e-08
Grain_env1_r1	GLM	QTN-sf0406410621	T/C	4	6410621	1.9424e-07
Grain_env1_r1	GLM	QTN-sf0406410959	G/A	4	6410959	2.6778e-07
Grain_env1_r1	GLM	QTN-sf0406411267	T/C	4	6411267	2.6295e-07
Grain_env1_r1	GLM	QTN-sf0406411393	C/T	4	6411393	2.6335e-07
Grain_env1_r1	GLM	QTN-sf0406411403	C/G	4	6411403	1.5881e-07
Grain_env1_r1	GLM	QTN-sf0406411672	T/C	4	6411672	9.6592e-08
Grain_env1_r1	GLM	QTN-sf0406412610	T/C	4	6412610	2.7215e-07
Grain_env1_r1	GLM	QTN-sf0406412665	A/G	4	6412665	7.1366e-08
Grain_env1_r1	GLM	QTN-sf0406412982	T/C	4	6412982	2.6698e-07
Grain_env1_r1	GLM	QTN-sf0406413232	T/A	4	6413232	9.9545e-08
Grain_env1_r1	GLM	QTN-sf0406413352	T/G	4	6413352	1.7489e-07
Grain_env1_r1	GLM	QTN-sf0406413443	T/C	4	6413443	1.7813e-08
Grain_env1_r1	GLM	QTN-sf0406414148	G/A	4	6414148	6.7187e-08
Grain_env1_r1	GLM	QTN-sf0406414748	G/A	4	6414748	1.8646e-07
Grain_env1_r1	GLM	QTN-sf0406415709	C/T	4	6415709	1.7449e-07
Grain_env1_r1	GLM	QTN-sf0406416209	A/G	4	6416209	2.882e-07
Grain_env1_r1	GLM	QTN-sf0406416328	A/G	4	6416328	2.3596e-07
Grain_env1_r1	GLM	QTN-sf0406417097	A/G	4	6417097	3.0278e-07
Grain_env1_r1	GLM	QTN-sf0406418106	A/G	4	6418106	7.3764e-08
Grain_env1_r1	GLM	QTN-sf0406418569	T/C	4	6418569	3.187e-07
Grain_env1_r1	GLM	QTN-sf0406418665	A/G	4	6418665	1.2583e-07
Grain_env1_r1	GLM	QTN-sf0406418919	A/G	4	6418919	6.8145e-08
Grain_env1_r1	GLM	QTN-sf0406419424	T/G	4	6419424	3.1367e-07
Grain_env1_r1	GLM	QTN-sf0406419726	T/C	4	6419726	1.3412e-07
Grain_env1_r1	GLM	QTN-sf0406419996	A/G	4	6419996	1.0398e-07
Grain_env1_r1	GLM	QTN-sf0406420376	T/A	4	6420376	1.932e-07
Grain_env1_r1	GLM	QTN-sf0406421512	T/C	4	6421512	6.1668e-08
Grain_env1_r1	GLM	QTN-sf0406422208	T/C	4	6422208	2.4174e-07
Grain_env1_r1	GLM	QTN-sf0406422454	A/G	4	6422454	2.3633e-07
Grain_env1_r1	GLM	QTN-sf0406423088	C/T	4	6423088	1.8082e-07
Grain_env1_r1	GLM	QTN-sf0406423440	C/G	4	6423440	2.2952e-07
Grain_env1_r1	GLM	QTN-sf0406424345	A/G	4	6424345	2.587e-07
Grain_env1_r1	GLM	QTN-sf0406424536	C/A	4	6424536	1.0897e-07
Grain_env1_r1	GLM	QTN-sf0406424803	A/C	4	6424803	8.7515e-08
Grain_env1_r1	GLM	QTN-sf0406424987	A/C	4	6424987	8.2817e-08
Grain_env1_r1	GLM	QTN-sf0406427774	A/G	4	6427774	2.6427e-07
Grain_env1_r1	GLM	QTN-sf0406430853	T/C	4	6430853	1.2137e-07
Grain_env1_r1	GLM	QTN-sf0406431608	A/G	4	6431608	3.0489e-07
Grain_env1_r1	GLM	QTN-sf0406431720	T/C	4	6431720	6.8145e-08
Grain_env1_r1	GLM	QTN-sf0406433323	T/C	4	6433323	1.7653e-07
Grain_env1_r1	GLM	QTN-sf0406433725	G/A	4	6433725	9.9545e-08
Grain_env1_r1	GLM	QTN-sf0406434079	T/C	4	6434079	3.0123e-07
Grain_env1_r1	GLM	QTN-sf0406434155	T/C	4	6434155	1.8415e-07
Grain_env1_r1	GLM	QTN-sf0406435229	A/C	4	6435229	1.1736e-07
Grain_env1_r1	GLM	QTN-sf0406435289	A/G	4	6435289	1.1736e-07
Grain_env1_r1	GLM	QTN-sf0406435743	A/G	4	6435743	1.3712e-07
Grain_env1_r1	GLM	QTN-sf0406435885	A/G	4	6435885	1.7181e-07
Grain_env1_r1	GLM	QTN-sf0406435931	A/G	4	6435931	1.7181e-07
Grain_env1_r1	GLM	QTN-sf0406436370	A/C	4	6436370	2.4732e-07
Grain_env1_r1	GLM	QTN-sf0406436922	T/G	4	6436922	1.6772e-07
Grain_env1_r1	GLM	QTN-sf0406437002	T/C	4	6437002	5.86e-09
Grain_env1_r1	GLM	QTN-sf0406437066	A/C	4	6437066	1.658e-07
Grain_env1_r1	GLM	QTN-sf0406437265	A/G	4	6437265	2.3308e-07
Grain_env1_r1	GLM	QTN-sf0406437269	A/G	4	6437269	1.5057e-07
Grain_env1_r1	GLM	QTN-sf0406444079	T/A	4	6444079	1.636e-07
Grain_env1_r1	GLM	QTN-sf0406444340	A/G	4	6444340	1.9594e-07
Grain_env1_r1	GLM	QTN-sf0406445153	A/T	4	6445153	6.6307e-08
Grain_env1_r1	GLM	QTN-sf0406445161	A/G	4	6445161	6.6307e-08
Grain_env1_r1	GLM	QTN-sf0406445361	T/C	4	6445361	3.9701e-08
Grain_env1_r1	GLM	QTN-sf0406445555	C/T	4	6445555	1.251e-07
Grain_env1_r1	GLM	QTN-sf0406445638	T/C	4	6445638	2.0093e-07
Grain_env1_r1	GLM	QTN-sf0406445715	T/C	4	6445715	6.9309e-08
Grain_env1_r1	GLM	QTN-sf0406445727	T/A	4	6445727	6.9309e-08
Grain_env1_r1	GLM	QTN-sf0406445840	C/T	4	6445840	8.6864e-08
Grain_env1_r1	GLM	QTN-sf0406445858	A/G	4	6445858	1.0657e-07
Grain_env1_r1	GLM	QTN-sf0406446404	A/G	4	6446404	1.2634e-07
Grain_env1_r1	GLM	QTN-sf0406452183	A/G	4	6452183	1.1971e-07
Grain_env1_r1	GLM	QTN-sf0406455549	A/G	4	6455549	1.1978e-07
Grain_env1_r1	GLM	QTN-sf0406455792	A/G	4	6455792	1.2543e-07
Grain_env1_r1	GLM	QTN-sf0406456461	G/A	4	6456461	6.3815e-08
Grain_env1_r1	GLM	QTN-sf0406457194	G/A	4	6457194	8.4955e-08
Grain_env1_r1	GLM	QTN-sf0406458220	T/C	4	6458220	6.4901e-08
Grain_env1_r1	GLM	QTN-sf0406458249	A/C	4	6458249	5.7976e-08
Grain_env1_r1	GLM	QTN-sf0406459215	T/C	4	6459215	3.4977e-08
Grain_env1_r1	GLM	QTN-sf0406460519	A/T	4	6460519	2.2466e-07
Grain_env1_r1	GLM	QTN-sf0406461021	C/T	4	6461021	5.2926e-08
Grain_env1_r1	GLM	QTN-sf0406461458	A/G	4	6461458	1.7348e-07
Grain_env1_r1	GLM	QTN-sf0406462319	T/C	4	6462319	8.3024e-08
Grain_env1_r1	GLM	QTN-sf0406466967	T/A	4	6466967	3.4258e-08
Grain_env1_r1	GLM	QTN-sf0406468138	T/C	4	6468138	3.7701e-08
Grain_env1_r1	GLM	QTN-sf0406469290	T/A	4	6469290	2.3042e-07
Grain_env1_r1	GLM	QTN-sf0406469355	A/G	4	6469355	9.5288e-08
Grain_env1_r1	GLM	QTN-sf0406470088	T/A	4	6470088	1.1053e-07
Grain_env1_r1	GLM	QTN-sf0406470286	C/T	4	6470286	1.952e-07
Grain_env1_r1	GLM	QTN-sf0406470462	A/G	4	6470462	1.0462e-07
Grain_env1_r1	GLM	QTN-sf0406470827	T/C	4	6470827	4.4323e-08
Grain_env1_r1	GLM	QTN-sf0406471696	A/G	4	6471696	3.1879e-07
Grain_env1_r1	GLM	QTN-sf0406473129	T/C	4	6473129	1.2503e-07
Grain_env1_r1	GLM	QTN-sf0406474887	A/G	4	6474887	8.3815e-08
Grain_env1_r1	GLM	QTN-sf0406474905	A/C	4	6474905	2.1088e-07
Grain_env1_r1	GLM	QTN-sf0406478020	A/G	4	6478020	2.0106e-07
Grain_env1_r1	GLM	QTN-sf0406478992	A/C	4	6478992	2.0952e-07
Grain_env1_r1	GLM	QTN-sf0406479055	T/C	4	6479055	8.2e-08
Grain_env1_r1	GLM	QTN-sf0406483730	C/A	4	6483730	1.1451e-07
Grain_env1_r1	GLM	QTN-sf0406483894	T/C	4	6483894	2.0646e-07
Grain_env1_r1	GLM	QTN-sf0406484220	A/T	4	6484220	1.7134e-07
Grain_env1_r1	GLM	QTN-sf0406484979	A/G	4	6484979	1.7767e-08
Grain_env1_r1	GLM	QTN-sf0406488086	A/G	4	6488086	9.3836e-08
Grain_env1_r1	GLM	QTN-sf0406489371	C/T	4	6489371	3.7436e-08
Grain_env1_r1	GLM	QTN-sf0406489788	A/G	4	6489788	1.985e-07
Grain_env1_r1	GLM	QTN-sf0406491417	A/G	4	6491417	8.6412e-08
Grain_env1_r1	GLM	QTN-sf0406491748	A/G	4	6491748	8.6412e-08
Grain_env1_r1	GLM	QTN-sf0406491798	T/C	4	6491798	8.6412e-08
Grain_env1_r1	GLM	QTN-sf0406492232	A/G	4	6492232	2.7491e-07
Grain_env1_r1	GLM	QTN-sf0406492595	C/T	4	6492595	3.1938e-07
Grain_env1_r1	GLM	QTN-sf0406492618	A/G	4	6492618	4.9125e-08
Grain_env1_r1	GLM	QTN-sf0406494585	T/C	4	6494585	2.7e-07
Grain_env1_r1	GLM	QTN-sf0406495446	A/G	4	6495446	1.2064e-07
Grain_env1_r1	GLM	QTN-sf0406495776	T/G	4	6495776	2.0076e-07
Grain_env1_r1	GLM	QTN-sf0406496906	G/A	4	6496906	1.5163e-07
Grain_env1_r1	GLM	QTN-sf0406498429	T/C	4	6498429	1.3917e-07
Grain_env1_r1	GLM	QTN-sf0406498678	A/G	4	6498678	2.7707e-07
Grain_env1_r1	GLM	QTN-sf0406498882	T/A	4	6498882	2.9664e-07
Grain_env1_r1	GLM	QTN-sf0406499213	A/G	4	6499213	1.7039e-08
Grain_env1_r1	GLM	QTN-sf0406500731	T/C	4	6500731	3.2457e-08
Grain_env1_r1	GLM	QTN-sf0406500787	A/G	4	6500787	9.2971e-08
Grain_env1_r1	GLM	QTN-sf0406501069	A/G	4	6501069	2.0756e-07
Grain_env1_r1	GLM	QTN-sf0406501607	A/G	4	6501607	1.4406e-07
Grain_env1_r1	GLM	QTN-sf0406501683	T/C	4	6501683	1.4688e-07
Grain_env1_r1	GLM	QTN-sf0406501838	A/G	4	6501838	2.9344e-07
Grain_env1_r1	GLM	QTN-sf0406503010	G/T	4	6503010	1.0255e-07
Grain_env1_r1	GLM	QTN-sf0406503228	A/G	4	6503228	2.1661e-07
Grain_env1_r1	GLM	QTN-sf0406504226	C/T	4	6504226	2.0677e-07
Grain_env1_r1	GLM	QTN-sf0406505083	C/A	4	6505083	1.9546e-07
Grain_env1_r1	GLM	QTN-sf0406505891	T/C	4	6505891	9.0125e-08
Grain_env1_r1	GLM	QTN-sf0406508483	T/C	4	6508483	2.1424e-07
Grain_env1_r1	GLM	QTN-sf0406508803	A/T	4	6508803	2.5982e-07
Grain_env1_r1	GLM	QTN-sf0406509406	T/C	4	6509406	1.5599e-08
Grain_env1_r1	GLM	QTN-sf0406509478	C/T	4	6509478	2.2359e-07
Grain_env1_r1	GLM	QTN-sf0406509549	A/T	4	6509549	2.401e-07
Grain_env1_r1	GLM	QTN-sf0406520048	A/G	4	6520048	6.9535e-09
Grain_env1_r1	GLM	QTN-sf0406521563	T/A	4	6521563	2.5425e-07
Grain_env1_r1	GLM	QTN-sf0406522012	A/G	4	6522012	7.1881e-08
Grain_env1_r1	GLM	QTN-sf0406522175	G/C	4	6522175	1.0236e-07
Grain_env1_r1	GLM	QTN-sf0406522203	T/A	4	6522203	2.655e-08
Grain_env1_r1	GLM	QTN-sf0406523239	T/C	4	6523239	1.1348e-07
Grain_env1_r1	GLM	QTN-sf0406523747	A/G	4	6523747	7.118e-08
Grain_env1_r1	GLM	QTN-sf0406523853	T/C	4	6523853	2.4789e-07
Grain_env1_r1	GLM	QTN-sf0406527157	T/C	4	6527157	1.3969e-07
Grain_env1_r1	GLM	QTN-sf0406527417	T/C	4	6527417	1.6431e-07
Grain_env1_r1	GLM	QTN-sf0406528270	A/C	4	6528270	2.9273e-07
Grain_env1_r1	GLM	QTN-sf0406528481	A/G	4	6528481	7.3764e-08
Grain_env1_r1	GLM	QTN-sf0406528845	T/A	4	6528845	3.0514e-07
Grain_env1_r1	GLM	QTN-sf0406529636	T/C	4	6529636	8.3849e-08
Grain_env1_r1	GLM	QTN-sf0406529833	A/G	4	6529833	2.4853e-07
Grain_env1_r1	GLM	QTN-sf0406530686	T/C	4	6530686	1.1646e-07
Grain_env1_r1	GLM	QTN-sf0406532978	A/G	4	6532978	2.6333e-07
Grain_env1_r1	GLM	QTN-sf0406533196	A/G	4	6533196	1.4136e-07
Grain_env1_r1	GLM	QTN-sf0406533507	T/C	4	6533507	1.8345e-07
Grain_env1_r1	GLM	QTN-sf0406533583	A/C	4	6533583	6.0126e-08
Grain_env1_r1	GLM	QTN-sf0406533886	G/A	4	6533886	3.0626e-07
Grain_env1_r1	GLM	QTN-sf0406534233	T/C	4	6534233	1.0398e-08
Grain_env1_r1	GLM	QTN-sf0406534913	T/C	4	6534913	6.5258e-08
Grain_env1_r1	GLM	QTN-sf0406534959	T/G	4	6534959	1.0759e-07
Grain_env1_r1	GLM	QTN-sf0406535420	G/A	4	6535420	1.0782e-07
Grain_env1_r1	GLM	QTN-sf0406535431	A/C	4	6535431	1.0782e-07
Grain_env1_r1	GLM	QTN-sf0406535646	A/G	4	6535646	1.6606e-07
Grain_env1_r1	GLM	QTN-sf0406536336	T/C	4	6536336	9.1533e-08
Grain_env1_r1	GLM	QTN-sf0406536437	T/C	4	6536437	2.7238e-07
Grain_env1_r1	GLM	QTN-sf0406536761	T/C	4	6536761	1.9565e-07
Grain_env1_r1	GLM	QTN-sf0406536974	C/A	4	6536974	2.6071e-07
Grain_env1_r1	GLM	QTN-sf0406537000	T/C	4	6537000	2.5025e-07
Grain_env1_r1	GLM	QTN-sf0406537529	T/C	4	6537529	1.6013e-07
Grain_env1_r1	GLM	QTN-sf0406537581	A/G	4	6537581	1.4795e-08
Grain_env1_r1	GLM	QTN-sf0406537913	G/A	4	6537913	2.7789e-07
Grain_env1_r1	GLM	QTN-sf0406538412	T/C	4	6538412	9.3673e-10
Grain_env1_r1	GLM	QTN-sf0406538884	T/A	4	6538884	4.6163e-09
Grain_env1_r1	GLM	QTN-sf0406539407	A/G	4	6539407	1.927e-07
Grain_env1_r1	GLM	QTN-sf0406539471	A/G	4	6539471	1.2639e-08
Grain_env1_r1	GLM	QTN-sf0406539617	A/G	4	6539617	1.2408e-07
Grain_env1_r1	GLM	QTN-sf0406539896	G/A	4	6539896	1.4139e-07
Grain_env1_r1	GLM	QTN-sf0406540282	A/G	4	6540282	3.1845e-07
Grain_env1_r1	GLM	QTN-sf0406540676	T/G	4	6540676	1.2555e-07
Grain_env1_r1	GLM	QTN-sf0406540677	T/A	4	6540677	1.2555e-07
Grain_env1_r1	GLM	QTN-sf0406540872	A/G	4	6540872	2.5548e-07
Grain_env1_r1	GLM	QTN-sf0406541515	A/G	4	6541515	1.6772e-07
Grain_env1_r1	GLM	QTN-sf0406552659	C/T	4	6552659	2.7205e-08
Grain_env1_r1	GLM	QTN-sf0406553114	G/A	4	6553114	1.3222e-07
Grain_env1_r1	GLM	QTN-sf0406553737	A/C	4	6553737	2.9595e-07
Grain_env1_r1	GLM	QTN-sf0406553877	A/G	4	6553877	1.6927e-07
Grain_env1_r1	GLM	QTN-sf0406554359	A/G	4	6554359	7.795e-08
Grain_env1_r1	GLM	QTN-sf0406558145	A/G	4	6558145	2.2564e-07
Grain_env1_r1	GLM	QTN-sf0406558786	A/G	4	6558786	2.3251e-08
Grain_env1_r1	GLM	QTN-sf0406562609	A/G	4	6562609	1.7522e-07
Grain_env1_r1	GLM	QTN-sf0406562617	T/C	4	6562617	1.4019e-07
Grain_env1_r1	GLM	QTN-sf0406562703	A/C	4	6562703	2.5119e-07
Grain_env1_r1	GLM	QTN-sf0406564288	A/C	4	6564288	9.9322e-08
Grain_env1_r1	GLM	QTN-sf0406567969	A/G	4	6567969	1.7801e-07
Grain_env1_r1	GLM	QTN-sf0406571092	C/T	4	6571092	2.9652e-07
Grain_env1_r1	GLM	QTN-sf0406571331	C/G	4	6571331	2.9332e-07
Grain_env1_r1	GLM	QTN-sf0406571377	T/C	4	6571377	2.7959e-07
Grain_env1_r1	GLM	QTN-sf0406571925	C/G	4	6571925	5.7553e-08
Grain_env1_r1	GLM	QTN-sf0406572482	G/A	4	6572482	9.599e-08
Grain_env1_r1	GLM	QTN-sf0406572724	G/A	4	6572724	1.2815e-07
Grain_env1_r1	GLM	QTN-sf0406573361	T/C	4	6573361	1.6513e-07
Grain_env1_r1	GLM	QTN-sf0406573840	T/C	4	6573840	2.4883e-07
Grain_env1_r1	GLM	QTN-sf0406574616	A/G	4	6574616	2.9403e-07
Grain_env1_r1	GLM	QTN-sf0406575508	C/T	4	6575508	1.1021e-07
Grain_env1_r1	GLM	QTN-sf0406576717	A/G	4	6576717	4.3937e-08
Grain_env1_r1	GLM	QTN-sf0406577916	T/C	4	6577916	2.7754e-07
Grain_env1_r1	GLM	QTN-sf0406579352	A/G	4	6579352	1.2118e-07
Grain_env1_r1	GLM	QTN-sf0406587751	T/G	4	6587751	1.188e-07
Grain_env1_r1	GLM	QTN-sf0406587828	T/C	4	6587828	7.355e-08
Grain_env1_r1	GLM	QTN-sf0406587937	A/C	4	6587937	8.6081e-08
Grain_env1_r1	GLM	QTN-sf0406587950	G/T	4	6587950	8.6081e-08
Grain_env1_r1	GLM	QTN-sf0406592277	T/C	4	6592277	1.4028e-07
Grain_env1_r1	GLM	QTN-sf0406595525	T/C	4	6595525	3.0147e-07
Grain_env1_r1	GLM	QTN-sf0406595609	A/G	4	6595609	1.9951e-07
Grain_env1_r1	GLM	QTN-sf0406595896	C/A	4	6595896	1.3061e-07
Grain_env1_r1	GLM	QTN-sf0406595902	C/A	4	6595902	1.3061e-07
Grain_env1_r1	GLM	QTN-sf0406608604	C/G	4	6608604	1.5956e-07
Grain_env1_r1	GLM	QTN-sf0406611161	G/C	4	6611161	1.6328e-07
Grain_env1_r1	GLM	QTN-sf0406611450	T/G	4	6611450	2.9647e-07
Grain_env1_r1	GLM	QTN-sf0406611709	C/G	4	6611709	3.0431e-07
Grain_env1_r1	GLM	QTN-sf0406614215	T/C	4	6614215	1.9125e-07
Grain_env1_r1	GLM	QTN-sf0406614706	A/G	4	6614706	2.0201e-07
Grain_env1_r1	GLM	QTN-sf0406616433	A/G	4	6616433	2.9548e-07
Grain_env1_r1	GLM	QTN-sf0406621034	A/G	4	6621034	3.101e-07
Grain_env1_r1	GLM	QTN-sf0406630944	A/G	4	6630944	1.3261e-07
Grain_env1_r1	GLM	QTN-sf0406639253	T/A	4	6639253	3.2144e-07
Grain_env1_r1	GLM	QTN-sf0406640633	T/C	4	6640633	2.9029e-07
Grain_env1_r1	GLM	QTN-sf0406640961	T/C	4	6640961	3.0776e-07
Grain_env1_r1	GLM	QTN-sf0406640979	T/C	4	6640979	2.1501e-07
Grain_env1_r1	GLM	QTN-sf0406641570	C/T	4	6641570	1.0579e-07
Grain_env1_r1	GLM	QTN-sf0406641691	T/C	4	6641691	2.695e-07
Grain_env1_r1	GLM	QTN-sf0406641722	T/C	4	6641722	2.6697e-07
Grain_env1_r1	GLM	QTN-sf0406644056	T/C	4	6644056	2.8855e-08
Grain_env1_r1	GLM	QTN-sf0406645308	T/C	4	6645308	2.9999e-07
Grain_env1_r1	GLM	QTN-sf0406645309	A/T	4	6645309	2.9999e-07
Grain_env1_r1	GLM	QTN-sf0406648104	G/A	4	6648104	7.4397e-08
Grain_env1_r1	GLM	QTN-sf0406649376	G/A	4	6649376	3.7917e-08
Grain_env1_r1	GLM	QTN-sf0406649619	G/A	4	6649619	3.7917e-08
Grain_env1_r1	GLM	QTN-sf0406649752	A/G	4	6649752	2.0457e-07
Grain_env1_r1	GLM	QTN-sf0406649995	C/T	4	6649995	3.146e-07
Grain_env1_r1	GLM	QTN-sf0406655128	G/A	4	6655128	1.4762e-07
Grain_env1_r1	GLM	QTN-sf0406655129	T/G	4	6655129	1.4762e-07
Grain_env1_r1	GLM	QTN-sf0407166467	A/G	4	7166467	1.0609e-07
Grain_env1_r1	GLM	QTN-sf0407166475	A/C	4	7166475	1.0609e-07
Grain_env1_r1	GLM	QTN-sf0407166696	A/G	4	7166696	1.4927e-07
Grain_env1_r1	GLM	QTN-sf0407166706	T/C	4	7166706	1.4927e-07
Grain_env1_r1	GLM	QTN-sf0407166760	A/G	4	7166760	1.6601e-07
Grain_env1_r1	GLM	QTN-sf0407166813	C/T	4	7166813	1.2268e-07
Grain_env1_r1	GLM	QTN-sf0407166909	T/C	4	7166909	1.9313e-07
Grain_env1_r1	GLM	QTN-sf0407166910	G/T	4	7166910	1.9313e-07
Grain_env1_r1	GLM	QTN-sf0407166936	C/A	4	7166936	1.7201e-07
Grain_env1_r1	GLM	QTN-sf0407166995	C/A	4	7166995	2.0081e-07
Grain_env1_r1	GLM	QTN-sf0407167012	A/T	4	7167012	1.1338e-07
Grain_env1_r1	GLM	QTN-sf0407167036	T/C	4	7167036	6.745e-08
Grain_env1_r1	GLM	QTN-sf0407167237	A/G	4	7167237	2.534e-07
Grain_env1_r1	GLM	QTN-sf0407167246	T/C	4	7167246	1.8031e-07
Grain_env1_r1	GLM	QTN-sf0407167363	T/C	4	7167363	5.214e-08
Grain_env1_r1	GLM	QTN-sf0407167369	G/A	4	7167369	5.214e-08
Grain_env1_r1	GLM	QTN-sf0407167384	T/C	4	7167384	4.1663e-08
Grain_env1_r1	GLM	QTN-sf0407167402	A/G	4	7167402	7.9673e-08
Grain_env1_r1	GLM	QTN-sf0407167408	T/C	4	7167408	7.9673e-08
Grain_env1_r1	GLM	QTN-sf0407167462	A/G	4	7167462	3.0016e-07
Grain_env1_r1	GLM	QTN-sf0407167502	A/G	4	7167502	1.4205e-07
Grain_env1_r1	GLM	QTN-sf0407167504	C/T	4	7167504	1.2972e-07
Grain_env1_r1	GLM	QTN-sf0407167522	T/A	4	7167522	2.4784e-07
Grain_env1_r1	GLM	QTN-sf0407167545	G/A	4	7167545	2.2089e-07
Grain_env1_r1	GLM	QTN-sf0407167552	T/C	4	7167552	2.2089e-07
Grain_env1_r1	GLM	QTN-sf0407167578	C/T	4	7167578	2.7538e-07
Grain_env1_r1	GLM	QTN-sf0407167596	A/G	4	7167596	1.4486e-07
Grain_env1_r1	GLM	QTN-sf0407167597	C/T	4	7167597	1.4486e-07
Grain_env1_r1	GLM	QTN-sf0407167770	G/A	4	7167770	1.2872e-07
Grain_env1_r1	GLM	QTN-sf0407167773	C/T	4	7167773	1.2872e-07
Grain_env1_r1	GLM	QTN-sf0407167776	G/A	4	7167776	1.2872e-07
Grain_env1_r1	GLM	QTN-sf0407167863	C/T	4	7167863	2.665e-07
Grain_env1_r1	GLM	QTN-sf0407167870	T/C	4	7167870	2.5644e-07
Grain_env1_r1	GLM	QTN-sf0407167871	G/A	4	7167871	2.3753e-07
Grain_env1_r1	GLM	QTN-sf0407167908	T/C	4	7167908	2.1484e-07
Grain_env1_r1	GLM	QTN-sf0407167911	G/A	4	7167911	2.1484e-07
Grain_env1_r1	GLM	QTN-sf0407167956	C/T	4	7167956	1.3933e-07
Grain_env1_r1	GLM	QTN-sf0407167972	T/A	4	7167972	8.0994e-08
Grain_env1_r1	GLM	QTN-sf0407212724	T/C	4	7212724	3.1181e-07
Grain_env1_r1	GLM	QTN-sf0407219393	A/G	4	7219393	1.8966e-07
Grain_env1_r1	GLM	QTN-sf0407338836	G/A	4	7338836	2.0326e-07
Grain_env1_r1	GLM	QTN-sf0407368466	G/A	4	7368466	5.4936e-08
Grain_env1_r1	GLM	QTN-sf0407391003	A/G	4	7391003	2.9275e-07
Grain_env1_r1	GLM	QTN-sf0407397194	A/C	4	7397194	2.3895e-07
Grain_env1_r1	GLM	QTN-sf0407483456	A/G	4	7483456	1.0192e-08
Grain_env1_r1	GLM	QTN-sf0407528488	G/A	4	7528488	1.6961e-07
Grain_env1_r1	GLM	QTN-sf0407892084	G/A	4	7892084	1.5329e-07
Grain_env1_r1	GLM	QTN-sf0408474590	G/A	4	8474590	5.0466e-08
Grain_env1_r1	GLM	QTN-sf0409919874	A/G	4	9919874	1.0161e-07
Grain_env1_r1	GLM	QTN-sf0410667813	T/C	4	10667813	1.1191e-07
Grain_env1_r1	GLM	QTN-sf0410667824	T/A	4	10667824	1.1191e-07
Grain_env1_r1	GLM	QTN-sf0410853875	G/A	4	10853875	2.9732e-07
[truncated: 131,957 more rows]

## Sheet: Supplementary Table S2
Supplementary Table S2 | Common QTNs identified from grain/leaf lysine content datasets in rice.
Dataset	Model	QTN	SNP	Chromosome	Position	R2 (%)	No. Methods(1-10)	GLM-P-value	EMMAX-P-value	MLM-P-value	CMLM-P-value	FASTmrEMMA		FASTmrMLM		ISIS EM-BLASSO		mrMLM		pKWmEB		pLARmEB
												P-value	LOD score	P-value	LOD score	P-value	LOD score	P-value	LOD score	P-value	LOD score	P-value	LOD score
Grain_env1_r1	MLM-SL | mrMLM-ML	QTN-sf0825259651	A/G	8	25259651	0.8259	3		5.1869e-06							6.54034e-05	3.4613			0.000169356	3.0714
Grain_env1_r1	GLM | mrMLM-ML	QTN-sf0805106359	G/A	8	5106359	4.4542	5	1.9867e-07				6.76083e-14	12.1904					5.60402e-09	7.3762	2.97577e-06	4.741	3.42531e-12	10.5165
Grain_env1_r1	GLM | mrMLM-ML	QTN-sf0405929388	T/C	4	5929388	5.3918	2	3.7758e-08										5.82908e-08	6.3886
Grain_env1_r1	GLM | MLM-SL | mrMLM-ML	QTN-sf0424236462	T/G	4	24236462	7.3084	5	3.6625e-11	6.422e-06			1.46622e-11	9.8977					0.000106439	3.2614			7.12689e-11	9.2256
Grain_env1_r1	GLM | mrMLM-ML	QTN-sf1012964749	T/G	10	12964749	7.6283	3	2.3311e-09						4.89103e-08	6.4624					6.89763e-05	3.4395
Grain_env1_r1	MLM-SL | mrMLM-ML	QTN-sf0519276131	T/G	5	19276131	7.6473	4		6.4298e-06					0.000113606	3.2347					6.94065e-05	3.4369	3.19669e-07	5.6736
Grain_env1_r1	GLM | mrMLM-ML	QTN-sf1002818624	A/G	10	2818624	7.9007	2	2.7246e-07												9.2918e-07	5.2268
Grain_env1_r1	MLM-SL | mrMLM-ML	QTN-sf0624558451	T/C	6	24558451	11.9141	3		4.9352e-06									9.79941e-11	9.0904			0.000182306	3.0413
Grain_env1_r1	GLM | mrMLM-ML	QTN-sf0316353176	A/G	3	16353176	12.5631	2	1.0825e-09												1.9169e-05	3.9675
Grain_env1_r1	GLM | mrMLM-ML	QTN-sf1122479800	T/C	11	22479800	14.2062	2	1.8682e-09						6.19869e-10	8.3079
Grain_env1_r1	GLM | MLM-SL | mrMLM-ML	QTN-sf0102259021	G/A	1	2259021	14.4897	5	2.2743e-07	2.7812e-07	8.2391e-07	2.8418e-07											2.71019e-09	7.6833
Grain_env1_r1	GLM | mrMLM-ML	QTN-sf1013407412	T/C	10	13407412	14.6089	2	1.1853e-08												1.50383e-08	6.9595
Grain_env1_r1	GLM | MLM-SL	QTN-sf0102352673	A/T	1	2352673	14.669	3	2.4105e-07	3.7458e-06		1.9607e-06
Grain_env1_r1	GLM | MLM-SL	QTN-sf0102342460	G/C	1	2342460	14.8091	2	3.1434e-07	5.9146e-06
Grain_env1_r1	GLM | mrMLM-ML	QTN-sf0406235884	T/C	4	6235884	15.2095	2	2.029e-08								4.74024e-06	4.5471
Grain_env1_r1	GLM | mrMLM-ML	QTN-sf0717867262	T/A	7	17867262	15.3304	2	1.302e-08						0.000189627	3.0252
Grain_env1_r1	MLM-SL | mrMLM-ML	QTN-sf0102290936	G/C	1	2290936	15.5366	4		9.1215e-07		3.4053e-06			6.77174e-07	5.3592					1.8737e-05	3.9769
Grain_env1_r1	GLM | MLM-SL	QTN-sf0301665243	G/A	3	1665243	15.858	3	3.549e-09	3.1185e-07	1.017e-06
Grain_env1_r1	GLM | MLM-SL	QTN-sf0102331453	C/T	1	2331453	16.0125	3	1.4401e-07	1.6972e-06		2.0827e-06
Grain_env1_r1	GLM | mrMLM-ML	QTN-sf0910475347	G/C	9	10475347	16.6467	2	3.9397e-09								2.95869e-08	6.6741
Grain_env1_r1	GLM | mrMLM-ML	QTN-sf1013358165	A/C	10	13358165	16.7534	2	8.6081e-09								7.96526e-07	5.2913
Grain_env1_r1	GLM | MLM-SL	QTN-sf0302400247	T/C	3	2400247	17.5053	2	1.5025e-08	2.5133e-06
Grain_env1_r1	GLM | MLM-SL | mrMLM-ML	QTN-sf0302508135	T/A	3	2508135	20.2547	6	2.4494e-10	7.7695e-07					8.00571e-08	6.2551	1.44777e-05	4.0836	2.85365e-11	9.6145	3.24713e-08	6.6349
Grain_env1_r2	GLM | MLM-SL	QTN-sf0903429333	A/G	9	3429333	0.0031	2	6.8926e-10			4.352e-06
Grain_env1_r2	GLM | mrMLM-ML	QTN-sf0208464791	G/A	2	8464791	0.1184	2	1.3053e-09														3.56944e-07	5.6274
Grain_env1_r2	GLM | mrMLM-ML	QTN-sf0407167908	T/C	4	7167908	0.5443	2	4.137e-10														1.27174e-07	6.0605
Grain_env1_r2	GLM | MLM-SL	QTN-sf0729647439	A/G	7	29647439	0.91	2	1.0756e-07			4.8764e-06
Grain_env1_r2	GLM | MLM-SL	QTN-sf0729650943	T/C	7	29650943	0.91	2	3.2818e-08			4.9644e-06
Grain_env1_r2	GLM | MLM-SL	QTN-sf0729669673	T/C	7	29669673	0.91	2	7.5948e-08			4.6367e-06
Grain_env1_r2	GLM | MLM-SL	QTN-sf0729647264	T/C	7	29647264	0.9135	2	4.3892e-08			3.5759e-06
Grain_env1_r2	GLM | MLM-SL	QTN-sf0729406364	C/T	7	29406364	1.0929	3	1.4616e-08		5.8874e-06	3.8223e-06
Grain_env1_r2	GLM | mrMLM-ML	QTN-sf0419067736	T/C	4	19067736	1.1299	3	1.5518e-09								2.47856e-07	5.7804					9.47327e-06	4.2595
Grain_env1_r2	GLM | mrMLM-ML	QTN-sf0607725091	T/A	6	7725091	1.3632	2	4.4181e-10												2.07444e-05	3.9348
Grain_env1_r2	GLM | MLM-SL	QTN-sf0729647216	T/C	7	29647216	1.4502	3	4.7148e-08	4.7139e-06		3.7525e-06
Grain_env1_r2	GLM | mrMLM-ML	QTN-sf1219347303	A/G	12	19347303	1.4907	2	6.5304e-08												1.32434e-06	5.0787
Grain_env1_r2	GLM | MLM-SL	QTN-sf0729607886	T/C	7	29607886	1.5463	4	6.0248e-09	4.0445e-06	2.6448e-06	1.2182e-06
Grain_env1_r2	GLM | mrMLM-ML	QTN-sf1122471205	T/C	11	22471205	1.98	2	7.4423e-11														1.21032e-19	17.8571
Grain_env1_r2	GLM | mrMLM-ML	QTN-sf0626549077	T/C	6	26549077	2.642	3	2.9386e-08				1.86724e-09	7.8409							8.59805e-05	3.349
Grain_env1_r2	GLM | mrMLM-ML	QTN-sf0100906859	T/C	1	906859	2.8918	5	1.1293e-07				9.6917e-20	17.9524	9.45802e-09	7.1552					1.94805e-11	9.7768	6.82025e-10	8.2674
Grain_env1_r2	GLM | mrMLM-ML	QTN-sf0906270575	G/A	9	6270575	3.2908	2	8.485e-09						4.77529e-07	5.5054
Grain_env1_r2	GLM | mrMLM-ML	QTN-sf1122382009	A/G	11	22382009	4.0382	2	2.7636e-11						7.03882e-07	5.343
Grain_env1_r2	GLM | mrMLM-ML	QTN-sf1122417941	C/A	11	22417941	5.281	2	3.0225e-09				4.21502e-14	12.3921
Grain_env1_r2	GLM | MLM-SL	QTN-sf1117076683	A/G	11	17076683	8.7622	2	2.4e-08		5.868e-06
Grain_env1_r2	MLM-SL | mrMLM-ML	QTN-sf1217502419	C/A	12	17502419	10.2303	3		5.6045e-06		2.9198e-06	4.69678e-10	8.4255
Grain_env1_r2	MLM-SL | mrMLM-ML	QTN-sf1217502417	A/G	12	17502417	10.2877	2				2.3387e-06											2.4581e-07	5.7838
Grain_env1_r2	GLM | MLM-SL | mrMLM-ML	QTN-sf1115557171	T/C	11	15557171	10.4742	4	2.3298e-08	1.1923e-06			6.03949e-07	5.407	8.10961e-07	5.2837
Grain_env1_r2	GLM | mrMLM-ML	QTN-sf1122341520	A/G	11	22341520	10.6291	2	1.2058e-09								0.000130077	3.1793
Grain_env1_r2	GLM | MLM-SL	QTN-sf0828434804	T/C	8	28434804	10.9057	2	3.1731e-07			6.293e-06
Grain_env1_r2	GLM | MLM-SL	QTN-sf0105974711	C/T	1	5974711	12.9601	2	1.0632e-08			4.3923e-06
Grain_env1_r2	MLM-SL | mrMLM-ML	QTN-sf0805364310	A/G	8	5364310	13.2024	3		3.1206e-06	5.4639e-06												1.11199e-07	6.1169
Grain_env1_r2	MLM-SL | mrMLM-ML	QTN-sf0805263637	T/C	8	5263637	13.5219	2		5.6998e-06					0.000185225	3.0348
Grain_env1_r2	GLM | mrMLM-ML	QTN-sf1115204183	G/A	11	15204183	14.0725	2	1.1695e-07										1.22039e-08	7.0476
Grain_env1_r2	GLM | mrMLM-ML	QTN-sf1013360124	T/A	10	13360124	15.3692	2	2.2408e-08				1.70765e-07	5.9368
Grain_env1_r2	GLM | MLM-SL	QTN-sf0301665162	A/G	3	1665162	17.5018	2	8.6618e-10	6.2094e-06
Grain_env1_r2	GLM | MLM-SL	QTN-sf0301672071	T/C	3	1672071	17.744	2	2.6278e-10	4.4649e-06
Grain_env1_r2	MLM-SL | mrMLM-ML	QTN-sf0621242454	G/A	6	21242454	18.2207	2		6.5007e-07													4.89103e-09	7.4337
Grain_env1_r2	GLM | MLM-SL	QTN-sf0301665599	G/A	3	1665599	18.522	2	9.5138e-11	1.985e-06
Grain_env1_r2	GLM | mrMLM-ML	QTN-sf0308698430	G/A	3	8698430	18.7307	2	8.128e-09										6.31248e-05	3.4759
Grain_env1_r2	GLM | MLM-SL	QTN-sf0301664705	T/C	3	1664705	19.0608	2	6.7087e-11	1.3848e-06
Grain_env1_r2	GLM | MLM-SL	QTN-sf0301664731	C/T	3	1664731	19.0608	2	5.8065e-11	1.3069e-06
Grain_env1_r2	GLM | MLM-SL	QTN-sf0301668636	A/G	3	1668636	19.0608	2	6.9533e-11	7.6225e-07
Grain_env1_r2	GLM | mrMLM-ML	QTN-sf1219521482	A/G	12	19521482	19.1096	2	9.6373e-10										2.93427e-08	6.6776
Grain_env1_r2	GLM | MLM-SL | mrMLM-ML	QTN-sf0301665243	G/A	3	1665243	19.3885	7	2.5508e-12	3.1185e-07	1.017e-06		5.28567e-28	26.136	1.2471e-13	11.929					3.56369e-09	7.5676	7.8759e-20	18.0415
Grain_env1_r2	GLM | mrMLM-ML	QTN-sf0906935953	A/G	9	6935953	19.8664	2	2.6335e-08														5.92925e-07	5.4148
Grain_env1_r2	GLM | mrMLM-ML	QTN-sf0825335916	C/G	8	25335916	19.9031	2	1.5992e-07				8.40814e-11	9.1554
Grain_env1_r2	GLM | mrMLM-ML	QTN-sf0717804134	A/T	7	17804134	20.2018	4	6.0851e-11				3.09314e-15	13.5084	1.07572e-05	4.2067					9.16431e-09	7.1685
Grain_env1_r2	GLM | MLM-SL	QTN-sf0301648936	T/C	3	1648936	20.9555	2	6.7238e-12	2.7887e-06
Grain_env1_r2	GLM | mrMLM-ML	QTN-sf0102342460	G/C	1	2342460	21.8226	2	8.3279e-10												6.4759e-07	5.3779
Grain_env1_r2	GLM | mrMLM-ML	QTN-sf0311302595	T/C	3	11302595	22.0581	2	2.0703e-10														4.81504e-09	7.4403
Grain_env1_r2	GLM | mrMLM-ML	QTN-sf0102873321	G/A	1	2873321	22.1034	4	7.3818e-09				6.44169e-28	26.0509	3.58426e-10	8.5401							1.19454e-07	6.0868
Grain_env1_r2	GLM | mrMLM-ML	QTN-sf0818756794	C/G	8	18756794	22.7274	2	3.1215e-08				1.46589e-06	5.0363
Grain_env1_r2	GLM | MLM-SL	QTN-sf0619215712	C/T	6	19215712	23.6127	3	2.132e-10	5.9686e-06	2.9694e-06
Grain_env1_r2	GLM | mrMLM-ML	QTN-sf1117387570	G/C	11	17387570	24.6098	2	2.5726e-10								3.63413e-06	4.6577
Grain_env1_r2	GLM | MLM-SL	QTN-sf0825353533	G/A	8	25353533	25.2801	2	1.4197e-10	3.287e-06
Grain_env1_r2	GLM | MLM-SL	QTN-sf0825352803	C/T	8	25352803	25.3577	3	2.3291e-11	3.006e-06	3.3512e-06
Grain_env1_r2	GLM | mrMLM-ML	QTN-sf0208267677	C/T	2	8267677	25.4447	2	3.0164e-10										8.97842e-07	5.2412
Grain_env1_r2	GLM | MLM-SL | mrMLM-ML	QTN-sf0825353310	C/T	8	25353310	25.7083	4	8.4791e-12	2.1913e-06	2.2177e-06						1.14604e-05	4.1805
Grain_env1_r2	GLM | mrMLM-ML	QTN-sf0208384745	T/C	2	8384745	25.8195	2	5.9581e-11								8.87769e-05	3.3358
Grain_env2_r1	GLM | MLM-SL	QTN-sf0711949886	T/C	7	11949886	0.0346	2	1.26e-08			2.0762e-06
Grain_env2_r1	GLM | MLM-SL	QTN-sf0711078466	C/T	7	11078466	0.1466	2	1.7333e-09			4.4139e-06
Grain_env2_r1	GLM | MLM-SL	QTN-sf0710970651	T/C	7	10970651	0.2159	2	2.1946e-08			5.2414e-06
Grain_env2_r1	GLM | MLM-SL	QTN-sf0703936507	G/C	7	3936507	0.3236	2	1.5501e-09			5.0351e-06
Grain_env2_r1	GLM | MLM-SL	QTN-sf0710964939	C/T	7	10964939	0.3333	2	2.6047e-08			5.2809e-06
Grain_env2_r1	GLM | MLM-SL	QTN-sf0711467819	A/G	7	11467819	0.8964	3	1.5385e-09	2.9277e-06		2.8325e-06
Grain_env2_r1	GLM | mrMLM-ML	QTN-sf0607756685	T/C	6	7756685	1.0493	2	1.9473e-09						2.57158e-18	16.5459
Grain_env2_r1	GLM | mrMLM-ML	QTN-sf1000580207	T/C	10	580207	1.3698	2	9.3557e-08														1.09219e-07	6.1245
Grain_env2_r1	GLM | mrMLM-ML	QTN-sf0508260021	T/G	5	8260021	1.8465	5	2.8321e-07				2.59298e-15	13.5838	1.739e-10	8.8469	2.6218e-05	3.838			4.97622e-11	9.3782
Grain_env2_r1	GLM | MLM-SL	QTN-sf0713048530	G/A	7	13048530	1.9948	2	1.1589e-08			4.1765e-06
Grain_env2_r1	GLM | mrMLM-ML	QTN-sf0619728311	A/T	6	19728311	2.0907	2	1.1017e-08										2.19079e-08	6.8008
Grain_env2_r1	GLM | MLM-SL	QTN-sf0713047449	G/A	7	13047449	2.405	2	4.2223e-09			2.5431e-06
Grain_env2_r1	GLM | MLM-SL	QTN-sf0713250178	G/T	7	13250178	3.0725	2	5.9526e-11			2.238e-06
Grain_env2_r1	GLM | mrMLM-ML	QTN-sf0100782507	T/A	1	782507	3.2284	2	1.938e-07												1.44911e-06	5.0411
Grain_env2_r1	MLM-SL | mrMLM-ML	QTN-sf0515179876	C/T	5	15179876	3.7812	6		4.278e-07	5.5435e-06	2.8433e-06					4.14477e-09	7.5037			3.22626e-14	12.5063	2.073e-07	5.8553
Grain_env2_r1	GLM | MLM-SL	QTN-sf0623797250	A/G	6	23797250	6.3595	3	2.4909e-07		3.4022e-06	3.6359e-06
Grain_env2_r1	MLM-SL | mrMLM-ML	QTN-sf0606188796	A/G	6	6188796	9.7651	4		2.2842e-06					1.93019e-08	6.8542					4.91021e-13	11.3443	8.41008e-07	5.2685
Grain_env2_r1	GLM | mrMLM-ML	QTN-sf0117274626	T/A	1	17274626	11.1587	2	9.3369e-09						1.69239e-09	7.8825
Grain_env2_r1	GLM | mrMLM-ML	QTN-sf0528399085	C/T	5	28399085	11.5781	3	5.1007e-08						7.76068e-22	20.0258							1.79061e-11	9.8127
Grain_env2_r1	GLM | MLM-SL | mrMLM-ML	QTN-sf1003226815	A/C	10	3226815	13.2993	4	1.7752e-07			4.2641e-06			1.6278e-05	4.0351					1.05706e-05	4.214
Grain_env2_r1	GLM | mrMLM-ML	QTN-sf0301651152	T/C	3	1651152	14.5591	2	7.8184e-08														1.06586e-05	4.2106
Grain_env2_r1	MLM-SL | mrMLM-ML	QTN-sf0820008769	T/C	8	20008769	17.0202	2		3.4298e-06													5.4513e-06	4.489
Grain_env2_r1	GLM | mrMLM-ML	QTN-sf0101545236	G/A	1	1545236	17.0587	2	3.3223e-13												4.04576e-07	5.5749
Grain_env2_r1	MLM-SL | mrMLM-ML	QTN-sf0816895590	C/T	8	16895590	17.4598	2				5.9208e-06							9.86507e-07	5.2018
Grain_env2_r1	GLM | mrMLM-ML	QTN-sf0311305090	A/G	3	11305090	18.0196	4	7.7742e-08						6.07715e-06	4.4438			9.64495e-20	17.9545			4.08413e-11	9.4621
Grain_env2_r1	GLM | MLM-SL	QTN-sf0208365832	G/A	2	8365832	19.5203	2	3.2472e-11			2.3539e-06
Grain_env2_r1	GLM | MLM-SL	QTN-sf0208358847	G/C	2	8358847	19.5655	2	2.6389e-11			6.0858e-06
Grain_env2_r1	GLM | mrMLM-ML	QTN-sf0208319008	T/C	2	8319008	19.7852	2	2.0072e-08														5.07341e-06	4.5189
Grain_env2_r1	GLM | mrMLM-ML	QTN-sf0909964238	A/G	9	9964238	19.8048	2	1.7497e-08				9.22784e-07	5.2297
Grain_env2_r1	GLM | MLM-SL	QTN-sf0208351440	C/T	2	8351440	20.0539	2	2.2749e-11			4.0038e-06
Grain_env2_r1	GLM | MLM-SL	QTN-sf0825353310	C/T	8	25353310	21.01	2	2.2071e-10	6.2195e-06
Grain_env2_r1	GLM | MLM-SL	QTN-sf0208358096	T/C	2	8358096	21.2355	2	1.5234e-11			3.3119e-06
Grain_env2_r1	GLM | MLM-SL	QTN-sf0208351755	T/C	2	8351755	21.2821	2	1.404e-11			4.6872e-06
Grain_env2_r1	GLM | MLM-SL	QTN-sf0716048041	G/A	7	16048041	21.5403	2	1.0593e-09	3.8978e-06
Grain_env2_r1	GLM | MLM-SL	QTN-sf0716048054	G/A	7	16048054	21.5403	2	1.0593e-09	3.8978e-06
Grain_env2_r1	GLM | MLM-SL	QTN-sf0208528157	A/T	2	8528157	21.8322	2	3.1403e-10			5.0117e-06
Grain_env2_r1	GLM | MLM-SL	QTN-sf0208375767	T/G	2	8375767	21.8962	2	6.2238e-11			5.3656e-06
Grain_env2_r1	GLM | MLM-SL	QTN-sf0208262336	G/T	2	8262336	22.1323	2	3.4574e-11			5.9202e-06
Grain_env2_r1	GLM | MLM-SL	QTN-sf0208262344	G/A	2	8262344	22.1323	2	3.4574e-11			5.9202e-06
Grain_env2_r1	GLM | MLM-SL	QTN-sf0208472376	T/C	2	8472376	22.2433	2	1.9238e-10			5.8372e-06
Grain_env2_r1	GLM | MLM-SL	QTN-sf0208398808	C/T	2	8398808	22.342	2	1.9017e-12			1.0459e-06
Grain_env2_r1	GLM | MLM-SL	QTN-sf0208457648	C/T	2	8457648	22.4931	2	8.3074e-11			5.0234e-06
Grain_env2_r1	GLM | MLM-SL	QTN-sf0208457606	G/A	2	8457606	22.5499	2	9.327e-11			5.9296e-06
Grain_env2_r1	GLM | MLM-SL	QTN-sf0208406167	A/G	2	8406167	22.5787	2	1.2389e-11			5.7465e-06
Grain_env2_r1	GLM | MLM-SL	QTN-sf0208397841	T/C	2	8397841	22.5933	2	1.1744e-11			3.0922e-06
Grain_env2_r1	GLM | MLM-SL	QTN-sf0208397853	A/G	2	8397853	22.5933	2	1.1744e-11			3.0922e-06
Grain_env2_r1	GLM | MLM-SL	QTN-sf0208398709	G/C	2	8398709	22.5933	2	1.1744e-11			3.0922e-06
Grain_env2_r1	GLM | MLM-SL	QTN-sf0208398815	C/G	2	8398815	22.6191	2	1.9623e-12			8.809e-07
Grain_env2_r1	GLM | MLM-SL	QTN-sf0208386024	A/G	2	8386024	22.6446	2	8.1719e-11			5.9891e-06
Grain_env2_r1	GLM | MLM-SL	QTN-sf0208401208	T/C	2	8401208	22.8689	2	4.5331e-11			6.2037e-06
Grain_env2_r1	GLM | MLM-SL	QTN-sf0817659474	A/G	8	17659474	22.8831	3	2.7637e-11		3.075e-06	1.3115e-06
Grain_env2_r1	GLM | MLM-SL	QTN-sf0208390326	C/T	2	8390326	23.0208	2	4.2953e-12			2.3346e-06
Grain_env2_r1	GLM | MLM-SL	QTN-sf0208390391	C/T	2	8390391	23.1961	2	2.2848e-11			5.0283e-06
Grain_env2_r1	GLM | MLM-SL	QTN-sf0208386390	G/A	2	8386390	23.1979	2	2.7935e-12			2.3862e-06
Grain_env2_r1	GLM | MLM-SL	QTN-sf0208385032	G/T	2	8385032	23.2926	2	1.5331e-11			4.0876e-06
Grain_env2_r1	GLM | MLM-SL	QTN-sf0208385038	T/C	2	8385038	23.2926	2	1.5331e-11			4.0876e-06
Grain_env2_r1	GLM | MLM-SL	QTN-sf0208385043	G/T	2	8385043	23.2926	2	1.5331e-11			4.0876e-06
Grain_env2_r1	GLM | MLM-SL	QTN-sf0208389994	T/A	2	8389994	23.4375	3	1.0999e-11	6.2676e-06		5.1519e-06
Grain_env2_r1	GLM | MLM-SL	QTN-sf0208389999	A/G	2	8389999	23.4375	3	1.0999e-11	6.2676e-06		5.1519e-06
Grain_env2_r1	GLM | MLM-SL	QTN-sf0208390381	T/C	2	8390381	23.4533	2	7.7546e-12			3.6781e-06
Grain_env2_r1	GLM | MLM-SL	QTN-sf0208390886	G/A	2	8390886	23.6805	2	6.1671e-12			1.598e-06
Grain_env2_r1	GLM | MLM-SL	QTN-sf0208386988	A/T	2	8386988	23.773	2	4.3795e-12			5.8507e-06
Grain_env2_r1	GLM | MLM-SL	QTN-sf0208387010	C/T	2	8387010	23.773	2	2.8989e-12			4.4284e-06
Grain_env2_r1	GLM | MLM-SL	QTN-sf0208387533	A/G	2	8387533	23.8917	3	4.0568e-12	6.1464e-06		4.4145e-06
Grain_env2_r1	GLM | MLM-SL	QTN-sf0208387536	C/T	2	8387536	23.8917	3	4.0568e-12	6.1464e-06		4.4145e-06
Grain_env2_r1	GLM | MLM-SL	QTN-sf0208387849	T/C	2	8387849	24.3994	2	1.4894e-12			2.0995e-06
Grain_env2_r1	GLM | MLM-SL | mrMLM-ML	QTN-sf0208387938	A/G	2	8387938	24.4443	4	8.471e-13	5.6216e-06		4.4159e-06					3.89045e-06	4.6293
Grain_env2_r1	GLM | MLM-SL	QTN-sf0208387940	T/C	2	8387940	24.4443	2	1.1861e-12			5.3942e-06
Grain_env2_r2	GLM | MLM-SL	QTN-sf0902742215	A/G	9	2742215	0.0526	3	1.1268e-09		3.7138e-06	3.7138e-06
Grain_env2_r2	GLM | MLM-SL	QTN-sf0336203804	A/G	3	36203804	0.1683	3	8.3659e-08		1.0519e-06	1.0519e-06
Grain_env2_r2	GLM | MLM-SL	QTN-sf0904589251	A/T	9	4589251	0.9829	3	2.5465e-10		4.3914e-07	4.3914e-07
Grain_env2_r2	GLM | mrMLM-ML	QTN-sf0204186350	C/T	2	4186350	1.0956	2	1.2424e-08														1e-06	5.1961
Grain_env2_r2	GLM | mrMLM-ML	QTN-sf0419067736	T/C	4	19067736	1.4518	2	2.3986e-09												5.45884e-06	4.4884
Grain_env2_r2	GLM | mrMLM-ML	QTN-sf0519991079	G/A	5	19991079	2.0299	2	1.3645e-10														1.93286e-05	3.964
Grain_env2_r2	MLM-SL | mrMLM-ML	QTN-sf0224317863	A/T	2	24317863	2.3461	3			3.7995e-06	3.7995e-06			8.4489e-07	5.2666
Grain_env2_r2	GLM | mrMLM-ML	QTN-sf0110799569	A/G	1	10799569	2.4648	3	5.7914e-08						2.47059e-08	6.7501							5.98963e-09	7.3481
Grain_env2_r2	GLM | mrMLM-ML	QTN-sf0102534860	G/T	1	2534860	3.0177	2	1.7294e-07										9.72971e-06	4.2484
Grain_env2_r2	GLM | mrMLM-ML	QTN-sf0100905424	T/C	1	905424	3.1223	2	6.0802e-09														2.01697e-08	6.8356
Grain_env2_r2	GLM | mrMLM-ML	QTN-sf0102534852	G/A	1	2534852	3.2727	4	1.444e-07						7.91589e-06	4.334	0.000146724	3.13					5.22276e-09	7.406
Grain_env2_r2	GLM | MLM-SL	QTN-sf1122481829	T/C	11	22481829	3.6828	3	5.1149e-12		2.9842e-06	2.9842e-06
Grain_env2_r2	GLM | mrMLM-ML	QTN-sf1122473642	G/C	11	22473642	3.7622	2	2.2627e-12														2.87541e-18	16.498
Grain_env2_r2	GLM | mrMLM-ML	QTN-sf1126134728	T/C	11	26134728	4.1946	4	2.8236e-08				4.71737e-06	4.5492			4.93856e-06	4.5301			2.10669e-07	5.8486
Grain_env2_r2	GLM | mrMLM-ML	QTN-sf1122401624	T/A	11	22401624	5.3654	2	2.1458e-08						2.57751e-06	4.8008
Grain_env2_r2	GLM | mrMLM-ML	QTN-sf0909854170	T/C	9	9854170	8.3754	3	3.075e-08				5.82774e-08	6.3887	1.24968e-05	4.1446
Grain_env2_r2	MLM-SL | mrMLM-ML	QTN-sf0124044558	A/G	1	24044558	8.5448	4			3.1377e-06	3.1377e-06	3.73508e-11	9.5001					1.92886e-16	14.6958
Grain_env2_r2	GLM | mrMLM-ML	QTN-sf1002316545	G/C	10	2316545	10.581	2	2.88e-07				3.34503e-07	5.6546
Grain_env2_r2	GLM | mrMLM-ML	QTN-sf1122341459	A/T	11	22341459	11.4118	4	2.1577e-11				1.79721e-06	4.9513			0.000111122	3.2438	2.23563e-09	7.7648
Grain_env2_r2	MLM-SL | mrMLM-ML	QTN-sf0816676335	G/A	8	16676335	13.2702	3		3.4807e-07			7.03558e-06	4.383							1.53073e-05	4.0606
Grain_env2_r2	GLM | mrMLM-ML	QTN-sf0803340682	A/G	8	3340682	13.8295	3	7.2204e-09										0.000152968	3.113			3.90032e-07	5.5902
Grain_env2_r2	GLM | mrMLM-ML	QTN-sf0102872596	C/G	1	2872596	15.2781	2	3.0793e-10						9.09704e-05	3.3258
Grain_env2_r2	GLM | mrMLM-ML	QTN-sf1013545585	T/G	10	13545585	17.0152	4	3.5282e-10				4.0879e-09	7.5095					2.20648e-18	16.6115	8.76799e-10	8.161
Grain_env2_r2	GLM | mrMLM-ML	QTN-sf0906935953	A/G	9	6935953	17.7401	4	7.7876e-08				3.28473e-09	7.602	2.77141e-05	3.8151					3.5465e-05	3.7133
Grain_env2_r2	GLM | MLM-SL	QTN-sf0301664731	C/T	3	1664731	17.9168	2	1.4151e-10	3.998e-06
Grain_env2_r2	GLM | MLM-SL	QTN-sf0301668636	A/G	3	1668636	17.9168	2	1.6544e-10	2.9678e-06
Grain_env2_r2	GLM | mrMLM-ML	QTN-sf1003226621	C/T	10	3226621	17.9618	2	1.3812e-08														2.69712e-05	3.8263
Grain_env2_r2	GLM | MLM-SL | mrMLM-ML	QTN-sf0301665243	G/A	3	1665243	18.2093	7	6.9705e-12	1.2806e-06	2.3068e-06	2.3068e-06	7.30634e-16	14.1257	3.04229e-14	12.5314							3.33119e-20	18.4109
Grain_env2_r2	GLM | mrMLM-ML	QTN-sf0326045639	C/T	3	26045639	18.3422	5	2.1631e-07						4.24913e-06	4.5926			7.03882e-15	13.1568	3.14123e-05	3.7634	3.15065e-08	6.6477
Grain_env2_r2	GLM | mrMLM-ML	QTN-sf0102872850	A/T	1	2872850	19.8433	2	1.1194e-09														3.46737e-05	3.7226
Grain_env2_r2	GLM | MLM-SL	QTN-sf0301648936	T/C	3	1648936	20.1749	2	6.1909e-12	2.8372e-06
Grain_env2_r2	GLM | mrMLM-ML	QTN-sf0818819248	A/G	8	18819248	20.2653	2	2.5468e-08				1.49865e-15	13.8183
Grain_env2_r2	GLM | mrMLM-ML	QTN-sf0626294042	T/C	6	26294042	20.9713	3	5.2607e-08										7.41822e-11	9.2086			3.51156e-06	4.672
Grain_env2_r2	GLM | mrMLM-ML	QTN-sf0818807100	T/G	8	18807100	21.3781	2	4.3071e-10														3.19963e-06	4.7107
Grain_env2_r2	GLM | mrMLM-ML	QTN-sf1117510105	T/C	11	17510105	21.6339	2	1.3603e-09										3.70595e-13	11.4643
Grain_env2_r2	GLM | mrMLM-ML	QTN-sf0208384745	T/C	2	8384745	23.2685	2	1.347e-10						8.55461e-08	6.2272
Grain_env2_r2	GLM | mrMLM-ML	QTN-sf0825353310	C/T	8	25353310	23.4473	2	1.2067e-11								1.72743e-05	4.0105
Grain_env2_r2	GLM | mrMLM-ML	QTN-sf0208387938	A/G	2	8387938	26.0843	2	2.6809e-13								9.11591e-06	4.2754
Grain_BLUP	GLM | MLM-SL	QTN-sf0712502042	C/A	7	12502042	0.1593	2	1.8073e-08			5.9515e-06
Grain_BLUP	GLM | MLM-SL	QTN-sf0904941691	G/A	9	4941691	0.1794	2	9.7603e-08			5.9737e-06
Grain_BLUP	GLM | MLM-SL	QTN-sf0336203804	A/G	3	36203804	0.236	2	1.3905e-07			1.9532e-06
Grain_BLUP	GLM | MLM-SL	QTN-sf0711467819	A/G	7	11467819	0.3646	2	9.6565e-09			4.5887e-06
Grain_BLUP	GLM | MLM-SL	QTN-sf0706538796	C/T	7	6538796	0.4353	2	2.6587e-08			2.4592e-06
Grain_BLUP	GLM | MLM-SL	QTN-sf0805356721	C/T	8	5356721	0.6257	2	2.4747e-09			6.0766e-06
Grain_BLUP	GLM | mrMLM-ML	QTN-sf0419067736	T/C	4	19067736	0.9782	2	1.9441e-08								5.90337e-05	3.5035
Grain_BLUP	GLM | MLM-SL	QTN-sf0904589251	A/T	9	4589251	1.0447	2	2.4221e-10			1.5745e-06
Grain_BLUP	GLM | MLM-SL	QTN-sf0308515260	C/T	3	8515260	1.0762	2	2.9369e-07			5.4862e-06
Grain_BLUP	GLM | mrMLM-ML	QTN-sf1008470926	A/G	10	8470926	1.2488	2	5.0474e-08														5.9731e-06	4.451
Grain_BLUP	GLM | mrMLM-ML	QTN-sf0125062398	C/G	1	25062398	1.2514	2	1.8645e-07						1.68694e-06	4.9777
Grain_BLUP	GLM | MLM-SL	QTN-sf0714494719	T/G	7	14494719	1.3203	2	1.5939e-09			1.4382e-06
Grain_BLUP	GLM | MLM-SL	QTN-sf0100218736	T/G	1	218736	1.6318	2	6.652e-09			5.2727e-06
Grain_BLUP	GLM | MLM-SL	QTN-sf0100218839	A/G	1	218839	1.6318	2	6.652e-09			5.2727e-06
Grain_BLUP	GLM | MLM-SL	QTN-sf0100183055	A/T	1	183055	1.6521	2	1.0258e-08			6.0412e-06
Grain_BLUP	GLM | MLM-SL | mrMLM-ML	QTN-sf0729635310	C/T	7	29635310	1.848	3	2.6838e-08			6.1315e-06											7.16803e-06	4.3752
Grain_BLUP	GLM | MLM-SL	QTN-sf0100267400	G/A	1	267400	2.0994	2	3.1942e-09			3.5386e-06
Grain_BLUP	GLM | MLM-SL	QTN-sf1122467797	A/G	11	22467797	2.8848	2	3.6391e-11			6.0756e-06
Grain_BLUP	GLM | MLM-SL	QTN-sf1122468780	T/C	11	22468780	2.8848	2	3.567e-11			6.1993e-06
Grain_BLUP	GLM | MLM-SL	QTN-sf1122478619	G/C	11	22478619	2.9215	2	2.603e-11			2.2722e-06
Grain_BLUP	GLM | MLM-SL	QTN-sf1122474764	A/G	11	22474764	2.9254	2	8.6759e-12			9.1495e-07
Grain_BLUP	GLM | MLM-SL	QTN-sf1122487388	C/T	11	22487388	2.9254	2	2.7762e-11			3.0468e-06
Grain_BLUP	GLM | mrMLM-ML	QTN-sf0110799569	A/G	1	10799569	2.9862	4	2.7675e-09						4.94994e-05	3.5759			3.06337e-06	4.7289			5.8023e-16	14.2243
Grain_BLUP	GLM | MLM-SL	QTN-sf1122480222	T/C	11	22480222	2.9921	2	3.4032e-11			4.8566e-06
Grain_BLUP	GLM | MLM-SL	QTN-sf1122478475	A/G	11	22478475	2.9932	2	1.585e-11			1.7248e-06
Grain_BLUP	GLM | MLM-SL	QTN-sf1122474933	A/G	11	22474933	3.0109	2	3.4591e-11			2.2388e-06
Grain_BLUP	GLM | MLM-SL	QTN-sf1122482288	T/C	11	22482288	3.0109	2	3.7802e-11			2.7894e-06
Grain_BLUP	GLM | MLM-SL	QTN-sf1122482384	A/G	11	22482384	3.0109	2	1.5328e-11			2.4721e-06
Grain_BLUP	GLM | MLM-SL	QTN-sf1122484470	A/C	11	22484470	3.0109	2	6.9306e-12			1.1513e-06
Grain_BLUP	GLM | MLM-SL	QTN-sf1122484905	G/A	11	22484905	3.0109	2	1.3915e-11			2.5287e-06
Grain_BLUP	GLM | MLM-SL	QTN-sf1122485441	C/T	11	22485441	3.0109	2	3.966e-12			7.2517e-07
Grain_BLUP	GLM | MLM-SL	QTN-sf1122486030	A/G	11	22486030	3.0109	2	3.6016e-11			3.0759e-06
Grain_BLUP	GLM | MLM-SL	QTN-sf1122486377	C/T	11	22486377	3.0109	2	3.0113e-11			2.2831e-06
Grain_BLUP	GLM | MLM-SL	QTN-sf1122487128	C/T	11	22487128	3.0109	2	2.2667e-11			2.1906e-06
Grain_BLUP	GLM | MLM-SL	QTN-sf1122486899	C/T	11	22486899	3.0124	2	2.3603e-11			2.8657e-06
Grain_BLUP	GLM | MLM-SL	QTN-sf1122479488	T/C	11	22479488	3.045	2	6.5065e-11			1.8414e-06
Grain_BLUP	GLM | MLM-SL	QTN-sf1122468914	A/G	11	22468914	3.0933	2	9.7572e-12			6.1777e-06
Grain_BLUP	GLM | mrMLM-ML	QTN-sf0102534852	G/A	1	2534852	3.1113	2	2.6892e-07						4.9877e-15	13.3041
Grain_BLUP	GLM | MLM-SL	QTN-sf1122481829	T/C	11	22481829	3.1256	2	3.5629e-11			9.3004e-07
Grain_BLUP	GLM | MLM-SL	QTN-sf1122478755	T/C	11	22478755	3.1544	2	5.4234e-12			4.9061e-07
Grain_BLUP	GLM | MLM-SL	QTN-sf1122478730	A/G	11	22478730	3.1683	2	3.7082e-12			7.677e-07
Grain_BLUP	GLM | mrMLM-ML	QTN-sf0721429569	A/G	7	21429569	3.1883	2	1.8538e-08												0.000161994	3.0896
Grain_BLUP	GLM | MLM-SL | mrMLM-ML	QTN-sf1122482745	T/C	11	22482745	3.2355	3	8.9144e-12			7.6971e-07											1.64437e-11	9.8489
Grain_BLUP	GLM | MLM-SL	QTN-sf1122473642	G/C	11	22473642	3.2561	2	6.7082e-12			1.2326e-06
Grain_BLUP	GLM | MLM-SL	QTN-sf1122474878	T/C	11	22474878	3.2561	2	1.4694e-11			1.8655e-06
Grain_BLUP	GLM | MLM-SL	QTN-sf1122480851	A/G	11	22480851	3.2561	2	1.591e-11			2.2936e-06
Grain_BLUP	GLM | MLM-SL	QTN-sf1122481108	A/C	11	22481108	3.2561	2	1.591e-11			2.2936e-06
Grain_BLUP	GLM | MLM-SL	QTN-sf1122481560	G/A	11	22481560	3.2561	2	1.4266e-11			2.613e-06
Grain_BLUP	GLM | MLM-SL	QTN-sf1122481969	A/G	11	22481969	3.2561	2	1.591e-11			2.2936e-06
Grain_BLUP	GLM | MLM-SL	QTN-sf1122482189	T/C	11	22482189	3.2561	2	1.6416e-11			2.2555e-06
Grain_BLUP	GLM | mrMLM-ML	QTN-sf0110799408	A/C	1	10799408	3.2773	2	1.4526e-09												5.61953e-05	3.5237
Grain_BLUP	GLM | mrMLM-ML	QTN-sf0100782507	T/A	1	782507	3.4172	2	2.838e-08														1.27292e-05	4.137
Grain_BLUP	GLM | mrMLM-ML	QTN-sf0105539291	T/C	1	5539291	3.6049	2	1.2284e-08												0.000106512	3.2612
Grain_BLUP	GLM | MLM-SL	QTN-sf1122477125	T/C	11	22477125	3.6177	2	3.273e-11			4.6757e-06
Grain_BLUP	GLM | MLM-SL	QTN-sf1122478666	A/G	11	22478666	3.6569	2	1.137e-12			3.6024e-07
Grain_BLUP	GLM | mrMLM-ML	QTN-sf1122413591	A/G	11	22413591	5.755	2	3.1137e-11						1.83738e-09	7.8478
Grain_BLUP	GLM | mrMLM-ML	QTN-sf0105482104	G/A	1	5482104	9.2658	2	2.0371e-08				9.85598e-05	3.293
Grain_BLUP	GLM | MLM-SL | mrMLM-ML	QTN-sf1115557171	T/C	11	15557171	9.6879	4	1.0083e-07	1.9268e-06											3.37287e-05	3.734	9.70287e-07	5.2087
Grain_BLUP	MLM-SL | mrMLM-ML	QTN-sf0817545769	A/G	8	17545769	10.5843	2		5.887e-06					7.8361e-06	4.3382
Grain_BLUP	GLM | mrMLM-ML	QTN-sf1000716591	T/C	10	716591	10.6584	2	1.8609e-08												7.40287e-06	4.3618
Grain_BLUP	GLM | mrMLM-ML	QTN-sf1122341459	A/T	11	22341459	12.2712	3	2.089e-12										2.37958e-16	14.6059	1.86853e-09	7.8406
Grain_BLUP	MLM-SL | mrMLM-ML	QTN-sf0816676335	G/A	8	16676335	13.2365	5		9.0454e-07					1.06807e-06	5.1686			5.85599e-05	3.5068	3.60662e-06	4.6609	3.45223e-05	3.7244
Grain_BLUP	GLM | mrMLM-ML	QTN-sf0803424509	C/A	8	3424509	13.7313	2	1.0041e-07										5.16416e-05	3.5585
Grain_BLUP	GLM | MLM-SL	QTN-sf0103081049	A/C	1	3081049	14.4079	2	4.0999e-08			5.2833e-07
Grain_BLUP	GLM | MLM-SL	QTN-sf0103080456	A/G	1	3080456	15.3899	2	1.0649e-07			4.2376e-06
Grain_BLUP	GLM | MLM-SL	QTN-sf0103080463	A/G	1	3080463	15.3899	2	1.0649e-07			4.2376e-06
Grain_BLUP	GLM | MLM-SL	QTN-sf0103080436	A/T	1	3080436	15.8206	2	1.434e-07			4.5091e-06
Grain_BLUP	GLM | MLM-SL	QTN-sf0103080437	G/A	1	3080437	15.8206	2	1.434e-07			4.5091e-06
Grain_BLUP	GLM | MLM-SL	QTN-sf0103080454	C/T	1	3080454	15.8206	2	1.434e-07			4.5091e-06
Grain_BLUP	GLM | mrMLM-ML	QTN-sf1013545585	T/G	10	13545585	16.0542	2	3.6627e-09										2.60735e-09	7.6997
Grain_BLUP	MLM-SL | mrMLM-ML	QTN-sf0621242454	G/A	6	21242454	16.6393	2		4.174e-07													8.41977e-17	15.0507
Grain_BLUP	MLM-SL | mrMLM-ML	QTN-sf0816895590	C/T	8	16895590	18.0134	2		4.8584e-06									4.20049e-06	4.5974
Grain_BLUP	GLM | MLM-SL	QTN-sf0301665599	G/A	3	1665599	18.2016	2	9.8041e-11			6.2157e-06
Grain_BLUP	GLM | MLM-SL | mrMLM-ML	QTN-sf0301665243	G/A	3	1665243	18.8468	4	3.6752e-12	1.621e-06	2.6705e-06								1.94357e-11	9.7778
Grain_BLUP	GLM | MLM-SL	QTN-sf0301664705	T/C	3	1664705	18.8586	2	4.3759e-11			4.3674e-06
Grain_BLUP	GLM | MLM-SL	QTN-sf0301664731	C/T	3	1664731	18.8586	2	4.6298e-11			3.0575e-06
Grain_BLUP	GLM | MLM-SL	QTN-sf0301668636	A/G	3	1668636	18.8586	2	4.9758e-11			2.2502e-06
Grain_BLUP	GLM | mrMLM-ML	QTN-sf0125637099	G/A	1	25637099	18.8736	2	2.7926e-07										3.98749e-07	5.581
Grain_BLUP	GLM | mrMLM-ML	QTN-sf0906935953	A/G	9	6935953	18.9014	3	3.7412e-08						2.60375e-11	9.6535							5.40381e-08	6.4205
Grain_BLUP	GLM | mrMLM-ML	QTN-sf0712902215	T/C	7	12902215	19.4709	2	4.4929e-08				4.16965e-08	6.5296
Grain_BLUP	GLM | mrMLM-ML	QTN-sf0326045639	C/T	3	26045639	19.8999	4	7.5218e-08				6.48784e-05	3.4646					2.66686e-10	8.6655			1.40152e-05	4.0971
Grain_BLUP	GLM | MLM-SL	QTN-sf0102852574	A/G	1	2852574	20.4583	2	5.5865e-08			4.0505e-06
Grain_BLUP	GLM | mrMLM-ML	QTN-sf0510629859	C/T	5	10629859	20.4926	3	3.4112e-08						9.3218e-07	5.2255					1.43021e-05	4.0887
Grain_BLUP	GLM | mrMLM-ML	QTN-sf0102875362	A/T	1	2875362	20.7921	2	3.0216e-08								1.32404e-12	10.9214
Grain_BLUP	GLM | MLM-SL	QTN-sf0301649879	A/G	3	1649879	21.2249	2	1.3249e-12			5.1157e-06
Grain_BLUP	GLM | MLM-SL	QTN-sf0208351440	C/T	2	8351440	21.4295	2	2.0882e-11			3.4124e-06
Grain_BLUP	GLM | MLM-SL | mrMLM-ML	QTN-sf0301648936	T/C	3	1648936	21.5256	5	9.0291e-13	1.8148e-06					4.38228e-14	12.3755					6.7515e-09	7.2975	4.16582e-07	5.5626
Grain_BLUP	GLM | MLM-SL	QTN-sf0301649005	T/A	3	1649005	21.5256	2	7.1158e-13			4.4005e-06
Grain_BLUP	GLM | mrMLM-ML	QTN-sf1117808500	T/C	11	17808500	21.6579	2	1.0843e-09										7.24436e-11	9.2186
Grain_BLUP	GLM | mrMLM-ML	QTN-sf1002270309	A/T	10	2270309	22.0863	2	3.688e-09										3.5917e-07	5.6248
Grain_BLUP	GLM | MLM-SL	QTN-sf0208408525	A/G	2	8408525	22.7016	2	1.3212e-11			5.5347e-06
Grain_BLUP	GLM | MLM-SL	QTN-sf0208358683	A/G	2	8358683	22.8976	2	1.8354e-11			4.6394e-06
Grain_BLUP	GLM | mrMLM-ML	QTN-sf0208424730	G/A	2	8424730	23.0956	2	5.2953e-10										2.98057e-08	6.671
Grain_BLUP	GLM | MLM-SL	QTN-sf0208358096	T/C	2	8358096	23.2799	2	1.2874e-11			3.8754e-06
Grain_BLUP	GLM | MLM-SL	QTN-sf0208351755	T/C	2	8351755	23.5091	2	1.0872e-11			4.9078e-06
Grain_BLUP	GLM | MLM-SL	QTN-sf0208375767	T/G	2	8375767	24.4447	2	5.0485e-11			5.4774e-06
Grain_BLUP	GLM | MLM-SL	QTN-sf0208397841	T/C	2	8397841	25.0363	2	1.2057e-11			5.2916e-06
Grain_BLUP	GLM | MLM-SL	QTN-sf0208397853	A/G	2	8397853	25.0363	2	1.2057e-11			5.2916e-06
Grain_BLUP	GLM | MLM-SL	QTN-sf0208398709	G/C	2	8398709	25.0363	2	1.2057e-11			5.2916e-06
Grain_BLUP	GLM | MLM-SL	QTN-sf0825353533	G/A	8	25353533	25.0893	2	1.2309e-11	4.5856e-06
Grain_BLUP	GLM | MLM-SL	QTN-sf0208386024	A/G	2	8386024	25.2815	2	4.8503e-11			5.4598e-06
Grain_BLUP	GLM | MLM-SL	QTN-sf0208457648	C/T	2	8457648	25.3523	2	3.4573e-11			2.9936e-06
Grain_BLUP	GLM | MLM-SL	QTN-sf0825352673	G/A	8	25352673	25.4435	2	4.8712e-12	6.1946e-06
Grain_BLUP	GLM | MLM-SL	QTN-sf0208401208	T/C	2	8401208	25.4632	2	3.3273e-11			4.3511e-06
Grain_BLUP	GLM | MLM-SL	QTN-sf0208386390	G/A	2	8386390	25.7059	2	2.2798e-12			5.555e-06
Grain_BLUP	GLM | MLM-SL	QTN-sf0208262336	G/T	2	8262336	25.7281	2	2.098e-12			3.0761e-06
Grain_BLUP	GLM | MLM-SL	QTN-sf0208262344	G/A	2	8262344	25.7281	2	2.098e-12			3.0761e-06
Grain_BLUP	GLM | MLM-SL	QTN-sf0825352803	C/T	8	25352803	25.7443	4	8.9172e-13	2.2504e-06	1.5632e-06	3.0659e-06
Grain_BLUP	GLM | MLM-SL	QTN-sf0208401263	T/G	2	8401263	25.7534	2	1.9224e-11			3.9952e-06
Grain_BLUP	GLM | MLM-SL	QTN-sf0208401275	C/G	2	8401275	25.7534	2	1.9224e-11			3.9952e-06
Grain_BLUP	GLM | MLM-SL	QTN-sf0208401285	A/G	2	8401285	25.8179	2	1.7978e-11			2.5541e-06
Grain_BLUP	GLM | MLM-SL	QTN-sf0208267812	C/T	2	8267812	25.8842	2	1.4328e-12			4.8706e-06
Grain_BLUP	GLM | MLM-SL | mrMLM-ML	QTN-sf0825353310	C/T	8	25353310	26.0016	8	4.1514e-13	1.7281e-06	1.0794e-06	2.3929e-06			2.12471e-05	3.9249	7.47137e-09	7.2547	4.07568e-07	5.5718			9.81974e-06	4.2446
Grain_BLUP	GLM | MLM-SL	QTN-sf0825352369	C/T	8	25352369	26.0016	3	8.2274e-13	5.3055e-06	4.0347e-06
Grain_BLUP	GLM | MLM-SL	QTN-sf0208382764	T/C	2	8382764	26.443	2	3.3399e-12			2.6118e-06
Grain_BLUP	GLM | mrMLM-ML	QTN-sf0716048041	G/A	7	16048041	26.935	2	7.3433e-13								2.13895e-09	7.7835
Grain_BLUP	GLM | mrMLM-ML	QTN-sf0208387938	A/G	2	8387938	27.6483	2	8.9861e-14								4.79402e-07	5.5038
Leaf_env3_r1	GLM | MLM-SL	QTN-sf0724846754	G/A	7	24846754	0.1348	2	9.6594e-10	1.329e-06
Leaf_env3_r1	GLM | mrMLM-ML	QTN-sf0200325193	C/T	2	325193	0.3101	3	1.7736e-10								4.02717e-06	4.615					9.89464e-05	3.2914
Leaf_env3_r1	GLM | mrMLM-ML	QTN-sf1119083279	A/G	11	19083279	0.5102	2	1.7122e-07														0.000142856	3.141
Leaf_env3_r1	GLM | MLM-SL | mrMLM-ML	QTN-sf0724846757	A/G	7	24846757	0.6373	4	6.2397e-11	1.8986e-07							4.79733e-06	4.5421					6.3944e-09	7.3205
Leaf_env3_r1	GLM | MLM-SL	QTN-sf0300274740	A/C	3	274740	1.4575	4	1.2646e-10	1.2046e-06	1.85e-06	1.98e-06
Leaf_env3_r1	MLM-SL | mrMLM-ML	QTN-sf0616639561	C/T	6	16639561	2.3001	4		4.594e-06			7.06806e-14	12.1714							2.63209e-06	4.7921	6.54787e-10	8.2847
Leaf_env3_r1	GLM | MLM-SL | mrMLM-ML	QTN-sf0908410321	T/C	9	8410321	3.1983	3	2.4158e-07	1.874e-06					0.000115133	3.2293
Leaf_env3_r1	MLM-SL | mrMLM-ML	QTN-sf0603336542	C/T	6	3336542	3.3524	4		4.4542e-06					5.70033e-13	11.2807	1.43417e-05	4.0875					1.02094e-05	4.2284
Leaf_env3_r1	GLM | mrMLM-ML	QTN-sf0914166721	T/G	9	14166721	3.9113	2	1.6108e-08												5.71874e-05	3.5165
Leaf_env3_r1	GLM | mrMLM-ML	QTN-sf1105590082	C/A	11	5590082	4.2008	3	7.6152e-09						1.44278e-10	8.9261					1.30617e-07	6.0493
Leaf_env3_r1	GLM | mrMLM-ML	QTN-sf1105590599	G/C	11	5590599	4.4871	2	2.0947e-08				4.87528e-11	9.3868
Leaf_env3_r1	GLM | mrMLM-ML	QTN-sf1105433086	C/T	11	5433086	4.9552	2	3.7725e-10														3.83354e-11	9.489
Leaf_env3_r1	GLM | mrMLM-ML	QTN-sf0720880592	G/A	7	20880592	5.8731	2	5.6822e-08						6.95985e-05	3.4358
Leaf_env3_r1	MLM-SL | mrMLM-ML	QTN-sf1126737132	C/A	11	26737132	6.1399	4		3.7053e-06							1.86724e-05	3.9783
Leaf_env3_r1	GLM | MLM-SL	QTN-sf0234074108	T/C	2	34074108	7.2612	3	4.2816e-09		5.32e-08	6.59e-08
Leaf_env3_r1	GLM | mrMLM-ML	QTN-sf0907949654	C/T	9	7949654	8.5	2	2.6668e-10												1.68655e-05	4.0204
Leaf_env3_r1	GLM | mrMLM-ML	QTN-sf1215057287	T/G	12	15057287	9.0799	2	1.9035e-07												2.62301e-05	3.8378
Leaf_env3_r1	GLM | MLM-SL	QTN-sf0907957627	C/T	9	7957627	9.2323	2	5.6444e-11	6.1973e-06
Leaf_env3_r1	GLM | MLM-SL	QTN-sf0907959164	G/A	9	7959164	9.3189	2	6.3443e-11	4.5417e-06
Leaf_env3_r1	GLM | MLM-SL | mrMLM-ML	QTN-sf0822892970	T/C	8	22892970	9.8692	5	3.6653e-08	6.7651e-07					2.52755e-12	10.646	2.16621e-05	3.9169					1.20476e-11	9.9812
Leaf_env3_r1	GLM | mrMLM-ML	QTN-sf0610242304	T/A	6	10242304	10.1849	2	1.3652e-07						3.5465e-05	3.7133
Leaf_env3_r1	GLM | mrMLM-ML	QTN-sf1210991000	T/C	12	10991000	10.3973	2	7.7892e-08						1.03467e-07	6.1472
Leaf_env3_r1	GLM | mrMLM-ML	QTN-sf0132481926	A/G	1	32481926	11.3244	2	2.6049e-13														6.96787e-07	5.3472
Leaf_env3_r1	GLM | mrMLM-ML	QTN-sf0500976488	G/A	5	976488	11.8092	3	1.224e-09				9.20662e-15	13.0421	2.39828e-15	13.6172
Leaf_env3_r1	GLM | mrMLM-ML	QTN-sf0401746319	A/G	4	1746319	12.1145	2	3.8527e-08														2.16123e-12	10.7127
Leaf_env3_r1	GLM | mrMLM-ML	QTN-sf0822679846	T/G	8	22679846	13.1926	2	2.1115e-09														1.81426e-06	4.9473
Leaf_env3_r1	GLM | mrMLM-ML	QTN-sf0135366231	T/C	1	35366231	15.301	2	8.2646e-11								9.73868e-06	4.248
Leaf_env3_r1	GLM | mrMLM-ML	QTN-sf0140574604	A/G	1	40574604	16.1777	2	4.2301e-13								1.15372e-05	4.1777
Leaf_env3_r2	MLM-SL | mrMLM-ML	QTN-sf0811836149	A/T	8	11836149	0.2722	3			2.83e-06	3.3e-06	4.58353e-08	6.4898
Leaf_env3_r2	GLM | mrMLM-ML	QTN-sf0313362241	G/A	3	13362241	0.314	2	6.397e-08														2.85957e-06	4.7576
Leaf_env3_r2	GLM | MLM-SL	QTN-sf0314990800	T/C	3	14990800	0.8495	2	1.7744e-10	5.11e-06
Leaf_env3_r2	GLM | mrMLM-ML	QTN-sf0314973830	T/A	3	14973830	0.9786	2	1.8499e-09														8.50746e-06	4.3041
Leaf_env3_r2	MLM-SL | mrMLM-ML	QTN-sf0111240543	G/A	1	11240543	1.4952	4		4.6971e-06					1.73141e-06	4.9668	0.000177296	3.0527					0.000183992	3.0375
Leaf_env3_r2	GLM | MLM-SL | mrMLM-ML	QTN-sf0702729577	C/G	7	2729577	2.3482	9	9.6257e-09	4.5151e-06	3.58e-06	5.99e-06	3.9564e-05	3.6683	7.36716e-09	7.2607	1.20282e-05	4.1604	3.96187e-14	12.4186			6.57355e-07	5.3716
Leaf_env3_r2	GLM | MLM-SL	QTN-sf0617991089	A/C	6	17991089	3.4264	3	7.4509e-09	4.4481e-06	4.51e-06
Leaf_env3_r2	GLM | mrMLM-ML	QTN-sf0808637911	C/T	8	8637911	3.4909	2	1.0028e-07												2.4485e-10	8.7017
Leaf_env3_r2	GLM | mrMLM-ML	QTN-sf0618927331	A/C	6	18927331	4.0449	2	5.6283e-08														3.03319e-10	8.6109
Leaf_env3_r2	GLM | mrMLM-ML	QTN-sf0619387565	A/G	6	19387565	4.5668	3	3.8938e-09				1.60805e-08	6.9312	6.47143e-07	5.3782
Leaf_env3_r2	GLM | mrMLM-ML	QTN-sf0810152379	T/A	8	10152379	4.7258	2	2.5809e-08												7.20112e-05	3.4218
Leaf_env3_r2	MLM-SL | mrMLM-ML	QTN-sf1125211464	G/A	11	25211464	5.1965	3		3.6983e-06					2.29615e-06	4.849							2.22229e-06	4.8627
Leaf_env3_r2	GLM | mrMLM-ML	QTN-sf0806558186	G/A	8	6558186	6.2265	3	1.0749e-07										3.83619e-07	5.5972	4.27169e-07	5.5521
Leaf_env3_r2	GLM | mrMLM-ML	QTN-sf0327517421	C/T	3	27517421	6.9847	2	3.0898e-07												1.58782e-06	5.003
Leaf_env3_r2	GLM | mrMLM-ML	QTN-sf0207239404	G/A	2	7239404	10.0987	2	9.7396e-08								2.53746e-06	4.8074
Leaf_env3_r2	GLM | MLM-SL	QTN-sf0103424318	G/A	1	3424318	10.3528	2	1.9385e-07	5.6529e-06
Leaf_env3_r2	GLM | MLM-SL	QTN-sf0103421219	T/G	1	3421219	10.4218	2	2.7603e-07	5.5764e-06
Leaf_env3_r2	GLM | MLM-SL	QTN-sf0103407253	C/T	1	3407253	10.5678	2	1.2699e-07	6.0635e-06
Leaf_env3_r2	GLM | MLM-SL	QTN-sf0103416507	C/A	1	3416507	10.5678	2	2.0317e-07	2.6427e-06
Leaf_env3_r2	GLM | MLM-SL	QTN-sf0103425931	C/T	1	3425931	10.6228	2	1.5163e-07	4.9552e-06
Leaf_env3_r2	GLM | MLM-SL	QTN-sf0103413682	T/C	1	3413682	10.7398	2	1.057e-07	4.2803e-06
Leaf_env3_r2	GLM | MLM-SL	QTN-sf0103404473	C/T	1	3404473	10.77	2	8.1591e-08	2.1237e-06
Leaf_env3_r2	GLM | MLM-SL	QTN-sf0103414127	C/T	1	3414127	10.77	2	1.1767e-07	4.6405e-06
Leaf_env3_r2	GLM | MLM-SL	QTN-sf0103418053	A/C	1	3418053	11.2099	2	1.7755e-07	2.9223e-06
Leaf_env3_r2	GLM | MLM-SL	QTN-sf0103415308	G/A	1	3415308	11.2481	2	2.9784e-08	2.4129e-06
Leaf_env3_r2	GLM | MLM-SL	QTN-sf0103415319	C/T	1	3415319	11.2481	2	2.9784e-08	2.4129e-06
Leaf_env3_r2	GLM | MLM-SL	QTN-sf0103418035	G/A	1	3418035	11.3645	2	1.5682e-07	2.9305e-06
Leaf_env3_r2	GLM | mrMLM-ML	QTN-sf0314034319	A/T	3	14034319	11.3974	2	7.6823e-08										2.38506e-10	8.7128
Leaf_env3_r2	GLM | MLM-SL	QTN-sf0103409401	C/T	1	3409401	11.6238	2	5.5243e-08	6.3441e-07
Leaf_env3_r2	GLM | MLM-SL	QTN-sf0207234236	C/T	2	7234236	12.2074	2	1.1771e-09	5.64e-06
Leaf_BLUP	GLM | MLM-SL	QTN-sf0122940874	C/T	1	22940874	0.0325	3	4.2863e-12		2.822e-06	4.153e-06
Leaf_BLUP	GLM | MLM-SL | mrMLM-ML	QTN-sf0200325193	C/T	2	325193	0.2065	5	4.1891e-11	2.4742e-06	1.2548e-06	2.7289e-06					2.63694e-06	4.7913
Leaf_BLUP	GLM | mrMLM-ML	QTN-sf0315028823	C/T	3	15028823	0.3142	2	5.4566e-08														2.57158e-05	3.846
Leaf_BLUP	MLM-SL | mrMLM-ML	QTN-sf0120803291	C/T	1	20803291	0.933	3	6.2369e-06						4.26678e-07	5.5526							0.000193019	3.018
Leaf_BLUP	GLM | MLM-SL | mrMLM-ML	QTN-sf0702729577	C/G	7	2729577	1.5952	4	1.4789e-08		5.2906e-06				5.09448e-05	3.5641					1.2598e-07	6.0645
Leaf_BLUP	GLM | MLM-SL	QTN-sf0617991089	A/C	6	17991089	2.9711	2	2.7063e-09		6.0542e-06
Leaf_BLUP	GLM | MLM-SL	QTN-sf0803680376	T/C	8	3680376	3.4029	4	2.438e-11	2.7359e-06	2.2645e-06	5.4136e-06
Leaf_BLUP	GLM | mrMLM-ML	QTN-sf1111821726	C/T	11	11821726	3.5666	3	1.6317e-07						1.88018e-08	6.8653							8.10028e-06	4.3244
Leaf_BLUP	GLM | mrMLM-ML	QTN-sf0619387565	A/G	6	19387565	4.3281	2	6.8915e-10						5.12861e-07	5.4755
Leaf_BLUP	GLM | mrMLM-ML	QTN-sf0603565327	C/T	6	3565327	4.7041	3	1.1635e-12						1.43979e-10	8.927							9.96782e-05	3.2883
Leaf_BLUP	GLM | mrMLM-ML	QTN-sf0810152379	T/A	8	10152379	6.1214	2	7.0455e-11												7.28618e-05	3.4169
Leaf_BLUP	MLM-SL | mrMLM-ML	QTN-sf0420956354	T/C	4	20956354	6.531	3	5.3908e-06						3.72735e-09	7.5486					6.21298e-05	3.4824
Leaf_BLUP	GLM | mrMLM-ML	QTN-sf0413405201	G/A	4	13405201	6.9284	2	8.0558e-09						1.92486e-09	7.8281
Leaf_BLUP	GLM | mrMLM-ML	QTN-sf1206196095	A/C	12	6196095	7.9603	2	6.3933e-08						6.36063e-05	3.4728
Leaf_BLUP	GLM | MLM-SL	QTN-sf1119460397	G/A	11	19460397	8.1585	3	1.5334e-12		5.6554e-06	5.426e-06
Leaf_BLUP	GLM | mrMLM-ML	QTN-sf0432042044	T/C	4	32042044	8.94	3	7.1032e-11												4.95108e-05	3.5758	1.21088e-09	8.0243
Leaf_BLUP	GLM | mrMLM-ML	QTN-sf1127103391	C/T	11	27103391	9.3836	2	2.5906e-08														1.23709e-06	5.1072
Leaf_BLUP	GLM | mrMLM-ML	QTN-sf0125148136	C/T	1	25148136	11.2431	2	1.2744e-11														5.35797e-20	18.2068
Leaf_BLUP	GLM | mrMLM-ML	QTN-sf1210991000	T/C	12	10991000	13.4485	3	1.364e-09						0.00019756	3.0085	0.000194133	3.0156

## Sheet: Supplementary Table S3
Supplementary Table S3 | Candidate genes of common QTNs.
Dataset	QTN No.	QTN	Chromosome	Distance (kb)	MSU_locus	Functional annotation
Grain_env1_r1	1	QTN-sf0102290936	1	-109	LOC_Os01g04770	retrotransposon protein, putative, unclassified
Grain_env1_r1	1	QTN-sf0102290936	1	-99	LOC_Os01g04780	retrotransposon protein, putative, unclassified
Grain_env1_r1	1	QTN-sf0102290936	1	-93	LOC_Os01g04790	retrotransposon protein, putative, unclassified
Grain_env1_r1	1	QTN-sf0102290936	1	-88	LOC_Os01g04800	B3 DNA binding domain containing protein, expressed
Grain_env1_r1	1	QTN-sf0102290936	1	-69	LOC_Os01g04814	vacuolar protein sorting-associating protein 4B, putative, expressed
Grain_env1_r1	1	QTN-sf0102290936	1	-66	LOC_Os01g04830	hypothetical protein
Grain_env1_r1	1	QTN-sf0102290936	1	-62	LOC_Os01g04840	vacuolar protein sorting-associating protein 4B, putative
Grain_env1_r1	1	QTN-sf0102290936	1	-57	LOC_Os01g04850	retrotransposon protein, putative, unclassified
Grain_env1_r1	1	QTN-sf0102290936	1	-41	LOC_Os01g04860	DUF647 domain containing protein, putative, expressed
Grain_env1_r1	1	QTN-sf0102290936	1	-36	LOC_Os01g04870	WD domain, G-beta repeat domain containing protein, expressed
Grain_env1_r1	1	QTN-sf0102290936	1	-25	LOC_Os01g04880	retrotransposon protein, putative, unclassified, expressed
Grain_env1_r1	1	QTN-sf0102290936	1	-20	LOC_Os01g04900	peptidase M50 family protein, putative, expressed
Grain_env1_r1	1	QTN-sf0102290936	1	-18	LOC_Os01g04910	TP53RK-binding protein, putative, expressed
Grain_env1_r1	1	QTN-sf0102290936	1	-13	LOC_Os01g04920	glycosyl transferase, group 1 domain containing protein, expressed
Grain_env1_r1	1	QTN-sf0102290936	1	-6	LOC_Os01g04930	MYB family transcription factor, putative, expressed
Grain_env1_r1	1	QTN-sf0102290936	1	0	LOC_Os01g04950	peptide transporter PTR2, putative, expressed
Grain_env1_r1	1	QTN-sf0102290936	1	7	LOC_Os01g04960	transposon protein, putative, unclassified
Grain_env1_r1	1	QTN-sf0102290936	1	36	LOC_Os01g04970	hypothetical protein
Grain_env1_r1	1	QTN-sf0102290936	1	44	LOC_Os01g04980	transposon protein, putative, unclassified
Grain_env1_r1	1	QTN-sf0102290936	1	57	LOC_Os01g04990	mitochondrial carrier protein, putative, expressed
Grain_env1_r1	1	QTN-sf0102290936	1	64	LOC_Os01g05000	hypothetical protein
Grain_env1_r1	1	QTN-sf0102290936	1	65	LOC_Os01g05010	mitochondrial glycoprotein, putative, expressed
Grain_env1_r1	1	QTN-sf0102290936	1	69	LOC_Os01g05020	conserved hypothetical protein
Grain_env1_r1	1	QTN-sf0102290936	1	72	LOC_Os01g05030	transposon protein, putative, unclassified
Grain_env1_r1	1	QTN-sf0102290936	1	77	LOC_Os01g05040	hypothetical protein
Grain_env1_r1	1	QTN-sf0102290936	1	80	LOC_Os01g05050	mitochondrial glycoprotein, putative
Grain_env1_r1	1	QTN-sf0102290936	1	82	LOC_Os01g05060	mitochondrial glycoprotein, putative, expressed
Grain_env1_r1	1	QTN-sf0102290936	1	85	LOC_Os01g05064	expressed protein
Grain_env1_r1	1	QTN-sf0102290936	1	86	LOC_Os01g05070	expressed protein
Grain_env1_r1	1	QTN-sf0102290936	1	91	LOC_Os01g05080	thylakoid lumenal protein, putative, expressed
Grain_env1_r1	1	QTN-sf0102290936	1	94	LOC_Os01g05090	expressed protein
Grain_env1_r1	1	QTN-sf0102290936	1	96	LOC_Os01g05100	expressed protein
Grain_env1_r1	1	QTN-sf0102290936	1	101	LOC_Os01g05105	expressed protein
Grain_env1_r1	1	QTN-sf0102290936	1	109	LOC_Os01g05120	ubiquitin fusion degradation protein, putative
Grain_env1_r1	1	QTN-sf0102290936	1	111	LOC_Os01g05130	expressed protein
Grain_env1_r1	1	QTN-sf0102290936	1	114	LOC_Os01g05140	expressed protein
Grain_env1_r2	1	QTN-sf0105974711	1	-106	LOC_Os01g11000	transposon protein, putative, unclassified
Grain_env1_r2	1	QTN-sf0105974711	1	-91	LOC_Os01g11020	conserved hypothetical protein
Grain_env1_r2	1	QTN-sf0105974711	1	-9	LOC_Os01g11140	retrotransposon protein, putative, unclassified
Grain_env1_r2	1	QTN-sf0105974711	1	15	LOC_Os01g11170	hypothetical protein
Grain_env1_r2	1	QTN-sf0105974711	1	19	LOC_Os01g11190	hypothetical protein
Grain_env1_r2	1	QTN-sf0105974711	1	27	LOC_Os01g11210	expressed protein
Grain_env1_r2	1	QTN-sf0105974711	1	87	LOC_Os01g11310	transposon protein, putative, Pong sub-class
Grain_env1_r2	1	QTN-sf0105974711	1	89	LOC_Os01g11320	transposon protein, putative, Pong sub-class
Grain_env1_r2	1	QTN-sf0105974711	1	93	LOC_Os01g11330	retrotransposon protein, putative, unclassified
Grain_env1_r2	1	QTN-sf0105974711	1	-117	LOC_Os01g10980	auxin-induced protein 5NG4, putative
Grain_env1_r2	1	QTN-sf0105974711	1	-111	LOC_Os01g10990	integral membrane protein DUF6 containing protein, expressed
Grain_env1_r2	1	QTN-sf0105974711	1	-97	LOC_Os01g11010	peptide-N4-asparagine amidase A, putative, expressed
Grain_env1_r2	1	QTN-sf0105974711	1	-77	LOC_Os01g11040	SCAR-like protein 2, putative, expressed
Grain_env1_r2	1	QTN-sf0105974711	1	-66	LOC_Os01g11054	phosphoenolpyruvate carboxylase, putative, expressed
Grain_env1_r2	1	QTN-sf0105974711	1	-58	LOC_Os01g11070	Alg9-like mannosyltransferase protein, putative, expressed
Grain_env1_r2	1	QTN-sf0105974711	1	-56	LOC_Os01g11080	transposable element protein, putative, containing Pfam profile: PF03732, Retrotrans_gag
Grain_env1_r2	1	QTN-sf0105974711	1	-41	LOC_Os01g11110	14-3-3 protein, putative, expressed
Grain_env1_r2	1	QTN-sf0105974711	1	-36	LOC_Os01g11120	CID11, putative, expressed
Grain_env1_r2	1	QTN-sf0105974711	1	-21	LOC_Os01g11130	RNA recognition motif containing protein, putative, expressed
Grain_env1_r2	1	QTN-sf0105974711	1	-3	LOC_Os01g11150	gibberellin 2-beta-dioxygenase, putative, expressed
Grain_env1_r2	1	QTN-sf0105974711	1	7	LOC_Os01g11160	amino acid permease family protein, putative, expressed
Grain_env1_r2	1	QTN-sf0105974711	1	24	LOC_Os01g11200	transforming protein myb, putative
Grain_env1_r2	1	QTN-sf0105974711	1	29	LOC_Os01g11220	hydrolase, acting on carbon-nitrogen, putative, expressed
Grain_env1_r2	1	QTN-sf0105974711	1	32	LOC_Os01g11230	SOUL heme-binding protein, putative, expressed
Grain_env1_r2	1	QTN-sf0105974711	1	35	LOC_Os01g11240	DUF538 domain containing protein, putative, expressed
Grain_env1_r2	1	QTN-sf0105974711	1	42	LOC_Os01g11250	potassium channel KAT1, putative, expressed
Grain_env1_r2	1	QTN-sf0105974711	1	49	LOC_Os01g11260	phospho-N-acetylmuramoyl-pentapeptide-transferase, putative, expressed
Grain_env1_r2	1	QTN-sf0105974711	1	55	LOC_Os01g11270	cytochrome P450, putative, expressed
Grain_env1_r2	1	QTN-sf0105974711	1	61	LOC_Os01g11280	cytochrome P450, putative, expressed
Grain_env1_r2	1	QTN-sf0105974711	1	81	LOC_Os01g11300	cytochrome P450, putative, expressed
Grain_env1_r2	1	QTN-sf0105974711	1	100	LOC_Os01g11340	cytochrome P450, putative, expressed
Grain_env1_r2	1	QTN-sf0105974711	1	118	LOC_Os01g11350	bZIP transcription factor domain containing protein, expressed
Grain_env2_r1	1	QTN-sf0100782507	1	-118	LOC_Os01g02210	retrotransposon protein, putative, Ty3-gypsy subclass
Grain_env2_r1	1	QTN-sf0100782507	1	-115	LOC_Os01g02220	retrotransposon protein, putative, Ty3-gypsy subclass
Grain_env2_r1	1	QTN-sf0100782507	1	-112	LOC_Os01g02230	retrotransposon protein, putative, Ty3-gypsy subclass
Grain_env2_r1	1	QTN-sf0100782507	1	-98	LOC_Os01g02240	transposon protein, putative, unclassified
Grain_env2_r1	1	QTN-sf0100782507	1	-89	LOC_Os01g02250	RGA-1, putative
Grain_env2_r1	1	QTN-sf0100782507	1	-87	LOC_Os01g02260	retrotransposon protein, putative, Ty3-gypsy subclass
Grain_env2_r1	1	QTN-sf0100782507	1	-77	LOC_Os01g02270	conserved hypothetical protein
Grain_env2_r1	1	QTN-sf0100782507	1	-69	LOC_Os01g02280	Leucine Rich Repeat family protein
Grain_env2_r1	1	QTN-sf0100782507	1	-60	LOC_Os01g02290	Ser/Thr receptor-like kinase, putative, expressed
Grain_env2_r1	1	QTN-sf0100782507	1	-57	LOC_Os01g02300	receptor kinase ORK10, putative, expressed
Grain_env2_r1	1	QTN-sf0100782507	1	-52	LOC_Os01g02310	expressed protein
Grain_env2_r1	1	QTN-sf0100782507	1	-45	LOC_Os01g02320	protein kinase domain containing protein, expressed
Grain_env2_r1	1	QTN-sf0100782507	1	-41	LOC_Os01g02334	expressed protein
Grain_env2_r1	1	QTN-sf0100782507	1	-38	LOC_Os01g02350	receptor-like kinase ARK1AS, putative, expressed
Grain_env2_r1	1	QTN-sf0100782507	1	-34	LOC_Os01g02360	resistance-related receptor-like kinase, putative, expressed
Grain_env2_r1	1	QTN-sf0100782507	1	-28	LOC_Os01g02370	receptor-like kinase ARK1AS, putative, expressed
Grain_env2_r1	1	QTN-sf0100782507	1	-21	LOC_Os01g02380	retrotransposon protein, putative, Ty3-gypsy subclass
Grain_env2_r1	1	QTN-sf0100782507	1	-13	LOC_Os01g02390	protein kinase domain containing protein, expressed
Grain_env2_r1	1	QTN-sf0100782507	1	-9	LOC_Os01g02400	protein kinase domain containing protein, expressed
Grain_env2_r1	1	QTN-sf0100782507	1	-4	LOC_Os01g02410	protein kinase domain containing protein
Grain_env2_r1	1	QTN-sf0100782507	1	2	LOC_Os01g02430	TAK14, putative, expressed
Grain_env2_r1	1	QTN-sf0100782507	1	6	LOC_Os01g02440	Ser/Thr receptor-like kinase, putative, expressed
Grain_env2_r1	1	QTN-sf0100782507	1	9	LOC_Os01g02450	retrotransposon protein, putative, unclassified
Grain_env2_r1	1	QTN-sf0100782507	1	10	LOC_Os01g02460	receptor kinase LRK10, putative
Grain_env2_r1	1	QTN-sf0100782507	1	13	LOC_Os01g02470	conserved hypothetical protein
Grain_env2_r1	1	QTN-sf0100782507	1	17	LOC_Os01g02480	retrotransposon protein, putative, unclassified
Grain_env2_r1	1	QTN-sf0100782507	1	20	LOC_Os01g02490	expressed protein
Grain_env2_r1	1	QTN-sf0100782507	1	24	LOC_Os01g02500	glutamyl-tRNA amidotransferase, putative
Grain_env2_r1	1	QTN-sf0100782507	1	34	LOC_Os01g02510	retrotransposon protein, putative, unclassified, expressed
Grain_env2_r1	1	QTN-sf0100782507	1	37	LOC_Os01g02520	retrotransposon protein, putative, unclassified
Grain_env2_r1	1	QTN-sf0100782507	1	41	LOC_Os01g02530	retrotransposon protein, putative, unclassified, expressed
Grain_env2_r1	1	QTN-sf0100782507	1	51	LOC_Os01g02540	retrotransposon protein, putative, unclassified
Grain_env2_r1	1	QTN-sf0100782507	1	56	LOC_Os01g02550	protein kinase domain containing protein, expressed
Grain_env2_r1	1	QTN-sf0100782507	1	60	LOC_Os01g02560	Ser/Thr receptor-like kinase, putative, expressed
Grain_env2_r1	1	QTN-sf0100782507	1	68	LOC_Os01g02570	protein kinase domain containing protein, expressed
Grain_env2_r1	1	QTN-sf0100782507	1	74	LOC_Os01g02580	protein kinase domain containing protein
Grain_env2_r1	1	QTN-sf0100782507	1	79	LOC_Os01g02590	receptor-like kinase, putative, expressed
Grain_env2_r1	1	QTN-sf0100782507	1	82	LOC_Os01g02600	Ser/Thr receptor-like kinase, putative, expressed
Grain_env2_r1	1	QTN-sf0100782507	1	86	LOC_Os01g02610	protein kinase domain containing protein
Grain_env2_r1	1	QTN-sf0100782507	1	100	LOC_Os01g02629	retrotransposon protein, putative, unclassified
Grain_env2_r1	1	QTN-sf0100782507	1	108	LOC_Os01g02650	retrotransposon protein, putative, unclassified
Grain_env2_r1	1	QTN-sf0100782507	1	115	LOC_Os01g02660	retrotransposon protein, putative, unclassified
Grain_env2_r2	1	QTN-sf0124044558	1	-108	LOC_Os01g42250	expressed protein
Grain_env2_r2	1	QTN-sf0124044558	1	-42	LOC_Os01g42310	retrotransposon protein, putative, unclassified
Grain_env2_r2	1	QTN-sf0124044558	1	-18	LOC_Os01g42330	retrotransposon protein, putative, unclassified
Grain_env2_r2	1	QTN-sf0124044558	1	-5	LOC_Os01g42340	conserved hypothetical protein
Grain_env2_r2	1	QTN-sf0124044558	1	15	LOC_Os01g42360	hypothetical protein
Grain_env2_r2	1	QTN-sf0124044558	1	77	LOC_Os01g42420	expressed protein
Grain_env2_r2	1	QTN-sf0124044558	1	84	LOC_Os01g42440	hypothetical protein
Grain_env2_r2	1	QTN-sf0124044558	1	-112	LOC_Os01g42234	amino acid permease family protein, putative, expressed
Grain_env2_r2	1	QTN-sf0124044558	1	-95	LOC_Os01g42260	transcriptional corepressor LEUNIG, putative, expressed
Grain_env2_r2	1	QTN-sf0124044558	1	-82	LOC_Os01g42270	transcriptional corepressor LEUNIG, putative
Grain_env2_r2	1	QTN-sf0124044558	1	-73	LOC_Os01g42280	pentatricopeptide, putative, expressed
Grain_env2_r2	1	QTN-sf0124044558	1	-63	LOC_Os01g42294	inactive receptor kinase At2g26730 precursor, putative, expressed
Grain_env2_r2	1	QTN-sf0124044558	1	-25	LOC_Os01g42320	aspartic proteinase nepenthesin-2 precursor, putative
Grain_env2_r2	1	QTN-sf0124044558	1	1	LOC_Os01g42350	pleiotropic drug resistance protein, putative
Grain_env2_r2	1	QTN-sf0124044558	1	19	LOC_Os01g42370	pleiotropic drug resistance protein, putative, expressed
Grain_env2_r2	1	QTN-sf0124044558	1	29	LOC_Os01g42380	pleiotropic drug resistance protein, putative, expressed
Grain_env2_r2	1	QTN-sf0124044558	1	57	LOC_Os01g42400	STE_MEK_ste7_MAP2K.3 - STE kinases include homologs to sterile 7, sterile 11 and sterile 20 from yeast
Grain_env2_r2	1	QTN-sf0124044558	1	61	LOC_Os01g42410	pleiotropic drug resistance protein, putative, expressed
Grain_env2_r2	1	QTN-sf0124044558	1	80	LOC_Os01g42430	vacuolar ATP synthase, putative, expressed
Grain_env2_r2	1	QTN-sf0124044558	1	91	LOC_Os01g42460	BAH domain containing protein, expressed
Grain_env2_r2	1	QTN-sf0124044558	1	100	LOC_Os01g42470	acetyltransferase, GNAT family, putative, expressed
Grain_env2_r2	1	QTN-sf0124044558	1	105	LOC_Os01g42480	Yip1 domain containing protein, expressed
Grain_env2_r2	1	QTN-sf0124044558	1	110	LOC_Os01g42490	endonuclease/exonuclease/phosphatase family domain containing protein, expressed
Grain_env2_r2	1	QTN-sf0124044558	1	117	LOC_Os01g42500	zinc finger, C3HC4 type family protein, expressed
Grain_BLUP	1	QTN-sf0100183055	1	-120	LOC_Os01g01120	enolase-phosphatase E1, putative, expressed
Grain_BLUP	1	QTN-sf0100183055	1	-117	LOC_Os01g01130	snurportin-1, putative, expressed
Grain_BLUP	1	QTN-sf0100183055	1	-113	LOC_Os01g01140	hypothetical protein
Grain_BLUP	1	QTN-sf0100183055	1	-104	LOC_Os01g01150	RNA recognition motif, putative, expressed
Grain_BLUP	1	QTN-sf0100183055	1	-99	LOC_Os01g01160	heat shock protein DnaJ, putative, expressed
Grain_BLUP	1	QTN-sf0100183055	1	-95	LOC_Os01g01170	expressed protein
Grain_BLUP	1	QTN-sf0100183055	1	-94	LOC_Os01g01180	expressed protein
Grain_BLUP	1	QTN-sf0100183055	1	-92	LOC_Os01g01190	phosphoesterase family protein, putative, expressed
Grain_BLUP	1	QTN-sf0100183055	1	-85	LOC_Os01g01200	retrotransposon protein, putative, unclassified
Grain_BLUP	1	QTN-sf0100183055	1	-83	LOC_Os01g01210	retrotransposon protein, putative, unclassified
Grain_BLUP	1	QTN-sf0100183055	1	-77	LOC_Os01g01230	transposon protein, putative, unclassified
Grain_BLUP	1	QTN-sf0100183055	1	-69	LOC_Os01g01240	retrotransposon protein, putative, Ty3-gypsy subclass
Grain_BLUP	1	QTN-sf0100183055	1	-63	LOC_Os01g01250	transposon protein, putative, unclassified
Grain_BLUP	1	QTN-sf0100183055	1	-56	LOC_Os01g01260	transposon protein, putative, unclassified
Grain_BLUP	1	QTN-sf0100183055	1	-50	LOC_Os01g01270	retrotransposon protein, putative, unclassified
Grain_BLUP	1	QTN-sf0100183055	1	-48	LOC_Os01g01280	expressed protein
Grain_BLUP	1	QTN-sf0100183055	1	-42	LOC_Os01g01290	histone-like transcription factor and archaeal histone, putative, expressed
Grain_BLUP	1	QTN-sf0100183055	1	-39	LOC_Os01g01295	expressed protein
Grain_BLUP	1	QTN-sf0100183055	1	-36	LOC_Os01g01302	shikimate kinase, putative, expressed
Grain_BLUP	1	QTN-sf0100183055	1	-33	LOC_Os01g01307	translocon-associated protein beta domain containing protein, expressed
Grain_BLUP	1	QTN-sf0100183055	1	-27	LOC_Os01g01312	retrotransposon protein, putative, Ty1-copia subclass, expressed
Grain_BLUP	1	QTN-sf0100183055	1	-23	LOC_Os01g01320	retrotransposon protein, putative, Ty1-copia subclass
Grain_BLUP	1	QTN-sf0100183055	1	-19	LOC_Os01g01330	retrotransposon protein, putative, Ty1-copia subclass, expressed
Grain_BLUP	1	QTN-sf0100183055	1	-13	LOC_Os01g01340	light-induced protein 1-like, putative, expressed
Grain_BLUP	1	QTN-sf0100183055	1	-10	LOC_Os01g01350	SNF7 domain containing protein, putative, expressed
Grain_BLUP	1	QTN-sf0100183055	1	-3	LOC_Os01g01360	peptide transporter PTR2, putative, expressed
Grain_BLUP	1	QTN-sf0100183055	1	2	LOC_Os01g01369	3-beta-hydroxysteroid-Delta-isomerase, putative, expressed
Grain_BLUP	1	QTN-sf0100183055	1	6	LOC_Os01g01380	expressed protein
Grain_BLUP	1	QTN-sf0100183055	1	13	LOC_Os01g01390	expressed protein
Grain_BLUP	1	QTN-sf0100183055	1	17	LOC_Os01g01400	expressed protein
Grain_BLUP	1	QTN-sf0100183055	1	21	LOC_Os01g01410	TKL_IRAK_C-LEC.1 - TKL_IRAK_C-LEC has homology to C-type lectin receptors, expressed
Grain_BLUP	1	QTN-sf0100183055	1	25	LOC_Os01g01420	expressed protein
Grain_BLUP	1	QTN-sf0100183055	1	32	LOC_Os01g01430	No apical meristem protein, putative, expressed
Grain_BLUP	1	QTN-sf0100183055	1	34	LOC_Os01g01440	conserved hypothetical protein
Grain_BLUP	1	QTN-sf0100183055	1	42	LOC_Os01g01450	stress responsive protein, putative, expressed
Grain_BLUP	1	QTN-sf0100183055	1	48	LOC_Os01g01460	retrotransposon protein, putative, Ty3-gypsy subclass
Grain_BLUP	1	QTN-sf0100183055	1	57	LOC_Os01g01470	no apical meristem protein, putative, expressed
Grain_BLUP	1	QTN-sf0100183055	1	64	LOC_Os01g01484	light-mediated development protein DET1, putative, expressed
Grain_BLUP	1	QTN-sf0100183055	1	75	LOC_Os01g01500	conserved hypothetical protein
Grain_BLUP	1	QTN-sf0100183055	1	77	LOC_Os01g01510	sas10/Utp3 family protein, expressed
Grain_BLUP	1	QTN-sf0100183055	1	86	LOC_Os01g01520	transferase family protein, putative, expressed
Grain_BLUP	1	QTN-sf0100183055	1	92	LOC_Os01g01530	transposon protein, putative, CACTA, En/Spm sub-class
Grain_BLUP	1	QTN-sf0100183055	1	95	LOC_Os01g01540	retrotransposon protein, putative, unclassified
Grain_BLUP	1	QTN-sf0100183055	1	96	LOC_Os01g01550	transposon protein, putative, CACTA, En/Spm sub-class
Grain_BLUP	1	QTN-sf0100183055	1	100	LOC_Os01g01560	transposon protein, putative, unclassified, expressed
Grain_BLUP	1	QTN-sf0100183055	1	104	LOC_Os01g01570	kinesin heavy chain, putative, expressed
Grain_BLUP	1	QTN-sf0100183055	1	108	LOC_Os01g01580	expressed protein
Grain_BLUP	1	QTN-sf0100183055	1	109	LOC_Os01g01590	expressed protein
Grain_env1_r1	2	QTN-sf0102331453	1	-109	LOC_Os01g04814	vacuolar protein sorting-associating protein 4B, putative, expressed
Grain_env1_r1	2	QTN-sf0102331453	1	-107	LOC_Os01g04830	hypothetical protein
Grain_env1_r1	2	QTN-sf0102331453	1	-102	LOC_Os01g04840	vacuolar protein sorting-associating protein 4B, putative
Grain_env1_r1	2	QTN-sf0102331453	1	-97	LOC_Os01g04850	retrotransposon protein, putative, unclassified
Grain_env1_r1	2	QTN-sf0102331453	1	-81	LOC_Os01g04860	DUF647 domain containing protein, putative, expressed
Grain_env1_r1	2	QTN-sf0102331453	1	-77	LOC_Os01g04870	WD domain, G-beta repeat domain containing protein, expressed
Grain_env1_r1	2	QTN-sf0102331453	1	-65	LOC_Os01g04880	retrotransposon protein, putative, unclassified, expressed
Grain_env1_r1	2	QTN-sf0102331453	1	-61	LOC_Os01g04900	peptidase M50 family protein, putative, expressed
Grain_env1_r1	2	QTN-sf0102331453	1	-58	LOC_Os01g04910	TP53RK-binding protein, putative, expressed
Grain_env1_r1	2	QTN-sf0102331453	1	-53	LOC_Os01g04920	glycosyl transferase, group 1 domain containing protein, expressed
Grain_env1_r1	2	QTN-sf0102331453	1	-47	LOC_Os01g04930	MYB family transcription factor, putative, expressed
Grain_env1_r1	2	QTN-sf0102331453	1	-34	LOC_Os01g04950	peptide transporter PTR2, putative, expressed
Grain_env1_r1	2	QTN-sf0102331453	1	-27	LOC_Os01g04960	transposon protein, putative, unclassified
Grain_env1_r1	2	QTN-sf0102331453	1	-3	LOC_Os01g04970	hypothetical protein
Grain_env1_r1	2	QTN-sf0102331453	1	4	LOC_Os01g04980	transposon protein, putative, unclassified
Grain_env1_r1	2	QTN-sf0102331453	1	17	LOC_Os01g04990	mitochondrial carrier protein, putative, expressed
Grain_env1_r1	2	QTN-sf0102331453	1	23	LOC_Os01g05000	hypothetical protein
Grain_env1_r1	2	QTN-sf0102331453	1	25	LOC_Os01g05010	mitochondrial glycoprotein, putative, expressed
Grain_env1_r1	2	QTN-sf0102331453	1	29	LOC_Os01g05020	conserved hypothetical protein
Grain_env1_r1	2	QTN-sf0102331453	1	32	LOC_Os01g05030	transposon protein, putative, unclassified
Grain_env1_r1	2	QTN-sf0102331453	1	37	LOC_Os01g05040	hypothetical protein
Grain_env1_r1	2	QTN-sf0102331453	1	39	LOC_Os01g05050	mitochondrial glycoprotein, putative
Grain_env1_r1	2	QTN-sf0102331453	1	42	LOC_Os01g05060	mitochondrial glycoprotein, putative, expressed
Grain_env1_r1	2	QTN-sf0102331453	1	44	LOC_Os01g05064	expressed protein
Grain_env1_r1	2	QTN-sf0102331453	1	46	LOC_Os01g05070	expressed protein
Grain_env1_r1	2	QTN-sf0102331453	1	51	LOC_Os01g05080	thylakoid lumenal protein, putative, expressed
Grain_env1_r1	2	QTN-sf0102331453	1	53	LOC_Os01g05090	expressed protein
Grain_env1_r1	2	QTN-sf0102331453	1	55	LOC_Os01g05100	expressed protein
Grain_env1_r1	2	QTN-sf0102331453	1	61	LOC_Os01g05105	expressed protein
Grain_env1_r1	2	QTN-sf0102331453	1	68	LOC_Os01g05120	ubiquitin fusion degradation protein, putative
Grain_env1_r1	2	QTN-sf0102331453	1	70	LOC_Os01g05130	expressed protein
Grain_env1_r1	2	QTN-sf0102331453	1	73	LOC_Os01g05140	expressed protein
Grain_env1_r1	2	QTN-sf0102331453	1	81	LOC_Os01g05150	expressed protein
Grain_env1_r1	2	QTN-sf0102331453	1	87	LOC_Os01g05160	hypothetical protein
Grain_env1_r1	2	QTN-sf0102331453	1	89	LOC_Os01g05170	expressed protein
Grain_env1_r1	2	QTN-sf0102331453	1	102	LOC_Os01g05180	expressed protein
Grain_env1_r1	2	QTN-sf0102331453	1	108	LOC_Os01g05200	retrotransposon protein, putative, Ty1-copia subclass
Grain_env1_r1	2	QTN-sf0102331453	1	116	LOC_Os01g05210	hypothetical protein
Grain_env1_r1	2	QTN-sf0102331453	1	120	LOC_Os01g05220	hypothetical protein
Grain_env1_r2	2	QTN-sf0100906859	1	-119	LOC_Os01g02430	TAK14, putative, expressed
Grain_env1_r2	2	QTN-sf0100906859	1	-115	LOC_Os01g02440	Ser/Thr receptor-like kinase, putative, expressed
Grain_env1_r2	2	QTN-sf0100906859	1	-112	LOC_Os01g02460	receptor kinase LRK10, putative
Grain_env1_r2	2	QTN-sf0100906859	1	-98	LOC_Os01g02500	glutamyl-tRNA amidotransferase, putative
Grain_env1_r2	2	QTN-sf0100906859	1	-65	LOC_Os01g02550	protein kinase domain containing protein, expressed
Grain_env1_r2	2	QTN-sf0100906859	1	-60	LOC_Os01g02560	Ser/Thr receptor-like kinase, putative, expressed
Grain_env1_r2	2	QTN-sf0100906859	1	-53	LOC_Os01g02570	protein kinase domain containing protein, expressed
Grain_env1_r2	2	QTN-sf0100906859	1	-47	LOC_Os01g02580	protein kinase domain containing protein
Grain_env1_r2	2	QTN-sf0100906859	1	-42	LOC_Os01g02590	receptor-like kinase, putative, expressed
Grain_env1_r2	2	QTN-sf0100906859	1	-38	LOC_Os01g02600	Ser/Thr receptor-like kinase, putative, expressed
Grain_env1_r2	2	QTN-sf0100906859	1	-33	LOC_Os01g02610	protein kinase domain containing protein
Grain_env1_r2	2	QTN-sf0100906859	1	3	LOC_Os01g02680	protein kinase domain containing protein, expressed
Grain_env1_r2	2	QTN-sf0100906859	1	7	LOC_Os01g02690	resistance-related receptor-like kinase, putative
Grain_env1_r2	2	QTN-sf0100906859	1	13	LOC_Os01g02700	protein kinase domain containing protein, expressed
Grain_env1_r2	2	QTN-sf0100906859	1	16	LOC_Os01g02710	LRk-type protein, putative
Grain_env1_r2	2	QTN-sf0100906859	1	22	LOC_Os01g02720	elongation factor Tu, putative, expressed
Grain_env1_r2	2	QTN-sf0100906859	1	27	LOC_Os01g02730	TAK14, putative, expressed
Grain_env1_r2	2	QTN-sf0100906859	1	46	LOC_Os01g02750	protein kinase domain containing protein, expressed
Grain_env1_r2	2	QTN-sf0100906859	1	50	LOC_Os01g02760	receptor-like kinase, putative, expressed
Grain_env1_r2	2	QTN-sf0100906859	1	53	LOC_Os01g02770	resistance-related receptor-like kinase, putative, expressed
Grain_env1_r2	2	QTN-sf0100906859	1	61	LOC_Os01g02780	TAK33, putative, expressed
Grain_env1_r2	2	QTN-sf0100906859	1	68	LOC_Os01g02790	protein kinase domain containing protein, expressed
Grain_env1_r2	2	QTN-sf0100906859	1	76	LOC_Os01g02800	receptor-like kinase ARK1AS, putative, expressed
Grain_env1_r2	2	QTN-sf0100906859	1	79	LOC_Os01g02810	resistance-related receptor-like kinase, putative
Grain_env1_r2	2	QTN-sf0100906859	1	86	LOC_Os01g02830	receptor-like kinase ARK1AS, putative, expressed
Grain_env1_r2	2	QTN-sf0100906859	1	-113	LOC_Os01g02450	retrotransposon protein, putative, unclassified
Grain_env1_r2	2	QTN-sf0100906859	1	90	LOC_Os01g02840	resistance-related receptor-like kinase, putative
Grain_env1_r2	2	QTN-sf0100906859	1	-110	LOC_Os01g02470	conserved hypothetical protein
Grain_env1_r2	2	QTN-sf0100906859	1	-106	LOC_Os01g02480	retrotransposon protein, putative, unclassified
Grain_env1_r2	2	QTN-sf0100906859	1	-100	LOC_Os01g02490	expressed protein
Grain_env1_r2	2	QTN-sf0100906859	1	102	LOC_Os01g02870	auxin-induced protein 5NG4, putative, expressed
Grain_env1_r2	2	QTN-sf0100906859	1	-89	LOC_Os01g02510	retrotransposon protein, putative, unclassified, expressed
Grain_env1_r2	2	QTN-sf0100906859	1	-83	LOC_Os01g02520	retrotransposon protein, putative, unclassified
Grain_env1_r2	2	QTN-sf0100906859	1	-77	LOC_Os01g02530	retrotransposon protein, putative, unclassified, expressed
Grain_env1_r2	2	QTN-sf0100906859	1	-68	LOC_Os01g02540	retrotransposon protein, putative, unclassified
Grain_env1_r2	2	QTN-sf0100906859	1	108	LOC_Os01g02880	fructose-bisphospate aldolase isozyme, putative, expressed
Grain_env1_r2	2	QTN-sf0100906859	1	-20	LOC_Os01g02629	retrotransposon protein, putative, unclassified
Grain_env1_r2	2	QTN-sf0100906859	1	-9	LOC_Os01g02650	retrotransposon protein, putative, unclassified
Grain_env1_r2	2	QTN-sf0100906859	1	-5	LOC_Os01g02660	retrotransposon protein, putative, unclassified
Grain_env1_r2	2	QTN-sf0100906859	1	32	LOC_Os01g02740	retrotransposon protein, putative, unclassified
Grain_env1_r2	2	QTN-sf0100906859	1	93	LOC_Os01g02850	hypothetical protein
Grain_env1_r2	2	QTN-sf0100906859	1	94	LOC_Os01g02860	expressed protein
Grain_env2_r1	2	QTN-sf0101545236	1	-109	LOC_Os01g03530	multicopper oxidase domain containing protein, expressed
Grain_env2_r1	2	QTN-sf0101545236	1	-100	LOC_Os01g03549	multi-copper oxidase type I family protein, putative, expressed
Grain_env2_r1	2	QTN-sf0101545236	1	-95	LOC_Os01g03570	transcription factor X1, putative, expressed
Grain_env2_r1	2	QTN-sf0101545236	1	-91	LOC_Os01g03580	transposon protein, putative, CACTA, En/Spm sub-class
Grain_env2_r1	2	QTN-sf0101545236	1	-86	LOC_Os01g03590	transposon protein, putative, CACTA, En/Spm sub-class
Grain_env2_r1	2	QTN-sf0101545236	1	-74	LOC_Os01g03600	retrotransposon protein, putative, Ty3-gypsy subclass
Grain_env2_r1	2	QTN-sf0101545236	1	-68	LOC_Os01g03610	retrotransposon protein, putative, unclassified
Grain_env2_r1	2	QTN-sf0101545236	1	-57	LOC_Os01g03620	multicopper oxidase domain containing protein, expressed
Grain_env2_r1	2	QTN-sf0101545236	1	-53	LOC_Os01g03630	multicopper oxidase domain containing protein, expressed
Grain_env2_r1	2	QTN-sf0101545236	1	-45	LOC_Os01g03640	multicopper oxidase domain containing protein, expressed
Grain_env2_r1	2	QTN-sf0101545236	1	-38	LOC_Os01g03650	sufB/sufD domain containing protein, putative, expressed
Grain_env2_r1	2	QTN-sf0101545236	1	-33	LOC_Os01g03660	MYB family transcription factor, putative, expressed
Grain_env2_r1	2	QTN-sf0101545236	1	-31	LOC_Os01g03670	dihydroflavonol-4-reductase, putative, expressed
Grain_env2_r1	2	QTN-sf0101545236	1	-29	LOC_Os01g03680	BBTI8 - Bowman-Birk type bran trypsin inhibitor precursor, expressed
Grain_env2_r1	2	QTN-sf0101545236	1	-24	LOC_Os01g03690	TKL_IRAK_DUF26-lg.1 - DUF26 kinases have homology to DUF26 containing loci, expressed
Grain_env2_r1	2	QTN-sf0101545236	1	-6	LOC_Os01g03710	mannose-6-phosphate isomerase, putative, expressed
Grain_env2_r1	2	QTN-sf0101545236	1	2	LOC_Os01g03720	MYB family transcription factor, putative, expressed
Grain_env2_r1	2	QTN-sf0101545236	1	19	LOC_Os01g03730	nuclease PA3, putative, expressed
Grain_env2_r1	2	QTN-sf0101545236	1	16	LOC_Os01g03740	nuclease PA3, putative, expressed
Grain_env2_r1	2	QTN-sf0101545236	1	23	LOC_Os01g03750	expressed protein
Grain_env2_r1	2	QTN-sf0101545236	1	25	LOC_Os01g03760	expressed protein
Grain_env2_r1	2	QTN-sf0101545236	1	34	LOC_Os01g03770	hypothetical protein
Grain_env2_r1	2	QTN-sf0101545236	1	39	LOC_Os01g03780	retrotransposon protein, putative, unclassified
Grain_env2_r1	2	QTN-sf0101545236	1	46	LOC_Os01g03790	retrotransposon protein, putative, unclassified
Grain_env2_r1	2	QTN-sf0101545236	1	47	LOC_Os01g03800	transposon protein, putative, Mutator sub-class
Grain_env2_r1	2	QTN-sf0101545236	1	51	LOC_Os01g03810	expressed protein
Grain_env2_r1	2	QTN-sf0101545236	1	51	LOC_Os01g03820	C2 domain containing protein, putative, expressed
Grain_env2_r1	2	QTN-sf0101545236	1	62	LOC_Os01g03830	retrotransposon protein, putative, unclassified
Grain_env2_r1	2	QTN-sf0101545236	1	78	LOC_Os01g03840	ZOS1-02 - C2H2 zinc finger protein, expressed
Grain_env2_r1	2	QTN-sf0101545236	1	85	LOC_Os01g03850	hypothetical protein
Grain_env2_r1	2	QTN-sf0101545236	1	91	LOC_Os01g03860	retrotransposon protein, putative, unclassified
Grain_env2_r1	2	QTN-sf0101545236	1	94	LOC_Os01g03870	expressed protein
Grain_env2_r1	2	QTN-sf0101545236	1	100	LOC_Os01g03880	retrotransposon protein, putative, Ty3-gypsy subclass
Grain_env2_r1	2	QTN-sf0101545236	1	111	LOC_Os01g03890	DUF260 domain containing protein, putative, expressed
Grain_env2_r2	2	QTN-sf0102534852	1	-120	LOC_Os01g05150	expressed protein
Grain_env2_r2	2	QTN-sf0102534852	1	-115	LOC_Os01g05160	hypothetical protein
Grain_env2_r2	2	QTN-sf0102534852	1	-112	LOC_Os01g05170	expressed protein
Grain_env2_r2	2	QTN-sf0102534852	1	-97	LOC_Os01g05180	expressed protein
Grain_env2_r2	2	QTN-sf0102534852	1	-90	LOC_Os01g05200	retrotransposon protein, putative, Ty1-copia subclass
Grain_env2_r2	2	QTN-sf0102534852	1	-86	LOC_Os01g05210	hypothetical protein
Grain_env2_r2	2	QTN-sf0102534852	1	-82	LOC_Os01g05220	hypothetical protein
Grain_env2_r2	2	QTN-sf0102534852	1	-77	LOC_Os01g05230	hypothetical protein
Grain_env2_r2	2	QTN-sf0102534852	1	-70	LOC_Os01g05240	retrotransposon protein, putative, unclassified
Grain_env2_r2	2	QTN-sf0102534852	1	-60	LOC_Os01g05250	expressed protein
Grain_env2_r2	2	QTN-sf0102534852	1	-55	LOC_Os01g05260	hypothetical protein
Grain_env2_r2	2	QTN-sf0102534852	1	-47	LOC_Os01g05280	hypothetical protein
Grain_env2_r2	2	QTN-sf0102534852	1	-44	LOC_Os01g05289	expressed protein
Grain_env2_r2	2	QTN-sf0102534852	1	-37	LOC_Os01g05300	hypothetical protein
Grain_env2_r2	2	QTN-sf0102534852	1	-34	LOC_Os01g05310	expressed protein
Grain_env2_r2	2	QTN-sf0102534852	1	-25	LOC_Os01g05320	retrotransposon protein, putative, Ty1-copia subclass
Grain_env2_r2	2	QTN-sf0102534852	1	-20	LOC_Os01g05330	expressed protein
Grain_env2_r2	2	QTN-sf0102534852	1	-13	LOC_Os01g05340	hypothetical protein
Grain_env2_r2	2	QTN-sf0102534852	1	-3	LOC_Os01g05350	hypothetical protein
Grain_env2_r2	2	QTN-sf0102534852	1	0	LOC_Os01g05360	hypothetical protein
Grain_env2_r2	2	QTN-sf0102534852	1	6	LOC_Os01g05380	expressed protein
Grain_env2_r2	2	QTN-sf0102534852	1	12	LOC_Os01g05390	hypothetical protein
Grain_env2_r2	2	QTN-sf0102534852	1	15	LOC_Os01g05400	conserved hypothetical protein
Grain_env2_r2	2	QTN-sf0102534852	1	17	LOC_Os01g05410	hypothetical protein
Grain_env2_r2	2	QTN-sf0102534852	1	37	LOC_Os01g05450	hypothetical protein
Grain_env2_r2	2	QTN-sf0102534852	1	39	LOC_Os01g05460	hypothetical protein
Grain_env2_r2	2	QTN-sf0102534852	1	49	LOC_Os01g05480	expressed protein
Grain_env2_r2	2	QTN-sf0102534852	1	77	LOC_Os01g05510	expressed protein
Grain_env2_r2	2	QTN-sf0102534852	1	93	LOC_Os01g05520	expressed protein
Grain_env2_r2	2	QTN-sf0102534852	1	96	LOC_Os01g05530	expressed protein
Grain_env2_r2	2	QTN-sf0102534852	1	105	LOC_Os01g05540	expressed protein
Grain_env2_r2	2	QTN-sf0102534852	1	115	LOC_Os01g05550	hypothetical protein
Grain_env2_r2	2	QTN-sf0102534852	1	116	LOC_Os01g05560	expressed protein
Grain_env2_r2	2	QTN-sf0102534852	1	25	LOC_Os01g05420	IWS1 C-terminus family protein, putative, expressed
Grain_env2_r2	2	QTN-sf0102534852	1	32	LOC_Os01g05430	OsRhmbd1 - Putative Rhomboid homologue, expressed
Grain_env2_r2	2	QTN-sf0102534852	1	34	LOC_Os01g05440	XH domain containing protein, expressed
Grain_env2_r2	2	QTN-sf0102534852	1	43	LOC_Os01g05470	transcription factor X1, putative, expressed
Grain_env2_r2	2	QTN-sf0102534852	1	53	LOC_Os01g05490	triosephosphate isomerase, cytosolic, putative, expressed
Grain_env2_r2	2	QTN-sf0102534852	1	63	LOC_Os01g05500	zinc finger protein, putative, expressed
Grain_BLUP	2	QTN-sf0100218736	1	-119	LOC_Os01g01210	retrotransposon protein, putative, unclassified
Grain_BLUP	2	QTN-sf0100218736	1	-113	LOC_Os01g01230	transposon protein, putative, unclassified
Grain_BLUP	2	QTN-sf0100218736	1	-104	LOC_Os01g01240	retrotransposon protein, putative, Ty3-gypsy subclass
Grain_BLUP	2	QTN-sf0100218736	1	-99	LOC_Os01g01250	transposon protein, putative, unclassified
Grain_BLUP	2	QTN-sf0100218736	1	-92	LOC_Os01g01260	transposon protein, putative, unclassified
Grain_BLUP	2	QTN-sf0100218736	1	-86	LOC_Os01g01270	retrotransposon protein, putative, unclassified
Grain_BLUP	2	QTN-sf0100218736	1	-84	LOC_Os01g01280	expressed protein
Grain_BLUP	2	QTN-sf0100218736	1	-78	LOC_Os01g01290	histone-like transcription factor and archaeal histone, putative, expressed
Grain_BLUP	2	QTN-sf0100218736	1	-75	LOC_Os01g01295	expressed protein
Grain_BLUP	2	QTN-sf0100218736	1	-71	LOC_Os01g01302	shikimate kinase, putative, expressed
Grain_BLUP	2	QTN-sf0100218736	1	-69	LOC_Os01g01307	translocon-associated protein beta domain containing protein, expressed
Grain_BLUP	2	QTN-sf0100218736	1	-63	LOC_Os01g01312	retrotransposon protein, putative, Ty1-copia subclass, expressed
Grain_BLUP	2	QTN-sf0100218736	1	-58	LOC_Os01g01320	retrotransposon protein, putative, Ty1-copia subclass
Grain_BLUP	2	QTN-sf0100218736	1	-55	LOC_Os01g01330	retrotransposon protein, putative, Ty1-copia subclass, expressed
Grain_BLUP	2	QTN-sf0100218736	1	-49	LOC_Os01g01340	light-induced protein 1-like, putative, expressed
Grain_BLUP	2	QTN-sf0100218736	1	-46	LOC_Os01g01350	SNF7 domain containing protein, putative, expressed
Grain_BLUP	2	QTN-sf0100218736	1	-38	LOC_Os01g01360	peptide transporter PTR2, putative, expressed
Grain_BLUP	2	QTN-sf0100218736	1	-28	LOC_Os01g01369	3-beta-hydroxysteroid-Delta-isomerase, putative, expressed
Grain_BLUP	2	QTN-sf0100218736	1	-23	LOC_Os01g01380	expressed protein
Grain_BLUP	2	QTN-sf0100218736	1	-18	LOC_Os01g01390	expressed protein
Grain_BLUP	2	QTN-sf0100218736	1	-12	LOC_Os01g01400	expressed protein
Grain_BLUP	2	QTN-sf0100218736	1	-10	LOC_Os01g01410	TKL_IRAK_C-LEC.1 - TKL_IRAK_C-LEC has homology to C-type lectin receptors, expressed
Grain_BLUP	2	QTN-sf0100218736	1	-5	LOC_Os01g01420	expressed protein
Grain_BLUP	2	QTN-sf0100218736	1	-2	LOC_Os01g01430	No apical meristem protein, putative, expressed
Grain_BLUP	2	QTN-sf0100218736	1	7	LOC_Os01g01450	stress responsive protein, putative, expressed
Grain_BLUP	2	QTN-sf0100218736	1	12	LOC_Os01g01460	retrotransposon protein, putative, Ty3-gypsy subclass
Grain_BLUP	2	QTN-sf0100218736	1	21	LOC_Os01g01470	no apical meristem protein, putative, expressed
Grain_BLUP	2	QTN-sf0100218736	1	28	LOC_Os01g01484	light-mediated development protein DET1, putative, expressed
Grain_BLUP	2	QTN-sf0100218736	1	39	LOC_Os01g01500	conserved hypothetical protein
Grain_BLUP	2	QTN-sf0100218736	1	41	LOC_Os01g01510	sas10/Utp3 family protein, expressed
Grain_BLUP	2	QTN-sf0100218736	1	50	LOC_Os01g01520	transferase family protein, putative, expressed
Grain_BLUP	2	QTN-sf0100218736	1	56	LOC_Os01g01530	transposon protein, putative, CACTA, En/Spm sub-class
Grain_BLUP	2	QTN-sf0100218736	1	60	LOC_Os01g01540	retrotransposon protein, putative, unclassified
Grain_BLUP	2	QTN-sf0100218736	1	61	LOC_Os01g01550	transposon protein, putative, CACTA, En/Spm sub-class
Grain_BLUP	2	QTN-sf0100218736	1	65	LOC_Os01g01560	transposon protein, putative, unclassified, expressed
Grain_BLUP	2	QTN-sf0100218736	1	68	LOC_Os01g01570	kinesin heavy chain, putative, expressed
Grain_BLUP	2	QTN-sf0100218736	1	73	LOC_Os01g01580	expressed protein
Grain_BLUP	2	QTN-sf0100218736	1	73	LOC_Os01g01590	expressed protein
Grain_BLUP	2	QTN-sf0100218736	1	83	LOC_Os01g01600	ethylene-responsive protein related, putative, expressed
Grain_BLUP	2	QTN-sf0100218736	1	87	LOC_Os01g01610	IscA-like iron-sulfur assembly protein, mitochondrial precursor, putative, expressed
Grain_BLUP	2	QTN-sf0100218736	1	89	LOC_Os01g01620	kinase, pfkB family, putative, expressed
Grain_BLUP	2	QTN-sf0100218736	1	99	LOC_Os01g01640	Rer1 protein, putative, expressed
Grain_BLUP	2	QTN-sf0100218736	1	102	LOC_Os01g01650	isoflavone reductase homolog IRL, putative, expressed
Grain_BLUP	2	QTN-sf0100218736	1	107	LOC_Os01g01660	isoflavone reductase, putative, expressed
Grain_BLUP	2	QTN-sf0100218736	1	110	LOC_Os01g01670	expressed protein
Grain_BLUP	2	QTN-sf0100218736	1	112	LOC_Os01g01680	expressed protein
Grain_env1_r1	3	QTN-sf0102352673	1	-119	LOC_Os01g04850	retrotransposon protein, putative, unclassified
Grain_env1_r1	3	QTN-sf0102352673	1	-103	LOC_Os01g04860	DUF647 domain containing protein, putative, expressed
Grain_env1_r1	3	QTN-sf0102352673	1	-98	LOC_Os01g04870	WD domain, G-beta repeat domain containing protein, expressed
Grain_env1_r1	3	QTN-sf0102352673	1	-86	LOC_Os01g04880	retrotransposon protein, putative, unclassified, expressed
Grain_env1_r1	3	QTN-sf0102352673	1	-82	LOC_Os01g04900	peptidase M50 family protein, putative, expressed
Grain_env1_r1	3	QTN-sf0102352673	1	-79	LOC_Os01g04910	TP53RK-binding protein, putative, expressed
Grain_env1_r1	3	QTN-sf0102352673	1	-74	LOC_Os01g04920	glycosyl transferase, group 1 domain containing protein, expressed
Grain_env1_r1	3	QTN-sf0102352673	1	-68	LOC_Os01g04930	MYB family transcription factor, putative, expressed
Grain_env1_r1	3	QTN-sf0102352673	1	-55	LOC_Os01g04950	peptide transporter PTR2, putative, expressed
Grain_env1_r1	3	QTN-sf0102352673	1	-48	LOC_Os01g04960	transposon protein, putative, unclassified
Grain_env1_r1	3	QTN-sf0102352673	1	-24	LOC_Os01g04970	hypothetical protein
Grain_env1_r1	3	QTN-sf0102352673	1	-13	LOC_Os01g04980	transposon protein, putative, unclassified
Grain_env1_r1	3	QTN-sf0102352673	1	0	LOC_Os01g04990	mitochondrial carrier protein, putative, expressed
Grain_env1_r1	3	QTN-sf0102352673	1	2	LOC_Os01g05000	hypothetical protein
Grain_env1_r1	3	QTN-sf0102352673	1	4	LOC_Os01g05010	mitochondrial glycoprotein, putative, expressed
Grain_env1_r1	3	QTN-sf0102352673	1	8	LOC_Os01g05020	conserved hypothetical protein
Grain_env1_r1	3	QTN-sf0102352673	1	11	LOC_Os01g05030	transposon protein, putative, unclassified
Grain_env1_r1	3	QTN-sf0102352673	1	15	LOC_Os01g05040	hypothetical protein
Grain_env1_r1	3	QTN-sf0102352673	1	18	LOC_Os01g05050	mitochondrial glycoprotein, putative
Grain_env1_r1	3	QTN-sf0102352673	1	20	LOC_Os01g05060	mitochondrial glycoprotein, putative, expressed
Grain_env1_r1	3	QTN-sf0102352673	1	23	LOC_Os01g05064	expressed protein
Grain_env1_r1	3	QTN-sf0102352673	1	25	LOC_Os01g05070	expressed protein
Grain_env1_r1	3	QTN-sf0102352673	1	29	LOC_Os01g05080	thylakoid lumenal protein, putative, expressed
Grain_env1_r1	3	QTN-sf0102352673	1	32	LOC_Os01g05090	expressed protein
Grain_env1_r1	3	QTN-sf0102352673	1	34	LOC_Os01g05100	expressed protein
Grain_env1_r1	3	QTN-sf0102352673	1	39	LOC_Os01g05105	expressed protein
Grain_env1_r1	3	QTN-sf0102352673	1	47	LOC_Os01g05120	ubiquitin fusion degradation protein, putative
Grain_env1_r1	3	QTN-sf0102352673	1	49	LOC_Os01g05130	expressed protein
Grain_env1_r1	3	QTN-sf0102352673	1	52	LOC_Os01g05140	expressed protein
Grain_env1_r1	3	QTN-sf0102352673	1	60	LOC_Os01g05150	expressed protein
Grain_env1_r1	3	QTN-sf0102352673	1	65	LOC_Os01g05160	hypothetical protein
Grain_env1_r1	3	QTN-sf0102352673	1	68	LOC_Os01g05170	expressed protein
Grain_env1_r1	3	QTN-sf0102352673	1	81	LOC_Os01g05180	expressed protein
Grain_env1_r1	3	QTN-sf0102352673	1	87	LOC_Os01g05200	retrotransposon protein, putative, Ty1-copia subclass
Grain_env1_r1	3	QTN-sf0102352673	1	95	LOC_Os01g05210	hypothetical protein
Grain_env1_r1	3	QTN-sf0102352673	1	98	LOC_Os01g05220	hypothetical protein
Grain_env1_r1	3	QTN-sf0102352673	1	104	LOC_Os01g05230	hypothetical protein
Grain_env1_r1	3	QTN-sf0102352673	1	111	LOC_Os01g05240	retrotransposon protein, putative, unclassified
Grain_env1_r1	3	QTN-sf0102352673	1	120	LOC_Os01g05250	expressed protein
Grain_env1_r2	3	QTN-sf0102873321	1	-105	LOC_Os01g05790	SLT1 protein, putative, expressed
Grain_env1_r2	3	QTN-sf0102873321	1	-99	LOC_Os01g05800	inner membrane protein, putative, expressed
Grain_env1_r2	3	QTN-sf0102873321	1	-92	LOC_Os01g05810	gamma-glutamyltranspeptidase 1 precursor, putative, expressed
Grain_env1_r2	3	QTN-sf0102873321	1	-83	LOC_Os01g05820	gamma-glutamyltranspeptidase 1 precursor, putative, expressed
Grain_env1_r2	3	QTN-sf0102873321	1	-70	LOC_Os01g05840	oxidoreductase, short chain dehydrogenase/reductase family domain containing family, expressed
Grain_env1_r2	3	QTN-sf0102873321	1	-66	LOC_Os01g05860	PPR repeat domain containing protein, putative, expressed
Grain_env1_r2	3	QTN-sf0102873321	1	-59	LOC_Os01g05870	receptor kinase, putative, expressed
Grain_env1_r2	3	QTN-sf0102873321	1	-57	LOC_Os01g05880	OsFBX1 - F-box domain containing protein, expressed
Grain_env1_r2	3	QTN-sf0102873321	1	-55	LOC_Os01g05890	OsFBX2 - F-box domain containing protein
Grain_env1_r2	3	QTN-sf0102873321	1	-117	LOC_Os01g05770	expressed protein
Grain_env1_r2	3	QTN-sf0102873321	1	-112	LOC_Os01g05780	expressed protein
Grain_env1_r2	3	QTN-sf0102873321	1	-35	LOC_Os01g05900	Core histone H2A/H2B/H3/H4 domain containing protein, putative
Grain_env1_r2	3	QTN-sf0102873321	1	-37	LOC_Os01g05940	receptor kinase, putative, expressed
Grain_env1_r2	3	QTN-sf0102873321	1	-30	LOC_Os01g05960	receptor kinase, putative, expressed
Grain_env1_r2	3	QTN-sf0102873321	1	-16	LOC_Os01g05970	OsFBO1 - F-box and other domain containing protein, expressed
Grain_env1_r2	3	QTN-sf0102873321	1	-78	LOC_Os01g05830	expressed protein
Grain_env1_r2	3	QTN-sf0102873321	1	-19	LOC_Os01g05980	receptor kinase, putative
Grain_env1_r2	3	QTN-sf0102873321	1	-69	LOC_Os01g05850	conserved hypothetical protein
Grain_env1_r2	3	QTN-sf0102873321	1	-7	LOC_Os01g06000	PPR repeat containing protein, expressed
Grain_env1_r2	3	QTN-sf0102873321	1	-1	LOC_Os01g06010	Core histone H2A/H2B/H3/H4 domain containing protein, putative, expressed
Grain_env1_r2	3	QTN-sf0102873321	1	3	LOC_Os01g06020	aspartyl-tRNA synthetase, putative, expressed
Grain_env1_r2	3	QTN-sf0102873321	1	22	LOC_Os01g06060	gibberellin receptor GID1L2, putative, expressed
Grain_env1_r2	3	QTN-sf0102873321	1	80	LOC_Os01g06210	gibberellin receptor GID1L2, putative
Grain_env1_r2	3	QTN-sf0102873321	1	82	LOC_Os01g06220	gibberellin receptor GID1L2, putative, expressed
Grain_env1_r2	3	QTN-sf0102873321	1	86	LOC_Os01g06230	OsSAUR1 - Auxin-responsive SAUR gene family member
Grain_env1_r2	3	QTN-sf0102873321	1	88	LOC_Os01g06240	protein kinase, putative, expressed
Grain_env1_r2	3	QTN-sf0102873321	1	92	LOC_Os01g06250	dirigent, putative
Grain_env1_r2	3	QTN-sf0102873321	1	108	LOC_Os01g06280	TKL_IRAK_CrRLK1L-1.4 - The CrRLK1L-1 subfamily has homology to the CrRLK1L homolog, expressed
Grain_env1_r2	3	QTN-sf0102873321	1	111	LOC_Os01g06290	splicing factor, arginine/serine-rich, putative, expressed
Grain_env1_r2	3	QTN-sf0102873321	1	11	LOC_Os01g06030	conserved hypothetical protein
Grain_env1_r2	3	QTN-sf0102873321	1	12	LOC_Os01g06040	conserved hypothetical protein
Grain_env1_r2	3	QTN-sf0102873321	1	18	LOC_Os01g06050	expressed protein
Grain_env1_r2	3	QTN-sf0102873321	1	24	LOC_Os01g06070	conserved hypothetical protein
Grain_env1_r2	3	QTN-sf0102873321	1	27	LOC_Os01g06080	conserved hypothetical protein
Grain_env1_r2	3	QTN-sf0102873321	1	32	LOC_Os01g06090	expressed protein
Grain_env1_r2	3	QTN-sf0102873321	1	35	LOC_Os01g06100	transposon protein, putative, unclassified
Grain_env1_r2	3	QTN-sf0102873321	1	38	LOC_Os01g06110	transposon protein, putative, unclassified
Grain_env1_r2	3	QTN-sf0102873321	1	46	LOC_Os01g06120	conserved hypothetical protein
Grain_env1_r2	3	QTN-sf0102873321	1	48	LOC_Os01g06130	expressed protein
Grain_env1_r2	3	QTN-sf0102873321	1	51	LOC_Os01g06140	expressed protein
Grain_env1_r2	3	QTN-sf0102873321	1	56	LOC_Os01g06150	expressed protein
Grain_env1_r2	3	QTN-sf0102873321	1	60	LOC_Os01g06160	retrotransposon protein, putative, Ty3-gypsy subclass
Grain_env1_r2	3	QTN-sf0102873321	1	67	LOC_Os01g06170	retrotransposon protein, putative, unclassified
Grain_env1_r2	3	QTN-sf0102873321	1	70	LOC_Os01g06180	retrotransposon protein, putative, unclassified
Grain_env1_r2	3	QTN-sf0102873321	1	75	LOC_Os01g06200	retrotransposon protein, putative, unclassified
Grain_env1_r2	3	QTN-sf0102873321	1	94	LOC_Os01g06260	hypothetical protein
Grain_env1_r2	3	QTN-sf0102873321	1	96	LOC_Os01g06270	expressed protein
Grain_env2_r1	3	QTN-sf0117274626	1	-113	LOC_Os01g31370	glycosyltransferase, putative, expressed
Grain_env2_r1	3	QTN-sf0117274626	1	-108	LOC_Os01g31380	retrotransposon, putative, centromere-specific
Grain_env2_r1	3	QTN-sf0117274626	1	-107	LOC_Os01g31390	retrotransposon, putative, centromere-specific
Grain_env2_r1	3	QTN-sf0117274626	1	-103	LOC_Os01g31400	retrotransposon, putative, centromere-specific
Grain_env2_r1	3	QTN-sf0117274626	1	-99	LOC_Os01g31410	retrotransposon protein, putative, unclassified
Grain_env2_r1	3	QTN-sf0117274626	1	-89	LOC_Os01g31420	retrotransposon protein, putative, Ty3-gypsy subclass
Grain_env2_r1	3	QTN-sf0117274626	1	-85	LOC_Os01g31430	retrotransposon protein, putative, Ty3-gypsy subclass
Grain_env2_r1	3	QTN-sf0117274626	1	-81	LOC_Os01g31440	retrotransposon protein, putative, unclassified
Grain_env2_r1	3	QTN-sf0117274626	1	-77	LOC_Os01g31450	retrotransposon protein, putative, unclassified, expressed
Grain_env2_r1	3	QTN-sf0117274626	1	-72	LOC_Os01g31460	retrotransposon protein, putative, unclassified
Grain_env2_r1	3	QTN-sf0117274626	1	-57	LOC_Os01g31470	mov34/MPN/PAD-1 family protein, expressed
Grain_env2_r1	3	QTN-sf0117274626	1	-50	LOC_Os01g31480	conserved hypothetical protein
Grain_env2_r1	3	QTN-sf0117274626	1	-46	LOC_Os01g31494	conserved hypothetical protein
Grain_env2_r1	3	QTN-sf0117274626	1	-38	LOC_Os01g31510	retrotransposon protein, putative, Ty1-copia subclass
Grain_env2_r1	3	QTN-sf0117274626	1	-35	LOC_Os01g31520	hypothetical protein
Grain_env2_r1	3	QTN-sf0117274626	1	-22	LOC_Os01g31540	retrotransposon protein, putative, Ty1-copia subclass
Grain_env2_r1	3	QTN-sf0117274626	1	-17	LOC_Os01g31550	retrotransposon protein, putative, Ty1-copia subclass
Grain_env2_r1	3	QTN-sf0117274626	1	-14	LOC_Os01g31560	conserved hypothetical protein
Grain_env2_r1	3	QTN-sf0117274626	1	-13	LOC_Os01g31570	hypothetical protein
Grain_env2_r1	3	QTN-sf0117274626	1	0	LOC_Os01g31580	BZIP protein, putative, expressed
Grain_env2_r1	3	QTN-sf0117274626	1	11	LOC_Os01g31590	transposon protein, putative, unclassified
Grain_env2_r1	3	QTN-sf0117274626	1	18	LOC_Os01g31600	retrotransposon protein, putative, Ty3-gypsy subclass
Grain_env2_r1	3	QTN-sf0117274626	1	26	LOC_Os01g31610	tyrosyl-tRNA synthetase, putative, expressed
Grain_env2_r1	3	QTN-sf0117274626	1	33	LOC_Os01g31629	expressed protein
Grain_env2_r1	3	QTN-sf0117274626	1	51	LOC_Os01g31650	retrotransposon protein, putative, Ty3-gypsy subclass
Grain_env2_r1	3	QTN-sf0117274626	1	54	LOC_Os01g31660	retrotransposon protein, putative, unclassified
Grain_env2_r1	3	QTN-sf0117274626	1	60	LOC_Os01g31670	retrotransposon protein, putative, unclassified
Grain_env2_r1	3	QTN-sf0117274626	1	65	LOC_Os01g31680	uncharacterized protein sll0194, putative, expressed
Grain_env2_r1	3	QTN-sf0117274626	1	73	LOC_Os01g31690	oxygen-evolving enhancer protein 1, chloroplast precursor, putative, expressed
Grain_env2_r1	3	QTN-sf0117274626	1	77	LOC_Os01g31700	hypothetical protein
Grain_env2_r1	3	QTN-sf0117274626	1	84	LOC_Os01g31714	retrotransposon protein, putative, unclassified
Grain_env2_r1	3	QTN-sf0117274626	1	87	LOC_Os01g31730	retrotransposon protein, putative, Ty3-gypsy subclass
Grain_env2_r1	3	QTN-sf0117274626	1	94	LOC_Os01g31740	retrotransposon protein, putative, unclassified
Grain_env2_r1	3	QTN-sf0117274626	1	101	LOC_Os01g31750	transposon protein, putative, unclassified
Grain_env2_r1	3	QTN-sf0117274626	1	108	LOC_Os01g31760	acyl-ACP thioesterase, putative
Grain_env2_r2	3	QTN-sf0110799569	1	-95	LOC_Os01g18940	hypothetical protein
Grain_env2_r2	3	QTN-sf0110799569	1	-84	LOC_Os01g18960	hypothetical protein
Grain_env2_r2	3	QTN-sf0110799569	1	-76	LOC_Os01g18980	transposon protein, putative, unclassified
Grain_env2_r2	3	QTN-sf0110799569	1	-66	LOC_Os01g18990	retrotransposon protein, putative, Ty3-gypsy subclass
Grain_env2_r2	3	QTN-sf0110799569	1	-61	LOC_Os01g19000	retrotransposon protein, putative, Ty3-gypsy subclass
Grain_env2_r2	3	QTN-sf0110799569	1	-57	LOC_Os01g19010	retrotransposon protein, putative, unclassified
Grain_env2_r2	3	QTN-sf0110799569	1	-38	LOC_Os01g19030	retrotransposon protein, putative, unclassified
Grain_env2_r2	3	QTN-sf0110799569	1	-28	LOC_Os01g19040	conserved hypothetical protein
Grain_env2_r2	3	QTN-sf0110799569	1	-22	LOC_Os01g19050	transposon protein, putative, unclassified
Grain_env2_r2	3	QTN-sf0110799569	1	-20	LOC_Os01g19060	transposon protein, putative, CACTA, En/Spm sub-class
Grain_env2_r2	3	QTN-sf0110799569	1	-18	LOC_Os01g19070	transposon protein, putative, CACTA, En/Spm sub-class
Grain_env2_r2	3	QTN-sf0110799569	1	-11	LOC_Os01g19090	retrotransposon protein, putative, Ty3-gypsy subclass
Grain_env2_r2	3	QTN-sf0110799569	1	-7	LOC_Os01g19100	retrotransposon protein, putative, Ty3-gypsy subclass
Grain_env2_r2	3	QTN-sf0110799569	1	-1	LOC_Os01g19110	transposon protein, putative, CACTA, En/Spm sub-class
Grain_env2_r2	3	QTN-sf0110799569	1	1	LOC_Os01g19120	expressed protein
Grain_env2_r2	3	QTN-sf0110799569	1	36	LOC_Os01g19180	hypothetical protein
Grain_env2_r2	3	QTN-sf0110799569	1	53	LOC_Os01g19190	retrotransposon protein, putative, unclassified
Grain_env2_r2	3	QTN-sf0110799569	1	59	LOC_Os01g19200	retrotransposon protein, putative, unclassified
Grain_env2_r2	3	QTN-sf0110799569	1	63	LOC_Os01g19210	transposon protein, putative, unclassified
Grain_env2_r2	3	QTN-sf0110799569	1	75	LOC_Os01g19230	conserved hypothetical protein
Grain_env2_r2	3	QTN-sf0110799569	1	85	LOC_Os01g19250	hypothetical protein
Grain_env2_r2	3	QTN-sf0110799569	1	95	LOC_Os01g19270	expressed protein
Grain_env2_r2	3	QTN-sf0110799569	1	98	LOC_Os01g19280	expressed protein
Grain_env2_r2	3	QTN-sf0110799569	1	-118	LOC_Os01g18890	peroxidase precursor, putative
Grain_env2_r2	3	QTN-sf0110799569	1	-113	LOC_Os01g18900	stigma specific peroxidase precursor, putative
Grain_env2_r2	3	QTN-sf0110799569	1	-108	LOC_Os01g18910	peroxidase precursor, putative
Grain_env2_r2	3	QTN-sf0110799569	1	-104	LOC_Os01g18920	hAT dimerisation domain-containing protein, putative
Grain_env2_r2	3	QTN-sf0110799569	1	-97	LOC_Os01g18930	peroxidase precursor, putative
Grain_env2_r2	3	QTN-sf0110799569	1	-86	LOC_Os01g18950	peroxidase precursor, putative
Grain_env2_r2	3	QTN-sf0110799569	1	-78	LOC_Os01g18970	peroxidase precursor, putative
Grain_env2_r2	3	QTN-sf0110799569	1	-50	LOC_Os01g19020	peroxidase precursor, putative, expressed
Grain_env2_r2	3	QTN-sf0110799569	1	-17	LOC_Os01g19080	ligA, putative
Grain_env2_r2	3	QTN-sf0110799569	1	4	LOC_Os01g19130	protein phosphatase 2C, putative, expressed
Grain_env2_r2	3	QTN-sf0110799569	1	13	LOC_Os01g19140	O-sialoglycoprotein endopeptidase, putative, expressed
Grain_env2_r2	3	QTN-sf0110799569	1	21	LOC_Os01g19150	CGMC_GSK.3 - CGMC includes CDA, MAPK, GSK3, and CLKC kinases, expressed
Grain_env2_r2	3	QTN-sf0110799569	1	18	LOC_Os01g19160	protein kinase domain containing protein, expressed
Grain_env2_r2	3	QTN-sf0110799569	1	29	LOC_Os01g19170	polygalacturonase, putative, expressed
Grain_env2_r2	3	QTN-sf0110799569	1	70	LOC_Os01g19220	beta-D-xylosidase, putative, expressed
Grain_env2_r2	3	QTN-sf0110799569	1	77	LOC_Os01g19240	integral membrane protein DUF6 containing protein
Grain_env2_r2	3	QTN-sf0110799569	1	91	LOC_Os01g19260	ATPase, putative, expressed
Grain_env2_r2	3	QTN-sf0110799569	1	110	LOC_Os01g19290	integral membrane protein DUF6 containing protein, expressed
Grain_BLUP	3	QTN-sf0100218839	1	-119	LOC_Os01g01210	retrotransposon protein, putative, unclassified
Grain_BLUP	3	QTN-sf0100218839	1	-113	LOC_Os01g01230	transposon protein, putative, unclassified
Grain_BLUP	3	QTN-sf0100218839	1	-104	LOC_Os01g01240	retrotransposon protein, putative, Ty3-gypsy subclass
Grain_BLUP	3	QTN-sf0100218839	1	-99	LOC_Os01g01250	transposon protein, putative, unclassified
Grain_BLUP	3	QTN-sf0100218839	1	-92	LOC_Os01g01260	transposon protein, putative, unclassified
Grain_BLUP	3	QTN-sf0100218839	1	-86	LOC_Os01g01270	retrotransposon protein, putative, unclassified
Grain_BLUP	3	QTN-sf0100218839	1	-84	LOC_Os01g01280	expressed protein
Grain_BLUP	3	QTN-sf0100218839	1	-78	LOC_Os01g01290	histone-like transcription factor and archaeal histone, putative, expressed
Grain_BLUP	3	QTN-sf0100218839	1	-75	LOC_Os01g01295	expressed protein
Grain_BLUP	3	QTN-sf0100218839	1	-71	LOC_Os01g01302	shikimate kinase, putative, expressed
Grain_BLUP	3	QTN-sf0100218839	1	-69	LOC_Os01g01307	translocon-associated protein beta domain containing protein, expressed
Grain_BLUP	3	QTN-sf0100218839	1	-63	LOC_Os01g01312	retrotransposon protein, putative, Ty1-copia subclass, expressed
Grain_BLUP	3	QTN-sf0100218839	1	-58	LOC_Os01g01320	retrotransposon protein, putative, Ty1-copia subclass
Grain_BLUP	3	QTN-sf0100218839	1	-55	LOC_Os01g01330	retrotransposon protein, putative, Ty1-copia subclass, expressed
Grain_BLUP	3	QTN-sf0100218839	1	-49	LOC_Os01g01340	light-induced protein 1-like, putative, expressed
Grain_BLUP	3	QTN-sf0100218839	1	-46	LOC_Os01g01350	SNF7 domain containing protein, putative, expressed
Grain_BLUP	3	QTN-sf0100218839	1	-39	LOC_Os01g01360	peptide transporter PTR2, putative, expressed
Grain_BLUP	3	QTN-sf0100218839	1	-28	LOC_Os01g01369	3-beta-hydroxysteroid-Delta-isomerase, putative, expressed
Grain_BLUP	3	QTN-sf0100218839	1	-23	LOC_Os01g01380	expressed protein
Grain_BLUP	3	QTN-sf0100218839	1	-19	LOC_Os01g01390	expressed protein
Grain_BLUP	3	QTN-sf0100218839	1	-13	LOC_Os01g01400	expressed protein
Grain_BLUP	3	QTN-sf0100218839	1	-10	LOC_Os01g01410	TKL_IRAK_C-LEC.1 - TKL_IRAK_C-LEC has homology to C-type lectin receptors, expressed
Grain_BLUP	3	QTN-sf0100218839	1	-5	LOC_Os01g01420	expressed protein
Grain_BLUP	3	QTN-sf0100218839	1	-2	LOC_Os01g01430	No apical meristem protein, putative, expressed
Grain_BLUP	3	QTN-sf0100218839	1	7	LOC_Os01g01450	stress responsive protein, putative, expressed
Grain_BLUP	3	QTN-sf0100218839	1	12	LOC_Os01g01460	retrotransposon protein, putative, Ty3-gypsy subclass
Grain_BLUP	3	QTN-sf0100218839	1	21	LOC_Os01g01470	no apical meristem protein, putative, expressed
Grain_BLUP	3	QTN-sf0100218839	1	28	LOC_Os01g01484	light-mediated development protein DET1, putative, expressed
Grain_BLUP	3	QTN-sf0100218839	1	39	LOC_Os01g01500	conserved hypothetical protein
Grain_BLUP	3	QTN-sf0100218839	1	41	LOC_Os01g01510	sas10/Utp3 family protein, expressed
Grain_BLUP	3	QTN-sf0100218839	1	50	LOC_Os01g01520	transferase family protein, putative, expressed
Grain_BLUP	3	QTN-sf0100218839	1	56	LOC_Os01g01530	transposon protein, putative, CACTA, En/Spm sub-class
Grain_BLUP	3	QTN-sf0100218839	1	60	LOC_Os01g01540	retrotransposon protein, putative, unclassified
Grain_BLUP	3	QTN-sf0100218839	1	61	LOC_Os01g01550	transposon protein, putative, CACTA, En/Spm sub-class
Grain_BLUP	3	QTN-sf0100218839	1	65	LOC_Os01g01560	transposon protein, putative, unclassified, expressed
Grain_BLUP	3	QTN-sf0100218839	1	68	LOC_Os01g01570	kinesin heavy chain, putative, expressed
Grain_BLUP	3	QTN-sf0100218839	1	73	LOC_Os01g01580	expressed protein
Grain_BLUP	3	QTN-sf0100218839	1	73	LOC_Os01g01590	expressed protein
Grain_BLUP	3	QTN-sf0100218839	1	83	LOC_Os01g01600	ethylene-responsive protein related, putative, expressed
Grain_BLUP	3	QTN-sf0100218839	1	87	LOC_Os01g01610	IscA-like iron-sulfur assembly protein, mitochondrial precursor, putative, expressed
Grain_BLUP	3	QTN-sf0100218839	1	89	LOC_Os01g01620	kinase, pfkB family, putative, expressed
Grain_BLUP	3	QTN-sf0100218839	1	99	LOC_Os01g01640	Rer1 protein, putative, expressed
Grain_BLUP	3	QTN-sf0100218839	1	102	LOC_Os01g01650	isoflavone reductase homolog IRL, putative, expressed
Grain_BLUP	3	QTN-sf0100218839	1	107	LOC_Os01g01660	isoflavone reductase, putative, expressed
Grain_BLUP	3	QTN-sf0100218839	1	110	LOC_Os01g01670	expressed protein
Grain_BLUP	3	QTN-sf0100218839	1	112	LOC_Os01g01680	expressed protein
Grain_env1_r1	4	QTN-sf0102342460	1	-118	LOC_Os01g04830	hypothetical protein
Grain_env1_r1	4	QTN-sf0102342460	1	-113	LOC_Os01g04840	vacuolar protein sorting-associating protein 4B, putative
Grain_env1_r1	4	QTN-sf0102342460	1	-108	LOC_Os01g04850	retrotransposon protein, putative, unclassified
Grain_env1_r1	4	QTN-sf0102342460	1	-92	LOC_Os01g04860	DUF647 domain containing protein, putative, expressed
Grain_env1_r1	4	QTN-sf0102342460	1	-88	LOC_Os01g04870	WD domain, G-beta repeat domain containing protein, expressed
Grain_env1_r1	4	QTN-sf0102342460	1	-76	LOC_Os01g04880	retrotransposon protein, putative, unclassified, expressed
Grain_env1_r1	4	QTN-sf0102342460	1	-72	LOC_Os01g04900	peptidase M50 family protein, putative, expressed
Grain_env1_r1	4	QTN-sf0102342460	1	-69	LOC_Os01g04910	TP53RK-binding protein, putative, expressed
Grain_env1_r1	4	QTN-sf0102342460	1	-64	LOC_Os01g04920	glycosyl transferase, group 1 domain containing protein, expressed
Grain_env1_r1	4	QTN-sf0102342460	1	-58	LOC_Os01g04930	MYB family transcription factor, putative, expressed
Grain_env1_r1	4	QTN-sf0102342460	1	-45	LOC_Os01g04950	peptide transporter PTR2, putative, expressed
Grain_env1_r1	4	QTN-sf0102342460	1	-38	LOC_Os01g04960	transposon protein, putative, unclassified
Grain_env1_r1	4	QTN-sf0102342460	1	-14	LOC_Os01g04970	hypothetical protein
Grain_env1_r1	4	QTN-sf0102342460	1	-3	LOC_Os01g04980	transposon protein, putative, unclassified
Grain_env1_r1	4	QTN-sf0102342460	1	6	LOC_Os01g04990	mitochondrial carrier protein, putative, expressed
Grain_env1_r1	4	QTN-sf0102342460	1	12	LOC_Os01g05000	hypothetical protein
Grain_env1_r1	4	QTN-sf0102342460	1	14	LOC_Os01g05010	mitochondrial glycoprotein, putative, expressed
Grain_env1_r1	4	QTN-sf0102342460	1	18	LOC_Os01g05020	conserved hypothetical protein
Grain_env1_r1	4	QTN-sf0102342460	1	21	LOC_Os01g05030	transposon protein, putative, unclassified
Grain_env1_r1	4	QTN-sf0102342460	1	26	LOC_Os01g05040	hypothetical protein
Grain_env1_r1	4	QTN-sf0102342460	1	28	LOC_Os01g05050	mitochondrial glycoprotein, putative
Grain_env1_r1	4	QTN-sf0102342460	1	31	LOC_Os01g05060	mitochondrial glycoprotein, putative, expressed
Grain_env1_r1	4	QTN-sf0102342460	1	33	LOC_Os01g05064	expressed protein
Grain_env1_r1	4	QTN-sf0102342460	1	35	LOC_Os01g05070	expressed protein
Grain_env1_r1	4	QTN-sf0102342460	1	40	LOC_Os01g05080	thylakoid lumenal protein, putative, expressed
Grain_env1_r1	4	QTN-sf0102342460	1	42	LOC_Os01g05090	expressed protein
Grain_env1_r1	4	QTN-sf0102342460	1	44	LOC_Os01g05100	expressed protein
Grain_env1_r1	4	QTN-sf0102342460	1	50	LOC_Os01g05105	expressed protein
Grain_env1_r1	4	QTN-sf0102342460	1	57	LOC_Os01g05120	ubiquitin fusion degradation protein, putative
Grain_env1_r1	4	QTN-sf0102342460	1	59	LOC_Os01g05130	expressed protein
Grain_env1_r1	4	QTN-sf0102342460	1	62	LOC_Os01g05140	expressed protein
Grain_env1_r1	4	QTN-sf0102342460	1	70	LOC_Os01g05150	expressed protein
Grain_env1_r1	4	QTN-sf0102342460	1	76	LOC_Os01g05160	hypothetical protein
Grain_env1_r1	4	QTN-sf0102342460	1	78	LOC_Os01g05170	expressed protein
Grain_env1_r1	4	QTN-sf0102342460	1	91	LOC_Os01g05180	expressed protein
Grain_env1_r1	4	QTN-sf0102342460	1	97	LOC_Os01g05200	retrotransposon protein, putative, Ty1-copia subclass
Grain_env1_r1	4	QTN-sf0102342460	1	105	LOC_Os01g05210	hypothetical protein
Grain_env1_r1	4	QTN-sf0102342460	1	109	LOC_Os01g05220	hypothetical protein
Grain_env1_r1	4	QTN-sf0102342460	1	114	LOC_Os01g05230	hypothetical protein
Grain_env1_r2	4	QTN-sf0102342460	1	-113	LOC_Os01g04840	vacuolar protein sorting-associating protein 4B, putative
Grain_env1_r2	4	QTN-sf0102342460	1	-92	LOC_Os01g04860	DUF647 domain containing protein, putative, expressed
Grain_env1_r2	4	QTN-sf0102342460	1	-88	LOC_Os01g04870	WD domain, G-beta repeat domain containing protein, expressed
Grain_env1_r2	4	QTN-sf0102342460	1	-72	LOC_Os01g04900	peptidase M50 family protein, putative, expressed
Grain_env1_r2	4	QTN-sf0102342460	1	-69	LOC_Os01g04910	TP53RK-binding protein, putative, expressed
Grain_env1_r2	4	QTN-sf0102342460	1	-64	LOC_Os01g04920	glycosyl transferase, group 1 domain containing protein, expressed
Grain_env1_r2	4	QTN-sf0102342460	1	-58	LOC_Os01g04930	MYB family transcription factor, putative, expressed
Grain_env1_r2	4	QTN-sf0102342460	1	-45	LOC_Os01g04950	peptide transporter PTR2, putative, expressed
Grain_env1_r2	4	QTN-sf0102342460	1	6	LOC_Os01g04990	mitochondrial carrier protein, putative, expressed
Grain_env1_r2	4	QTN-sf0102342460	1	14	LOC_Os01g05010	mitochondrial glycoprotein, putative, expressed
Grain_env1_r2	4	QTN-sf0102342460	1	28	LOC_Os01g05050	mitochondrial glycoprotein, putative
Grain_env1_r2	4	QTN-sf0102342460	1	31	LOC_Os01g05060	mitochondrial glycoprotein, putative, expressed
Grain_env1_r2	4	QTN-sf0102342460	1	40	LOC_Os01g05080	thylakoid lumenal protein, putative, expressed
Grain_env1_r2	4	QTN-sf0102342460	1	57	LOC_Os01g05120	ubiquitin fusion degradation protein, putative
Grain_env1_r2	4	QTN-sf0102342460	1	-118	LOC_Os01g04830	hypothetical protein
Grain_env1_r2	4	QTN-sf0102342460	1	-108	LOC_Os01g04850	retrotransposon protein, putative, unclassified
Grain_env1_r2	4	QTN-sf0102342460	1	-76	LOC_Os01g04880	retrotransposon protein, putative, unclassified, expressed
Grain_env1_r2	4	QTN-sf0102342460	1	-38	LOC_Os01g04960	transposon protein, putative, unclassified
Grain_env1_r2	4	QTN-sf0102342460	1	-14	LOC_Os01g04970	hypothetical protein
Grain_env1_r2	4	QTN-sf0102342460	1	-3	LOC_Os01g04980	transposon protein, putative, unclassified
Grain_env1_r2	4	QTN-sf0102342460	1	12	LOC_Os01g05000	hypothetical protein
Grain_env1_r2	4	QTN-sf0102342460	1	18	LOC_Os01g05020	conserved hypothetical protein
Grain_env1_r2	4	QTN-sf0102342460	1	21	LOC_Os01g05030	transposon protein, putative, unclassified
Grain_env1_r2	4	QTN-sf0102342460	1	26	LOC_Os01g05040	hypothetical protein
Grain_env1_r2	4	QTN-sf0102342460	1	33	LOC_Os01g05064	expressed protein
Grain_env1_r2	4	QTN-sf0102342460	1	35	LOC_Os01g05070	expressed protein
Grain_env1_r2	4	QTN-sf0102342460	1	42	LOC_Os01g05090	expressed protein
Grain_env1_r2	4	QTN-sf0102342460	1	44	LOC_Os01g05100	expressed protein
Grain_env1_r2	4	QTN-sf0102342460	1	50	LOC_Os01g05105	expressed protein
Grain_env1_r2	4	QTN-sf0102342460	1	59	LOC_Os01g05130	expressed protein
Grain_env1_r2	4	QTN-sf0102342460	1	62	LOC_Os01g05140	expressed protein
Grain_env1_r2	4	QTN-sf0102342460	1	70	LOC_Os01g05150	expressed protein
Grain_env1_r2	4	QTN-sf0102342460	1	76	LOC_Os01g05160	hypothetical protein
Grain_env1_r2	4	QTN-sf0102342460	1	78	LOC_Os01g05170	expressed protein
Grain_env1_r2	4	QTN-sf0102342460	1	91	LOC_Os01g05180	expressed protein
Grain_env1_r2	4	QTN-sf0102342460	1	97	LOC_Os01g05200	retrotransposon protein, putative, Ty1-copia subclass
Grain_env1_r2	4	QTN-sf0102342460	1	105	LOC_Os01g05210	hypothetical protein
Grain_env1_r2	4	QTN-sf0102342460	1	109	LOC_Os01g05220	hypothetical protein
Grain_env1_r2	4	QTN-sf0102342460	1	114	LOC_Os01g05230	hypothetical protein
Grain_env2_r1	4	QTN-sf0208387533	2	-117	LOC_Os02g14870	conserved hypothetical protein
Grain_env2_r1	4	QTN-sf0208387533	2	-109	LOC_Os02g14874	expressed protein
Grain_env2_r1	4	QTN-sf0208387533	2	-97	LOC_Os02g14880	hypothetical protein
Grain_env2_r1	4	QTN-sf0208387533	2	-94	LOC_Os02g14890	expressed protein
Grain_env2_r1	4	QTN-sf0208387533	2	-35	LOC_Os02g14970	hypothetical protein
Grain_env2_r1	4	QTN-sf0208387533	2	0	LOC_Os02g15030	hypothetical protein
Grain_env2_r1	4	QTN-sf0208387533	2	3	LOC_Os02g15040	hypothetical protein
Grain_env2_r1	4	QTN-sf0208387533	2	6	LOC_Os02g15050	hypothetical protein
Grain_env2_r1	4	QTN-sf0208387533	2	41	LOC_Os02g15130	hypothetical protein
Grain_env2_r1	4	QTN-sf0208387533	2	45	LOC_Os02g15140	retrotransposon protein, putative, unclassified, expressed
Grain_env2_r1	4	QTN-sf0208387533	2	82	LOC_Os02g15190	retrotransposon protein, putative, unclassified
Grain_env2_r1	4	QTN-sf0208387533	2	91	LOC_Os02g15200	hypothetical protein
Grain_env2_r1	4	QTN-sf0208387533	2	93	LOC_Os02g15210	hypothetical protein
Grain_env2_r1	4	QTN-sf0208387533	2	-70	LOC_Os02g14900	1,3-beta-glucan synthase component domain containing protein, expressed
Grain_env2_r1	4	QTN-sf0208387533	2	-61	LOC_Os02g14910	bZIP transcription factor family protein, putative, expressed
Grain_env2_r1	4	QTN-sf0208387533	2	-44	LOC_Os02g14929	T-complex protein, putative, expressed
Grain_env2_r1	4	QTN-sf0208387533	2	-24	LOC_Os02g14980	calcium-binding EF hand family protein, putative, expressed
Grain_env2_r1	4	QTN-sf0208387533	2	-23	LOC_Os02g14990	zinc finger, C3HC4 type domain containing protein, expressed
Grain_env2_r1	4	QTN-sf0208387533	2	-19	LOC_Os02g15000	zinc finger, C3HC4 type domain containing protein, expressed
Grain_env2_r1	4	QTN-sf0208387533	2	-11	LOC_Os02g15010	zinc finger, C3HC4 type domain containing protein, expressed
Grain_env2_r1	4	QTN-sf0208387533	2	-6	LOC_Os02g15020	zinc finger, C3HC4 type domain containing protein
Grain_env2_r1	4	QTN-sf0208387533	2	9	LOC_Os02g15060	zinc finger, C3HC4 type domain containing protein
Grain_env2_r1	4	QTN-sf0208387533	2	13	LOC_Os02g15070	glutelin, putative, expressed
Grain_env2_r1	4	QTN-sf0208387533	2	17	LOC_Os02g15080	zinc finger, C3HC4 type domain containing protein, expressed
Grain_env2_r1	4	QTN-sf0208387533	2	19	LOC_Os02g15090	glutelin, putative, expressed
Grain_env2_r1	4	QTN-sf0208387533	2	23	LOC_Os02g15100	zinc finger, C3HC4 type domain containing protein, expressed
Grain_env2_r1	4	QTN-sf0208387533	2	29	LOC_Os02g15110	zinc finger, C3HC4 type domain containing protein, expressed
Grain_env2_r1	4	QTN-sf0208387533	2	35	LOC_Os02g15120	RING-H2 finger protein, putative, expressed
Grain_env2_r1	4	QTN-sf0208387533	2	59	LOC_Os02g15150	glutelin, putative, expressed
Grain_env2_r1	4	QTN-sf0208387533	2	66	LOC_Os02g15160	OsFBX40 - F-box domain containing protein, expressed
Grain_env2_r1	4	QTN-sf0208387533	2	71	LOC_Os02g15169	glutelin, putative, expressed
Grain_env2_r1	4	QTN-sf0208387533	2	77	LOC_Os02g15178	glutelin, putative, expressed
Grain_env2_r1	4	QTN-sf0208387533	2	102	LOC_Os02g15220	bromodomain containing protein, expressed
Grain_env2_r1	4	QTN-sf0208387533	2	113	LOC_Os02g15230	GDSL-like lipase/acylhydrolase, putative, expressed
Grain_env2_r2	4	QTN-sf0100905424	1	-117	LOC_Os01g02430	TAK14, putative, expressed
Grain_env2_r2	4	QTN-sf0100905424	1	-114	LOC_Os01g02440	Ser/Thr receptor-like kinase, putative, expressed
Grain_env2_r2	4	QTN-sf0100905424	1	-111	LOC_Os01g02460	receptor kinase LRK10, putative
Grain_env2_r2	4	QTN-sf0100905424	1	-96	LOC_Os01g02500	glutamyl-tRNA amidotransferase, putative
Grain_env2_r2	4	QTN-sf0100905424	1	-63	LOC_Os01g02550	protein kinase domain containing protein, expressed
Grain_env2_r2	4	QTN-sf0100905424	1	-58	LOC_Os01g02560	Ser/Thr receptor-like kinase, putative, expressed
Grain_env2_r2	4	QTN-sf0100905424	1	-51	LOC_Os01g02570	protein kinase domain containing protein, expressed
Grain_env2_r2	4	QTN-sf0100905424	1	-45	LOC_Os01g02580	protein kinase domain containing protein
Grain_env2_r2	4	QTN-sf0100905424	1	-41	LOC_Os01g02590	receptor-like kinase, putative, expressed
Grain_env2_r2	4	QTN-sf0100905424	1	-37	LOC_Os01g02600	Ser/Thr receptor-like kinase, putative, expressed
Grain_env2_r2	4	QTN-sf0100905424	1	-31	LOC_Os01g02610	protein kinase domain containing protein
Grain_env2_r2	4	QTN-sf0100905424	1	5	LOC_Os01g02680	protein kinase domain containing protein, expressed
Grain_env2_r2	4	QTN-sf0100905424	1	9	LOC_Os01g02690	resistance-related receptor-like kinase, putative
Grain_env2_r2	4	QTN-sf0100905424	1	14	LOC_Os01g02700	protein kinase domain containing protein, expressed
Grain_env2_r2	4	QTN-sf0100905424	1	18	LOC_Os01g02710	LRk-type protein, putative
Grain_env2_r2	4	QTN-sf0100905424	1	23	LOC_Os01g02720	elongation factor Tu, putative, expressed
Grain_env2_r2	4	QTN-sf0100905424	1	29	LOC_Os01g02730	TAK14, putative, expressed
Grain_env2_r2	4	QTN-sf0100905424	1	47	LOC_Os01g02750	protein kinase domain containing protein, expressed
Grain_env2_r2	4	QTN-sf0100905424	1	51	LOC_Os01g02760	receptor-like kinase, putative, expressed
Grain_env2_r2	4	QTN-sf0100905424	1	55	LOC_Os01g02770	resistance-related receptor-like kinase, putative, expressed
Grain_env2_r2	4	QTN-sf0100905424	1	62	LOC_Os01g02780	TAK33, putative, expressed
Grain_env2_r2	4	QTN-sf0100905424	1	70	LOC_Os01g02790	protein kinase domain containing protein, expressed
Grain_env2_r2	4	QTN-sf0100905424	1	77	LOC_Os01g02800	receptor-like kinase ARK1AS, putative, expressed
Grain_env2_r2	4	QTN-sf0100905424	1	81	LOC_Os01g02810	resistance-related receptor-like kinase, putative
Grain_env2_r2	4	QTN-sf0100905424	1	88	LOC_Os01g02830	receptor-like kinase ARK1AS, putative, expressed
Grain_env2_r2	4	QTN-sf0100905424	1	91	LOC_Os01g02840	resistance-related receptor-like kinase, putative
Grain_env2_r2	4	QTN-sf0100905424	1	103	LOC_Os01g02870	auxin-induced protein 5NG4, putative, expressed
Grain_env2_r2	4	QTN-sf0100905424	1	109	LOC_Os01g02880	fructose-bisphospate aldolase isozyme, putative, expressed
Grain_env2_r2	4	QTN-sf0100905424	1	-112	LOC_Os01g02450	retrotransposon protein, putative, unclassified
Grain_env2_r2	4	QTN-sf0100905424	1	-108	LOC_Os01g02470	conserved hypothetical protein
Grain_env2_r2	4	QTN-sf0100905424	1	-104	LOC_Os01g02480	retrotransposon protein, putative, unclassified
Grain_env2_r2	4	QTN-sf0100905424	1	-99	LOC_Os01g02490	expressed protein
Grain_env2_r2	4	QTN-sf0100905424	1	-88	LOC_Os01g02510	retrotransposon protein, putative, unclassified, expressed
Grain_env2_r2	4	QTN-sf0100905424	1	-82	LOC_Os01g02520	retrotransposon protein, putative, unclassified
Grain_env2_r2	4	QTN-sf0100905424	1	-75	LOC_Os01g02530	retrotransposon protein, putative, unclassified, expressed
Grain_env2_r2	4	QTN-sf0100905424	1	-67	LOC_Os01g02540	retrotransposon protein, putative, unclassified
Grain_env2_r2	4	QTN-sf0100905424	1	-18	LOC_Os01g02629	retrotransposon protein, putative, unclassified
Grain_env2_r2	4	QTN-sf0100905424	1	-8	LOC_Os01g02650	retrotransposon protein, putative, unclassified
Grain_env2_r2	4	QTN-sf0100905424	1	-4	LOC_Os01g02660	retrotransposon protein, putative, unclassified
Grain_env2_r2	4	QTN-sf0100905424	1	33	LOC_Os01g02740	retrotransposon protein, putative, unclassified
Grain_env2_r2	4	QTN-sf0100905424	1	94	LOC_Os01g02850	hypothetical protein
Grain_env2_r2	4	QTN-sf0100905424	1	96	LOC_Os01g02860	expressed protein
Grain_BLUP	4	QTN-sf0100267400	1	-117	LOC_Os01g01307	translocon-associated protein beta domain containing protein, expressed
Grain_BLUP	4	QTN-sf0100267400	1	-111	LOC_Os01g01312	retrotransposon protein, putative, Ty1-copia subclass, expressed
Grain_BLUP	4	QTN-sf0100267400	1	-107	LOC_Os01g01320	retrotransposon protein, putative, Ty1-copia subclass
Grain_BLUP	4	QTN-sf0100267400	1	-104	LOC_Os01g01330	retrotransposon protein, putative, Ty1-copia subclass, expressed
Grain_BLUP	4	QTN-sf0100267400	1	-98	LOC_Os01g01340	light-induced protein 1-like, putative, expressed
Grain_BLUP	4	QTN-sf0100267400	1	-94	LOC_Os01g01350	SNF7 domain containing protein, putative, expressed
Grain_BLUP	4	QTN-sf0100267400	1	-87	LOC_Os01g01360	peptide transporter PTR2, putative, expressed
Grain_BLUP	4	QTN-sf0100267400	1	-77	LOC_Os01g01369	3-beta-hydroxysteroid-Delta-isomerase, putative, expressed
Grain_BLUP	4	QTN-sf0100267400	1	-72	LOC_Os01g01380	expressed protein
Grain_BLUP	4	QTN-sf0100267400	1	-67	LOC_Os01g01390	expressed protein
Grain_BLUP	4	QTN-sf0100267400	1	-61	LOC_Os01g01400	expressed protein
Grain_BLUP	4	QTN-sf0100267400	1	-58	LOC_Os01g01410	TKL_IRAK_C-LEC.1 - TKL_IRAK_C-LEC has homology to C-type lectin receptors, expressed
Grain_BLUP	4	QTN-sf0100267400	1	-54	LOC_Os01g01420	expressed protein
Grain_BLUP	4	QTN-sf0100267400	1	-50	LOC_Os01g01430	No apical meristem protein, putative, expressed
Grain_BLUP	4	QTN-sf0100267400	1	-47	LOC_Os01g01440	conserved hypothetical protein
Grain_BLUP	4	QTN-sf0100267400	1	-39	LOC_Os01g01450	stress responsive protein, putative, expressed
Grain_BLUP	4	QTN-sf0100267400	1	-35	LOC_Os01g01460	retrotransposon protein, putative, Ty3-gypsy subclass
Grain_BLUP	4	QTN-sf0100267400	1	-24	LOC_Os01g01470	no apical meristem protein, putative, expressed
Grain_BLUP	4	QTN-sf0100267400	1	-11	LOC_Os01g01484	light-mediated development protein DET1, putative, expressed
Grain_BLUP	4	QTN-sf0100267400	1	-8	LOC_Os01g01500	conserved hypothetical protein
Grain_BLUP	4	QTN-sf0100267400	1	1	LOC_Os01g01520	transferase family protein, putative, expressed
Grain_BLUP	4	QTN-sf0100267400	1	7	LOC_Os01g01530	transposon protein, putative, CACTA, En/Spm sub-class
Grain_BLUP	4	QTN-sf0100267400	1	11	LOC_Os01g01540	retrotransposon protein, putative, unclassified
Grain_BLUP	4	QTN-sf0100267400	1	12	LOC_Os01g01550	transposon protein, putative, CACTA, En/Spm sub-class
Grain_BLUP	4	QTN-sf0100267400	1	16	LOC_Os01g01560	transposon protein, putative, unclassified, expressed
Grain_BLUP	4	QTN-sf0100267400	1	19	LOC_Os01g01570	kinesin heavy chain, putative, expressed
Grain_BLUP	4	QTN-sf0100267400	1	24	LOC_Os01g01580	expressed protein
Grain_BLUP	4	QTN-sf0100267400	1	25	LOC_Os01g01590	expressed protein
Grain_BLUP	4	QTN-sf0100267400	1	34	LOC_Os01g01600	ethylene-responsive protein related, putative, expressed
Grain_BLUP	4	QTN-sf0100267400	1	38	LOC_Os01g01610	IscA-like iron-sulfur assembly protein, mitochondrial precursor, putative, expressed
Grain_BLUP	4	QTN-sf0100267400	1	41	LOC_Os01g01620	kinase, pfkB family, putative, expressed
Grain_BLUP	4	QTN-sf0100267400	1	51	LOC_Os01g01640	Rer1 protein, putative, expressed
Grain_BLUP	4	QTN-sf0100267400	1	54	LOC_Os01g01650	isoflavone reductase homolog IRL, putative, expressed
Grain_BLUP	4	QTN-sf0100267400	1	58	LOC_Os01g01660	isoflavone reductase, putative, expressed
Grain_BLUP	4	QTN-sf0100267400	1	61	LOC_Os01g01670	expressed protein
Grain_BLUP	4	QTN-sf0100267400	1	64	LOC_Os01g01680	expressed protein
Grain_BLUP	4	QTN-sf0100267400	1	67	LOC_Os01g01689	phosphatidylinositol 3- and 4-kinase family protein, expressed
Grain_BLUP	4	QTN-sf0100267400	1	103	LOC_Os01g01700	anaphase-promoting complex subunit 11, putative, expressed
Grain_BLUP	4	QTN-sf0100267400	1	106	LOC_Os01g01710	1-deoxy-D-xylulose 5-phosphate reductoisomerase, chloroplast precursor, putative, expressed
Grain_BLUP	4	QTN-sf0100267400	1	114	LOC_Os01g01720	pex14, putative, expressed
Grain_env1_r1	5	QTN-sf0102259021	1	-117	LOC_Os01g04740	hypothetical protein
Grain_env1_r1	5	QTN-sf0102259021	1	-104	LOC_Os01g04750	B3 DNA binding domain containing protein, expressed
Grain_env1_r1	5	QTN-sf0102259021	1	-97	LOC_Os01g04760	hypothetical protein
Grain_env1_r1	5	QTN-sf0102259021	1	-77	LOC_Os01g04770	retrotransposon protein, putative, unclassified
Grain_env1_r1	5	QTN-sf0102259021	1	-68	LOC_Os01g04780	retrotransposon protein, putative, unclassified
Grain_env1_r1	5	QTN-sf0102259021	1	-61	LOC_Os01g04790	retrotransposon protein, putative, unclassified
Grain_env1_r1	5	QTN-sf0102259021	1	-56	LOC_Os01g04800	B3 DNA binding domain containing protein, expressed
Grain_env1_r1	5	QTN-sf0102259021	1	-37	LOC_Os01g04814	vacuolar protein sorting-associating protein 4B, putative, expressed
Grain_env1_r1	5	QTN-sf0102259021	1	-34	LOC_Os01g04830	hypothetical protein
Grain_env1_r1	5	QTN-sf0102259021	1	-30	LOC_Os01g04840	vacuolar protein sorting-associating protein 4B, putative
Grain_env1_r1	5	QTN-sf0102259021	1	-25	LOC_Os01g04850	retrotransposon protein, putative, unclassified
Grain_env1_r1	5	QTN-sf0102259021	1	-9	LOC_Os01g04860	DUF647 domain containing protein, putative, expressed
Grain_env1_r1	5	QTN-sf0102259021	1	-4	LOC_Os01g04870	WD domain, G-beta repeat domain containing protein, expressed
Grain_env1_r1	5	QTN-sf0102259021	1	1	LOC_Os01g04880	retrotransposon protein, putative, unclassified, expressed
Grain_env1_r1	5	QTN-sf0102259021	1	5	LOC_Os01g04900	peptidase M50 family protein, putative, expressed
Grain_env1_r1	5	QTN-sf0102259021	1	11	LOC_Os01g04910	TP53RK-binding protein, putative, expressed
Grain_env1_r1	5	QTN-sf0102259021	1	15	LOC_Os01g04920	glycosyl transferase, group 1 domain containing protein, expressed
Grain_env1_r1	5	QTN-sf0102259021	1	21	LOC_Os01g04930	MYB family transcription factor, putative, expressed
Grain_env1_r1	5	QTN-sf0102259021	1	32	LOC_Os01g04950	peptide transporter PTR2, putative, expressed
Grain_env1_r1	5	QTN-sf0102259021	1	39	LOC_Os01g04960	transposon protein, putative, unclassified
Grain_env1_r1	5	QTN-sf0102259021	1	68	LOC_Os01g04970	hypothetical protein
Grain_env1_r1	5	QTN-sf0102259021	1	76	LOC_Os01g04980	transposon protein, putative, unclassified
Grain_env1_r1	5	QTN-sf0102259021	1	89	LOC_Os01g04990	mitochondrial carrier protein, putative, expressed
Grain_env1_r1	5	QTN-sf0102259021	1	96	LOC_Os01g05000	hypothetical protein
Grain_env1_r1	5	QTN-sf0102259021	1	97	LOC_Os01g05010	mitochondrial glycoprotein, putative, expressed
Grain_env1_r1	5	QTN-sf0102259021	1	101	LOC_Os01g05020	conserved hypothetical protein
Grain_env1_r1	5	QTN-sf0102259021	1	104	LOC_Os01g05030	transposon protein, putative, unclassified
Grain_env1_r1	5	QTN-sf0102259021	1	109	LOC_Os01g05040	hypothetical protein
Grain_env1_r1	5	QTN-sf0102259021	1	112	LOC_Os01g05050	mitochondrial glycoprotein, putative
Grain_env1_r1	5	QTN-sf0102259021	1	114	LOC_Os01g05060	mitochondrial glycoprotein, putative, expressed
Grain_env1_r1	5	QTN-sf0102259021	1	117	LOC_Os01g05064	expressed protein
Grain_env1_r2	5	QTN-sf0208267677	2	-115	LOC_Os02g14740	hypothetical protein
Grain_env1_r2	5	QTN-sf0208267677	2	-108	LOC_Os02g14750	hypothetical protein
Grain_env1_r2	5	QTN-sf0208267677	2	-98	LOC_Os02g14760	CID11, putative, expressed
Grain_env1_r2	5	QTN-sf0208267677	2	-83	LOC_Os02g14770	phosphoenolpyruvate carboxylase, putative, expressed
Grain_env1_r2	5	QTN-sf0208267677	2	-67	LOC_Os02g14780	splicing factor 3 subunit 1, putative, expressed
Grain_env1_r2	5	QTN-sf0208267677	2	-61	LOC_Os02g14790	WD domain, G-beta repeat domain containing protein, expressed
Grain_env1_r2	5	QTN-sf0208267677	2	-44	LOC_Os02g14800	expressed protein
Grain_env1_r2	5	QTN-sf0208267677	2	-37	LOC_Os02g14810	conserved hypothetical protein
Grain_env1_r2	5	QTN-sf0208267677	2	-33	LOC_Os02g14820	hypothetical protein
Grain_env1_r2	5	QTN-sf0208267677	2	-24	LOC_Os02g14830	hypothetical protein
Grain_env1_r2	5	QTN-sf0208267677	2	-19	LOC_Os02g14840	potassium channel KAT1, putative, expressed
Grain_env1_r2	5	QTN-sf0208267677	2	-10	LOC_Os02g14850	expressed protein
Grain_env1_r2	5	QTN-sf0208267677	2	-5	LOC_Os02g14855	conserved hypothetical protein
Grain_env1_r2	5	QTN-sf0208267677	2	-1	LOC_Os02g14860	prefoldin subunit, putative, expressed
Grain_env1_r2	5	QTN-sf0208267677	2	0	LOC_Os02g14870	conserved hypothetical protein
Grain_env1_r2	5	QTN-sf0208267677	2	9	LOC_Os02g14874	expressed protein
Grain_env1_r2	5	QTN-sf0208267677	2	21	LOC_Os02g14880	hypothetical protein
Grain_env1_r2	5	QTN-sf0208267677	2	24	LOC_Os02g14890	expressed protein
Grain_env1_r2	5	QTN-sf0208267677	2	32	LOC_Os02g14900	1,3-beta-glucan synthase component domain containing protein, expressed
Grain_env1_r2	5	QTN-sf0208267677	2	56	LOC_Os02g14910	bZIP transcription factor family protein, putative, expressed
Grain_env1_r2	5	QTN-sf0208267677	2	82	LOC_Os02g14970	hypothetical protein
Grain_env1_r2	5	QTN-sf0208267677	2	58	LOC_Os02g14929	T-complex protein, putative, expressed
Grain_env1_r2	5	QTN-sf0208267677	2	91	LOC_Os02g14980	calcium-binding EF hand family protein, putative, expressed
Grain_env1_r2	5	QTN-sf0208267677	2	118	LOC_Os02g15030	hypothetical protein
Grain_env1_r2	5	QTN-sf0208267677	2	95	LOC_Os02g14990	zinc finger, C3HC4 type domain containing protein, expressed
Grain_env1_r2	5	QTN-sf0208267677	2	99	LOC_Os02g15000	zinc finger, C3HC4 type domain containing protein, expressed
Grain_env1_r2	5	QTN-sf0208267677	2	107	LOC_Os02g15010	zinc finger, C3HC4 type domain containing protein, expressed
Grain_env1_r2	5	QTN-sf0208267677	2	112	LOC_Os02g15020	zinc finger, C3HC4 type domain containing protein
Grain_env2_r1	5	QTN-sf0208387536	2	-117	LOC_Os02g14870	conserved hypothetical protein
Grain_env2_r1	5	QTN-sf0208387536	2	-109	LOC_Os02g14874	expressed protein
Grain_env2_r1	5	QTN-sf0208387536	2	-97	LOC_Os02g14880	hypothetical protein
Grain_env2_r1	5	QTN-sf0208387536	2	-94	LOC_Os02g14890	expressed protein
Grain_env2_r1	5	QTN-sf0208387536	2	-35	LOC_Os02g14970	hypothetical protein
Grain_env2_r1	5	QTN-sf0208387536	2	-70	LOC_Os02g14900	1,3-beta-glucan synthase component domain containing protein, expressed
Grain_env2_r1	5	QTN-sf0208387536	2	0	LOC_Os02g15030	hypothetical protein
Grain_env2_r1	5	QTN-sf0208387536	2	3	LOC_Os02g15040	hypothetical protein
Grain_env2_r1	5	QTN-sf0208387536	2	6	LOC_Os02g15050	hypothetical protein
Grain_env2_r1	5	QTN-sf0208387536	2	41	LOC_Os02g15130	hypothetical protein
Grain_env2_r1	5	QTN-sf0208387536	2	45	LOC_Os02g15140	retrotransposon protein, putative, unclassified, expressed
Grain_env2_r1	5	QTN-sf0208387536	2	82	LOC_Os02g15190	retrotransposon protein, putative, unclassified
Grain_env2_r1	5	QTN-sf0208387536	2	91	LOC_Os02g15200	hypothetical protein
Grain_env2_r1	5	QTN-sf0208387536	2	93	LOC_Os02g15210	hypothetical protein
Grain_env2_r1	5	QTN-sf0208387536	2	-61	LOC_Os02g14910	bZIP transcription factor family protein, putative, expressed
Grain_env2_r1	5	QTN-sf0208387536	2	-44	LOC_Os02g14929	T-complex protein, putative, expressed
Grain_env2_r1	5	QTN-sf0208387536	2	-24	LOC_Os02g14980	calcium-binding EF hand family protein, putative, expressed
Grain_env2_r1	5	QTN-sf0208387536	2	-23	LOC_Os02g14990	zinc finger, C3HC4 type domain containing protein, expressed
Grain_env2_r1	5	QTN-sf0208387536	2	-19	LOC_Os02g15000	zinc finger, C3HC4 type domain containing protein, expressed
Grain_env2_r1	5	QTN-sf0208387536	2	-11	LOC_Os02g15010	zinc finger, C3HC4 type domain containing protein, expressed
Grain_env2_r1	5	QTN-sf0208387536	2	-6	LOC_Os02g15020	zinc finger, C3HC4 type domain containing protein
Grain_env2_r1	5	QTN-sf0208387536	2	9	LOC_Os02g15060	zinc finger, C3HC4 type domain containing protein
Grain_env2_r1	5	QTN-sf0208387536	2	13	LOC_Os02g15070	glutelin, putative, expressed
Grain_env2_r1	5	QTN-sf0208387536	2	17	LOC_Os02g15080	zinc finger, C3HC4 type domain containing protein, expressed
Grain_env2_r1	5	QTN-sf0208387536	2	19	LOC_Os02g15090	glutelin, putative, expressed
Grain_env2_r1	5	QTN-sf0208387536	2	23	LOC_Os02g15100	zinc finger, C3HC4 type domain containing protein, expressed
Grain_env2_r1	5	QTN-sf0208387536	2	29	LOC_Os02g15110	zinc finger, C3HC4 type domain containing protein, expressed
Grain_env2_r1	5	QTN-sf0208387536	2	35	LOC_Os02g15120	RING-H2 finger protein, putative, expressed
Grain_env2_r1	5	QTN-sf0208387536	2	59	LOC_Os02g15150	glutelin, putative, expressed
Grain_env2_r1	5	QTN-sf0208387536	2	66	LOC_Os02g15160	OsFBX40 - F-box domain containing protein, expressed
Grain_env2_r1	5	QTN-sf0208387536	2	71	LOC_Os02g15169	glutelin, putative, expressed
Grain_env2_r1	5	QTN-sf0208387536	2	77	LOC_Os02g15178	glutelin, putative, expressed
Grain_env2_r1	5	QTN-sf0208387536	2	102	LOC_Os02g15220	bromodomain containing protein, expressed
Grain_env2_r1	5	QTN-sf0208387536	2	113	LOC_Os02g15230	GDSL-like lipase/acylhydrolase, putative, expressed
Grain_env2_r2	5	QTN-sf0102534860	1	24	LOC_Os01g05420	IWS1 C-terminus family protein, putative, expressed
Grain_env2_r2	5	QTN-sf0102534860	1	32	LOC_Os01g05430	OsRhmbd1 - Putative Rhomboid homologue, expressed
Grain_env2_r2	5	QTN-sf0102534860	1	34	LOC_Os01g05440	XH domain containing protein, expressed
Grain_env2_r2	5	QTN-sf0102534860	1	43	LOC_Os01g05470	transcription factor X1, putative, expressed
Grain_env2_r2	5	QTN-sf0102534860	1	53	LOC_Os01g05490	triosephosphate isomerase, cytosolic, putative, expressed
Grain_env2_r2	5	QTN-sf0102534860	1	63	LOC_Os01g05500	zinc finger protein, putative, expressed
Grain_env2_r2	5	QTN-sf0102534860	1	-120	LOC_Os01g05150	expressed protein
Grain_env2_r2	5	QTN-sf0102534860	1	-115	LOC_Os01g05160	hypothetical protein
Grain_env2_r2	5	QTN-sf0102534860	1	-112	LOC_Os01g05170	expressed protein
Grain_env2_r2	5	QTN-sf0102534860	1	-97	LOC_Os01g05180	expressed protein
Grain_env2_r2	5	QTN-sf0102534860	1	-90	LOC_Os01g05200	retrotransposon protein, putative, Ty1-copia subclass
Grain_env2_r2	5	QTN-sf0102534860	1	-86	LOC_Os01g05210	hypothetical protein
Grain_env2_r2	5	QTN-sf0102534860	1	-82	LOC_Os01g05220	hypothetical protein
Grain_env2_r2	5	QTN-sf0102534860	1	-77	LOC_Os01g05230	hypothetical protein
Grain_env2_r2	5	QTN-sf0102534860	1	-70	LOC_Os01g05240	retrotransposon protein, putative, unclassified
Grain_env2_r2	5	QTN-sf0102534860	1	-60	LOC_Os01g05250	expressed protein
Grain_env2_r2	5	QTN-sf0102534860	1	-55	LOC_Os01g05260	hypothetical protein
Grain_env2_r2	5	QTN-sf0102534860	1	-47	LOC_Os01g05280	hypothetical protein
Grain_env2_r2	5	QTN-sf0102534860	1	-44	LOC_Os01g05289	expressed protein
Grain_env2_r2	5	QTN-sf0102534860	1	-37	LOC_Os01g05300	hypothetical protein
Grain_env2_r2	5	QTN-sf0102534860	1	-34	LOC_Os01g05310	expressed protein
Grain_env2_r2	5	QTN-sf0102534860	1	-25	LOC_Os01g05320	retrotransposon protein, putative, Ty1-copia subclass
Grain_env2_r2	5	QTN-sf0102534860	1	-20	LOC_Os01g05330	expressed protein
Grain_env2_r2	5	QTN-sf0102534860	1	-13	LOC_Os01g05340	hypothetical protein
Grain_env2_r2	5	QTN-sf0102534860	1	-3	LOC_Os01g05350	hypothetical protein
Grain_env2_r2	5	QTN-sf0102534860	1	0	LOC_Os01g05360	hypothetical protein
Grain_env2_r2	5	QTN-sf0102534860	1	6	LOC_Os01g05380	expressed protein
Grain_env2_r2	5	QTN-sf0102534860	1	12	LOC_Os01g05390	hypothetical protein
Grain_env2_r2	5	QTN-sf0102534860	1	15	LOC_Os01g05400	conserved hypothetical protein
Grain_env2_r2	5	QTN-sf0102534860	1	17	LOC_Os01g05410	hypothetical protein
Grain_env2_r2	5	QTN-sf0102534860	1	37	LOC_Os01g05450	hypothetical protein
Grain_env2_r2	5	QTN-sf0102534860	1	39	LOC_Os01g05460	hypothetical protein
Grain_env2_r2	5	QTN-sf0102534860	1	49	LOC_Os01g05480	expressed protein
Grain_env2_r2	5	QTN-sf0102534860	1	77	LOC_Os01g05510	expressed protein
Grain_env2_r2	5	QTN-sf0102534860	1	93	LOC_Os01g05520	expressed protein
Grain_env2_r2	5	QTN-sf0102534860	1	96	LOC_Os01g05530	expressed protein
Grain_env2_r2	5	QTN-sf0102534860	1	105	LOC_Os01g05540	expressed protein
Grain_env2_r2	5	QTN-sf0102534860	1	115	LOC_Os01g05550	hypothetical protein
Grain_env2_r2	5	QTN-sf0102534860	1	116	LOC_Os01g05560	expressed protein
Grain_BLUP	5	QTN-sf0102852574	1	-115	LOC_Os01g05730	retrotransposon protein, putative, unclassified
Grain_BLUP	5	QTN-sf0102852574	1	-106	LOC_Os01g05744	expressed protein
Grain_BLUP	5	QTN-sf0102852574	1	-100	LOC_Os01g05760	PAS2, putative
Grain_BLUP	5	QTN-sf0102852574	1	-96	LOC_Os01g05770	expressed protein
Grain_BLUP	5	QTN-sf0102852574	1	-92	LOC_Os01g05780	expressed protein
Grain_BLUP	5	QTN-sf0102852574	1	-84	LOC_Os01g05790	SLT1 protein, putative, expressed
Grain_BLUP	5	QTN-sf0102852574	1	-78	LOC_Os01g05800	inner membrane protein, putative, expressed
Grain_BLUP	5	QTN-sf0102852574	1	-71	LOC_Os01g05810	gamma-glutamyltranspeptidase 1 precursor, putative, expressed
Grain_BLUP	5	QTN-sf0102852574	1	-63	LOC_Os01g05820	gamma-glutamyltranspeptidase 1 precursor, putative, expressed
Grain_BLUP	5	QTN-sf0102852574	1	-57	LOC_Os01g05830	expressed protein
Grain_BLUP	5	QTN-sf0102852574	1	-49	LOC_Os01g05840	oxidoreductase, short chain dehydrogenase/reductase family domain containing family, expressed
Grain_BLUP	5	QTN-sf0102852574	1	-48	LOC_Os01g05850	conserved hypothetical protein
Grain_BLUP	5	QTN-sf0102852574	1	-45	LOC_Os01g05860	PPR repeat domain containing protein, putative, expressed
Grain_BLUP	5	QTN-sf0102852574	1	-38	LOC_Os01g05870	receptor kinase, putative, expressed
Grain_BLUP	5	QTN-sf0102852574	1	-37	LOC_Os01g05880	OsFBX1 - F-box domain containing protein, expressed
Grain_BLUP	5	QTN-sf0102852574	1	-34	LOC_Os01g05890	OsFBX2 - F-box domain containing protein
Grain_BLUP	5	QTN-sf0102852574	1	-14	LOC_Os01g05900	Core histone H2A/H2B/H3/H4 domain containing protein, putative
Grain_BLUP	5	QTN-sf0102852574	1	-17	LOC_Os01g05940	receptor kinase, putative, expressed
Grain_BLUP	5	QTN-sf0102852574	1	-10	LOC_Os01g05960	receptor kinase, putative, expressed
Grain_BLUP	5	QTN-sf0102852574	1	8	LOC_Os01g06000	PPR repeat containing protein, expressed
Grain_BLUP	5	QTN-sf0102852574	1	18	LOC_Os01g06010	Core histone H2A/H2B/H3/H4 domain containing protein, putative, expressed
Grain_BLUP	5	QTN-sf0102852574	1	24	LOC_Os01g06020	aspartyl-tRNA synthetase, putative, expressed
Grain_BLUP	5	QTN-sf0102852574	1	31	LOC_Os01g06030	conserved hypothetical protein
Grain_BLUP	5	QTN-sf0102852574	1	33	LOC_Os01g06040	conserved hypothetical protein
Grain_BLUP	5	QTN-sf0102852574	1	39	LOC_Os01g06050	expressed protein
Grain_BLUP	5	QTN-sf0102852574	1	43	LOC_Os01g06060	gibberellin receptor GID1L2, putative, expressed
Grain_BLUP	5	QTN-sf0102852574	1	45	LOC_Os01g06070	conserved hypothetical protein
Grain_BLUP	5	QTN-sf0102852574	1	48	LOC_Os01g06080	conserved hypothetical protein
Grain_BLUP	5	QTN-sf0102852574	1	53	LOC_Os01g06090	expressed protein
Grain_BLUP	5	QTN-sf0102852574	1	56	LOC_Os01g06100	transposon protein, putative, unclassified
Grain_BLUP	5	QTN-sf0102852574	1	59	LOC_Os01g06110	transposon protein, putative, unclassified
Grain_BLUP	5	QTN-sf0102852574	1	66	LOC_Os01g06120	conserved hypothetical protein
Grain_BLUP	5	QTN-sf0102852574	1	69	LOC_Os01g06130	expressed protein
Grain_BLUP	5	QTN-sf0102852574	1	72	LOC_Os01g06140	expressed protein
Grain_BLUP	5	QTN-sf0102852574	1	77	LOC_Os01g06150	expressed protein
Grain_BLUP	5	QTN-sf0102852574	1	81	LOC_Os01g06160	retrotransposon protein, putative, Ty3-gypsy subclass
Grain_BLUP	5	QTN-sf0102852574	1	87	LOC_Os01g06170	retrotransposon protein, putative, unclassified
Grain_BLUP	5	QTN-sf0102852574	1	91	LOC_Os01g06180	retrotransposon protein, putative, unclassified
Grain_BLUP	5	QTN-sf0102852574	1	96	LOC_Os01g06200	retrotransposon protein, putative, unclassified
Grain_BLUP	5	QTN-sf0102852574	1	100	LOC_Os01g06210	gibberellin receptor GID1L2, putative
Grain_BLUP	5	QTN-sf0102852574	1	103	LOC_Os01g06220	gibberellin receptor GID1L2, putative, expressed
Grain_BLUP	5	QTN-sf0102852574	1	107	LOC_Os01g06230	OsSAUR1 - Auxin-responsive SAUR gene family member
Grain_BLUP	5	QTN-sf0102852574	1	108	LOC_Os01g06240	protein kinase, putative, expressed
Grain_BLUP	5	QTN-sf0102852574	1	112	LOC_Os01g06250	dirigent, putative
Grain_BLUP	5	QTN-sf0102852574	1	115	LOC_Os01g06260	hypothetical protein
Grain_env1_r1	6	QTN-sf0301665243	3	-112	LOC_Os03g03550	bZIP family transcription factor, putative, expressed
Grain_env1_r1	6	QTN-sf0301665243	3	-107	LOC_Os03g03560	FHA domain containing protein, putative, expressed
Grain_env1_r1	6	QTN-sf0301665243	3	-99	LOC_Os03g03570	leucine-rich repeat transmembrane protein kinase, putative, expressed
Grain_env1_r1	6	QTN-sf0301665243	3	-94	LOC_Os03g03590	transporter, monovalent cation:proton antiporter-2 family, putative, expressed
Grain_env1_r1	6	QTN-sf0301665243	3	-85	LOC_Os03g03600	fasciclin-like arabinogalactan protein, putative, expressed
Grain_env1_r1	6	QTN-sf0301665243	3	-64	LOC_Os03g03610	1,3-beta-glucan synthase component domain containing protein, expressed
Grain_env1_r1	6	QTN-sf0301665243	3	-57	LOC_Os03g03630	expressed protein
Grain_env1_r1	6	QTN-sf0301665243	3	-54	LOC_Os03g03640	expressed protein
Grain_env1_r1	6	QTN-sf0301665243	3	-49	LOC_Os03g03650	POLD2 - Putative DNA polymerase delta complex subunit, expressed
Grain_env1_r1	6	QTN-sf0301665243	3	-45	LOC_Os03g03654	hypothetical protein
Grain_env1_r1	6	QTN-sf0301665243	3	-36	LOC_Os03g03660	CAMK_CAMK_like.17 - CAMK includes calcium/calmodulin depedent protein kinases, expressed
Grain_env1_r1	6	QTN-sf0301665243	3	-34	LOC_Os03g03670	expressed protein
Grain_env1_r1	6	QTN-sf0301665243	3	-28	LOC_Os03g03680	transporter family protein, putative, expressed
Grain_env1_r1	6	QTN-sf0301665243	3	-19	LOC_Os03g03690	glycosylphosphatidylinositol anchor biosynthesis protein 11, putative, expressed
Grain_env1_r1	6	QTN-sf0301665243	3	-17	LOC_Os03g03700	MLO domain containing protein, putative, expressed
Grain_env1_r1	6	QTN-sf0301665243	3	-4	LOC_Os03g03710	ribonuclease protein, putative, expressed
Grain_env1_r1	6	QTN-sf0301665243	3	0	LOC_Os03g03720	glyceraldehyde-3-phosphate dehydrogenase, putative, expressed
Grain_env1_r1	6	QTN-sf0301665243	3	1	LOC_Os03g03724	expressed protein
Grain_env1_r1	6	QTN-sf0301665243	3	1	LOC_Os03g03730	regulatory protein, putative, expressed
Grain_env1_r1	6	QTN-sf0301665243	3	3	LOC_Os03g03740	retrotransposon protein, putative, unclassified
Grain_env1_r1	6	QTN-sf0301665243	3	4	LOC_Os03g03750	hypothetical protein
Grain_env1_r1	6	QTN-sf0301665243	3	6	LOC_Os03g03760	MYB family transcription factor, putative, expressed
Grain_env1_r1	6	QTN-sf0301665243	3	19	LOC_Os03g03770	expressed protein
Grain_env1_r1	6	QTN-sf0301665243	3	39	LOC_Os03g03790	AMP-binding domain containing protein, expressed
Grain_env1_r1	6	QTN-sf0301665243	3	45	LOC_Os03g03800	hypothetical protein
Grain_env1_r1	6	QTN-sf0301665243	3	48	LOC_Os03g03810	DEF8 - Defensin and Defensin-like DEFL family, expressed
Grain_env1_r1	6	QTN-sf0301665243	3	50	LOC_Os03g03820	adenylate kinase, putative, expressed
Grain_env1_r1	6	QTN-sf0301665243	3	53	LOC_Os03g03830	EF hand family protein, putative, expressed
Grain_env1_r1	6	QTN-sf0301665243	3	64	LOC_Os03g03840	hypothetical protein
Grain_env1_r1	6	QTN-sf0301665243	3	67	LOC_Os03g03850	GATA zinc finger domain containing protein
Grain_env1_r1	6	QTN-sf0301665243	3	71	LOC_Os03g03860	expressed protein
Grain_env1_r1	6	QTN-sf0301665243	3	85	LOC_Os03g03870	DNA-binding bromodomain-containing protein, putative, expressed
Grain_env1_r1	6	QTN-sf0301665243	3	99	LOC_Os03g03880	protein kinase, putative, expressed
Grain_env1_r1	6	QTN-sf0301665243	3	106	LOC_Os03g03890	protein kinase family protein, putative, expressed
Grain_env1_r1	6	QTN-sf0301665243	3	110	LOC_Os03g03900	NIN, putative, expressed
Grain_env1_r2	6	QTN-sf0208384745	2	-67	LOC_Os02g14900	1,3-beta-glucan synthase component domain containing protein, expressed
Grain_env1_r2	6	QTN-sf0208384745	2	-58	LOC_Os02g14910	bZIP transcription factor family protein, putative, expressed
Grain_env1_r2	6	QTN-sf0208384745	2	-41	LOC_Os02g14929	T-complex protein, putative, expressed
Grain_env1_r2	6	QTN-sf0208384745	2	-21	LOC_Os02g14980	calcium-binding EF hand family protein, putative, expressed
Grain_env1_r2	6	QTN-sf0208384745	2	-114	LOC_Os02g14870	conserved hypothetical protein
Grain_env1_r2	6	QTN-sf0208384745	2	-106	LOC_Os02g14874	expressed protein
Grain_env1_r2	6	QTN-sf0208384745	2	-95	LOC_Os02g14880	hypothetical protein
Grain_env1_r2	6	QTN-sf0208384745	2	-91	LOC_Os02g14890	expressed protein
Grain_env1_r2	6	QTN-sf0208384745	2	-20	LOC_Os02g14990	zinc finger, C3HC4 type domain containing protein, expressed
Grain_env1_r2	6	QTN-sf0208384745	2	-32	LOC_Os02g14970	hypothetical protein
Grain_env1_r2	6	QTN-sf0208384745	2	-16	LOC_Os02g15000	zinc finger, C3HC4 type domain containing protein, expressed
Grain_env1_r2	6	QTN-sf0208384745	2	1	LOC_Os02g15030	hypothetical protein
Grain_env1_r2	6	QTN-sf0208384745	2	5	LOC_Os02g15040	hypothetical protein
Grain_env1_r2	6	QTN-sf0208384745	2	9	LOC_Os02g15050	hypothetical protein
Grain_env1_r2	6	QTN-sf0208384745	2	-8	LOC_Os02g15010	zinc finger, C3HC4 type domain containing protein, expressed
Grain_env1_r2	6	QTN-sf0208384745	2	-3	LOC_Os02g15020	zinc finger, C3HC4 type domain containing protein
Grain_env1_r2	6	QTN-sf0208384745	2	12	LOC_Os02g15060	zinc finger, C3HC4 type domain containing protein
Grain_env1_r2	6	QTN-sf0208384745	2	44	LOC_Os02g15130	hypothetical protein
Grain_env1_r2	6	QTN-sf0208384745	2	48	LOC_Os02g15140	retrotransposon protein, putative, unclassified, expressed
Grain_env1_r2	6	QTN-sf0208384745	2	16	LOC_Os02g15070	glutelin, putative, expressed
Grain_env1_r2	6	QTN-sf0208384745	2	20	LOC_Os02g15080	zinc finger, C3HC4 type domain containing protein, expressed
Grain_env1_r2	6	QTN-sf0208384745	2	85	LOC_Os02g15190	retrotransposon protein, putative, unclassified
Grain_env1_r2	6	QTN-sf0208384745	2	94	LOC_Os02g15200	hypothetical protein
Grain_env1_r2	6	QTN-sf0208384745	2	96	LOC_Os02g15210	hypothetical protein
Grain_env1_r2	6	QTN-sf0208384745	2	21	LOC_Os02g15090	glutelin, putative, expressed
Grain_env1_r2	6	QTN-sf0208384745	2	26	LOC_Os02g15100	zinc finger, C3HC4 type domain containing protein, expressed
Grain_env1_r2	6	QTN-sf0208384745	2	32	LOC_Os02g15110	zinc finger, C3HC4 type domain containing protein, expressed
Grain_env1_r2	6	QTN-sf0208384745	2	38	LOC_Os02g15120	RING-H2 finger protein, putative, expressed
Grain_env1_r2	6	QTN-sf0208384745	2	61	LOC_Os02g15150	glutelin, putative, expressed
Grain_env1_r2	6	QTN-sf0208384745	2	69	LOC_Os02g15160	OsFBX40 - F-box domain containing protein, expressed
Grain_env1_r2	6	QTN-sf0208384745	2	73	LOC_Os02g15169	glutelin, putative, expressed
Grain_env1_r2	6	QTN-sf0208384745	2	80	LOC_Os02g15178	glutelin, putative, expressed
Grain_env1_r2	6	QTN-sf0208384745	2	105	LOC_Os02g15220	bromodomain containing protein, expressed
Grain_env1_r2	6	QTN-sf0208384745	2	116	LOC_Os02g15230	GDSL-like lipase/acylhydrolase, putative, expressed
Grain_env2_r1	6	QTN-sf0208389994	2	-72	LOC_Os02g14900	1,3-beta-glucan synthase component domain containing protein, expressed
Grain_env2_r1	6	QTN-sf0208389994	2	-119	LOC_Os02g14870	conserved hypothetical protein
Grain_env2_r1	6	QTN-sf0208389994	2	-111	LOC_Os02g14874	expressed protein
Grain_env2_r1	6	QTN-sf0208389994	2	-100	LOC_Os02g14880	hypothetical protein
Grain_env2_r1	6	QTN-sf0208389994	2	-96	LOC_Os02g14890	expressed protein
Grain_env2_r1	6	QTN-sf0208389994	2	-37	LOC_Os02g14970	hypothetical protein
Grain_env2_r1	6	QTN-sf0208389994	2	-3	LOC_Os02g15030	hypothetical protein
Grain_env2_r1	6	QTN-sf0208389994	2	0	LOC_Os02g15040	hypothetical protein
Grain_env2_r1	6	QTN-sf0208389994	2	4	LOC_Os02g15050	hypothetical protein
Grain_env2_r1	6	QTN-sf0208389994	2	38	LOC_Os02g15130	hypothetical protein
Grain_env2_r1	6	QTN-sf0208389994	2	43	LOC_Os02g15140	retrotransposon protein, putative, unclassified, expressed
Grain_env2_r1	6	QTN-sf0208389994	2	80	LOC_Os02g15190	retrotransposon protein, putative, unclassified
Grain_env2_r1	6	QTN-sf0208389994	2	89	LOC_Os02g15200	hypothetical protein
Grain_env2_r1	6	QTN-sf0208389994	2	91	LOC_Os02g15210	hypothetical protein
Grain_env2_r1	6	QTN-sf0208389994	2	-64	LOC_Os02g14910	bZIP transcription factor family protein, putative, expressed
Grain_env2_r1	6	QTN-sf0208389994	2	-46	LOC_Os02g14929	T-complex protein, putative, expressed
Grain_env2_r1	6	QTN-sf0208389994	2	-27	LOC_Os02g14980	calcium-binding EF hand family protein, putative, expressed
Grain_env2_r1	6	QTN-sf0208389994	2	-26	LOC_Os02g14990	zinc finger, C3HC4 type domain containing protein, expressed
Grain_env2_r1	6	QTN-sf0208389994	2	-21	LOC_Os02g15000	zinc finger, C3HC4 type domain containing protein, expressed
Grain_env2_r1	6	QTN-sf0208389994	2	-14	LOC_Os02g15010	zinc finger, C3HC4 type domain containing protein, expressed
Grain_env2_r1	6	QTN-sf0208389994	2	-8	LOC_Os02g15020	zinc finger, C3HC4 type domain containing protein
Grain_env2_r1	6	QTN-sf0208389994	2	6	LOC_Os02g15060	zinc finger, C3HC4 type domain containing protein
Grain_env2_r1	6	QTN-sf0208389994	2	11	LOC_Os02g15070	glutelin, putative, expressed
Grain_env2_r1	6	QTN-sf0208389994	2	15	LOC_Os02g15080	zinc finger, C3HC4 type domain containing protein, expressed
Grain_env2_r1	6	QTN-sf0208389994	2	16	LOC_Os02g15090	glutelin, putative, expressed
Grain_env2_r1	6	QTN-sf0208389994	2	21	LOC_Os02g15100	zinc finger, C3HC4 type domain containing protein, expressed
Grain_env2_r1	6	QTN-sf0208389994	2	27	LOC_Os02g15110	zinc finger, C3HC4 type domain containing protein, expressed
Grain_env2_r1	6	QTN-sf0208389994	2	32	LOC_Os02g15120	RING-H2 finger protein, putative, expressed
Grain_env2_r1	6	QTN-sf0208389994	2	56	LOC_Os02g15150	glutelin, putative, expressed
Grain_env2_r1	6	QTN-sf0208389994	2	63	LOC_Os02g15160	OsFBX40 - F-box domain containing protein, expressed
Grain_env2_r1	6	QTN-sf0208389994	2	68	LOC_Os02g15169	glutelin, putative, expressed
Grain_env2_r1	6	QTN-sf0208389994	2	75	LOC_Os02g15178	glutelin, putative, expressed
Grain_env2_r1	6	QTN-sf0208389994	2	100	LOC_Os02g15220	bromodomain containing protein, expressed
Grain_env2_r1	6	QTN-sf0208389994	2	111	LOC_Os02g15230	GDSL-like lipase/acylhydrolase, putative, expressed
Grain_env2_r2	6	QTN-sf0102872596	1	-120	LOC_Os01g05760	PAS2, putative
Grain_env2_r2	6	QTN-sf0102872596	1	-104	LOC_Os01g05790	SLT1 protein, putative, expressed
Grain_env2_r2	6	QTN-sf0102872596	1	-98	LOC_Os01g05800	inner membrane protein, putative, expressed
Grain_env2_r2	6	QTN-sf0102872596	1	-91	LOC_Os01g05810	gamma-glutamyltranspeptidase 1 precursor, putative, expressed
Grain_env2_r2	6	QTN-sf0102872596	1	-83	LOC_Os01g05820	gamma-glutamyltranspeptidase 1 precursor, putative, expressed
Grain_env2_r2	6	QTN-sf0102872596	1	-69	LOC_Os01g05840	oxidoreductase, short chain dehydrogenase/reductase family domain containing family, expressed
Grain_env2_r2	6	QTN-sf0102872596	1	-65	LOC_Os01g05860	PPR repeat domain containing protein, putative, expressed
Grain_env2_r2	6	QTN-sf0102872596	1	-58	LOC_Os01g05870	receptor kinase, putative, expressed
Grain_env2_r2	6	QTN-sf0102872596	1	-57	LOC_Os01g05880	OsFBX1 - F-box domain containing protein, expressed
Grain_env2_r2	6	QTN-sf0102872596	1	-54	LOC_Os01g05890	OsFBX2 - F-box domain containing protein
Grain_env2_r2	6	QTN-sf0102872596	1	-35	LOC_Os01g05900	Core histone H2A/H2B/H3/H4 domain containing protein, putative
Grain_env2_r2	6	QTN-sf0102872596	1	-37	LOC_Os01g05940	receptor kinase, putative, expressed
Grain_env2_r2	6	QTN-sf0102872596	1	-30	LOC_Os01g05960	receptor kinase, putative, expressed
Grain_env2_r2	6	QTN-sf0102872596	1	-15	LOC_Os01g05970	OsFBO1 - F-box and other domain containing protein, expressed
Grain_env2_r2	6	QTN-sf0102872596	1	-18	LOC_Os01g05980	receptor kinase, putative
Grain_env2_r2	6	QTN-sf0102872596	1	-6	LOC_Os01g06000	PPR repeat containing protein, expressed
Grain_env2_r2	6	QTN-sf0102872596	1	0	LOC_Os01g06010	Core histone H2A/H2B/H3/H4 domain containing protein, putative, expressed
Grain_env2_r2	6	QTN-sf0102872596	1	4	LOC_Os01g06020	aspartyl-tRNA synthetase, putative, expressed
Grain_env2_r2	6	QTN-sf0102872596	1	-116	LOC_Os01g05770	expressed protein
Grain_env2_r2	6	QTN-sf0102872596	1	-112	LOC_Os01g05780	expressed protein
Grain_env2_r2	6	QTN-sf0102872596	1	23	LOC_Os01g06060	gibberellin receptor GID1L2, putative, expressed
Grain_env2_r2	6	QTN-sf0102872596	1	80	LOC_Os01g06210	gibberellin receptor GID1L2, putative
Grain_env2_r2	6	QTN-sf0102872596	1	-77	LOC_Os01g05830	expressed protein
Grain_env2_r2	6	QTN-sf0102872596	1	83	LOC_Os01g06220	gibberellin receptor GID1L2, putative, expressed
Grain_env2_r2	6	QTN-sf0102872596	1	-68	LOC_Os01g05850	conserved hypothetical protein
Grain_env2_r2	6	QTN-sf0102872596	1	87	LOC_Os01g06230	OsSAUR1 - Auxin-responsive SAUR gene family member
Grain_env2_r2	6	QTN-sf0102872596	1	88	LOC_Os01g06240	protein kinase, putative, expressed
Grain_env2_r2	6	QTN-sf0102872596	1	92	LOC_Os01g06250	dirigent, putative
Grain_env2_r2	6	QTN-sf0102872596	1	108	LOC_Os01g06280	TKL_IRAK_CrRLK1L-1.4 - The CrRLK1L-1 subfamily has homology to the CrRLK1L homolog, expressed
Grain_env2_r2	6	QTN-sf0102872596	1	111	LOC_Os01g06290	splicing factor, arginine/serine-rich, putative, expressed
Grain_env2_r2	6	QTN-sf0102872596	1	11	LOC_Os01g06030	conserved hypothetical protein
Grain_env2_r2	6	QTN-sf0102872596	1	13	LOC_Os01g06040	conserved hypothetical protein
Grain_env2_r2	6	QTN-sf0102872596	1	19	LOC_Os01g06050	expressed protein
Grain_env2_r2	6	QTN-sf0102872596	1	25	LOC_Os01g06070	conserved hypothetical protein
Grain_env2_r2	6	QTN-sf0102872596	1	28	LOC_Os01g06080	conserved hypothetical protein
Grain_env2_r2	6	QTN-sf0102872596	1	33	LOC_Os01g06090	expressed protein
Grain_env2_r2	6	QTN-sf0102872596	1	36	LOC_Os01g06100	transposon protein, putative, unclassified
Grain_env2_r2	6	QTN-sf0102872596	1	39	LOC_Os01g06110	transposon protein, putative, unclassified
Grain_env2_r2	6	QTN-sf0102872596	1	46	LOC_Os01g06120	conserved hypothetical protein
Grain_env2_r2	6	QTN-sf0102872596	1	49	LOC_Os01g06130	expressed protein
Grain_env2_r2	6	QTN-sf0102872596	1	52	LOC_Os01g06140	expressed protein
Grain_env2_r2	6	QTN-sf0102872596	1	57	LOC_Os01g06150	expressed protein
Grain_env2_r2	6	QTN-sf0102872596	1	61	LOC_Os01g06160	retrotransposon protein, putative, Ty3-gypsy subclass
Grain_env2_r2	6	QTN-sf0102872596	1	67	LOC_Os01g06170	retrotransposon protein, putative, unclassified
Grain_env2_r2	6	QTN-sf0102872596	1	71	LOC_Os01g06180	retrotransposon protein, putative, unclassified
Grain_env2_r2	6	QTN-sf0102872596	1	76	LOC_Os01g06200	retrotransposon protein, putative, unclassified
Grain_env2_r2	6	QTN-sf0102872596	1	95	LOC_Os01g06260	hypothetical protein
Grain_env2_r2	6	QTN-sf0102872596	1	97	LOC_Os01g06270	expressed protein
Grain_BLUP	6	QTN-sf0103080436	1	-119	LOC_Os01g06230	OsSAUR1 - Auxin-responsive SAUR gene family member
Grain_BLUP	6	QTN-sf0103080436	1	-116	LOC_Os01g06240	protein kinase, putative, expressed
Grain_BLUP	6	QTN-sf0103080436	1	-114	LOC_Os01g06250	dirigent, putative
Grain_BLUP	6	QTN-sf0103080436	1	-110	LOC_Os01g06260	hypothetical protein
Grain_BLUP	6	QTN-sf0103080436	1	-102	LOC_Os01g06270	expressed protein
Grain_BLUP	6	QTN-sf0103080436	1	-94	LOC_Os01g06280	TKL_IRAK_CrRLK1L-1.4 - The CrRLK1L-1 subfamily has homology to the CrRLK1L homolog, expressed
Grain_BLUP	6	QTN-sf0103080436	1	-92	LOC_Os01g06290	splicing factor, arginine/serine-rich, putative, expressed
Grain_BLUP	6	QTN-sf0103080436	1	-84	LOC_Os01g06300	transposon protein, putative, unclassified
Grain_BLUP	6	QTN-sf0103080436	1	-80	LOC_Os01g06310	glycine-rich cell wall structural protein precursor, putative, expressed
Grain_BLUP	6	QTN-sf0103080436	1	-75	LOC_Os01g06320	MYB family transcription factor, putative, expressed
Grain_BLUP	6	QTN-sf0103080436	1	-69	LOC_Os01g06330	retrotransposon protein, putative, unclassified
Grain_BLUP	6	QTN-sf0103080436	1	-66	LOC_Os01g06340	expressed protein
Grain_BLUP	6	QTN-sf0103080436	1	-65	LOC_Os01g06350	hypothetical protein
Grain_BLUP	6	QTN-sf0103080436	1	-59	LOC_Os01g06360	transposon protein, putative, unclassified
Grain_BLUP	6	QTN-sf0103080436	1	-55	LOC_Os01g06370	hypothetical protein
Grain_BLUP	6	QTN-sf0103080436	1	-53	LOC_Os01g06380	hypothetical protein
Grain_BLUP	6	QTN-sf0103080436	1	-50	LOC_Os01g06390	hypothetical protein
Grain_BLUP	6	QTN-sf0103080436	1	-48	LOC_Os01g06400	expressed protein
Grain_BLUP	6	QTN-sf0103080436	1	-46	LOC_Os01g06410	hypothetical protein
Grain_BLUP	6	QTN-sf0103080436	1	-45	LOC_Os01g06420	hypothetical protein
Grain_BLUP	6	QTN-sf0103080436	1	-44	LOC_Os01g06430	expressed protein
Grain_BLUP	6	QTN-sf0103080436	1	-42	LOC_Os01g06440	expressed protein
Grain_BLUP	6	QTN-sf0103080436	1	-40	LOC_Os01g06450	glycosyltransferase family 43 protein, putative, expressed
Grain_BLUP	6	QTN-sf0103080436	1	-37	LOC_Os01g06454	heat shock protein DnaJ, putative, expressed
Grain_BLUP	6	QTN-sf0103080436	1	-34	LOC_Os01g06460	uncharacterized Cys-rich domain containing protein, putative, expressed
Grain_BLUP	6	QTN-sf0103080436	1	-29	LOC_Os01g06470	expressed protein
Grain_BLUP	6	QTN-sf0103080436	1	-24	LOC_Os01g06490	OsSCP1 - Putative Serine Carboxypeptidase homologue, expressed
Grain_BLUP	6	QTN-sf0103080436	1	-21	LOC_Os01g06500	PHLOEM 2-LIKE A5, putative, expressed
Grain_BLUP	6	QTN-sf0103080436	1	-15	LOC_Os01g06510	arginyl-tRNA synthetase, putative, expressed
Grain_BLUP	6	QTN-sf0103080436	1	-10	LOC_Os01g06520	verticillium wilt disease resistance protein, putative, expressed
Grain_BLUP	6	QTN-sf0103080436	1	1	LOC_Os01g06540	PHD finger protein, putative
Grain_BLUP	6	QTN-sf0103080436	1	3	LOC_Os01g06550	NF-X1-type zinc finger protein, putative, expressed
Grain_BLUP	6	QTN-sf0103080436	1	9	LOC_Os01g06560	transcription factor HBP-1b, putative, expressed
Grain_BLUP	6	QTN-sf0103080436	1	13	LOC_Os01g06570	hypothetical protein
Grain_BLUP	6	QTN-sf0103080436	1	15	LOC_Os01g06580	fasciclin domain containing protein, expressed
Grain_BLUP	6	QTN-sf0103080436	1	17	LOC_Os01g06590	zinc finger, C3HC4 type domain containing protein, expressed
Grain_BLUP	6	QTN-sf0103080436	1	26	LOC_Os01g06600	glutaryl-CoA dehydrogenase, mitochondrial precursor, putative, expressed
Grain_BLUP	6	QTN-sf0103080436	1	34	LOC_Os01g06610	retrotransposon protein, putative, Ty3-gypsy subclass
Grain_BLUP	6	QTN-sf0103080436	1	41	LOC_Os01g06620	expressed protein
Grain_BLUP	6	QTN-sf0103080436	1	42	LOC_Os01g06630	small hydrophilic plant seed protein, putative, expressed
Grain_BLUP	6	QTN-sf0103080436	1	47	LOC_Os01g06640	basic helix-loop-helix, putative, expressed
Grain_BLUP	6	QTN-sf0103080436	1	52	LOC_Os01g06650	retrotransposon protein, putative, unclassified
Grain_BLUP	6	QTN-sf0103080436	1	54	LOC_Os01g06660	thiamine pyrophosphate enzyme, C-terminal TPP binding domain containing protein, expressed
Grain_BLUP	6	QTN-sf0103080436	1	62	LOC_Os01g06670	hcr2-5D, putative, expressed
Grain_BLUP	6	QTN-sf0103080436	1	65	LOC_Os01g06680	retrotransposon protein, putative, unclassified, expressed
Grain_BLUP	6	QTN-sf0103080436	1	75	LOC_Os01g06690	retrotransposon protein, putative, unclassified
Grain_BLUP	6	QTN-sf0103080436	1	79	LOC_Os01g06700	retrotransposon protein, putative, unclassified
Grain_BLUP	6	QTN-sf0103080436	1	86	LOC_Os01g06710	retrotransposon protein, putative, unclassified
Grain_BLUP	6	QTN-sf0103080436	1	95	LOC_Os01g06720	disease resistance protein SlVe2 precursor, putative
Grain_BLUP	6	QTN-sf0103080436	1	100	LOC_Os01g06730	verticillium wilt disease resistance protein, putative, expressed
Grain_BLUP	6	QTN-sf0103080436	1	107	LOC_Os01g06740	ribosome inactivating protein, putative, expressed
Grain_BLUP	6	QTN-sf0103080436	1	115	LOC_Os01g06750	verticillium wilt disease resistance protein precursor, putative
Grain_env1_r1	7	QTN-sf0302400247	3	-116	LOC_Os03g04800	retrotransposon protein, putative, Ty3-gypsy subclass
Grain_env1_r1	7	QTN-sf0302400247	3	-113	LOC_Os03g04810	retrotransposon protein, putative, Ty3-gypsy subclass
Grain_env1_r1	7	QTN-sf0302400247	3	-109	LOC_Os03g04820	conserved hypothetical protein
Grain_env1_r1	7	QTN-sf0302400247	3	-101	LOC_Os03g04830	expressed protein
Grain_env1_r1	7	QTN-sf0302400247	3	-94	LOC_Os03g04840	expressed protein
Grain_env1_r1	7	QTN-sf0302400247	3	-86	LOC_Os03g04850	hypothetical protein
Grain_env1_r1	7	QTN-sf0302400247	3	-76	LOC_Os03g04860	retrotransposon protein, putative, Ty3-gypsy subclass
Grain_env1_r1	7	QTN-sf0302400247	3	-69	LOC_Os03g04870	expressed protein
Grain_env1_r1	7	QTN-sf0302400247	3	-59	LOC_Os03g04890	zinc finger family protein, putative, expressed
Grain_env1_r1	7	QTN-sf0302400247	3	-58	LOC_Os03g04900	MYB family transcription factor, putative, expressed
Grain_env1_r1	7	QTN-sf0302400247	3	-42	LOC_Os03g04910	retrotransposon protein, putative, unclassified
Grain_env1_r1	7	QTN-sf0302400247	3	-26	LOC_Os03g04920	multidrug resistance-associated protein, putative, expressed
Grain_env1_r1	7	QTN-sf0302400247	3	-23	LOC_Os03g04930	expressed protein
Grain_env1_r1	7	QTN-sf0302400247	3	-16	LOC_Os03g04940	methyltransferase, putative, expressed
Grain_env1_r1	7	QTN-sf0302400247	3	-11	LOC_Os03g04950	OsSub26 - Putative Subtilisin homologue, expressed
Grain_env1_r1	7	QTN-sf0302400247	3	0	LOC_Os03g04960	cysteinyl-tRNA synthetase, putative, expressed
Grain_env1_r1	7	QTN-sf0302400247	3	8	LOC_Os03g04980	PHD-finger domain containing protein, putative, expressed
Grain_env1_r1	7	QTN-sf0302400247	3	14	LOC_Os03g04990	expressed protein
Grain_env1_r1	7	QTN-sf0302400247	3	20	LOC_Os03g05000	retrotransposon protein, putative, unclassified
Grain_env1_r1	7	QTN-sf0302400247	3	24	LOC_Os03g05010	retrotransposon protein, putative, unclassified
Grain_env1_r1	7	QTN-sf0302400247	3	31	LOC_Os03g05020	PIR, putative, expressed
Grain_env1_r1	7	QTN-sf0302400247	3	48	LOC_Os03g05030	dirigent, putative, expressed
Grain_env1_r1	7	QTN-sf0302400247	3	49	LOC_Os03g05040	expressed protein
Grain_env1_r1	7	QTN-sf0302400247	3	59	LOC_Os03g05049	expressed protein
Grain_env1_r1	7	QTN-sf0302400247	3	65	LOC_Os03g05060	exostosin family domain containing protein, expressed
Grain_env1_r1	7	QTN-sf0302400247	3	69	LOC_Os03g05070	exostosin family domain containing protein, expressed
Grain_env1_r1	7	QTN-sf0302400247	3	73	LOC_Os03g05080	hypothetical protein
Grain_env1_r1	7	QTN-sf0302400247	3	78	LOC_Os03g05090	transposon protein, putative, unclassified
Grain_env1_r1	7	QTN-sf0302400247	3	81	LOC_Os03g05100	expressed protein
Grain_env1_r1	7	QTN-sf0302400247	3	85	LOC_Os03g05110	xyloglucan galactosyltransferase KATAMARI1, putative, expressed
Grain_env1_r1	7	QTN-sf0302400247	3	90	LOC_Os03g05120	hypothetical protein
Grain_env1_r1	7	QTN-sf0302400247	3	93	LOC_Os03g05130	hypothetical protein
Grain_env1_r1	7	QTN-sf0302400247	3	94	LOC_Os03g05140	receptor-like protein kinase 2 precursor, putative
Grain_env1_r1	7	QTN-sf0302400247	3	97	LOC_Os03g05150	hypothetical protein
Grain_env1_r1	7	QTN-sf0302400247	3	104	LOC_Os03g05160	GATA zinc finger domain containing protein, expressed
Grain_env1_r1	7	QTN-sf0302400247	3	106	LOC_Os03g05170	hypothetical protein
Grain_env1_r1	7	QTN-sf0302400247	3	111	LOC_Os03g05180	expressed protein
Grain_env1_r2	7	QTN-sf0208464791	2	-101	LOC_Os02g14980	calcium-binding EF hand family protein, putative, expressed
Grain_env1_r2	7	QTN-sf0208464791	2	-100	LOC_Os02g14990	zinc finger, C3HC4 type domain containing protein, expressed
Grain_env1_r2	7	QTN-sf0208464791	2	-96	LOC_Os02g15000	zinc finger, C3HC4 type domain containing protein, expressed
Grain_env1_r2	7	QTN-sf0208464791	2	-88	LOC_Os02g15010	zinc finger, C3HC4 type domain containing protein, expressed
Grain_env1_r2	7	QTN-sf0208464791	2	-83	LOC_Os02g15020	zinc finger, C3HC4 type domain containing protein
Grain_env1_r2	7	QTN-sf0208464791	2	-65	LOC_Os02g15060	zinc finger, C3HC4 type domain containing protein
Grain_env1_r2	7	QTN-sf0208464791	2	-61	LOC_Os02g15070	glutelin, putative, expressed
Grain_env1_r2	7	QTN-sf0208464791	2	-58	LOC_Os02g15080	zinc finger, C3HC4 type domain containing protein, expressed
Grain_env1_r2	7	QTN-sf0208464791	2	-56	LOC_Os02g15090	glutelin, putative, expressed
Grain_env1_r2	7	QTN-sf0208464791	2	-112	LOC_Os02g14970	hypothetical protein
Grain_env1_r2	7	QTN-sf0208464791	2	-52	LOC_Os02g15100	zinc finger, C3HC4 type domain containing protein, expressed
Grain_env1_r2	7	QTN-sf0208464791	2	-47	LOC_Os02g15110	zinc finger, C3HC4 type domain containing protein, expressed
Grain_env1_r2	7	QTN-sf0208464791	2	-78	LOC_Os02g15030	hypothetical protein
Grain_env1_r2	7	QTN-sf0208464791	2	-72	LOC_Os02g15040	hypothetical protein
Grain_env1_r2	7	QTN-sf0208464791	2	-69	LOC_Os02g15050	hypothetical protein
Grain_env1_r2	7	QTN-sf0208464791	2	-40	LOC_Os02g15120	RING-H2 finger protein, putative, expressed
Grain_env1_r2	7	QTN-sf0208464791	2	-16	LOC_Os02g15150	glutelin, putative, expressed
Grain_env1_r2	7	QTN-sf0208464791	2	-8	LOC_Os02g15160	OsFBX40 - F-box domain containing protein, expressed
Grain_env1_r2	7	QTN-sf0208464791	2	-4	LOC_Os02g15169	glutelin, putative, expressed
Grain_env1_r2	7	QTN-sf0208464791	2	-35	LOC_Os02g15130	hypothetical protein
Grain_env1_r2	7	QTN-sf0208464791	2	-28	LOC_Os02g15140	retrotransposon protein, putative, unclassified, expressed
Grain_env1_r2	7	QTN-sf0208464791	2	0	LOC_Os02g15178	glutelin, putative, expressed
Grain_env1_r2	7	QTN-sf0208464791	2	25	LOC_Os02g15220	bromodomain containing protein, expressed
Grain_env1_r2	7	QTN-sf0208464791	2	5	LOC_Os02g15190	retrotransposon protein, putative, unclassified
Grain_env1_r2	7	QTN-sf0208464791	2	14	LOC_Os02g15200	hypothetical protein
Grain_env1_r2	7	QTN-sf0208464791	2	16	LOC_Os02g15210	hypothetical protein
Grain_env1_r2	7	QTN-sf0208464791	2	36	LOC_Os02g15230	GDSL-like lipase/acylhydrolase, putative, expressed
Grain_env1_r2	7	QTN-sf0208464791	2	43	LOC_Os02g15240	transposon protein, putative, unclassified
Grain_env1_r2	7	QTN-sf0208464791	2	51	LOC_Os02g15250	late embryogenesis abundant domain-containing protein, putative, expressed
Grain_env1_r2	7	QTN-sf0208464791	2	60	LOC_Os02g15260	hypothetical protein
Grain_env1_r2	7	QTN-sf0208464791	2	71	LOC_Os02g15270	tyrosine-protein phosphatase YVH1, putative, expressed
Grain_env1_r2	7	QTN-sf0208464791	2	74	LOC_Os02g15280	VQ domain containing protein, putative, expressed
Grain_env1_r2	7	QTN-sf0208464791	2	76	LOC_Os02g15290	VQ domain containing protein, putative, expressed
Grain_env1_r2	7	QTN-sf0208464791	2	78	LOC_Os02g15300	hypothetical protein
Grain_env1_r2	7	QTN-sf0208464791	2	89	LOC_Os02g15310	RNA recognition motif containing protein, expressed
Grain_env1_r2	7	QTN-sf0208464791	2	101	LOC_Os02g15320	transposon protein, putative, CACTA, En/Spm sub-class
Grain_env1_r2	7	QTN-sf0208464791	2	107	LOC_Os02g15330	transposon protein, putative, CACTA, En/Spm sub-class
Grain_env1_r2	7	QTN-sf0208464791	2	117	LOC_Os02g15340	no apical meristem protein, putative, expressed
Grain_env2_r1	7	QTN-sf0208389999	2	-72	LOC_Os02g14900	1,3-beta-glucan synthase component domain containing protein, expressed
Grain_env2_r1	7	QTN-sf0208389999	2	-119	LOC_Os02g14870	conserved hypothetical protein
Grain_env2_r1	7	QTN-sf0208389999	2	-111	LOC_Os02g14874	expressed protein
Grain_env2_r1	7	QTN-sf0208389999	2	-100	LOC_Os02g14880	hypothetical protein
Grain_env2_r1	7	QTN-sf0208389999	2	-96	LOC_Os02g14890	expressed protein
Grain_env2_r1	7	QTN-sf0208389999	2	-64	LOC_Os02g14910	bZIP transcription factor family protein, putative, expressed
Grain_env2_r1	7	QTN-sf0208389999	2	-37	LOC_Os02g14970	hypothetical protein
Grain_env2_r1	7	QTN-sf0208389999	2	-3	LOC_Os02g15030	hypothetical protein
Grain_env2_r1	7	QTN-sf0208389999	2	0	LOC_Os02g15040	hypothetical protein
Grain_env2_r1	7	QTN-sf0208389999	2	4	LOC_Os02g15050	hypothetical protein
Grain_env2_r1	7	QTN-sf0208389999	2	38	LOC_Os02g15130	hypothetical protein
Grain_env2_r1	7	QTN-sf0208389999	2	43	LOC_Os02g15140	retrotransposon protein, putative, unclassified, expressed
Grain_env2_r1	7	QTN-sf0208389999	2	80	LOC_Os02g15190	retrotransposon protein, putative, unclassified
Grain_env2_r1	7	QTN-sf0208389999	2	89	LOC_Os02g15200	hypothetical protein
Grain_env2_r1	7	QTN-sf0208389999	2	91	LOC_Os02g15210	hypothetical protein
Grain_env2_r1	7	QTN-sf0208389999	2	-46	LOC_Os02g14929	T-complex protein, putative, expressed
Grain_env2_r1	7	QTN-sf0208389999	2	-27	LOC_Os02g14980	calcium-binding EF hand family protein, putative, expressed
Grain_env2_r1	7	QTN-sf0208389999	2	-26	LOC_Os02g14990	zinc finger, C3HC4 type domain containing protein, expressed
Grain_env2_r1	7	QTN-sf0208389999	2	-21	LOC_Os02g15000	zinc finger, C3HC4 type domain containing protein, expressed
Grain_env2_r1	7	QTN-sf0208389999	2	-14	LOC_Os02g15010	zinc finger, C3HC4 type domain containing protein, expressed
Grain_env2_r1	7	QTN-sf0208389999	2	-8	LOC_Os02g15020	zinc finger, C3HC4 type domain containing protein
Grain_env2_r1	7	QTN-sf0208389999	2	6	LOC_Os02g15060	zinc finger, C3HC4 type domain containing protein
Grain_env2_r1	7	QTN-sf0208389999	2	11	LOC_Os02g15070	glutelin, putative, expressed
Grain_env2_r1	7	QTN-sf0208389999	2	15	LOC_Os02g15080	zinc finger, C3HC4 type domain containing protein, expressed
Grain_env2_r1	7	QTN-sf0208389999	2	16	LOC_Os02g15090	glutelin, putative, expressed
Grain_env2_r1	7	QTN-sf0208389999	2	21	LOC_Os02g15100	zinc finger, C3HC4 type domain containing protein, expressed
Grain_env2_r1	7	QTN-sf0208389999	2	27	LOC_Os02g15110	zinc finger, C3HC4 type domain containing protein, expressed
Grain_env2_r1	7	QTN-sf0208389999	2	32	LOC_Os02g15120	RING-H2 finger protein, putative, expressed
Grain_env2_r1	7	QTN-sf0208389999	2	56	LOC_Os02g15150	glutelin, putative, expressed
Grain_env2_r1	7	QTN-sf0208389999	2	63	LOC_Os02g15160	OsFBX40 - F-box domain containing protein, expressed
Grain_env2_r1	7	QTN-sf0208389999	2	68	LOC_Os02g15169	glutelin, putative, expressed
Grain_env2_r1	7	QTN-sf0208389999	2	75	LOC_Os02g15178	glutelin, putative, expressed
Grain_env2_r1	7	QTN-sf0208389999	2	100	LOC_Os02g15220	bromodomain containing protein, expressed
Grain_env2_r1	7	QTN-sf0208389999	2	111	LOC_Os02g15230	GDSL-like lipase/acylhydrolase, putative, expressed
Grain_env2_r2	7	QTN-sf0102872850	1	-120	LOC_Os01g05760	PAS2, putative
Grain_env2_r2	7	QTN-sf0102872850	1	-105	LOC_Os01g05790	SLT1 protein, putative, expressed
Grain_env2_r2	7	QTN-sf0102872850	1	-99	LOC_Os01g05800	inner membrane protein, putative, expressed
Grain_env2_r2	7	QTN-sf0102872850	1	-92	LOC_Os01g05810	gamma-glutamyltranspeptidase 1 precursor, putative, expressed
Grain_env2_r2	7	QTN-sf0102872850	1	-83	LOC_Os01g05820	gamma-glutamyltranspeptidase 1 precursor, putative, expressed
Grain_env2_r2	7	QTN-sf0102872850	1	-70	LOC_Os01g05840	oxidoreductase, short chain dehydrogenase/reductase family domain containing family, expressed
Grain_env2_r2	7	QTN-sf0102872850	1	-65	LOC_Os01g05860	PPR repeat domain containing protein, putative, expressed
Grain_env2_r2	7	QTN-sf0102872850	1	-58	LOC_Os01g05870	receptor kinase, putative, expressed
Grain_env2_r2	7	QTN-sf0102872850	1	-57	LOC_Os01g05880	OsFBX1 - F-box domain containing protein, expressed
Grain_env2_r2	7	QTN-sf0102872850	1	-54	LOC_Os01g05890	OsFBX2 - F-box domain containing protein
Grain_env2_r2	7	QTN-sf0102872850	1	-35	LOC_Os01g05900	Core histone H2A/H2B/H3/H4 domain containing protein, putative
Grain_env2_r2	7	QTN-sf0102872850	1	-37	LOC_Os01g05940	receptor kinase, putative, expressed
Grain_env2_r2	7	QTN-sf0102872850	1	-30	LOC_Os01g05960	receptor kinase, putative, expressed
Grain_env2_r2	7	QTN-sf0102872850	1	-15	LOC_Os01g05970	OsFBO1 - F-box and other domain containing protein, expressed
Grain_env2_r2	7	QTN-sf0102872850	1	-18	LOC_Os01g05980	receptor kinase, putative
Grain_env2_r2	7	QTN-sf0102872850	1	-6	LOC_Os01g06000	PPR repeat containing protein, expressed
Grain_env2_r2	7	QTN-sf0102872850	1	0	LOC_Os01g06010	Core histone H2A/H2B/H3/H4 domain containing protein, putative, expressed
Grain_env2_r2	7	QTN-sf0102872850	1	3	LOC_Os01g06020	aspartyl-tRNA synthetase, putative, expressed
Grain_env2_r2	7	QTN-sf0102872850	1	22	LOC_Os01g06060	gibberellin receptor GID1L2, putative, expressed
Grain_env2_r2	7	QTN-sf0102872850	1	80	LOC_Os01g06210	gibberellin receptor GID1L2, putative
Grain_env2_r2	7	QTN-sf0102872850	1	83	LOC_Os01g06220	gibberellin receptor GID1L2, putative, expressed
Grain_env2_r2	7	QTN-sf0102872850	1	87	LOC_Os01g06230	OsSAUR1 - Auxin-responsive SAUR gene family member
Grain_env2_r2	7	QTN-sf0102872850	1	88	LOC_Os01g06240	protein kinase, putative, expressed
Grain_env2_r2	7	QTN-sf0102872850	1	92	LOC_Os01g06250	dirigent, putative
Grain_env2_r2	7	QTN-sf0102872850	1	108	LOC_Os01g06280	TKL_IRAK_CrRLK1L-1.4 - The CrRLK1L-1 subfamily has homology to the CrRLK1L homolog, expressed
Grain_env2_r2	7	QTN-sf0102872850	1	111	LOC_Os01g06290	splicing factor, arginine/serine-rich, putative, expressed
Grain_env2_r2	7	QTN-sf0102872850	1	-116	LOC_Os01g05770	expressed protein
Grain_env2_r2	7	QTN-sf0102872850	1	-112	LOC_Os01g05780	expressed protein
Grain_env2_r2	7	QTN-sf0102872850	1	-77	LOC_Os01g05830	expressed protein
Grain_env2_r2	7	QTN-sf0102872850	1	-69	LOC_Os01g05850	conserved hypothetical protein
Grain_env2_r2	7	QTN-sf0102872850	1	11	LOC_Os01g06030	conserved hypothetical protein
Grain_env2_r2	7	QTN-sf0102872850	1	13	LOC_Os01g06040	conserved hypothetical protein
Grain_env2_r2	7	QTN-sf0102872850	1	19	LOC_Os01g06050	expressed protein
Grain_env2_r2	7	QTN-sf0102872850	1	25	LOC_Os01g06070	conserved hypothetical protein
Grain_env2_r2	7	QTN-sf0102872850	1	27	LOC_Os01g06080	conserved hypothetical protein
Grain_env2_r2	7	QTN-sf0102872850	1	33	LOC_Os01g06090	expressed protein
Grain_env2_r2	7	QTN-sf0102872850	1	36	LOC_Os01g06100	transposon protein, putative, unclassified
Grain_env2_r2	7	QTN-sf0102872850	1	39	LOC_Os01g06110	transposon protein, putative, unclassified
Grain_env2_r2	7	QTN-sf0102872850	1	46	LOC_Os01g06120	conserved hypothetical protein
Grain_env2_r2	7	QTN-sf0102872850	1	48	LOC_Os01g06130	expressed protein
Grain_env2_r2	7	QTN-sf0102872850	1	52	LOC_Os01g06140	expressed protein
Grain_env2_r2	7	QTN-sf0102872850	1	56	LOC_Os01g06150	expressed protein
Grain_env2_r2	7	QTN-sf0102872850	1	60	LOC_Os01g06160	retrotransposon protein, putative, Ty3-gypsy subclass
Grain_env2_r2	7	QTN-sf0102872850	1	67	LOC_Os01g06170	retrotransposon protein, putative, unclassified
Grain_env2_r2	7	QTN-sf0102872850	1	71	LOC_Os01g06180	retrotransposon protein, putative, unclassified
Grain_env2_r2	7	QTN-sf0102872850	1	76	LOC_Os01g06200	retrotransposon protein, putative, unclassified
Grain_env2_r2	7	QTN-sf0102872850	1	95	LOC_Os01g06260	hypothetical protein
Grain_env2_r2	7	QTN-sf0102872850	1	97	LOC_Os01g06270	expressed protein
Grain_BLUP	7	QTN-sf0103080437	1	-119	LOC_Os01g06230	OsSAUR1 - Auxin-responsive SAUR gene family member
Grain_BLUP	7	QTN-sf0103080437	1	-116	LOC_Os01g06240	protein kinase, putative, expressed
Grain_BLUP	7	QTN-sf0103080437	1	-114	LOC_Os01g06250	dirigent, putative
Grain_BLUP	7	QTN-sf0103080437	1	-110	LOC_Os01g06260	hypothetical protein
Grain_BLUP	7	QTN-sf0103080437	1	-102	LOC_Os01g06270	expressed protein
Grain_BLUP	7	QTN-sf0103080437	1	-94	LOC_Os01g06280	TKL_IRAK_CrRLK1L-1.4 - The CrRLK1L-1 subfamily has homology to the CrRLK1L homolog, expressed
Grain_BLUP	7	QTN-sf0103080437	1	-92	LOC_Os01g06290	splicing factor, arginine/serine-rich, putative, expressed
Grain_BLUP	7	QTN-sf0103080437	1	-84	LOC_Os01g06300	transposon protein, putative, unclassified
Grain_BLUP	7	QTN-sf0103080437	1	-80	LOC_Os01g06310	glycine-rich cell wall structural protein precursor, putative, expressed
Grain_BLUP	7	QTN-sf0103080437	1	-75	LOC_Os01g06320	MYB family transcription factor, putative, expressed
Grain_BLUP	7	QTN-sf0103080437	1	-69	LOC_Os01g06330	retrotransposon protein, putative, unclassified
Grain_BLUP	7	QTN-sf0103080437	1	-66	LOC_Os01g06340	expressed protein
Grain_BLUP	7	QTN-sf0103080437	1	-65	LOC_Os01g06350	hypothetical protein
Grain_BLUP	7	QTN-sf0103080437	1	-59	LOC_Os01g06360	transposon protein, putative, unclassified
Grain_BLUP	7	QTN-sf0103080437	1	-55	LOC_Os01g06370	hypothetical protein
Grain_BLUP	7	QTN-sf0103080437	1	-53	LOC_Os01g06380	hypothetical protein
Grain_BLUP	7	QTN-sf0103080437	1	-50	LOC_Os01g06390	hypothetical protein
Grain_BLUP	7	QTN-sf0103080437	1	-48	LOC_Os01g06400	expressed protein
Grain_BLUP	7	QTN-sf0103080437	1	-46	LOC_Os01g06410	hypothetical protein
Grain_BLUP	7	QTN-sf0103080437	1	-45	LOC_Os01g06420	hypothetical protein
Grain_BLUP	7	QTN-sf0103080437	1	-44	LOC_Os01g06430	expressed protein
Grain_BLUP	7	QTN-sf0103080437	1	-42	LOC_Os01g06440	expressed protein
Grain_BLUP	7	QTN-sf0103080437	1	-40	LOC_Os01g06450	glycosyltransferase family 43 protein, putative, expressed
Grain_BLUP	7	QTN-sf0103080437	1	-37	LOC_Os01g06454	heat shock protein DnaJ, putative, expressed
Grain_BLUP	7	QTN-sf0103080437	1	-34	LOC_Os01g06460	uncharacterized Cys-rich domain containing protein, putative, expressed
Grain_BLUP	7	QTN-sf0103080437	1	-29	LOC_Os01g06470	expressed protein
Grain_BLUP	7	QTN-sf0103080437	1	-24	LOC_Os01g06490	OsSCP1 - Putative Serine Carboxypeptidase homologue, expressed
Grain_BLUP	7	QTN-sf0103080437	1	-21	LOC_Os01g06500	PHLOEM 2-LIKE A5, putative, expressed
Grain_BLUP	7	QTN-sf0103080437	1	-15	LOC_Os01g06510	arginyl-tRNA synthetase, putative, expressed
Grain_BLUP	7	QTN-sf0103080437	1	-10	LOC_Os01g06520	verticillium wilt disease resistance protein, putative, expressed
Grain_BLUP	7	QTN-sf0103080437	1	1	LOC_Os01g06540	PHD finger protein, putative
Grain_BLUP	7	QTN-sf0103080437	1	3	LOC_Os01g06550	NF-X1-type zinc finger protein, putative, expressed
Grain_BLUP	7	QTN-sf0103080437	1	9	LOC_Os01g06560	transcription factor HBP-1b, putative, expressed
Grain_BLUP	7	QTN-sf0103080437	1	13	LOC_Os01g06570	hypothetical protein
Grain_BLUP	7	QTN-sf0103080437	1	15	LOC_Os01g06580	fasciclin domain containing protein, expressed
Grain_BLUP	7	QTN-sf0103080437	1	17	LOC_Os01g06590	zinc finger, C3HC4 type domain containing protein, expressed
Grain_BLUP	7	QTN-sf0103080437	1	26	LOC_Os01g06600	glutaryl-CoA dehydrogenase, mitochondrial precursor, putative, expressed
Grain_BLUP	7	QTN-sf0103080437	1	34	LOC_Os01g06610	retrotransposon protein, putative, Ty3-gypsy subclass
Grain_BLUP	7	QTN-sf0103080437	1	41	LOC_Os01g06620	expressed protein
Grain_BLUP	7	QTN-sf0103080437	1	42	LOC_Os01g06630	small hydrophilic plant seed protein, putative, expressed
Grain_BLUP	7	QTN-sf0103080437	1	47	LOC_Os01g06640	basic helix-loop-helix, putative, expressed
Grain_BLUP	7	QTN-sf0103080437	1	52	LOC_Os01g06650	retrotransposon protein, putative, unclassified
Grain_BLUP	7	QTN-sf0103080437	1	54	LOC_Os01g06660	thiamine pyrophosphate enzyme, C-terminal TPP binding domain containing protein, expressed
Grain_BLUP	7	QTN-sf0103080437	1	62	LOC_Os01g06670	hcr2-5D, putative, expressed
Grain_BLUP	7	QTN-sf0103080437	1	65	LOC_Os01g06680	retrotransposon protein, putative, unclassified, expressed
Grain_BLUP	7	QTN-sf0103080437	1	75	LOC_Os01g06690	retrotransposon protein, putative, unclassified
Grain_BLUP	7	QTN-sf0103080437	1	79	LOC_Os01g06700	retrotransposon protein, putative, unclassified
Grain_BLUP	7	QTN-sf0103080437	1	86	LOC_Os01g06710	retrotransposon protein, putative, unclassified
Grain_BLUP	7	QTN-sf0103080437	1	95	LOC_Os01g06720	disease resistance protein SlVe2 precursor, putative
Grain_BLUP	7	QTN-sf0103080437	1	100	LOC_Os01g06730	verticillium wilt disease resistance protein, putative, expressed
Grain_BLUP	7	QTN-sf0103080437	1	107	LOC_Os01g06740	ribosome inactivating protein, putative, expressed
Grain_BLUP	7	QTN-sf0103080437	1	115	LOC_Os01g06750	verticillium wilt disease resistance protein precursor, putative
Grain_env1_r1	8	QTN-sf0302508135	3	-118	LOC_Os03g04950	OsSub26 - Putative Subtilisin homologue, expressed
Grain_env1_r1	8	QTN-sf0302508135	3	-108	LOC_Os03g04960	cysteinyl-tRNA synthetase, putative, expressed
Grain_env1_r1	8	QTN-sf0302508135	3	-102	LOC_Os03g04970	T-complex protein, putative, expressed
Grain_env1_r1	8	QTN-sf0302508135	3	-95	LOC_Os03g04980	PHD-finger domain containing protein, putative, expressed
Grain_env1_r1	8	QTN-sf0302508135	3	-89	LOC_Os03g04990	expressed protein
Grain_env1_r1	8	QTN-sf0302508135	3	-84	LOC_Os03g05000	retrotransposon protein, putative, unclassified
Grain_env1_r1	8	QTN-sf0302508135	3	-80	LOC_Os03g05010	retrotransposon protein, putative, unclassified
Grain_env1_r1	8	QTN-sf0302508135	3	-59	LOC_Os03g05020	PIR, putative, expressed
Grain_env1_r1	8	QTN-sf0302508135	3	-58	LOC_Os03g05030	dirigent, putative, expressed
Grain_env1_r1	8	QTN-sf0302508135	3	-53	LOC_Os03g05040	expressed protein
Grain_env1_r1	8	QTN-sf0302508135	3	-46	LOC_Os03g05049	expressed protein
Grain_env1_r1	8	QTN-sf0302508135	3	-40	LOC_Os03g05060	exostosin family domain containing protein, expressed
Grain_env1_r1	8	QTN-sf0302508135	3	-36	LOC_Os03g05070	exostosin family domain containing protein, expressed
Grain_env1_r1	8	QTN-sf0302508135	3	-34	LOC_Os03g05080	hypothetical protein
Grain_env1_r1	8	QTN-sf0302508135	3	-29	LOC_Os03g05090	transposon protein, putative, unclassified
Grain_env1_r1	8	QTN-sf0302508135	3	-25	LOC_Os03g05100	expressed protein
Grain_env1_r1	8	QTN-sf0302508135	3	-19	LOC_Os03g05110	xyloglucan galactosyltransferase KATAMARI1, putative, expressed
Grain_env1_r1	8	QTN-sf0302508135	3	-16	LOC_Os03g05120	hypothetical protein
Grain_env1_r1	8	QTN-sf0302508135	3	-14	LOC_Os03g05130	hypothetical protein
Grain_env1_r1	8	QTN-sf0302508135	3	-10	LOC_Os03g05140	receptor-like protein kinase 2 precursor, putative
Grain_env1_r1	8	QTN-sf0302508135	3	-7	LOC_Os03g05150	hypothetical protein
Grain_env1_r1	8	QTN-sf0302508135	3	-1	LOC_Os03g05160	GATA zinc finger domain containing protein, expressed
Grain_env1_r1	8	QTN-sf0302508135	3	0	LOC_Os03g05170	hypothetical protein
Grain_env1_r1	8	QTN-sf0302508135	3	3	LOC_Os03g05180	expressed protein
Grain_env1_r1	8	QTN-sf0302508135	3	7	LOC_Os03g05200	DENN domain containing protein, expressed
Grain_env1_r1	8	QTN-sf0302508135	3	19	LOC_Os03g05210	WD domain, G-beta repeat domain containing protein, expressed
Grain_env1_r1	8	QTN-sf0302508135	3	21	LOC_Os03g05220	expressed protein
Grain_env1_r1	8	QTN-sf0302508135	3	25	LOC_Os03g05225	expressed protein
Grain_env1_r1	8	QTN-sf0302508135	3	29	LOC_Os03g05240	retrotransposon protein, putative, unclassified
Grain_env1_r1	8	QTN-sf0302508135	3	31	LOC_Os03g05250	hypothetical protein
Grain_env1_r1	8	QTN-sf0302508135	3	34	LOC_Os03g05260	ankyrin repeat domain containing protein, expressed
Grain_env1_r1	8	QTN-sf0302508135	3	39	LOC_Os03g05270	RING finger and CHY zinc finger domain-containing protein 1, putative, expressed
Grain_env1_r1	8	QTN-sf0302508135	3	44	LOC_Os03g05280	ras-related protein, putative, expressed
Grain_env1_r1	8	QTN-sf0302508135	3	53	LOC_Os03g05290	aquaporin protein, putative, expressed
Grain_env1_r1	8	QTN-sf0302508135	3	62	LOC_Os03g05300	cyclin-dependent kinases regulatory subunit 1, putative, expressed
Grain_env1_r1	8	QTN-sf0302508135	3	67	LOC_Os03g05310	pheophorbide a oxygenase, chloroplast precursor, putative, expressed
Grain_env1_r1	8	QTN-sf0302508135	3	72	LOC_Os03g05320	expressed protein
Grain_env1_r1	8	QTN-sf0302508135	3	83	LOC_Os03g05330	HEAT repeat family protein, putative, expressed
Grain_env1_r1	8	QTN-sf0302508135	3	99	LOC_Os03g05334	expressed protein
Grain_env1_r1	8	QTN-sf0302508135	3	100	LOC_Os03g05340	retrotransposon protein, putative, unclassified, expressed
Grain_env1_r1	8	QTN-sf0302508135	3	110	LOC_Os03g05350	retrotransposon protein, putative, unclassified
Grain_env1_r2	8	QTN-sf0301648936	3	-118	LOC_Os03g03540	no apical meristem protein, putative, expressed
Grain_env1_r2	8	QTN-sf0301648936	3	-96	LOC_Os03g03550	bZIP family transcription factor, putative, expressed
Grain_env1_r2	8	QTN-sf0301648936	3	-40	LOC_Os03g03630	expressed protein
Grain_env1_r2	8	QTN-sf0301648936	3	-38	LOC_Os03g03640	expressed protein
Grain_env1_r2	8	QTN-sf0301648936	3	-29	LOC_Os03g03654	hypothetical protein
Grain_env1_r2	8	QTN-sf0301648936	3	-18	LOC_Os03g03670	expressed protein
Grain_env1_r2	8	QTN-sf0301648936	3	-90	LOC_Os03g03560	FHA domain containing protein, putative, expressed
Grain_env1_r2	8	QTN-sf0301648936	3	17	LOC_Os03g03724	expressed protein
Grain_env1_r2	8	QTN-sf0301648936	3	19	LOC_Os03g03740	retrotransposon protein, putative, unclassified
Grain_env1_r2	8	QTN-sf0301648936	3	21	LOC_Os03g03750	hypothetical protein
Grain_env1_r2	8	QTN-sf0301648936	3	35	LOC_Os03g03770	expressed protein
Grain_env1_r2	8	QTN-sf0301648936	3	61	LOC_Os03g03800	hypothetical protein
Grain_env1_r2	8	QTN-sf0301648936	3	-83	LOC_Os03g03570	leucine-rich repeat transmembrane protein kinase, putative, expressed
Grain_env1_r2	8	QTN-sf0301648936	3	80	LOC_Os03g03840	hypothetical protein
Grain_env1_r2	8	QTN-sf0301648936	3	87	LOC_Os03g03860	expressed protein
Grain_env1_r2	8	QTN-sf0301648936	3	-77	LOC_Os03g03590	transporter, monovalent cation:proton antiporter-2 family, putative, expressed
Grain_env1_r2	8	QTN-sf0301648936	3	-69	LOC_Os03g03600	fasciclin-like arabinogalactan protein, putative, expressed
Grain_env1_r2	8	QTN-sf0301648936	3	-47	LOC_Os03g03610	1,3-beta-glucan synthase component domain containing protein, expressed
Grain_env1_r2	8	QTN-sf0301648936	3	-33	LOC_Os03g03650	POLD2 - Putative DNA polymerase delta complex subunit, expressed
Grain_env1_r2	8	QTN-sf0301648936	3	-20	LOC_Os03g03660	CAMK_CAMK_like.17 - CAMK includes calcium/calmodulin depedent protein kinases, expressed
Grain_env1_r2	8	QTN-sf0301648936	3	-11	LOC_Os03g03680	transporter family protein, putative, expressed
Grain_env1_r2	8	QTN-sf0301648936	3	-3	LOC_Os03g03690	glycosylphosphatidylinositol anchor biosynthesis protein 11, putative, expressed
Grain_env1_r2	8	QTN-sf0301648936	3	-1	LOC_Os03g03700	MLO domain containing protein, putative, expressed
Grain_env1_r2	8	QTN-sf0301648936	3	3	LOC_Os03g03710	ribonuclease protein, putative, expressed
Grain_env1_r2	8	QTN-sf0301648936	3	12	LOC_Os03g03720	glyceraldehyde-3-phosphate dehydrogenase, putative, expressed
Grain_env1_r2	8	QTN-sf0301648936	3	18	LOC_Os03g03730	regulatory protein, putative, expressed
Grain_env1_r2	8	QTN-sf0301648936	3	22	LOC_Os03g03760	MYB family transcription factor, putative, expressed
Grain_env1_r2	8	QTN-sf0301648936	3	56	LOC_Os03g03790	AMP-binding domain containing protein, expressed
Grain_env1_r2	8	QTN-sf0301648936	3	64	LOC_Os03g03810	DEF8 - Defensin and Defensin-like DEFL family, expressed
Grain_env1_r2	8	QTN-sf0301648936	3	66	LOC_Os03g03820	adenylate kinase, putative, expressed
Grain_env1_r2	8	QTN-sf0301648936	3	70	LOC_Os03g03830	EF hand family protein, putative, expressed
Grain_env1_r2	8	QTN-sf0301648936	3	83	LOC_Os03g03850	GATA zinc finger domain containing protein
Grain_env1_r2	8	QTN-sf0301648936	3	102	LOC_Os03g03870	DNA-binding bromodomain-containing protein, putative, expressed
Grain_env1_r2	8	QTN-sf0301648936	3	115	LOC_Os03g03880	protein kinase, putative, expressed
Grain_env2_r1	8	QTN-sf0208262336	2	-93	LOC_Os02g14760	CID11, putative, expressed
Grain_env2_r1	8	QTN-sf0208262336	2	-78	LOC_Os02g14770	phosphoenolpyruvate carboxylase, putative, expressed
Grain_env2_r1	8	QTN-sf0208262336	2	-61	LOC_Os02g14780	splicing factor 3 subunit 1, putative, expressed
Grain_env2_r1	8	QTN-sf0208262336	2	-55	LOC_Os02g14790	WD domain, G-beta repeat domain containing protein, expressed
Grain_env2_r1	8	QTN-sf0208262336	2	-13	LOC_Os02g14840	potassium channel KAT1, putative, expressed
Grain_env2_r1	8	QTN-sf0208262336	2	0	LOC_Os02g14860	prefoldin subunit, putative, expressed
Grain_env2_r1	8	QTN-sf0208262336	2	37	LOC_Os02g14900	1,3-beta-glucan synthase component domain containing protein, expressed
Grain_env2_r1	8	QTN-sf0208262336	2	61	LOC_Os02g14910	bZIP transcription factor family protein, putative, expressed
Grain_env2_r1	8	QTN-sf0208262336	2	-110	LOC_Os02g14740	hypothetical protein
Grain_env2_r1	8	QTN-sf0208262336	2	-103	LOC_Os02g14750	hypothetical protein
Grain_env2_r1	8	QTN-sf0208262336	2	-38	LOC_Os02g14800	expressed protein
Grain_env2_r1	8	QTN-sf0208262336	2	-31	LOC_Os02g14810	conserved hypothetical protein
Grain_env2_r1	8	QTN-sf0208262336	2	-27	LOC_Os02g14820	hypothetical protein
Grain_env2_r1	8	QTN-sf0208262336	2	-19	LOC_Os02g14830	hypothetical protein
Grain_env2_r1	8	QTN-sf0208262336	2	-4	LOC_Os02g14850	expressed protein
Grain_env2_r1	8	QTN-sf0208262336	2	0	LOC_Os02g14855	conserved hypothetical protein
Grain_env2_r1	8	QTN-sf0208262336	2	5	LOC_Os02g14870	conserved hypothetical protein
Grain_env2_r1	8	QTN-sf0208262336	2	14	LOC_Os02g14874	expressed protein
Grain_env2_r1	8	QTN-sf0208262336	2	26	LOC_Os02g14880	hypothetical protein
Grain_env2_r1	8	QTN-sf0208262336	2	30	LOC_Os02g14890	expressed protein
Grain_env2_r1	8	QTN-sf0208262336	2	87	LOC_Os02g14970	hypothetical protein
Grain_env2_r1	8	QTN-sf0208262336	2	63	LOC_Os02g14929	T-complex protein, putative, expressed
Grain_env2_r1	8	QTN-sf0208262336	2	96	LOC_Os02g14980	calcium-binding EF hand family protein, putative, expressed
Grain_env2_r1	8	QTN-sf0208262336	2	100	LOC_Os02g14990	zinc finger, C3HC4 type domain containing protein, expressed
Grain_env2_r1	8	QTN-sf0208262336	2	104	LOC_Os02g15000	zinc finger, C3HC4 type domain containing protein, expressed
Grain_env2_r1	8	QTN-sf0208262336	2	113	LOC_Os02g15010	zinc finger, C3HC4 type domain containing protein, expressed
Grain_env2_r1	8	QTN-sf0208262336	2	118	LOC_Os02g15020	zinc finger, C3HC4 type domain containing protein
Grain_env2_r2	8	QTN-sf0224317863	2	-94	LOC_Os02g40020	hypothetical protein
Grain_env2_r2	8	QTN-sf0224317863	2	-81	LOC_Os02g40040	expressed protein
Grain_env2_r2	8	QTN-sf0224317863	2	-68	LOC_Os02g40050	retrotransposon protein, putative, unclassified
Grain_env2_r2	8	QTN-sf0224317863	2	-66	LOC_Os02g40060	retrotransposon protein, putative, unclassified
Grain_env2_r2	8	QTN-sf0224317863	2	-38	LOC_Os02g40110	expressed protein
Grain_env2_r2	8	QTN-sf0224317863	2	-34	LOC_Os02g40120	hypothetical protein
Grain_env2_r2	8	QTN-sf0224317863	2	-21	LOC_Os02g40140	transposon protein, putative, unclassified
Grain_env2_r2	8	QTN-sf0224317863	2	-17	LOC_Os02g40150	retrotransposon protein, putative, unclassified
Grain_env2_r2	8	QTN-sf0224317863	2	-15	LOC_Os02g40160	retrotransposon protein, putative, unclassified
Grain_env2_r2	8	QTN-sf0224317863	2	-11	LOC_Os02g40170	retrotransposon protein, putative, unclassified
Grain_env2_r2	8	QTN-sf0224317863	2	8	LOC_Os02g40210	hypothetical protein
Grain_env2_r2	8	QTN-sf0224317863	2	9	LOC_Os02g40220	retrotransposon protein, putative, Ty1-copia subclass
Grain_env2_r2	8	QTN-sf0224317863	2	11	LOC_Os02g40230	retrotransposon protein, putative, Ty1-copia subclass
Grain_env2_r2	8	QTN-sf0224317863	2	37	LOC_Os02g40250	retrotransposon protein, putative, unclassified
Grain_env2_r2	8	QTN-sf0224317863	2	57	LOC_Os02g40270	expressed protein
Grain_env2_r2	8	QTN-sf0224317863	2	73	LOC_Os02g40300	retrotransposon protein, putative, unclassified
Grain_env2_r2	8	QTN-sf0224317863	2	76	LOC_Os02g40310	retrotransposon protein, putative, unclassified
Grain_env2_r2	8	QTN-sf0224317863	2	85	LOC_Os02g40330	retrotransposon protein, putative, Ty3-gypsy subclass, expressed
Grain_env2_r2	8	QTN-sf0224317863	2	108	LOC_Os02g40340	expressed protein
Grain_env2_r2	8	QTN-sf0224317863	2	112	LOC_Os02g40350	transposon protein, putative, unclassified
Grain_env2_r2	8	QTN-sf0224317863	2	-94	LOC_Os02g40010	phosphoribosyl transferase, putative, expressed
Grain_env2_r2	8	QTN-sf0224317863	2	-83	LOC_Os02g40030	transporter family protein, putative, expressed
Grain_env2_r2	8	QTN-sf0224317863	2	-57	LOC_Os02g40070	AP2-like ethylene-responsive transcription factor PLETHORA 2, putative, expressed
Grain_env2_r2	8	QTN-sf0224317863	2	-53	LOC_Os02g40080	tic20, putative, expressed
Grain_env2_r2	8	QTN-sf0224317863	2	-50	LOC_Os02g40090	transporter-related, putative, expressed
Grain_env2_r2	8	QTN-sf0224317863	2	-42	LOC_Os02g40100	plant protein of unknown function DUF869 domain containing protein, expressed
Grain_env2_r2	8	QTN-sf0224317863	2	-29	LOC_Os02g40130	leucine-rich, putative, expressed
Grain_env2_r2	8	QTN-sf0224317863	2	-4	LOC_Os02g40180	receptor-like protein kinase 5 precursor, putative, expressed
Grain_env2_r2	8	QTN-sf0224317863	2	3	LOC_Os02g40200	receptor-like protein kinase precursor, putative, expressed
Grain_env2_r2	8	QTN-sf0224317863	2	26	LOC_Os02g40240	receptor kinase, putative, expressed
Grain_env2_r2	8	QTN-sf0224317863	2	49	LOC_Os02g40260	uncharacterized protein At4g06744 precursor, putative, expressed
Grain_env2_r2	8	QTN-sf0224317863	2	66	LOC_Os02g40280	piwi domain containing protein, putative, expressed
Grain_env2_r2	8	QTN-sf0224317863	2	79	LOC_Os02g40320	PINHEAD, putative
Grain_BLUP	8	QTN-sf0103080454	1	-119	LOC_Os01g06230	OsSAUR1 - Auxin-responsive SAUR gene family member
Grain_BLUP	8	QTN-sf0103080454	1	-116	LOC_Os01g06240	protein kinase, putative, expressed
Grain_BLUP	8	QTN-sf0103080454	1	-114	LOC_Os01g06250	dirigent, putative
Grain_BLUP	8	QTN-sf0103080454	1	-110	LOC_Os01g06260	hypothetical protein
Grain_BLUP	8	QTN-sf0103080454	1	-102	LOC_Os01g06270	expressed protein
Grain_BLUP	8	QTN-sf0103080454	1	-94	LOC_Os01g06280	TKL_IRAK_CrRLK1L-1.4 - The CrRLK1L-1 subfamily has homology to the CrRLK1L homolog, expressed
Grain_BLUP	8	QTN-sf0103080454	1	-92	LOC_Os01g06290	splicing factor, arginine/serine-rich, putative, expressed
Grain_BLUP	8	QTN-sf0103080454	1	-84	LOC_Os01g06300	transposon protein, putative, unclassified
Grain_BLUP	8	QTN-sf0103080454	1	-80	LOC_Os01g06310	glycine-rich cell wall structural protein precursor, putative, expressed
Grain_BLUP	8	QTN-sf0103080454	1	-75	LOC_Os01g06320	MYB family transcription factor, putative, expressed
Grain_BLUP	8	QTN-sf0103080454	1	-69	LOC_Os01g06330	retrotransposon protein, putative, unclassified
Grain_BLUP	8	QTN-sf0103080454	1	-66	LOC_Os01g06340	expressed protein
Grain_BLUP	8	QTN-sf0103080454	1	-65	LOC_Os01g06350	hypothetical protein
Grain_BLUP	8	QTN-sf0103080454	1	-59	LOC_Os01g06360	transposon protein, putative, unclassified
Grain_BLUP	8	QTN-sf0103080454	1	-55	LOC_Os01g06370	hypothetical protein
Grain_BLUP	8	QTN-sf0103080454	1	-53	LOC_Os01g06380	hypothetical protein
Grain_BLUP	8	QTN-sf0103080454	1	-50	LOC_Os01g06390	hypothetical protein
Grain_BLUP	8	QTN-sf0103080454	1	-48	LOC_Os01g06400	expressed protein
Grain_BLUP	8	QTN-sf0103080454	1	-46	LOC_Os01g06410	hypothetical protein
Grain_BLUP	8	QTN-sf0103080454	1	-45	LOC_Os01g06420	hypothetical protein
Grain_BLUP	8	QTN-sf0103080454	1	-44	LOC_Os01g06430	expressed protein
Grain_BLUP	8	QTN-sf0103080454	1	-42	LOC_Os01g06440	expressed protein
Grain_BLUP	8	QTN-sf0103080454	1	-40	LOC_Os01g06450	glycosyltransferase family 43 protein, putative, expressed
Grain_BLUP	8	QTN-sf0103080454	1	-37	LOC_Os01g06454	heat shock protein DnaJ, putative, expressed
Grain_BLUP	8	QTN-sf0103080454	1	-34	LOC_Os01g06460	uncharacterized Cys-rich domain containing protein, putative, expressed
Grain_BLUP	8	QTN-sf0103080454	1	-29	LOC_Os01g06470	expressed protein
Grain_BLUP	8	QTN-sf0103080454	1	-24	LOC_Os01g06490	OsSCP1 - Putative Serine Carboxypeptidase homologue, expressed
Grain_BLUP	8	QTN-sf0103080454	1	-21	LOC_Os01g06500	PHLOEM 2-LIKE A5, putative, expressed
Grain_BLUP	8	QTN-sf0103080454	1	-15	LOC_Os01g06510	arginyl-tRNA synthetase, putative, expressed
Grain_BLUP	8	QTN-sf0103080454	1	-10	LOC_Os01g06520	verticillium wilt disease resistance protein, putative, expressed
Grain_BLUP	8	QTN-sf0103080454	1	1	LOC_Os01g06540	PHD finger protein, putative
Grain_BLUP	8	QTN-sf0103080454	1	3	LOC_Os01g06550	NF-X1-type zinc finger protein, putative, expressed
Grain_BLUP	8	QTN-sf0103080454	1	9	LOC_Os01g06560	transcription factor HBP-1b, putative, expressed
Grain_BLUP	8	QTN-sf0103080454	1	13	LOC_Os01g06570	hypothetical protein
Grain_BLUP	8	QTN-sf0103080454	1	15	LOC_Os01g06580	fasciclin domain containing protein, expressed
Grain_BLUP	8	QTN-sf0103080454	1	17	LOC_Os01g06590	zinc finger, C3HC4 type domain containing protein, expressed
Grain_BLUP	8	QTN-sf0103080454	1	26	LOC_Os01g06600	glutaryl-CoA dehydrogenase, mitochondrial precursor, putative, expressed
Grain_BLUP	8	QTN-sf0103080454	1	34	LOC_Os01g06610	retrotransposon protein, putative, Ty3-gypsy subclass
Grain_BLUP	8	QTN-sf0103080454	1	41	LOC_Os01g06620	expressed protein
Grain_BLUP	8	QTN-sf0103080454	1	42	LOC_Os01g06630	small hydrophilic plant seed protein, putative, expressed
Grain_BLUP	8	QTN-sf0103080454	1	47	LOC_Os01g06640	basic helix-loop-helix, putative, expressed
Grain_BLUP	8	QTN-sf0103080454	1	52	LOC_Os01g06650	retrotransposon protein, putative, unclassified
Grain_BLUP	8	QTN-sf0103080454	1	54	LOC_Os01g06660	thiamine pyrophosphate enzyme, C-terminal TPP binding domain containing protein, expressed
Grain_BLUP	8	QTN-sf0103080454	1	62	LOC_Os01g06670	hcr2-5D, putative, expressed
Grain_BLUP	8	QTN-sf0103080454	1	65	LOC_Os01g06680	retrotransposon protein, putative, unclassified, expressed
Grain_BLUP	8	QTN-sf0103080454	1	75	LOC_Os01g06690	retrotransposon protein, putative, unclassified
Grain_BLUP	8	QTN-sf0103080454	1	79	LOC_Os01g06700	retrotransposon protein, putative, unclassified
Grain_BLUP	8	QTN-sf0103080454	1	86	LOC_Os01g06710	retrotransposon protein, putative, unclassified
Grain_BLUP	8	QTN-sf0103080454	1	95	LOC_Os01g06720	disease resistance protein SlVe2 precursor, putative
Grain_BLUP	8	QTN-sf0103080454	1	100	LOC_Os01g06730	verticillium wilt disease resistance protein, putative, expressed
Grain_BLUP	8	QTN-sf0103080454	1	107	LOC_Os01g06740	ribosome inactivating protein, putative, expressed
Grain_BLUP	8	QTN-sf0103080454	1	115	LOC_Os01g06750	verticillium wilt disease resistance protein precursor, putative
Grain_env1_r1	9	QTN-sf0316353176	3	-115	LOC_Os03g28220	transposon protein, putative, unclassified
Grain_env1_r1	9	QTN-sf0316353176	3	-112	LOC_Os03g28230	transposon protein, putative, unclassified
Grain_env1_r1	9	QTN-sf0316353176	3	-107	LOC_Os03g28250	hypothetical protein
Grain_env1_r1	9	QTN-sf0316353176	3	-101	LOC_Os03g28260	retrotransposon protein, putative, unclassified
Grain_env1_r1	9	QTN-sf0316353176	3	-89	LOC_Os03g28270	Leucine Rich Repeat family protein, expressed
Grain_env1_r1	9	QTN-sf0316353176	3	-84	LOC_Os03g28280	conserved hypothetical protein
Grain_env1_r1	9	QTN-sf0316353176	3	-72	LOC_Os03g28289	conserved hypothetical protein
Grain_env1_r1	9	QTN-sf0316353176	3	-64	LOC_Os03g28300	protein kinase domain containing protein, expressed
Grain_env1_r1	9	QTN-sf0316353176	3	-57	LOC_Os03g28310	dnaJ domain containing protein, expressed
Grain_env1_r1	9	QTN-sf0316353176	3	-46	LOC_Os03g28330	sucrose synthase, putative, expressed
Grain_env1_r1	9	QTN-sf0316353176	3	-22	LOC_Os03g28350	hypothetical protein
Grain_env1_r1	9	QTN-sf0316353176	3	-15	LOC_Os03g28360	hypothetical protein
Grain_env1_r1	9	QTN-sf0316353176	3	-2	LOC_Os03g28370	retrotransposon protein, putative, unclassified
Grain_env1_r1	9	QTN-sf0316353176	3	4	LOC_Os03g28389	expressed protein
Grain_env1_r1	9	QTN-sf0316353176	3	4	LOC_Os03g28400	transport protein particle component, Bet3, domain containing protein, expressed
Grain_env1_r1	9	QTN-sf0316353176	3	9	LOC_Os03g28410	ribosomal protein S2, putative
Grain_env1_r1	9	QTN-sf0316353176	3	17	LOC_Os03g28420	3-oxoacyl-synthase, putative, expressed
Grain_env1_r1	9	QTN-sf0316353176	3	25	LOC_Os03g28430	hypothetical protein
Grain_env1_r1	9	QTN-sf0316353176	3	42	LOC_Os03g28910	hypothetical protein
Grain_env1_r1	9	QTN-sf0316353176	3	46	LOC_Os03g28920	conserved hypothetical protein
Grain_env1_r1	9	QTN-sf0316353176	3	47	LOC_Os03g28930	transposon protein, putative, Mutator sub-class
Grain_env1_r1	9	QTN-sf0316353176	3	53	LOC_Os03g28940	ZIM domain containing protein, putative, expressed
Grain_env1_r1	9	QTN-sf0316353176	3	62	LOC_Os03g28950	transposon protein, putative, unclassified
Grain_env1_r1	9	QTN-sf0316353176	3	66	LOC_Os03g28960	DNA-directed RNA polymerase subunit, putative, expressed
Grain_env1_r1	9	QTN-sf0316353176	3	89	LOC_Os03g28969	hypothetical protein
Grain_env1_r1	9	QTN-sf0316353176	3	94	LOC_Os03g28980	WD40-like Beta Propeller Repeat family protein, expressed
Grain_env1_r1	9	QTN-sf0316353176	3	102	LOC_Os03g28990	zinc finger family protein, putative, expressed
Grain_env1_r1	9	QTN-sf0316353176	3	106	LOC_Os03g29000	hypothetical protein
Grain_env1_r1	9	QTN-sf0316353176	3	111	LOC_Os03g29010	transposon protein, putative, CACTA, En/Spm sub-class
Grain_env1_r1	9	QTN-sf0316353176	3	117	LOC_Os03g29020	transposon protein, putative, CACTA, En/Spm sub-class
Grain_env1_r2	9	QTN-sf0301664705	3	-111	LOC_Os03g03550	bZIP family transcription factor, putative, expressed
Grain_env1_r2	9	QTN-sf0301664705	3	-106	LOC_Os03g03560	FHA domain containing protein, putative, expressed
Grain_env1_r2	9	QTN-sf0301664705	3	-98	LOC_Os03g03570	leucine-rich repeat transmembrane protein kinase, putative, expressed
Grain_env1_r2	9	QTN-sf0301664705	3	-93	LOC_Os03g03590	transporter, monovalent cation:proton antiporter-2 family, putative, expressed
Grain_env1_r2	9	QTN-sf0301664705	3	-56	LOC_Os03g03630	expressed protein
Grain_env1_r2	9	QTN-sf0301664705	3	-53	LOC_Os03g03640	expressed protein
Grain_env1_r2	9	QTN-sf0301664705	3	-45	LOC_Os03g03654	hypothetical protein
Grain_env1_r2	9	QTN-sf0301664705	3	-33	LOC_Os03g03670	expressed protein
Grain_env1_r2	9	QTN-sf0301664705	3	-84	LOC_Os03g03600	fasciclin-like arabinogalactan protein, putative, expressed
Grain_env1_r2	9	QTN-sf0301664705	3	1	LOC_Os03g03724	expressed protein
Grain_env1_r2	9	QTN-sf0301664705	3	4	LOC_Os03g03740	retrotransposon protein, putative, unclassified
Grain_env1_r2	9	QTN-sf0301664705	3	5	LOC_Os03g03750	hypothetical protein
Grain_env1_r2	9	QTN-sf0301664705	3	19	LOC_Os03g03770	expressed protein
Grain_env1_r2	9	QTN-sf0301664705	3	45	LOC_Os03g03800	hypothetical protein
Grain_env1_r2	9	QTN-sf0301664705	3	64	LOC_Os03g03840	hypothetical protein
Grain_env1_r2	9	QTN-sf0301664705	3	-63	LOC_Os03g03610	1,3-beta-glucan synthase component domain containing protein, expressed
Grain_env1_r2	9	QTN-sf0301664705	3	71	LOC_Os03g03860	expressed protein
Grain_env1_r2	9	QTN-sf0301664705	3	-49	LOC_Os03g03650	POLD2 - Putative DNA polymerase delta complex subunit, expressed
Grain_env1_r2	9	QTN-sf0301664705	3	-36	LOC_Os03g03660	CAMK_CAMK_like.17 - CAMK includes calcium/calmodulin depedent protein kinases, expressed
Grain_env1_r2	9	QTN-sf0301664705	3	-27	LOC_Os03g03680	transporter family protein, putative, expressed
Grain_env1_r2	9	QTN-sf0301664705	3	-19	LOC_Os03g03690	glycosylphosphatidylinositol anchor biosynthesis protein 11, putative, expressed
Grain_env1_r2	9	QTN-sf0301664705	3	-16	LOC_Os03g03700	MLO domain containing protein, putative, expressed
Grain_env1_r2	9	QTN-sf0301664705	3	-4	LOC_Os03g03710	ribonuclease protein, putative, expressed
Grain_env1_r2	9	QTN-sf0301664705	3	0	LOC_Os03g03720	glyceraldehyde-3-phosphate dehydrogenase, putative, expressed
Grain_env1_r2	9	QTN-sf0301664705	3	2	LOC_Os03g03730	regulatory protein, putative, expressed
Grain_env1_r2	9	QTN-sf0301664705	3	7	LOC_Os03g03760	MYB family transcription factor, putative, expressed
Grain_env1_r2	9	QTN-sf0301664705	3	40	LOC_Os03g03790	AMP-binding domain containing protein, expressed
Grain_env1_r2	9	QTN-sf0301664705	3	48	LOC_Os03g03810	DEF8 - Defensin and Defensin-like DEFL family, expressed
Grain_env1_r2	9	QTN-sf0301664705	3	50	LOC_Os03g03820	adenylate kinase, putative, expressed
Grain_env1_r2	9	QTN-sf0301664705	3	54	LOC_Os03g03830	EF hand family protein, putative, expressed
Grain_env1_r2	9	QTN-sf0301664705	3	67	LOC_Os03g03850	GATA zinc finger domain containing protein
Grain_env1_r2	9	QTN-sf0301664705	3	86	LOC_Os03g03870	DNA-binding bromodomain-containing protein, putative, expressed
Grain_env1_r2	9	QTN-sf0301664705	3	99	LOC_Os03g03880	protein kinase, putative, expressed
Grain_env1_r2	9	QTN-sf0301664705	3	107	LOC_Os03g03890	protein kinase family protein, putative, expressed
Grain_env1_r2	9	QTN-sf0301664705	3	110	LOC_Os03g03900	NIN, putative, expressed
Grain_env2_r1	9	QTN-sf0208262344	2	-93	LOC_Os02g14760	CID11, putative, expressed
Grain_env2_r1	9	QTN-sf0208262344	2	-78	LOC_Os02g14770	phosphoenolpyruvate carboxylase, putative, expressed
Grain_env2_r1	9	QTN-sf0208262344	2	-61	LOC_Os02g14780	splicing factor 3 subunit 1, putative, expressed
Grain_env2_r1	9	QTN-sf0208262344	2	-55	LOC_Os02g14790	WD domain, G-beta repeat domain containing protein, expressed
Grain_env2_r1	9	QTN-sf0208262344	2	-13	LOC_Os02g14840	potassium channel KAT1, putative, expressed
Grain_env2_r1	9	QTN-sf0208262344	2	0	LOC_Os02g14860	prefoldin subunit, putative, expressed
Grain_env2_r1	9	QTN-sf0208262344	2	37	LOC_Os02g14900	1,3-beta-glucan synthase component domain containing protein, expressed
Grain_env2_r1	9	QTN-sf0208262344	2	61	LOC_Os02g14910	bZIP transcription factor family protein, putative, expressed
Grain_env2_r1	9	QTN-sf0208262344	2	-110	LOC_Os02g14740	hypothetical protein
Grain_env2_r1	9	QTN-sf0208262344	2	-103	LOC_Os02g14750	hypothetical protein
Grain_env2_r1	9	QTN-sf0208262344	2	63	LOC_Os02g14929	T-complex protein, putative, expressed
Grain_env2_r1	9	QTN-sf0208262344	2	-38	LOC_Os02g14800	expressed protein
Grain_env2_r1	9	QTN-sf0208262344	2	-31	LOC_Os02g14810	conserved hypothetical protein
Grain_env2_r1	9	QTN-sf0208262344	2	-27	LOC_Os02g14820	hypothetical protein
Grain_env2_r1	9	QTN-sf0208262344	2	-19	LOC_Os02g14830	hypothetical protein
Grain_env2_r1	9	QTN-sf0208262344	2	-4	LOC_Os02g14850	expressed protein
Grain_env2_r1	9	QTN-sf0208262344	2	0	LOC_Os02g14855	conserved hypothetical protein
Grain_env2_r1	9	QTN-sf0208262344	2	5	LOC_Os02g14870	conserved hypothetical protein
Grain_env2_r1	9	QTN-sf0208262344	2	14	LOC_Os02g14874	expressed protein
Grain_env2_r1	9	QTN-sf0208262344	2	26	LOC_Os02g14880	hypothetical protein
Grain_env2_r1	9	QTN-sf0208262344	2	30	LOC_Os02g14890	expressed protein
Grain_env2_r1	9	QTN-sf0208262344	2	87	LOC_Os02g14970	hypothetical protein
Grain_env2_r1	9	QTN-sf0208262344	2	96	LOC_Os02g14980	calcium-binding EF hand family protein, putative, expressed
Grain_env2_r1	9	QTN-sf0208262344	2	100	LOC_Os02g14990	zinc finger, C3HC4 type domain containing protein, expressed
Grain_env2_r1	9	QTN-sf0208262344	2	104	LOC_Os02g15000	zinc finger, C3HC4 type domain containing protein, expressed
Grain_env2_r1	9	QTN-sf0208262344	2	112	LOC_Os02g15010	zinc finger, C3HC4 type domain containing protein, expressed
Grain_env2_r1	9	QTN-sf0208262344	2	118	LOC_Os02g15020	zinc finger, C3HC4 type domain containing protein
Grain_env2_r2	9	QTN-sf0204186350	2	-108	LOC_Os02g07780	OsSPL4 - SBP-box gene family member, expressed
Grain_env2_r2	9	QTN-sf0204186350	2	-104	LOC_Os02g07790	serine/threonine-protein kinase HT1, putative, expressed
Grain_env2_r2	9	QTN-sf0204186350	2	-100	LOC_Os02g07800	transcription factor, putative, expressed
Grain_env2_r2	9	QTN-sf0204186350	2	-97	LOC_Os02g07810	inactive receptor kinase At2g26730 precursor, putative, expressed
Grain_env2_r2	9	QTN-sf0204186350	2	-88	LOC_Os02g07820	DUF581 domain containing protein, expressed
Grain_env2_r2	9	QTN-sf0204186350	2	-80	LOC_Os02g07830	OsHKT1;3 - Na+ transporter, expressed
Grain_env2_r2	9	QTN-sf0204186350	2	-73	LOC_Os02g07840	bZIP transcription factor domain containing protein, expressed
Grain_env2_r2	9	QTN-sf0204186350	2	-70	LOC_Os02g07850	DUF630/DUF632 domains containing protein, putative
Grain_env2_r2	9	QTN-sf0204186350	2	-58	LOC_Os02g07870	ATP synthase, putative, expressed
Grain_env2_r2	9	QTN-sf0204186350	2	-52	LOC_Os02g07880	DNA binding protein, putative, expressed
Grain_env2_r2	9	QTN-sf0204186350	2	-50	LOC_Os02g07890	60S ribosomal protein L27a-3, putative, expressed
Grain_env2_r2	9	QTN-sf0204186350	2	-45	LOC_Os02g07900	ANTH/ENTH domain containing protein, putative, expressed
Grain_env2_r2	9	QTN-sf0204186350	2	-42	LOC_Os02g07910	fiber protein Fb15, putative, expressed
Grain_env2_r2	9	QTN-sf0204186350	2	-35	LOC_Os02g07930	B-box zinc finger family protein, putative, expressed
Grain_env2_r2	9	QTN-sf0204186350	2	-11	LOC_Os02g07960	STRUBBELIG-RECEPTOR FAMILY 3 precursor, putative, expressed
Grain_env2_r2	9	QTN-sf0204186350	2	9	LOC_Os02g08010	LTPL43 - Protease inhibitor/seed storage/LTP family protein precursor, putative, expressed
Grain_env2_r2	9	QTN-sf0204186350	2	17	LOC_Os02g08018	calcium-transporting ATPase 9, plasma membrane-type, putative
Grain_env2_r2	9	QTN-sf0204186350	2	34	LOC_Os02g08030	aldose 1-epimerase, putative
Grain_env2_r2	9	QTN-sf0204186350	2	61	LOC_Os02g08070	OsSPL5 - SBP-box gene family member, expressed
Grain_env2_r2	9	QTN-sf0204186350	2	84	LOC_Os02g08090	LSM domain containing protein, expressed
Grain_env2_r2	9	QTN-sf0204186350	2	94	LOC_Os02g08100	AMP-binding domain containing protein, expressed
Grain_env2_r2	9	QTN-sf0204186350	2	-67	LOC_Os02g07860	conserved hypothetical protein
Grain_env2_r2	9	QTN-sf0204186350	2	100	LOC_Os02g08110	membrane associated DUF588 domain containing protein, putative, expressed
Grain_env2_r2	9	QTN-sf0204186350	2	106	LOC_Os02g08120	calmodulin binding protein, putative, expressed
Grain_env2_r2	9	QTN-sf0204186350	2	-39	LOC_Os02g07920	expressed protein
Grain_env2_r2	9	QTN-sf0204186350	2	-27	LOC_Os02g07940	retrotransposon protein, putative, unclassified
Grain_env2_r2	9	QTN-sf0204186350	2	-26	LOC_Os02g07950	retrotransposon protein, putative, unclassified
Grain_env2_r2	9	QTN-sf0204186350	2	-4	LOC_Os02g07970	hypothetical protein
Grain_env2_r2	9	QTN-sf0204186350	2	0	LOC_Os02g07980	expressed protein
Grain_env2_r2	9	QTN-sf0204186350	2	3	LOC_Os02g08000	hypothetical protein
Grain_env2_r2	9	QTN-sf0204186350	2	15	LOC_Os02g08014	conserved hypothetical protein
Grain_env2_r2	9	QTN-sf0204186350	2	27	LOC_Os02g08020	hypothetical protein
Grain_env2_r2	9	QTN-sf0204186350	2	48	LOC_Os02g08040	hypothetical protein
Grain_env2_r2	9	QTN-sf0204186350	2	52	LOC_Os02g08050	hypothetical protein
Grain_env2_r2	9	QTN-sf0204186350	2	58	LOC_Os02g08060	hypothetical protein
Grain_env2_r2	9	QTN-sf0204186350	2	78	LOC_Os02g08080	expressed protein
Grain_BLUP	9	QTN-sf0103080456	1	-119	LOC_Os01g06230	OsSAUR1 - Auxin-responsive SAUR gene family member
Grain_BLUP	9	QTN-sf0103080456	1	-116	LOC_Os01g06240	protein kinase, putative, expressed
Grain_BLUP	9	QTN-sf0103080456	1	-114	LOC_Os01g06250	dirigent, putative
Grain_BLUP	9	QTN-sf0103080456	1	-110	LOC_Os01g06260	hypothetical protein
Grain_BLUP	9	QTN-sf0103080456	1	-102	LOC_Os01g06270	expressed protein
Grain_BLUP	9	QTN-sf0103080456	1	-94	LOC_Os01g06280	TKL_IRAK_CrRLK1L-1.4 - The CrRLK1L-1 subfamily has homology to the CrRLK1L homolog, expressed
Grain_BLUP	9	QTN-sf0103080456	1	-92	LOC_Os01g06290	splicing factor, arginine/serine-rich, putative, expressed
Grain_BLUP	9	QTN-sf0103080456	1	-84	LOC_Os01g06300	transposon protein, putative, unclassified
Grain_BLUP	9	QTN-sf0103080456	1	-80	LOC_Os01g06310	glycine-rich cell wall structural protein precursor, putative, expressed
Grain_BLUP	9	QTN-sf0103080456	1	-75	LOC_Os01g06320	MYB family transcription factor, putative, expressed
Grain_BLUP	9	QTN-sf0103080456	1	-69	LOC_Os01g06330	retrotransposon protein, putative, unclassified
Grain_BLUP	9	QTN-sf0103080456	1	-66	LOC_Os01g06340	expressed protein
Grain_BLUP	9	QTN-sf0103080456	1	-65	LOC_Os01g06350	hypothetical protein
Grain_BLUP	9	QTN-sf0103080456	1	-59	LOC_Os01g06360	transposon protein, putative, unclassified
Grain_BLUP	9	QTN-sf0103080456	1	-55	LOC_Os01g06370	hypothetical protein
Grain_BLUP	9	QTN-sf0103080456	1	-53	LOC_Os01g06380	hypothetical protein
Grain_BLUP	9	QTN-sf0103080456	1	-50	LOC_Os01g06390	hypothetical protein
Grain_BLUP	9	QTN-sf0103080456	1	-48	LOC_Os01g06400	expressed protein
Grain_BLUP	9	QTN-sf0103080456	1	-46	LOC_Os01g06410	hypothetical protein
Grain_BLUP	9	QTN-sf0103080456	1	-45	LOC_Os01g06420	hypothetical protein
Grain_BLUP	9	QTN-sf0103080456	1	-44	LOC_Os01g06430	expressed protein
Grain_BLUP	9	QTN-sf0103080456	1	-42	LOC_Os01g06440	expressed protein
Grain_BLUP	9	QTN-sf0103080456	1	-40	LOC_Os01g06450	glycosyltransferase family 43 protein, putative, expressed
Grain_BLUP	9	QTN-sf0103080456	1	-37	LOC_Os01g06454	heat shock protein DnaJ, putative, expressed
Grain_BLUP	9	QTN-sf0103080456	1	-34	LOC_Os01g06460	uncharacterized Cys-rich domain containing protein, putative, expressed
Grain_BLUP	9	QTN-sf0103080456	1	-29	LOC_Os01g06470	expressed protein
Grain_BLUP	9	QTN-sf0103080456	1	-24	LOC_Os01g06490	OsSCP1 - Putative Serine Carboxypeptidase homologue, expressed
Grain_BLUP	9	QTN-sf0103080456	1	-21	LOC_Os01g06500	PHLOEM 2-LIKE A5, putative, expressed
Grain_BLUP	9	QTN-sf0103080456	1	-15	LOC_Os01g06510	arginyl-tRNA synthetase, putative, expressed
Grain_BLUP	9	QTN-sf0103080456	1	-10	LOC_Os01g06520	verticillium wilt disease resistance protein, putative, expressed
Grain_BLUP	9	QTN-sf0103080456	1	1	LOC_Os01g06540	PHD finger protein, putative
Grain_BLUP	9	QTN-sf0103080456	1	3	LOC_Os01g06550	NF-X1-type zinc finger protein, putative, expressed
Grain_BLUP	9	QTN-sf0103080456	1	9	LOC_Os01g06560	transcription factor HBP-1b, putative, expressed
Grain_BLUP	9	QTN-sf0103080456	1	13	LOC_Os01g06570	hypothetical protein
Grain_BLUP	9	QTN-sf0103080456	1	15	LOC_Os01g06580	fasciclin domain containing protein, expressed
Grain_BLUP	9	QTN-sf0103080456	1	17	LOC_Os01g06590	zinc finger, C3HC4 type domain containing protein, expressed
Grain_BLUP	9	QTN-sf0103080456	1	26	LOC_Os01g06600	glutaryl-CoA dehydrogenase, mitochondrial precursor, putative, expressed
Grain_BLUP	9	QTN-sf0103080456	1	34	LOC_Os01g06610	retrotransposon protein, putative, Ty3-gypsy subclass
Grain_BLUP	9	QTN-sf0103080456	1	41	LOC_Os01g06620	expressed protein
Grain_BLUP	9	QTN-sf0103080456	1	42	LOC_Os01g06630	small hydrophilic plant seed protein, putative, expressed
Grain_BLUP	9	QTN-sf0103080456	1	47	LOC_Os01g06640	basic helix-loop-helix, putative, expressed
Grain_BLUP	9	QTN-sf0103080456	1	52	LOC_Os01g06650	retrotransposon protein, putative, unclassified
Grain_BLUP	9	QTN-sf0103080456	1	54	LOC_Os01g06660	thiamine pyrophosphate enzyme, C-terminal TPP binding domain containing protein, expressed
Grain_BLUP	9	QTN-sf0103080456	1	62	LOC_Os01g06670	hcr2-5D, putative, expressed
Grain_BLUP	9	QTN-sf0103080456	1	65	LOC_Os01g06680	retrotransposon protein, putative, unclassified, expressed
Grain_BLUP	9	QTN-sf0103080456	1	75	LOC_Os01g06690	retrotransposon protein, putative, unclassified
Grain_BLUP	9	QTN-sf0103080456	1	79	LOC_Os01g06700	retrotransposon protein, putative, unclassified
Grain_BLUP	9	QTN-sf0103080456	1	86	LOC_Os01g06710	retrotransposon protein, putative, unclassified
Grain_BLUP	9	QTN-sf0103080456	1	95	LOC_Os01g06720	disease resistance protein SlVe2 precursor, putative
Grain_BLUP	9	QTN-sf0103080456	1	100	LOC_Os01g06730	verticillium wilt disease resistance protein, putative, expressed
Grain_BLUP	9	QTN-sf0103080456	1	107	LOC_Os01g06740	ribosome inactivating protein, putative, expressed
Grain_BLUP	9	QTN-sf0103080456	1	115	LOC_Os01g06750	verticillium wilt disease resistance protein precursor, putative
Grain_env1_r1	10	QTN-sf0424236462	4	-118	LOC_Os04g40940	mitotic spindle checkpoint protein MAD2, putative, expressed
Grain_env1_r1	10	QTN-sf0424236462	4	-112	LOC_Os04g40950	glyceraldehyde-3-phosphate dehydrogenase, putative, expressed
Grain_env1_r1	10	QTN-sf0424236462	4	-111	LOC_Os04g40960	OsFBX147 - F-box domain containing protein
Grain_env1_r1	10	QTN-sf0424236462	4	-101	LOC_Os04g40970	DEAD-box ATP-dependent RNA helicase, putative, expressed
Grain_env1_r1	10	QTN-sf0424236462	4	-95	LOC_Os04g40980	Divergent PAP2 family domain containing protein, expressed
Grain_env1_r1	10	QTN-sf0424236462	4	-93	LOC_Os04g40990	malate synthase, glyoxysomal, putative, expressed
Grain_env1_r1	10	QTN-sf0424236462	4	-86	LOC_Os04g41000	expressed protein
Grain_env1_r1	10	QTN-sf0424236462	4	-85	LOC_Os04g41010	hypothetical protein
Grain_env1_r1	10	QTN-sf0424236462	4	-77	LOC_Os04g41020	kelch repeat protein, putative, expressed
Grain_env1_r1	10	QTN-sf0424236462	4	-70	LOC_Os04g41030	inactive receptor kinase At1g27190 precursor, putative, expressed
Grain_env1_r1	10	QTN-sf0424236462	4	-66	LOC_Os04g41040	DNA-directed RNA polymerases I, II, and III subunit RPABC1, putative, expressed
Grain_env1_r1	10	QTN-sf0424236462	4	-63	LOC_Os04g41050	zinc finger, C3HC4 type domain containing protein
Grain_env1_r1	10	QTN-sf0424236462	4	-61	LOC_Os04g41060	zinc finger C-x8-C-x5-C-x3-H type family protein
Grain_env1_r1	10	QTN-sf0424236462	4	-57	LOC_Os04g41070	zinc finger, C3HC4 type domain containing protein
Grain_env1_r1	10	QTN-sf0424236462	4	-54	LOC_Os04g41080	zinc finger, C3HC4 type domain containing protein
Grain_env1_r1	10	QTN-sf0424236462	4	-51	LOC_Os04g41090	retrotransposon protein, putative, unclassified
Grain_env1_r1	10	QTN-sf0424236462	4	-43	LOC_Os04g41100	cyclin-dependent kinase G-2, putative, expressed
Grain_env1_r1	10	QTN-sf0424236462	4	-35	LOC_Os04g41110	Rad21 / Rec8 like protein, putative, expressed
Grain_env1_r1	10	QTN-sf0424236462	4	-30	LOC_Os04g41120	pentatricopeptide, putative, expressed
Grain_env1_r1	10	QTN-sf0424236462	4	-25	LOC_Os04g41130	osFTL6 FT-Like6 homologous to Flowering Locus T gene; contains Pfam profile PF01161: Phosphatidylethanolamine-binding protein, expressed
Grain_env1_r1	10	QTN-sf0424236462	4	-19	LOC_Os04g41140	PPR repeat containing protein, expressed
Grain_env1_r1	10	QTN-sf0424236462	4	-16	LOC_Os04g41150	DUF565 domain containing protein, putative, expressed
Grain_env1_r1	10	QTN-sf0424236462	4	-3	LOC_Os04g41160	protein kinase, putative, expressed
Grain_env1_r1	10	QTN-sf0424236462	4	2	LOC_Os04g41180	hypothetical protein
Grain_env1_r1	10	QTN-sf0424236462	4	5	LOC_Os04g41189	hypothetical protein
Grain_env1_r1	10	QTN-sf0424236462	4	9	LOC_Os04g41200	lipase, putative, expressed
Grain_env1_r1	10	QTN-sf0424236462	4	22	LOC_Os04g41210	hypothetical protein
Grain_env1_r1	10	QTN-sf0424236462	4	33	LOC_Os04g41220	transposon protein, putative, unclassified, expressed
Grain_env1_r1	10	QTN-sf0424236462	4	39	LOC_Os04g41229	helix-loop-helix DNA-binding domain containing protein, expressed
Grain_env1_r1	10	QTN-sf0424236462	4	50	LOC_Os04g41238	expressed protein
Grain_env1_r1	10	QTN-sf0424236462	4	50	LOC_Os04g41250	armadillo/beta-catenin repeat family protein, putative, expressed
Grain_env1_r1	10	QTN-sf0424236462	4	59	LOC_Os04g41260	amine oxidase, flavin-containing, domain containing protein, expressed
Grain_env1_r1	10	QTN-sf0424236462	4	70	LOC_Os04g41270	hypothetical protein
Grain_env1_r1	10	QTN-sf0424236462	4	76	LOC_Os04g41280	ankyrin repeat domain containing protein, expressed
Grain_env1_r1	10	QTN-sf0424236462	4	83	LOC_Os04g41300	ribosome recycling factor, putative, expressed
Grain_env1_r1	10	QTN-sf0424236462	4	90	LOC_Os04g41310	STRUBBELIG-RECEPTOR FAMILY 8 precursor, putative, expressed
Grain_env1_r1	10	QTN-sf0424236462	4	93	LOC_Os04g41320	nucleotide-sugar transporter family protein, putative, expressed
Grain_env1_r1	10	QTN-sf0424236462	4	103	LOC_Os04g41330	expressed protein
Grain_env1_r1	10	QTN-sf0424236462	4	106	LOC_Os04g41340	4-nitrophenylphosphatase, putative, expressed
Grain_env1_r1	10	QTN-sf0424236462	4	112	LOC_Os04g41350	amino acid transporter, putative, expressed
Grain_env1_r1	10	QTN-sf0424236462	4	114	LOC_Os04g41360	hypothetical protein
Grain_env1_r1	10	QTN-sf0424236462	4	116	LOC_Os04g41370	Leucine Rich Repeat family protein
Grain_env1_r2	10	QTN-sf0301664731	3	-111	LOC_Os03g03550	bZIP family transcription factor, putative, expressed
Grain_env1_r2	10	QTN-sf0301664731	3	-106	LOC_Os03g03560	FHA domain containing protein, putative, expressed
Grain_env1_r2	10	QTN-sf0301664731	3	-98	LOC_Os03g03570	leucine-rich repeat transmembrane protein kinase, putative, expressed
Grain_env1_r2	10	QTN-sf0301664731	3	-93	LOC_Os03g03590	transporter, monovalent cation:proton antiporter-2 family, putative, expressed
Grain_env1_r2	10	QTN-sf0301664731	3	-84	LOC_Os03g03600	fasciclin-like arabinogalactan protein, putative, expressed
Grain_env1_r2	10	QTN-sf0301664731	3	-63	LOC_Os03g03610	1,3-beta-glucan synthase component domain containing protein, expressed
Grain_env1_r2	10	QTN-sf0301664731	3	-49	LOC_Os03g03650	POLD2 - Putative DNA polymerase delta complex subunit, expressed
Grain_env1_r2	10	QTN-sf0301664731	3	-56	LOC_Os03g03630	expressed protein
Grain_env1_r2	10	QTN-sf0301664731	3	-53	LOC_Os03g03640	expressed protein
Grain_env1_r2	10	QTN-sf0301664731	3	-45	LOC_Os03g03654	hypothetical protein
Grain_env1_r2	10	QTN-sf0301664731	3	-33	LOC_Os03g03670	expressed protein
Grain_env1_r2	10	QTN-sf0301664731	3	-36	LOC_Os03g03660	CAMK_CAMK_like.17 - CAMK includes calcium/calmodulin depedent protein kinases, expressed
Grain_env1_r2	10	QTN-sf0301664731	3	1	LOC_Os03g03724	expressed protein
Grain_env1_r2	10	QTN-sf0301664731	3	4	LOC_Os03g03740	retrotransposon protein, putative, unclassified
Grain_env1_r2	10	QTN-sf0301664731	3	5	LOC_Os03g03750	hypothetical protein
Grain_env1_r2	10	QTN-sf0301664731	3	19	LOC_Os03g03770	expressed protein
Grain_env1_r2	10	QTN-sf0301664731	3	45	LOC_Os03g03800	hypothetical protein
Grain_env1_r2	10	QTN-sf0301664731	3	64	LOC_Os03g03840	hypothetical protein
Grain_env1_r2	10	QTN-sf0301664731	3	71	LOC_Os03g03860	expressed protein
Grain_env1_r2	10	QTN-sf0301664731	3	-27	LOC_Os03g03680	transporter family protein, putative, expressed
Grain_env1_r2	10	QTN-sf0301664731	3	-19	LOC_Os03g03690	glycosylphosphatidylinositol anchor biosynthesis protein 11, putative, expressed
Grain_env1_r2	10	QTN-sf0301664731	3	-16	LOC_Os03g03700	MLO domain containing protein, putative, expressed
Grain_env1_r2	10	QTN-sf0301664731	3	-4	LOC_Os03g03710	ribonuclease protein, putative, expressed
Grain_env1_r2	10	QTN-sf0301664731	3	0	LOC_Os03g03720	glyceraldehyde-3-phosphate dehydrogenase, putative, expressed
Grain_env1_r2	10	QTN-sf0301664731	3	2	LOC_Os03g03730	regulatory protein, putative, expressed
Grain_env1_r2	10	QTN-sf0301664731	3	7	LOC_Os03g03760	MYB family transcription factor, putative, expressed
Grain_env1_r2	10	QTN-sf0301664731	3	40	LOC_Os03g03790	AMP-binding domain containing protein, expressed
Grain_env1_r2	10	QTN-sf0301664731	3	48	LOC_Os03g03810	DEF8 - Defensin and Defensin-like DEFL family, expressed
Grain_env1_r2	10	QTN-sf0301664731	3	50	LOC_Os03g03820	adenylate kinase, putative, expressed
Grain_env1_r2	10	QTN-sf0301664731	3	54	LOC_Os03g03830	EF hand family protein, putative, expressed
Grain_env1_r2	10	QTN-sf0301664731	3	67	LOC_Os03g03850	GATA zinc finger domain containing protein
Grain_env1_r2	10	QTN-sf0301664731	3	86	LOC_Os03g03870	DNA-binding bromodomain-containing protein, putative, expressed
Grain_env1_r2	10	QTN-sf0301664731	3	99	LOC_Os03g03880	protein kinase, putative, expressed
Grain_env1_r2	10	QTN-sf0301664731	3	107	LOC_Os03g03890	protein kinase family protein, putative, expressed
Grain_env1_r2	10	QTN-sf0301664731	3	110	LOC_Os03g03900	NIN, putative, expressed
Grain_env2_r1	10	QTN-sf0208351440	2	-102	LOC_Os02g14840	potassium channel KAT1, putative, expressed
Grain_env2_r1	10	QTN-sf0208351440	2	-85	LOC_Os02g14860	prefoldin subunit, putative, expressed
Grain_env2_r1	10	QTN-sf0208351440	2	-34	LOC_Os02g14900	1,3-beta-glucan synthase component domain containing protein, expressed
Grain_env2_r1	10	QTN-sf0208351440	2	-25	LOC_Os02g14910	bZIP transcription factor family protein, putative, expressed
Grain_env2_r1	10	QTN-sf0208351440	2	-8	LOC_Os02g14929	T-complex protein, putative, expressed
Grain_env2_r1	10	QTN-sf0208351440	2	-116	LOC_Os02g14820	hypothetical protein
Grain_env2_r1	10	QTN-sf0208351440	2	-108	LOC_Os02g14830	hypothetical protein
Grain_env2_r1	10	QTN-sf0208351440	2	-93	LOC_Os02g14850	expressed protein
Grain_env2_r1	10	QTN-sf0208351440	2	-89	LOC_Os02g14855	conserved hypothetical protein
Grain_env2_r1	10	QTN-sf0208351440	2	-81	LOC_Os02g14870	conserved hypothetical protein
Grain_env2_r1	10	QTN-sf0208351440	2	-72	LOC_Os02g14874	expressed protein
Grain_env2_r1	10	QTN-sf0208351440	2	-61	LOC_Os02g14880	hypothetical protein
Grain_env2_r1	10	QTN-sf0208351440	2	-58	LOC_Os02g14890	expressed protein
Grain_env2_r1	10	QTN-sf0208351440	2	34	LOC_Os02g15030	hypothetical protein
Grain_env2_r1	10	QTN-sf0208351440	2	39	LOC_Os02g15040	hypothetical protein
Grain_env2_r1	10	QTN-sf0208351440	2	42	LOC_Os02g15050	hypothetical protein
Grain_env2_r1	10	QTN-sf0208351440	2	77	LOC_Os02g15130	hypothetical protein
Grain_env2_r1	10	QTN-sf0208351440	2	82	LOC_Os02g15140	retrotransposon protein, putative, unclassified, expressed
Grain_env2_r1	10	QTN-sf0208351440	2	7	LOC_Os02g14980	calcium-binding EF hand family protein, putative, expressed
Grain_env2_r1	10	QTN-sf0208351440	2	11	LOC_Os02g14990	zinc finger, C3HC4 type domain containing protein, expressed
Grain_env2_r1	10	QTN-sf0208351440	2	15	LOC_Os02g15000	zinc finger, C3HC4 type domain containing protein, expressed
Grain_env2_r1	10	QTN-sf0208351440	2	23	LOC_Os02g15010	zinc finger, C3HC4 type domain containing protein, expressed
Grain_env2_r1	10	QTN-sf0208351440	2	29	LOC_Os02g15020	zinc finger, C3HC4 type domain containing protein
Grain_env2_r1	10	QTN-sf0208351440	2	45	LOC_Os02g15060	zinc finger, C3HC4 type domain containing protein
Grain_env2_r1	10	QTN-sf0208351440	2	49	LOC_Os02g15070	glutelin, putative, expressed
Grain_env2_r1	10	QTN-sf0208351440	2	53	LOC_Os02g15080	zinc finger, C3HC4 type domain containing protein, expressed
Grain_env2_r1	10	QTN-sf0208351440	2	55	LOC_Os02g15090	glutelin, putative, expressed
Grain_env2_r1	10	QTN-sf0208351440	2	59	LOC_Os02g15100	zinc finger, C3HC4 type domain containing protein, expressed
Grain_env2_r1	10	QTN-sf0208351440	2	65	LOC_Os02g15110	zinc finger, C3HC4 type domain containing protein, expressed
Grain_env2_r1	10	QTN-sf0208351440	2	71	LOC_Os02g15120	RING-H2 finger protein, putative, expressed
Grain_env2_r1	10	QTN-sf0208351440	2	95	LOC_Os02g15150	glutelin, putative, expressed
Grain_env2_r1	10	QTN-sf0208351440	2	102	LOC_Os02g15160	OsFBX40 - F-box domain containing protein, expressed
Grain_env2_r1	10	QTN-sf0208351440	2	107	LOC_Os02g15169	glutelin, putative, expressed
Grain_env2_r1	10	QTN-sf0208351440	2	113	LOC_Os02g15178	glutelin, putative, expressed
Grain_env2_r2	10	QTN-sf0208384745	2	-67	LOC_Os02g14900	1,3-beta-glucan synthase component domain containing protein, expressed
Grain_env2_r2	10	QTN-sf0208384745	2	-58	LOC_Os02g14910	bZIP transcription factor family protein, putative, expressed
Grain_env2_r2	10	QTN-sf0208384745	2	-41	LOC_Os02g14929	T-complex protein, putative, expressed
Grain_env2_r2	10	QTN-sf0208384745	2	-21	LOC_Os02g14980	calcium-binding EF hand family protein, putative, expressed
Grain_env2_r2	10	QTN-sf0208384745	2	-20	LOC_Os02g14990	zinc finger, C3HC4 type domain containing protein, expressed
Grain_env2_r2	10	QTN-sf0208384745	2	-16	LOC_Os02g15000	zinc finger, C3HC4 type domain containing protein, expressed
Grain_env2_r2	10	QTN-sf0208384745	2	-8	LOC_Os02g15010	zinc finger, C3HC4 type domain containing protein, expressed
Grain_env2_r2	10	QTN-sf0208384745	2	-114	LOC_Os02g14870	conserved hypothetical protein
Grain_env2_r2	10	QTN-sf0208384745	2	-106	LOC_Os02g14874	expressed protein
Grain_env2_r2	10	QTN-sf0208384745	2	-95	LOC_Os02g14880	hypothetical protein
Grain_env2_r2	10	QTN-sf0208384745	2	-91	LOC_Os02g14890	expressed protein
Grain_env2_r2	10	QTN-sf0208384745	2	-3	LOC_Os02g15020	zinc finger, C3HC4 type domain containing protein
Grain_env2_r2	10	QTN-sf0208384745	2	-32	LOC_Os02g14970	hypothetical protein
Grain_env2_r2	10	QTN-sf0208384745	2	12	LOC_Os02g15060	zinc finger, C3HC4 type domain containing protein
Grain_env2_r2	10	QTN-sf0208384745	2	16	LOC_Os02g15070	glutelin, putative, expressed
Grain_env2_r2	10	QTN-sf0208384745	2	20	LOC_Os02g15080	zinc finger, C3HC4 type domain containing protein, expressed
Grain_env2_r2	10	QTN-sf0208384745	2	1	LOC_Os02g15030	hypothetical protein
Grain_env2_r2	10	QTN-sf0208384745	2	5	LOC_Os02g15040	hypothetical protein
Grain_env2_r2	10	QTN-sf0208384745	2	9	LOC_Os02g15050	hypothetical protein
Grain_env2_r2	10	QTN-sf0208384745	2	21	LOC_Os02g15090	glutelin, putative, expressed
Grain_env2_r2	10	QTN-sf0208384745	2	26	LOC_Os02g15100	zinc finger, C3HC4 type domain containing protein, expressed
Grain_env2_r2	10	QTN-sf0208384745	2	32	LOC_Os02g15110	zinc finger, C3HC4 type domain containing protein, expressed
Grain_env2_r2	10	QTN-sf0208384745	2	44	LOC_Os02g15130	hypothetical protein
Grain_env2_r2	10	QTN-sf0208384745	2	48	LOC_Os02g15140	retrotransposon protein, putative, unclassified, expressed
Grain_env2_r2	10	QTN-sf0208384745	2	38	LOC_Os02g15120	RING-H2 finger protein, putative, expressed
Grain_env2_r2	10	QTN-sf0208384745	2	61	LOC_Os02g15150	glutelin, putative, expressed
Grain_env2_r2	10	QTN-sf0208384745	2	85	LOC_Os02g15190	retrotransposon protein, putative, unclassified
Grain_env2_r2	10	QTN-sf0208384745	2	94	LOC_Os02g15200	hypothetical protein
Grain_env2_r2	10	QTN-sf0208384745	2	96	LOC_Os02g15210	hypothetical protein
Grain_env2_r2	10	QTN-sf0208384745	2	69	LOC_Os02g15160	OsFBX40 - F-box domain containing protein, expressed
Grain_env2_r2	10	QTN-sf0208384745	2	73	LOC_Os02g15169	glutelin, putative, expressed
Grain_env2_r2	10	QTN-sf0208384745	2	80	LOC_Os02g15178	glutelin, putative, expressed
Grain_env2_r2	10	QTN-sf0208384745	2	105	LOC_Os02g15220	bromodomain containing protein, expressed
Grain_env2_r2	10	QTN-sf0208384745	2	116	LOC_Os02g15230	GDSL-like lipase/acylhydrolase, putative, expressed
Grain_BLUP	10	QTN-sf0103080463	1	-119	LOC_Os01g06230	OsSAUR1 - Auxin-responsive SAUR gene family member
Grain_BLUP	10	QTN-sf0103080463	1	-116	LOC_Os01g06240	protein kinase, putative, expressed
Grain_BLUP	10	QTN-sf0103080463	1	-114	LOC_Os01g06250	dirigent, putative
Grain_BLUP	10	QTN-sf0103080463	1	-110	LOC_Os01g06260	hypothetical protein
Grain_BLUP	10	QTN-sf0103080463	1	-102	LOC_Os01g06270	expressed protein
Grain_BLUP	10	QTN-sf0103080463	1	-94	LOC_Os01g06280	TKL_IRAK_CrRLK1L-1.4 - The CrRLK1L-1 subfamily has homology to the CrRLK1L homolog, expressed
Grain_BLUP	10	QTN-sf0103080463	1	-92	LOC_Os01g06290	splicing factor, arginine/serine-rich, putative, expressed
Grain_BLUP	10	QTN-sf0103080463	1	-84	LOC_Os01g06300	transposon protein, putative, unclassified
Grain_BLUP	10	QTN-sf0103080463	1	-80	LOC_Os01g06310	glycine-rich cell wall structural protein precursor, putative, expressed
Grain_BLUP	10	QTN-sf0103080463	1	-75	LOC_Os01g06320	MYB family transcription factor, putative, expressed
Grain_BLUP	10	QTN-sf0103080463	1	-69	LOC_Os01g06330	retrotransposon protein, putative, unclassified
Grain_BLUP	10	QTN-sf0103080463	1	-66	LOC_Os01g06340	expressed protein
Grain_BLUP	10	QTN-sf0103080463	1	-65	LOC_Os01g06350	hypothetical protein
Grain_BLUP	10	QTN-sf0103080463	1	-59	LOC_Os01g06360	transposon protein, putative, unclassified
Grain_BLUP	10	QTN-sf0103080463	1	-55	LOC_Os01g06370	hypothetical protein
Grain_BLUP	10	QTN-sf0103080463	1	-53	LOC_Os01g06380	hypothetical protein
Grain_BLUP	10	QTN-sf0103080463	1	-50	LOC_Os01g06390	hypothetical protein
Grain_BLUP	10	QTN-sf0103080463	1	-48	LOC_Os01g06400	expressed protein
Grain_BLUP	10	QTN-sf0103080463	1	-46	LOC_Os01g06410	hypothetical protein
Grain_BLUP	10	QTN-sf0103080463	1	-45	LOC_Os01g06420	hypothetical protein
Grain_BLUP	10	QTN-sf0103080463	1	-44	LOC_Os01g06430	expressed protein
Grain_BLUP	10	QTN-sf0103080463	1	-42	LOC_Os01g06440	expressed protein
Grain_BLUP	10	QTN-sf0103080463	1	-40	LOC_Os01g06450	glycosyltransferase family 43 protein, putative, expressed
Grain_BLUP	10	QTN-sf0103080463	1	-37	LOC_Os01g06454	heat shock protein DnaJ, putative, expressed
Grain_BLUP	10	QTN-sf0103080463	1	-34	LOC_Os01g06460	uncharacterized Cys-rich domain containing protein, putative, expressed
Grain_BLUP	10	QTN-sf0103080463	1	-29	LOC_Os01g06470	expressed protein
Grain_BLUP	10	QTN-sf0103080463	1	-24	LOC_Os01g06490	OsSCP1 - Putative Serine Carboxypeptidase homologue, expressed
Grain_BLUP	10	QTN-sf0103080463	1	-21	LOC_Os01g06500	PHLOEM 2-LIKE A5, putative, expressed
Grain_BLUP	10	QTN-sf0103080463	1	-15	LOC_Os01g06510	arginyl-tRNA synthetase, putative, expressed
Grain_BLUP	10	QTN-sf0103080463	1	-10	LOC_Os01g06520	verticillium wilt disease resistance protein, putative, expressed
Grain_BLUP	10	QTN-sf0103080463	1	1	LOC_Os01g06540	PHD finger protein, putative
Grain_BLUP	10	QTN-sf0103080463	1	3	LOC_Os01g06550	NF-X1-type zinc finger protein, putative, expressed
Grain_BLUP	10	QTN-sf0103080463	1	9	LOC_Os01g06560	transcription factor HBP-1b, putative, expressed
Grain_BLUP	10	QTN-sf0103080463	1	13	LOC_Os01g06570	hypothetical protein
Grain_BLUP	10	QTN-sf0103080463	1	15	LOC_Os01g06580	fasciclin domain containing protein, expressed
Grain_BLUP	10	QTN-sf0103080463	1	17	LOC_Os01g06590	zinc finger, C3HC4 type domain containing protein, expressed
Grain_BLUP	10	QTN-sf0103080463	1	26	LOC_Os01g06600	glutaryl-CoA dehydrogenase, mitochondrial precursor, putative, expressed
Grain_BLUP	10	QTN-sf0103080463	1	34	LOC_Os01g06610	retrotransposon protein, putative, Ty3-gypsy subclass
Grain_BLUP	10	QTN-sf0103080463	1	41	LOC_Os01g06620	expressed protein
Grain_BLUP	10	QTN-sf0103080463	1	42	LOC_Os01g06630	small hydrophilic plant seed protein, putative, expressed
Grain_BLUP	10	QTN-sf0103080463	1	47	LOC_Os01g06640	basic helix-loop-helix, putative, expressed
Grain_BLUP	10	QTN-sf0103080463	1	52	LOC_Os01g06650	retrotransposon protein, putative, unclassified
Grain_BLUP	10	QTN-sf0103080463	1	54	LOC_Os01g06660	thiamine pyrophosphate enzyme, C-terminal TPP binding domain containing protein, expressed
Grain_BLUP	10	QTN-sf0103080463	1	62	LOC_Os01g06670	hcr2-5D, putative, expressed
Grain_BLUP	10	QTN-sf0103080463	1	65	LOC_Os01g06680	retrotransposon protein, putative, unclassified, expressed
Grain_BLUP	10	QTN-sf0103080463	1	75	LOC_Os01g06690	retrotransposon protein, putative, unclassified
Grain_BLUP	10	QTN-sf0103080463	1	79	LOC_Os01g06700	retrotransposon protein, putative, unclassified
Grain_BLUP	10	QTN-sf0103080463	1	86	LOC_Os01g06710	retrotransposon protein, putative, unclassified
Grain_BLUP	10	QTN-sf0103080463	1	95	LOC_Os01g06720	disease resistance protein SlVe2 precursor, putative
Grain_BLUP	10	QTN-sf0103080463	1	100	LOC_Os01g06730	verticillium wilt disease resistance protein, putative, expressed
Grain_BLUP	10	QTN-sf0103080463	1	107	LOC_Os01g06740	ribosome inactivating protein, putative, expressed
Grain_BLUP	10	QTN-sf0103080463	1	115	LOC_Os01g06750	verticillium wilt disease resistance protein precursor, putative
Grain_env1_r1	11	QTN-sf0405929388	4	-112	LOC_Os04g10700	retrotransposon protein, putative, unclassified
Grain_env1_r1	11	QTN-sf0405929388	4	-106	LOC_Os04g10720	retrotransposon protein, putative, unclassified
Grain_env1_r1	11	QTN-sf0405929388	4	-104	LOC_Os04g10724	retrotransposon protein, putative, unclassified
Grain_env1_r1	11	QTN-sf0405929388	4	-100	LOC_Os04g10730	retrotransposon protein, putative, unclassified
Grain_env1_r1	11	QTN-sf0405929388	4	-94	LOC_Os04g10740	retrotransposon protein, putative, unclassified
Grain_env1_r1	11	QTN-sf0405929388	4	-84	LOC_Os04g10750	inorganic phosphate transporter, putative, expressed
Grain_env1_r1	11	QTN-sf0405929388	4	-82	LOC_Os04g10760	conserved hypothetical protein
Grain_env1_r1	11	QTN-sf0405929388	4	-78	LOC_Os04g10770	hypothetical protein
Grain_env1_r1	11	QTN-sf0405929388	4	-74	LOC_Os04g10780	hypothetical protein
Grain_env1_r1	11	QTN-sf0405929388	4	-71	LOC_Os04g10790	hypothetical protein
Grain_env1_r1	11	QTN-sf0405929388	4	-65	LOC_Os04g10800	inorganic phosphate transporter, putative
Grain_env1_r1	11	QTN-sf0405929388	4	-61	LOC_Os04g10820	transposon protein, putative, unclassified
Grain_env1_r1	11	QTN-sf0405929388	4	-56	LOC_Os04g10830	hypothetical protein
Grain_env1_r1	11	QTN-sf0405929388	4	-50	LOC_Os04g10840	retrotransposon protein, putative, Ty3-gypsy subclass
Grain_env1_r1	11	QTN-sf0405929388	4	-44	LOC_Os04g10850	retrotransposon protein, putative, Ty3-gypsy subclass
Grain_env1_r1	11	QTN-sf0405929388	4	-40	LOC_Os04g10860	transposon protein, putative, unclassified
Grain_env1_r1	11	QTN-sf0405929388	4	-37	LOC_Os04g10870	conserved hypothetical protein
Grain_env1_r1	11	QTN-sf0405929388	4	-31	LOC_Os04g10880	retrotransposon protein, putative, unclassified
Grain_env1_r1	11	QTN-sf0405929388	4	-27	LOC_Os04g10890	conserved hypothetical protein
Grain_env1_r1	11	QTN-sf0405929388	4	-24	LOC_Os04g10900	retrotransposon protein, putative, unclassified
Grain_env1_r1	11	QTN-sf0405929388	4	-19	LOC_Os04g10910	hypothetical protein
Grain_env1_r1	11	QTN-sf0405929388	4	-9	LOC_Os04g10924	hypothetical protein
Grain_env1_r1	11	QTN-sf0405929388	4	-2	LOC_Os04g10940	expressed protein
Grain_env1_r1	11	QTN-sf0405929388	4	6	LOC_Os04g10950	transposon protein, putative, CACTA, En/Spm sub-class
Grain_env1_r1	11	QTN-sf0405929388	4	12	LOC_Os04g10960	transposon protein, putative, CACTA, En/Spm sub-class
Grain_env1_r1	11	QTN-sf0405929388	4	21	LOC_Os04g10970	hypothetical protein
Grain_env1_r1	11	QTN-sf0405929388	4	23	LOC_Os04g10980	transposon protein, putative, CACTA, En/Spm sub-class
Grain_env1_r1	11	QTN-sf0405929388	4	40	LOC_Os04g10990	retrotransposon protein, putative, unclassified
Grain_env1_r1	11	QTN-sf0405929388	4	42	LOC_Os04g11004	retrotransposon protein, putative, unclassified
Grain_env1_r1	11	QTN-sf0405929388	4	50	LOC_Os04g11020	retrotransposon protein, putative, Ty3-gypsy subclass
Grain_env1_r1	11	QTN-sf0405929388	4	52	LOC_Os04g11030	expressed protein
Grain_env1_r1	11	QTN-sf0405929388	4	55	LOC_Os04g11040	expressed protein
Grain_env1_r1	11	QTN-sf0405929388	4	70	LOC_Os04g11050	expressed protein
Grain_env1_r1	11	QTN-sf0405929388	4	77	LOC_Os04g11060	expressed protein
Grain_env1_r1	11	QTN-sf0405929388	4	82	LOC_Os04g11070	retrotransposon protein, putative, unclassified
Grain_env1_r1	11	QTN-sf0405929388	4	94	LOC_Os04g11080	retrotransposon protein, putative, unclassified
Grain_env1_r1	11	QTN-sf0405929388	4	98	LOC_Os04g11090	retrotransposon protein, putative, unclassified
Grain_env1_r1	11	QTN-sf0405929388	4	107	LOC_Os04g11100	hypothetical protein
Grain_env1_r1	11	QTN-sf0405929388	4	112	LOC_Os04g11110	hypothetical protein
Grain_env1_r1	11	QTN-sf0405929388	4	117	LOC_Os04g11120	expressed protein
Grain_env1_r1	11	QTN-sf0405929388	4	119	LOC_Os04g11130	DEF9 - Defensin and Defensin-like DEFL family, expressed
Grain_env1_r2	11	QTN-sf0301665162	3	-112	LOC_Os03g03550	bZIP family transcription factor, putative, expressed
Grain_env1_r2	11	QTN-sf0301665162	3	-107	LOC_Os03g03560	FHA domain containing protein, putative, expressed
Grain_env1_r2	11	QTN-sf0301665162	3	-99	LOC_Os03g03570	leucine-rich repeat transmembrane protein kinase, putative, expressed
Grain_env1_r2	11	QTN-sf0301665162	3	-94	LOC_Os03g03590	transporter, monovalent cation:proton antiporter-2 family, putative, expressed
Grain_env1_r2	11	QTN-sf0301665162	3	-85	LOC_Os03g03600	fasciclin-like arabinogalactan protein, putative, expressed
Grain_env1_r2	11	QTN-sf0301665162	3	-64	LOC_Os03g03610	1,3-beta-glucan synthase component domain containing protein, expressed
Grain_env1_r2	11	QTN-sf0301665162	3	-49	LOC_Os03g03650	POLD2 - Putative DNA polymerase delta complex subunit, expressed
Grain_env1_r2	11	QTN-sf0301665162	3	-36	LOC_Os03g03660	CAMK_CAMK_like.17 - CAMK includes calcium/calmodulin depedent protein kinases, expressed
Grain_env1_r2	11	QTN-sf0301665162	3	-27	LOC_Os03g03680	transporter family protein, putative, expressed
Grain_env1_r2	11	QTN-sf0301665162	3	-19	LOC_Os03g03690	glycosylphosphatidylinositol anchor biosynthesis protein 11, putative, expressed
Grain_env1_r2	11	QTN-sf0301665162	3	-57	LOC_Os03g03630	expressed protein
Grain_env1_r2	11	QTN-sf0301665162	3	-54	LOC_Os03g03640	expressed protein
Grain_env1_r2	11	QTN-sf0301665162	3	-45	LOC_Os03g03654	hypothetical protein
Grain_env1_r2	11	QTN-sf0301665162	3	-34	LOC_Os03g03670	expressed protein
Grain_env1_r2	11	QTN-sf0301665162	3	1	LOC_Os03g03724	expressed protein
Grain_env1_r2	11	QTN-sf0301665162	3	-17	LOC_Os03g03700	MLO domain containing protein, putative, expressed
Grain_env1_r2	11	QTN-sf0301665162	3	3	LOC_Os03g03740	retrotransposon protein, putative, unclassified
Grain_env1_r2	11	QTN-sf0301665162	3	4	LOC_Os03g03750	hypothetical protein
Grain_env1_r2	11	QTN-sf0301665162	3	19	LOC_Os03g03770	expressed protein
Grain_env1_r2	11	QTN-sf0301665162	3	45	LOC_Os03g03800	hypothetical protein
[truncated: 11,104 more rows]

## Sheet: Supplementary Table S4
Supplementary Table S4 | QTN-by-environment interactions (QEIs) detected from grain/leaf lysine content datasets in rice.
Dataset	QEI	SNP	Chromosome	Position	LOD (QEI)	add*env1	dom*env1	add*env2	dom*env2	add*env3	dom*env3	add*env4	dom*env4	R2 (%)	P-value
Lys_grain	QEI-sf0111954416	C/T	1	11954416	9.7397	0.0809	0.2633	-0.0638	-0.5536	0.0606	1.2089	-0.0777	-0.9186	0.3459	5.00919e-08
Lys_grain	QEI-sf0118687236	G/C	1	18687236	5.9704	0.0214		-0.0291		0.1122		-0.1045		0.1963	4.6382e-06
Lys_grain	QEI-sf0203208379	G/A	2	3208379	21.8248	-0.0841	-0.0776	-0.0773	0.1357	0.2521	-0.8142	-0.0908	0.7561	0.7326	1.97042e-19
Lys_grain	QEI-sf0421301518	A/G	4	21301518	14.9573	-0.108	-0.2749	-0.0586	-0.1652	0.0078	0.4115	0.1589	0.0287	0.534	6.94325e-13
Lys_grain	QEI-sf0508260021	T/G	5	8260021	20.207	-0.0132	0.0736	-0.1516	0.0316	0.2608	-0.0841	-0.096	-0.0211	0.6807	7.02715e-18
Lys_grain	QEI-sf0510559350	A/G	5	10559350	8.2744	-0.0557		-0.0581		0.1622		-0.0484		0.2781	2.68721e-08
Lys_grain	QEI-sf0519452033	T/C	5	19452033	11.8774	-0.1071	-0.56	0.0169	-0.4032	0.1112	1.5964	-0.021	-0.6332	0.4308	5.34076e-10
Lys_grain	QEI-sf0519512601	T/C	5	19512601	10.5302	-0.0854		-0.0463		0.1834		-0.0517		0.3619	1.67353e-10
Lys_grain	QEI-sf0609623346	C/T	6	9623346	11.7188	-0.0814	0.117	-0.0237	0.1441	0.1542	-0.3583	-0.0491	0.0971	0.4025	7.49836e-10
Lys_grain	QEI-sf0817597165	C/A	8	17597165	13.3789	0.0865	0.2749	0.0447	0.6271	-0.0635	-1.2501	-0.0677	0.3481	0.4153	2.11808e-11
Lys_grain	QEI-sf0822241593	G/A	8	22241593	10.5748	-0.1047	0.4508	-0.0301	0.3066	0.1339	-0.8505	0.0008	0.0931	0.3747	8.57329e-09
Lys_grain	QEI-sf0828052927	G/C	8	28052927	25.4736	0.0481	-0.0876	0.1465	-0.1203	-0.2785	0.2998	0.084	-0.0919	0.8675	5.9938e-23
Lys_grain	QEI-sf1000817490	C/T	10	817490	21.0107	-0.0717		-0.0552		0.2561		-0.1291		0.7156	7.7496e-21
Lys_grain	QEI-sf1003226815	A/C	10	3226815	3.9353	0.037		0.0724		-0.0993		-0.0102		0.1312	0.000415101
Lys_grain	QEI-sf1003698338	A/G	10	3698338	19.3197	-0.0465	0.002	-0.1128	-0.1268	0.2386	0.2689	-0.0792	-0.1441	0.6491	4.96494e-17
Lys_grain	QEI-sf1004407883	C/T	10	4407883	9.4444	0.006	0.1615	0.0664	0.3497	-0.0495	-0.6577	-0.0228	0.1465	0.2999	9.32352e-08
Lys_grain	QEI-sf1007963669	A/G	10	7963669	15.0702	-0.0877		-0.0547		0.2202		-0.0779		0.5162	5.74203e-15
Lys_grain	QEI-sf1011704255	G/A	10	11704255	16.0423	0.0467	0.087	0.0546	-0.2391	0.0274	0.5772	-0.1286	-0.4252	0.5321	6.54254e-14
Lys_grain	QEI-sf1206575275	T/A	12	6575275	16.7314	0.0265	-0.0283	-0.0477	0.3691	0.0106	-0.558	0.0105	0.2172	0.5215	1.45285e-14
Lys_grain	QEI-sf1218423609	C/G	12	18423609	12.2243	-0.033	-0.058	0.0671	-0.1589	0.0359	0.5333	-0.0701	-0.3164	0.4189	2.53965e-10
Lys_leaf	QEI-sf0101455922	G/A	1	1455922	32.8621	0.1147	-0.0101	-0.1147	0.0101					2.1621	1.3776e-33
Lys_leaf	QEI-sf0103224994	T/A	1	3224994	15.4613	0.0739		-0.0739						0.9647	3.22893e-17
Lys_leaf	QEI-sf0114245598	A/G	1	14245598	12.8843	0.0688	0.0299	-0.0688	-0.0299					0.7977	1.30659e-13
Lys_leaf	QEI-sf0139197036	T/G	1	39197036	6.617	0.0006	0.2001	-0.0006	-0.2001					0.402	2.41688e-07
Lys_leaf	QEI-sf0140517811	A/C	1	40517811	3.9869	-0.0084	-0.25	0.0084	0.25					0.2403	0.000103103
Lys_leaf	QEI-sf0141898638	A/G	1	41898638	13.4275	0.0687		-0.0687						0.8327	3.73743e-15
Lys_leaf	QEI-sf0407551318	A/G	4	7551318	30.4832	-0.0855	-0.2452	0.0855	0.2452					1.991	3.29586e-31
Lys_leaf	QEI-sf0420288752	C/T	4	20288752	12.2662	-0.0309	-0.5093	0.0309	0.5093					0.758	5.42334e-13
Lys_leaf	QEI-sf0429502098	C/T	4	29502098	24.3671	0.0335	0.1589	-0.0335	-0.1589					1.562	4.30312e-25
Lys_leaf	QEI-sf0517657114	C/A	5	17657114	8.3749	0.0284	0.1245	-0.0284	-0.1245					0.5115	4.221e-09
Lys_leaf	QEI-sf0518347274	T/C	5	18347274	9.0596	0.0542	0.0644	-0.0542	-0.0644					0.5545	8.7244e-10
Lys_leaf	QEI-sf0608147421	G/A	6	8147421	12.0914	0.065		-0.065						0.7468	8.52392e-14
Lys_leaf	QEI-sf0707023231	G/A	7	7023231	6.0892	-0.0126	-0.1282	0.0126	0.1282					0.3694	8.14732e-07
Lys_leaf	QEI-sf0713769437	A/G	7	13769437	9.0139	0.0188	-0.423	-0.0188	0.423					0.5516	9.693e-10
Lys_leaf	QEI-sf0725201078	A/G	7	25201078	8.3244	-0.0537		0.0537						0.5084	5.96169e-10
Lys_leaf	QEI-sf0815836662	G/A	8	15836662	13.0773	-0.0198	-0.1475	0.0198	0.1475					0.8101	8.37824e-14
Lys_leaf	QEI-sf0901978121	T/G	9	1978121	7.664	0.0483	-0.0735	-0.0483	0.0735					0.4671	2.16891e-08
Lys_leaf	QEI-sf0904915733	T/C	9	4915733	29.1616	0.1036		-0.1036						1.897	4.72254e-31
Lys_leaf	QEI-sf0907732202	C/A	9	7732202	17.6274	0.0797	-0.0473	-0.0797	0.0473					1.1071	2.3617e-18
Lys_leaf	QEI-sf1005146233	T/C	10	5146233	22.2601	0.0896		-0.0896						1.4178	4.2973e-24
Lys_leaf	QEI-sf1005281703	C/T	10	5281703	9.885	0.0378	-0.0756	-0.0378	0.0756					0.6065	1.30418e-10
Lys_leaf	QEI-sf1016412590	T/A	10	16412590	9.2246	0.0566		-0.0566						0.5649	7.14283e-11
Lys_leaf	QEI-sf1016812592	A/T	10	16812592	10.4812	0.0196	-0.1257	-0.0196	0.1257					0.6442	3.30523e-11
Lys_leaf	QEI-sf1105428802	A/G	11	5428802	25.3098	0.096		-0.096						1.6271	3.5989e-27
Lys_leaf	QEI-sf1125165035	G/A	11	25165035	30.7661	-0.1113	-0.0798	0.1113	0.0798					2.0112	1.71807e-31
Lys_leaf	QEI-sf1126812304	C/T	11	26812304	4.9939	0.0449	0.022	-0.0449	-0.022					0.3019	1.01456e-05
Lys_leaf	QEI-sf1128003310	C/G	11	28003310	7.3131	-0.0439	0.0731	0.0439	-0.0731					0.4453	4.8665e-08
Lys_leaf	QEI-sf1206841048	C/A	12	6841048	6.0593	-0.0158	-0.2982	0.0158	0.2982					0.3675	8.72813e-07
Lys_leaf	QEI-sf1216018805	C/T	12	16018805	15.8444	0.0733	-0.1904	-0.0733	0.1904					0.9898	1.43291e-16
Lys_leaf	QEI-sf1220860715	T/G	12	20860715	6.2817	0.006	-0.131	-0.006	0.131					0.3813	5.22989e-07

## Sheet: Supplementary Table S5
Supplementary Table S5 | Candidate genes of QEIs.
Dataset	QEI No.	QEI	Chromosome	Distance (kb)	MSU_locus	Functional annotation
Lys_grain	1	QEI-sf0111954416	1	-112	LOC_Os01g21220	retrotransposon protein, putative, unclassified
Lys_grain	1	QEI-sf0111954416	1	-103	LOC_Os01g21230	nodulin MtN3 family protein, putative
Lys_grain	1	QEI-sf0111954416	1	-96	LOC_Os01g21240	MLA6 protein, putative, expressed
Lys_grain	1	QEI-sf0111954416	1	-91	LOC_Os01g21250	late embryogenesis abundant protein, putative
Lys_grain	1	QEI-sf0111954416	1	-75	LOC_Os01g21260	hypothetical protein
Lys_grain	1	QEI-sf0111954416	1	-73	LOC_Os01g21270	retrotransposon protein, putative, unclassified
Lys_grain	1	QEI-sf0111954416	1	-70	LOC_Os01g21280	conserved hypothetical protein
Lys_grain	1	QEI-sf0111954416	1	-65	LOC_Os01g21290	retrotransposon protein, putative, unclassified
Lys_grain	1	QEI-sf0111954416	1	-53	LOC_Os01g21300	esterase/lipase/thioesterase family protein, putative, expressed
Lys_grain	1	QEI-sf0111954416	1	-48	LOC_Os01g21310	expressed protein
Lys_grain	1	QEI-sf0111954416	1	-44	LOC_Os01g21320	NAD dependent epimerase/dehydratase family domain containing protein, expressed
Lys_grain	1	QEI-sf0111954416	1	-37	LOC_Os01g21340	hypothetical protein
Lys_grain	1	QEI-sf0111954416	1	-23	LOC_Os01g21350	retrotransposon protein, putative, unclassified
Lys_grain	1	QEI-sf0111954416	1	-17	LOC_Os01g21360	retrotransposon protein, putative, unclassified
Lys_grain	1	QEI-sf0111954416	1	-12	LOC_Os01g21370	transposon protein, putative, unclassified
Lys_grain	1	QEI-sf0111954416	1	-9	LOC_Os01g21380	FAD dependent oxidoreductase domain containing protein, expressed
Lys_grain	1	QEI-sf0111954416	1	-8	LOC_Os01g21390	hypothetical protein
Lys_grain	1	QEI-sf0111954416	1	-5	LOC_Os01g21400	retrotransposon protein, putative, unclassified
Lys_grain	1	QEI-sf0111954416	1	1	LOC_Os01g21420	pre-mRNA-splicing factor SF2, putative, expressed
Lys_grain	1	QEI-sf0111954416	1	12	LOC_Os01g21430	retrotransposon protein, putative, Ty3-gypsy subclass
Lys_grain	1	QEI-sf0111954416	1	15	LOC_Os01g21440	expressed protein
Lys_grain	1	QEI-sf0111954416	1	18	LOC_Os01g21450	expressed protein
Lys_grain	1	QEI-sf0111954416	1	37	LOC_Os01g21480	transposon protein, putative, CACTA, En/Spm sub-class
Lys_grain	1	QEI-sf0111954416	1	43	LOC_Os01g21490	transposon protein, putative, CACTA, En/Spm sub-class
Lys_grain	1	QEI-sf0111954416	1	55	LOC_Os01g21500	retrotransposon protein, putative, unclassified
Lys_grain	1	QEI-sf0111954416	1	67	LOC_Os01g21510	transposon protein, putative, CACTA, En/Spm sub-class
Lys_grain	1	QEI-sf0111954416	1	76	LOC_Os01g21520	esterase/lipase/thioesterase family protein, putative
Lys_grain	1	QEI-sf0111954416	1	79	LOC_Os01g21530	retrotransposon protein, putative, unclassified
Lys_grain	1	QEI-sf0111954416	1	88	LOC_Os01g21536	retrotransposon protein, putative, Ty3-gypsy subclass
Lys_grain	1	QEI-sf0111954416	1	97	LOC_Os01g21542	retrotransposon protein, putative, unclassified
Lys_grain	1	QEI-sf0111954416	1	101	LOC_Os01g21550	hypothetical protein
Lys_grain	1	QEI-sf0111954416	1	112	LOC_Os01g21560	esterase/lipase/thioesterase family protein, putative, expressed
Lys_grain	1	QEI-sf0111954416	1	119	LOC_Os01g21580	esterase/lipase/thioesterase family protein, putative, expressed
Lys_grain	2	QEI-sf0118687236	1	-108	LOC_Os01g33750	retrotransposon protein, putative, unclassified
Lys_grain	2	QEI-sf0118687236	1	-105	LOC_Os01g33760	hypothetical protein
Lys_grain	2	QEI-sf0118687236	1	-100	LOC_Os01g33762	expressed protein
Lys_grain	2	QEI-sf0118687236	1	-99	LOC_Os01g33764	hypothetical protein
Lys_grain	2	QEI-sf0118687236	1	-97	LOC_Os01g33770	hypothetical protein
Lys_grain	2	QEI-sf0118687236	1	-90	LOC_Os01g33784	lipase family protein, putative, expressed
Lys_grain	2	QEI-sf0118687236	1	-76	LOC_Os01g33800	heat shock protein DnaJ, putative, expressed
Lys_grain	2	QEI-sf0118687236	1	-71	LOC_Os01g33810	disease resistance protein RPM1, putative, expressed
Lys_grain	2	QEI-sf0118687236	1	-70	LOC_Os01g33820	hypothetical protein
Lys_grain	2	QEI-sf0118687236	1	-67	LOC_Os01g33830	hypothetical protein
Lys_grain	2	QEI-sf0118687236	1	-64	LOC_Os01g33840	heat shock protein binding protein, putative
Lys_grain	2	QEI-sf0118687236	1	-46	LOC_Os01g33869	expressed protein
Lys_grain	2	QEI-sf0118687236	1	-38	LOC_Os01g33900	conserved hypothetical protein
Lys_grain	2	QEI-sf0118687236	1	-35	LOC_Os01g33910	hypothetical protein
Lys_grain	2	QEI-sf0118687236	1	-29	LOC_Os01g33920	hypothetical protein
Lys_grain	2	QEI-sf0118687236	1	-22	LOC_Os01g33930	expressed protein
Lys_grain	2	QEI-sf0118687236	1	-20	LOC_Os01g33940	hypothetical protein
Lys_grain	2	QEI-sf0118687236	1	-12	LOC_Os01g33950	conserved hypothetical protein
Lys_grain	2	QEI-sf0118687236	1	7	LOC_Os01g33970	transposon protein, putative, CACTA, En/Spm sub-class
Lys_grain	2	QEI-sf0118687236	1	13	LOC_Os01g33980	hypothetical protein
Lys_grain	2	QEI-sf0118687236	1	15	LOC_Os01g33990	transposon protein, putative, CACTA, En/Spm sub-class
Lys_grain	2	QEI-sf0118687236	1	22	LOC_Os01g34000	conserved hypothetical protein
Lys_grain	2	QEI-sf0118687236	1	31	LOC_Os01g34010	conserved hypothetical protein
Lys_grain	2	QEI-sf0118687236	1	39	LOC_Os01g34020	retrotransposon protein, putative, unclassified
Lys_grain	2	QEI-sf0118687236	1	42	LOC_Os01g34030	retrotransposon protein, putative, unclassified
Lys_grain	2	QEI-sf0118687236	1	47	LOC_Os01g34040	retrotransposon protein, putative, unclassified
Lys_grain	2	QEI-sf0118687236	1	61	LOC_Os01g34050	expressed protein
Lys_grain	2	QEI-sf0118687236	1	66	LOC_Os01g34060	MYB family transcription factor, putative, expressed
Lys_grain	2	QEI-sf0118687236	1	74	LOC_Os01g34080	armadillo/beta-catenin-like repeat family protein, expressed
Lys_grain	2	QEI-sf0118687236	1	89	LOC_Os01g34090	hypothetical protein
Lys_grain	2	QEI-sf0118687236	1	92	LOC_Os01g34100	expressed protein
Lys_grain	2	QEI-sf0118687236	1	93	LOC_Os01g34110	hypothetical protein
Lys_grain	2	QEI-sf0118687236	1	103	LOC_Os01g34120	hypothetical protein
Lys_grain	2	QEI-sf0118687236	1	107	LOC_Os01g34130	retrotransposon protein, putative, Ty3-gypsy subclass
Lys_grain	3	QEI-sf0203208379	2	-113	LOC_Os02g06190	phytosulfokine receptor precursor, putative, expressed
Lys_grain	3	QEI-sf0203208379	2	-109	LOC_Os02g06200	phytosulfokine receptor precursor, putative, expressed
Lys_grain	3	QEI-sf0203208379	2	-102	LOC_Os02g06205	phytosulfokine receptor precursor, putative, expressed
Lys_grain	3	QEI-sf0203208379	2	-96	LOC_Os02g06210	phytosulfokine receptor precursor, putative, expressed
Lys_grain	3	QEI-sf0203208379	2	-96	LOC_Os02g06215	RNA-directed DNA polymerase, putative
Lys_grain	3	QEI-sf0203208379	2	-94	LOC_Os02g06220	receptor protein kinase-like protein At4g34220 precursor, putative
Lys_grain	3	QEI-sf0203208379	2	-89	LOC_Os02g06230	retrotransposon protein, putative, unclassified
Lys_grain	3	QEI-sf0203208379	2	-87	LOC_Os02g06240	phytosulfokine receptor precursor, putative
Lys_grain	3	QEI-sf0203208379	2	-81	LOC_Os02g06250	phytosulfokine receptor precursor, putative, expressed
Lys_grain	3	QEI-sf0203208379	2	-79	LOC_Os02g06260	phytosulfokine receptor precursor, putative, expressed
Lys_grain	3	QEI-sf0203208379	2	-73	LOC_Os02g06270	phytosulfokine receptor precursor, putative, expressed
Lys_grain	3	QEI-sf0203208379	2	-70	LOC_Os02g06280	receptor-like protein kinase 2 precursor, putative
Lys_grain	3	QEI-sf0203208379	2	-63	LOC_Os02g06290	rhodanese-like domain containing protein, putative, expressed
Lys_grain	3	QEI-sf0203208379	2	-55	LOC_Os02g06300	GTP-binding protein lepA, putative, expressed
Lys_grain	3	QEI-sf0203208379	2	-50	LOC_Os02g06310	hypothetical protein
Lys_grain	3	QEI-sf0203208379	2	-47	LOC_Os02g06320	RNA recognition motif 2 domain containing protein, expressed
Lys_grain	3	QEI-sf0203208379	2	-43	LOC_Os02g06330	AP2 domain containing protein, expressed
Lys_grain	3	QEI-sf0203208379	2	-37	LOC_Os02g06340	EH domain-containing protein 1, putative, expressed
Lys_grain	3	QEI-sf0203208379	2	-33	LOC_Os02g06350	hypothetical protein
Lys_grain	3	QEI-sf0203208379	2	-25	LOC_Os02g06360	uncharacterized protein CPn_0526/CP_0226/CPj0526/CpB0547, putative, expressed
Lys_grain	3	QEI-sf0203208379	2	-21	LOC_Os02g06370	whirly transcription factor domain containing protein, expressed
Lys_grain	3	QEI-sf0203208379	2	-18	LOC_Os02g06380	plant-specific domain TIGR01627 family protein, expressed
Lys_grain	3	QEI-sf0203208379	2	-14	LOC_Os02g06390	expressed protein
Lys_grain	3	QEI-sf0203208379	2	-5	LOC_Os02g06400	growth regulator related protein, putative, expressed
Lys_grain	3	QEI-sf0203208379	2	-2	LOC_Os02g06410	CBS domain containing membrane protein, putative, expressed
Lys_grain	3	QEI-sf0203208379	2	0	LOC_Os02g06420	conserved hypothetical protein
Lys_grain	3	QEI-sf0203208379	2	4	LOC_Os02g06430	DUF292 domain containing protein, expressed
Lys_grain	3	QEI-sf0203208379	2	8	LOC_Os02g06440	hypothetical protein
Lys_grain	3	QEI-sf0203208379	2	10	LOC_Os02g06450	coiled-coil domain-containing protein 72, putative
Lys_grain	3	QEI-sf0203208379	2	12	LOC_Os02g06460	conserved hypothetical protein
Lys_grain	3	QEI-sf0203208379	2	19	LOC_Os02g06470	OsFBX38 - F-box domain containing protein, expressed
Lys_grain	3	QEI-sf0203208379	2	19	LOC_Os02g06480	SCO1 protein homolog, mitochondrial precursor, putative, expressed
Lys_grain	3	QEI-sf0203208379	2	25	LOC_Os02g06490	vacuolar protein sorting-associated protein 4, putative, expressed
Lys_grain	3	QEI-sf0203208379	2	29	LOC_Os02g06500	DSHCT domain containing protein, expressed
Lys_grain	3	QEI-sf0203208379	2	43	LOC_Os02g06510	myosin heavy chain, putative, expressed
Lys_grain	3	QEI-sf0203208379	2	46	LOC_Os02g06520	OsFBLD1 - F-box, LRR and FBD domain containing protein, expressed
Lys_grain	3	QEI-sf0203208379	2	55	LOC_Os02g06530	armadillo/beta-catenin repeat family protein, putative, expressed
Lys_grain	3	QEI-sf0203208379	2	57	LOC_Os02g06540	transporter family protein, putative, expressed
Lys_grain	3	QEI-sf0203208379	2	62	LOC_Os02g06550	retrotransposon, putative, centromere-specific, expressed
Lys_grain	3	QEI-sf0203208379	2	71	LOC_Os02g06560	wound induced protein, putative, expressed
Lys_grain	3	QEI-sf0203208379	2	74	LOC_Os02g06570	CAMK_KIN1/SNF1/Nim1_like.13 - CAMK includes calcium/calmodulin depedent protein kinases, expressed
Lys_grain	3	QEI-sf0203208379	2	82	LOC_Os02g06580	formin, putative, expressed
Lys_grain	3	QEI-sf0203208379	2	88	LOC_Os02g06584	zinc finger C-x8-C-x5-C-x3-H type family protein, expressed
Lys_grain	3	QEI-sf0203208379	2	102	LOC_Os02g06588	ATP binding protein, putative, expressed
Lys_grain	3	QEI-sf0203208379	2	105	LOC_Os02g06592	SNF2 family N-terminal domain containing protein, expressed
Lys_grain	3	QEI-sf0203208379	2	114	LOC_Os02g06600	receptor-like protein kinase 2 precursor, putative
Lys_grain	3	QEI-sf0203208379	2	119	LOC_Os02g06605	expressed protein
Lys_grain	3	QEI-sf0203208379	2	120	LOC_Os02g06610	hypothetical protein
Lys_grain	4	QEI-sf0421301518	4	-111	LOC_Os04g35140	OsSub41 - Putative Subtilisin homologue, expressed
Lys_grain	4	QEI-sf0421301518	4	-108	LOC_Os04g35150	thioredoxin, putative
Lys_grain	4	QEI-sf0421301518	4	-101	LOC_Os04g35160	CorA-like magnesium transporter protein, putative, expressed
Lys_grain	4	QEI-sf0421301518	4	-95	LOC_Os04g35170	expressed protein
Lys_grain	4	QEI-sf0421301518	4	-93	LOC_Os04g35180	co-chaperone GrpE protein, putative, expressed
Lys_grain	4	QEI-sf0421301518	4	-87	LOC_Os04g35190	OsFBX133 - F-box domain containing protein, expressed
Lys_grain	4	QEI-sf0421301518	4	-85	LOC_Os04g35200	expressed protein
Lys_grain	4	QEI-sf0421301518	4	-71	LOC_Os04g35210	Leucine Rich Repeat family protein, expressed
Lys_grain	4	QEI-sf0421301518	4	-68	LOC_Os04g35220	expressed protein
Lys_grain	4	QEI-sf0421301518	4	-61	LOC_Os04g35230	hypothetical protein
Lys_grain	4	QEI-sf0421301518	4	-53	LOC_Os04g35240	CAMK_CAMK_like.25 - CAMK includes calcium/calmodulin depedent protein kinases, expressed
Lys_grain	4	QEI-sf0421301518	4	-47	LOC_Os04g35250	MONOCULM 1, putative
Lys_grain	4	QEI-sf0421301518	4	-28	LOC_Os04g35260	DEAD/DEAH box helicase domain containing protein, expressed
Lys_grain	4	QEI-sf0421301518	4	-24	LOC_Os04g35270	alpha-1,4-fucosyltransferase, putative, expressed
Lys_grain	4	QEI-sf0421301518	4	-17	LOC_Os04g35280	neutral/alkaline invertase, putative, expressed
Lys_grain	4	QEI-sf0421301518	4	-8	LOC_Os04g35290	OsPDIL5-2 protein disulfide isomerase PDIL5-2, expressed
Lys_grain	4	QEI-sf0421301518	4	-4	LOC_Os04g35300	SLL1 protein, putative, expressed
Lys_grain	4	QEI-sf0421301518	4	-2	LOC_Os04g35305	tetratricopeptide-like helical, putative
Lys_grain	4	QEI-sf0421301518	4	6	LOC_Os04g35320	retrotransposon protein, putative, unclassified
Lys_grain	4	QEI-sf0421301518	4	10	LOC_Os04g35330	retrotransposon protein, putative, unclassified
Lys_grain	4	QEI-sf0421301518	4	18	LOC_Os04g35340	MrBTB1 - Bric-a-Brac, Tramtrack, Broad Complex BTB domain with Meprin and TRAF Homology MATH-related domain, expressed
Lys_grain	4	QEI-sf0421301518	4	20	LOC_Os04g35350	expressed protein
Lys_grain	4	QEI-sf0421301518	4	32	LOC_Os04g35370	MBTB5 - Bric-a-Brac, Tramtrack, Broad Complex BTB domain with Meprin and TRAF Homology MATH domain, expressed
Lys_grain	4	QEI-sf0421301518	4	40	LOC_Os04g35380	expressed protein
Lys_grain	4	QEI-sf0421301518	4	52	LOC_Os04g35390	hypothetical protein
Lys_grain	4	QEI-sf0421301518	4	65	LOC_Os04g35410	expressed protein
Lys_grain	4	QEI-sf0421301518	4	73	LOC_Os04g35420	helicase conserved C-terminal domain containing protein, expressed
Lys_grain	4	QEI-sf0421301518	4	85	LOC_Os04g35430	PHD-finger domain containing protein, expressed
Lys_grain	4	QEI-sf0421301518	4	96	LOC_Os04g35440	retrotransposon protein, putative, unclassified
Lys_grain	4	QEI-sf0421301518	4	102	LOC_Os04g35450	retrotransposon protein, putative, unclassified
Lys_grain	4	QEI-sf0421301518	4	105	LOC_Os04g35460	retrotransposon protein, putative, unclassified
Lys_grain	4	QEI-sf0421301518	4	110	LOC_Os04g35470	retrotransposon protein, putative, unclassified
Lys_grain	4	QEI-sf0421301518	4	118	LOC_Os04g35480	CDK5RAP1, putative, expressed
Lys_grain	5	QEI-sf0508260021	5	-118	LOC_Os05g14430	retrotransposon protein, putative, unclassified
Lys_grain	5	QEI-sf0508260021	5	-112	LOC_Os05g14440	transposon protein, putative, Ac/Ds sub-class
Lys_grain	5	QEI-sf0508260021	5	-96	LOC_Os05g14450	transposon protein, putative, CACTA, En/Spm sub-class
Lys_grain	5	QEI-sf0508260021	5	-89	LOC_Os05g14460	transposon protein, putative, CACTA, En/Spm sub-class
Lys_grain	5	QEI-sf0508260021	5	-85	LOC_Os05g14470	hypothetical protein
Lys_grain	5	QEI-sf0508260021	5	-81	LOC_Os05g14480	conserved hypothetical protein
Lys_grain	5	QEI-sf0508260021	5	-76	LOC_Os05g14490	hypothetical protein
Lys_grain	5	QEI-sf0508260021	5	-61	LOC_Os05g14500	conserved hypothetical protein
Lys_grain	5	QEI-sf0508260021	5	-47	LOC_Os05g14510	retrotransposon protein, putative, unclassified
Lys_grain	5	QEI-sf0508260021	5	-37	LOC_Os05g14520	retrotransposon protein, putative, unclassified
Lys_grain	5	QEI-sf0508260021	5	-17	LOC_Os05g14530	retrotransposon protein, putative, unclassified
Lys_grain	5	QEI-sf0508260021	5	-11	LOC_Os05g14540	hypothetical protein
Lys_grain	5	QEI-sf0508260021	5	16	LOC_Os05g14550	Phosphatidylinositol kinase and FAT containing domain protein, putative, expressed
Lys_grain	5	QEI-sf0508260021	5	32	LOC_Os05g14560	transposon protein, putative, CACTA, En/Spm sub-class
Lys_grain	5	QEI-sf0508260021	5	40	LOC_Os05g14570	NAP domain containing protein, putative
Lys_grain	5	QEI-sf0508260021	5	44	LOC_Os05g14580	conserved hypothetical protein
Lys_grain	5	QEI-sf0508260021	5	52	LOC_Os05g14590	MCM6 - Putative minichromosome maintenance MCM complex subunit 6, expressed
Lys_grain	5	QEI-sf0508260021	5	60	LOC_Os05g14600	retrotransposon protein, putative, unclassified
Lys_grain	5	QEI-sf0508260021	5	64	LOC_Os05g14610	retrotransposon protein, putative, unclassified
Lys_grain	5	QEI-sf0508260021	5	68	LOC_Os05g14620	retrotransposon protein, putative, unclassified
Lys_grain	5	QEI-sf0508260021	5	72	LOC_Os05g14640	retrotransposon protein, putative, unclassified
Lys_grain	5	QEI-sf0508260021	5	75	LOC_Os05g14650	retrotransposon protein, putative, unclassified
Lys_grain	5	QEI-sf0508260021	5	79	LOC_Os05g14660	retrotransposon protein, putative, unclassified
Lys_grain	5	QEI-sf0508260021	5	80	LOC_Os05g14670	retrotransposon protein, putative, unclassified
Lys_grain	5	QEI-sf0508260021	5	85	LOC_Os05g14680	conserved hypothetical protein
Lys_grain	5	QEI-sf0508260021	5	89	LOC_Os05g14690	retrotransposon protein, putative, unclassified
Lys_grain	5	QEI-sf0508260021	5	95	LOC_Os05g14700	hypothetical protein
Lys_grain	5	QEI-sf0508260021	5	98	LOC_Os05g14710	hypothetical protein
Lys_grain	5	QEI-sf0508260021	5	103	LOC_Os05g14720	hypothetical protein
Lys_grain	5	QEI-sf0508260021	5	107	LOC_Os05g14730	cyclin-A1, putative, expressed
Lys_grain	5	QEI-sf0508260021	5	114	LOC_Os05g14740	expressed protein
Lys_grain	6	QEI-sf0510559350	5	-112	LOC_Os05g18170	retrotransposon, putative, centromere-specific
Lys_grain	6	QEI-sf0510559350	5	-110	LOC_Os05g18180	retrotransposon, putative, centromere-specific
Lys_grain	6	QEI-sf0510559350	5	-106	LOC_Os05g18190	retrotransposon protein, putative, Ty3-gypsy subclass
Lys_grain	6	QEI-sf0510559350	5	-86	LOC_Os05g18200	retrotransposon protein, putative, Ty3-gypsy subclass
Lys_grain	6	QEI-sf0510559350	5	-82	LOC_Os05g18210	retrotransposon protein, putative, Ty3-gypsy subclass
Lys_grain	6	QEI-sf0510559350	5	-80	LOC_Os05g18220	retrotransposon protein, putative, unclassified
Lys_grain	6	QEI-sf0510559350	5	-71	LOC_Os05g18230	retrotransposon protein, putative, Ty3-gypsy subclass
Lys_grain	6	QEI-sf0510559350	5	-66	LOC_Os05g18240	retrotransposon protein, putative, Ty3-gypsy subclass
Lys_grain	6	QEI-sf0510559350	5	-56	LOC_Os05g18250	retrotransposon, putative, centromere-specific
Lys_grain	6	QEI-sf0510559350	5	-52	LOC_Os05g18260	retrotransposon protein, putative, unclassified
Lys_grain	6	QEI-sf0510559350	5	-46	LOC_Os05g18270	retrotransposon protein, putative, unclassified
Lys_grain	6	QEI-sf0510559350	5	-31	LOC_Os05g18274	expressed protein
Lys_grain	6	QEI-sf0510559350	5	-25	LOC_Os05g18280	kelch domain containing protein, putative
Lys_grain	6	QEI-sf0510559350	5	-12	LOC_Os05g18294	SEC14 cytosolic factor family protein, putative, expressed
Lys_grain	6	QEI-sf0510559350	5	-7	LOC_Os05g18310	retrotransposon protein, putative, Ty3-gypsy subclass
Lys_grain	6	QEI-sf0510559350	5	-5	LOC_Os05g18320	transposon protein, putative, unclassified
Lys_grain	6	QEI-sf0510559350	5	0	LOC_Os05g18330	retrotransposon protein, putative, Ty3-gypsy subclass
Lys_grain	6	QEI-sf0510559350	5	20	LOC_Os05g18350	retrotransposon, putative, centromere-specific
Lys_grain	6	QEI-sf0510559350	5	23	LOC_Os05g18360	retrotransposon protein, putative, unclassified
Lys_grain	6	QEI-sf0510559350	5	25	LOC_Os05g18370	retrotransposon protein, putative, unclassified
Lys_grain	6	QEI-sf0510559350	5	37	LOC_Os05g18380	retrotransposon protein, putative, Ty3-gypsy subclass
Lys_grain	6	QEI-sf0510559350	5	51	LOC_Os05g18390	retrotransposon protein, putative, Ty3-gypsy subclass
Lys_grain	6	QEI-sf0510559350	5	78	LOC_Os05g18400	retrotransposon protein, putative, unclassified
Lys_grain	6	QEI-sf0510559350	5	82	LOC_Os05g18410	retrotransposon protein, putative, Ty1-copia subclass
Lys_grain	6	QEI-sf0510559350	5	92	LOC_Os05g18419	retrotransposon, putative, centromere-specific
Lys_grain	6	QEI-sf0510559350	5	94	LOC_Os05g18428	retrotransposon protein, putative, Ty3-gypsy subclass, expressed
Lys_grain	6	QEI-sf0510559350	5	100	LOC_Os05g18437	retrotransposon, putative, centromere-specific
Lys_grain	6	QEI-sf0510559350	5	102	LOC_Os05g18446	retrotransposon protein, putative, Ty3-gypsy subclass, expressed
Lys_grain	6	QEI-sf0510559350	5	109	LOC_Os05g18455	retrotransposon, putative, centromere-specific
Lys_grain	6	QEI-sf0510559350	5	112	LOC_Os05g18470	CRAL/TRIO domain containing protein, expressed
Lys_grain	7	QEI-sf0519452033	5	-119	LOC_Os05g33070	conserved hypothetical protein
Lys_grain	7	QEI-sf0519452033	5	-110	LOC_Os05g33080	serine/threonine-protein kinase, putative, expressed
Lys_grain	7	QEI-sf0519452033	5	-107	LOC_Os05g33090	conserved hypothetical protein
Lys_grain	7	QEI-sf0519452033	5	-100	LOC_Os05g33100	endo-1,3;1,4-beta-D-glucanase precursor, putative, expressed
Lys_grain	7	QEI-sf0519452033	5	-91	LOC_Os05g33110	endo-1,3;1,4-beta-D-glucanase precursor, putative, expressed
Lys_grain	7	QEI-sf0519452033	5	-93	LOC_Os05g33120	retrotransposon protein, putative, unclassified, expressed
Lys_grain	7	QEI-sf0519452033	5	-86	LOC_Os05g33130	CHIT17 - Chitinase family protein precursor, expressed
Lys_grain	7	QEI-sf0519452033	5	-77	LOC_Os05g33140	CHIT5 - Chitinase family protein precursor, expressed
Lys_grain	7	QEI-sf0519452033	5	-67	LOC_Os05g33150	CHIT6 - Chitinase family protein precursor, expressed
Lys_grain	7	QEI-sf0519452033	5	-64	LOC_Os05g33160	inactive receptor kinase At1g27190 precursor, putative, expressed
Lys_grain	7	QEI-sf0519452033	5	-60	LOC_Os05g33170	conserved hypothetical protein
Lys_grain	7	QEI-sf0519452033	5	-57	LOC_Os05g33180	hypothetical protein
Lys_grain	7	QEI-sf0519452033	5	-46	LOC_Os05g33190	endo-1,3;1,4-beta-D-glucanase precursor, putative, expressed
Lys_grain	7	QEI-sf0519452033	5	-41	LOC_Os05g33200	endo-1,3;1,4-beta-D-glucanase precursor, putative, expressed
Lys_grain	7	QEI-sf0519452033	5	-36	LOC_Os05g33210	cytochrome b-c1 complex subunit 9, putative, expressed
Lys_grain	7	QEI-sf0519452033	5	-32	LOC_Os05g33220	AWPM-19-like membrane family protein, putative, expressed
Lys_grain	7	QEI-sf0519452033	5	-25	LOC_Os05g33230	cobalt ion transporter, putative, expressed
Lys_grain	7	QEI-sf0519452033	5	-23	LOC_Os05g33240	DNA-directed RNA polymerase II subunit RPB7, putative, expressed
Lys_grain	7	QEI-sf0519452033	5	-16	LOC_Os05g33260	1-5-phosphoribosyl-5-5-phosphoribosylaminomethylideneaminoimidazole-4-carboxamide isomerase, chloroplast precursor, putative, expressed
Lys_grain	7	QEI-sf0519452033	5	-7	LOC_Os05g33270	GDSL-like lipase/acylhydrolase, putative, expressed
Lys_grain	7	QEI-sf0519452033	5	-5	LOC_Os05g33280	thylakoid lumen protein, putative, expressed
Lys_grain	7	QEI-sf0519452033	5	0	LOC_Os05g33290	uncharacterized conserved membrane protein specific to cyanobacteria, putative, expressed
Lys_grain	7	QEI-sf0519452033	5	11	LOC_Os05g33310	oxidoreductase, 2OG-Fe oxygenase family protein, putative, expressed
Lys_grain	7	QEI-sf0519452033	5	16	LOC_Os05g33320	expressed protein
Lys_grain	7	QEI-sf0519452033	5	38	LOC_Os05g33330	transposon protein, putative, CACTA, En/Spm sub-class
Lys_grain	7	QEI-sf0519452033	5	40	LOC_Os05g33340	transposon protein, putative, CACTA, En/Spm sub-class
Lys_grain	7	QEI-sf0519452033	5	69	LOC_Os05g33350	hypothetical protein
Lys_grain	7	QEI-sf0519452033	5	73	LOC_Os05g33360	transmembrane BAX inhibitor motif-containing protein, putative, expressed
Lys_grain	7	QEI-sf0519452033	5	85	LOC_Os05g33370	transposon protein, putative, unclassified
Lys_grain	7	QEI-sf0519452033	5	92	LOC_Os05g33380	fructose-bisphospate aldolase isozyme, putative, expressed
Lys_grain	7	QEI-sf0519452033	5	94	LOC_Os05g33390	cation-transporting ATPase, putative, expressed
Lys_grain	7	QEI-sf0519452033	5	117	LOC_Os05g33400	basic 7S globulin precursor, putative, expressed
Lys_grain	7	QEI-sf0519452033	5	119	LOC_Os05g33410	xylanase inhibitor, putative, expressed
Lys_grain	8	QEI-sf0519512601	5	-118	LOC_Os05g33180	hypothetical protein
Lys_grain	8	QEI-sf0519512601	5	-107	LOC_Os05g33190	endo-1,3;1,4-beta-D-glucanase precursor, putative, expressed
Lys_grain	8	QEI-sf0519512601	5	-102	LOC_Os05g33200	endo-1,3;1,4-beta-D-glucanase precursor, putative, expressed
Lys_grain	8	QEI-sf0519512601	5	-96	LOC_Os05g33210	cytochrome b-c1 complex subunit 9, putative, expressed
Lys_grain	8	QEI-sf0519512601	5	-92	LOC_Os05g33220	AWPM-19-like membrane family protein, putative, expressed
Lys_grain	8	QEI-sf0519512601	5	-86	LOC_Os05g33230	cobalt ion transporter, putative, expressed
Lys_grain	8	QEI-sf0519512601	5	-84	LOC_Os05g33240	DNA-directed RNA polymerase II subunit RPB7, putative, expressed
Lys_grain	8	QEI-sf0519512601	5	-77	LOC_Os05g33260	1-5-phosphoribosyl-5-5-phosphoribosylaminomethylideneaminoimidazole-4-carboxamide isomerase, chloroplast precursor, putative, expressed
Lys_grain	8	QEI-sf0519512601	5	-67	LOC_Os05g33270	GDSL-like lipase/acylhydrolase, putative, expressed
Lys_grain	8	QEI-sf0519512601	5	-66	LOC_Os05g33280	thylakoid lumen protein, putative, expressed
Lys_grain	8	QEI-sf0519512601	5	-60	LOC_Os05g33290	uncharacterized conserved membrane protein specific to cyanobacteria, putative, expressed
Lys_grain	8	QEI-sf0519512601	5	-57	LOC_Os05g33300	tat pathway signal sequence family protein, expressed
Lys_grain	8	QEI-sf0519512601	5	-46	LOC_Os05g33310	oxidoreductase, 2OG-Fe oxygenase family protein, putative, expressed
Lys_grain	8	QEI-sf0519512601	5	-41	LOC_Os05g33320	expressed protein
Lys_grain	8	QEI-sf0519512601	5	-20	LOC_Os05g33330	transposon protein, putative, CACTA, En/Spm sub-class
Lys_grain	8	QEI-sf0519512601	5	-5	LOC_Os05g33340	transposon protein, putative, CACTA, En/Spm sub-class
Lys_grain	8	QEI-sf0519512601	5	8	LOC_Os05g33350	hypothetical protein
Lys_grain	8	QEI-sf0519512601	5	13	LOC_Os05g33360	transmembrane BAX inhibitor motif-containing protein, putative, expressed
Lys_grain	8	QEI-sf0519512601	5	24	LOC_Os05g33370	transposon protein, putative, unclassified
Lys_grain	8	QEI-sf0519512601	5	31	LOC_Os05g33380	fructose-bisphospate aldolase isozyme, putative, expressed
Lys_grain	8	QEI-sf0519512601	5	34	LOC_Os05g33390	cation-transporting ATPase, putative, expressed
Lys_grain	8	QEI-sf0519512601	5	56	LOC_Os05g33400	basic 7S globulin precursor, putative, expressed
Lys_grain	8	QEI-sf0519512601	5	59	LOC_Os05g33410	xylanase inhibitor, putative, expressed
Lys_grain	8	QEI-sf0519512601	5	63	LOC_Os05g33420	xyloglucanase inhibitor, putative
Lys_grain	8	QEI-sf0519512601	5	70	LOC_Os05g33430	xyloglucanase inhibitor, putative, expressed
Lys_grain	8	QEI-sf0519512601	5	74	LOC_Os05g33440	mTERF domain containing protein, expressed
Lys_grain	8	QEI-sf0519512601	5	78	LOC_Os05g33450	xanthine/uracil/vitamin C permease, putative
Lys_grain	8	QEI-sf0519512601	5	81	LOC_Os05g33460	mTERF domain containing protein, expressed
Lys_grain	8	QEI-sf0519512601	5	86	LOC_Os05g33470	hypothetical protein
Lys_grain	8	QEI-sf0519512601	5	92	LOC_Os05g33480	retrotransposon protein, putative, unclassified
Lys_grain	8	QEI-sf0519512601	5	96	LOC_Os05g33490	retrotransposon protein, putative, Ty3-gypsy subclass
Lys_grain	8	QEI-sf0519512601	5	103	LOC_Os05g33500	mTERF domain containing protein, expressed
Lys_grain	8	QEI-sf0519512601	5	106	LOC_Os05g33510	peptide methionine sulfoxide reductase msrB, putative, expressed
Lys_grain	8	QEI-sf0519512601	5	109	LOC_Os05g33514	expressed protein
Lys_grain	8	QEI-sf0519512601	5	116	LOC_Os05g33520	expressed protein
Lys_grain	9	QEI-sf0609623346	6	-104	LOC_Os06g16570	transposon protein, putative, CACTA, En/Spm sub-class, expressed
Lys_grain	9	QEI-sf0609623346	6	-98	LOC_Os06g16580	transposon protein, putative, CACTA, En/Spm sub-class
Lys_grain	9	QEI-sf0609623346	6	-92	LOC_Os06g16590	hypothetical protein
Lys_grain	9	QEI-sf0609623346	6	-79	LOC_Os06g16600	RNA-directed DNA polymerase, putative
Lys_grain	9	QEI-sf0609623346	6	-73	LOC_Os06g16610	hypothetical protein
Lys_grain	9	QEI-sf0609623346	6	-71	LOC_Os06g16620	hypothetical protein
Lys_grain	9	QEI-sf0609623346	6	-68	LOC_Os06g16630	hypothetical protein
Lys_grain	9	QEI-sf0609623346	6	-57	LOC_Os06g16640	carboxyl-terminal peptidase, putative, expressed
Lys_grain	9	QEI-sf0609623346	6	-50	LOC_Os06g16650	hypothetical protein
Lys_grain	9	QEI-sf0609623346	6	-31	LOC_Os06g16660	transposon protein, putative, CACTA, En/Spm sub-class
Lys_grain	9	QEI-sf0609623346	6	-24	LOC_Os06g16670	transposon protein, putative, CACTA, En/Spm sub-class, expressed
Lys_grain	9	QEI-sf0609623346	6	-8	LOC_Os06g16680	transposon protein, putative, CACTA, En/Spm sub-class
Lys_grain	9	QEI-sf0609623346	6	-2	LOC_Os06g16690	transposon protein, putative, CACTA, En/Spm sub-class
Lys_grain	9	QEI-sf0609623346	6	13	LOC_Os06g16710	transposon protein, putative, CACTA, En/Spm sub-class
Lys_grain	9	QEI-sf0609623346	6	21	LOC_Os06g16720	transposon protein, putative, CACTA, En/Spm sub-class
Lys_grain	9	QEI-sf0609623346	6	26	LOC_Os06g16730	hypothetical protein
Lys_grain	9	QEI-sf0609623346	6	30	LOC_Os06g16740	hypothetical protein
Lys_grain	9	QEI-sf0609623346	6	47	LOC_Os06g16750	hypothetical protein
Lys_grain	9	QEI-sf0609623346	6	85	LOC_Os06g16760	hypothetical protein
Lys_grain	9	QEI-sf0609623346	6	88	LOC_Os06g16770	expressed protein
Lys_grain	9	QEI-sf0609623346	6	89	LOC_Os06g16780	hypothetical protein
Lys_grain	9	QEI-sf0609623346	6	90	LOC_Os06g16790	go35 NBS-LRR, putative, expressed
Lys_grain	9	QEI-sf0609623346	6	110	LOC_Os06g16810	polygalacturonase precursor, putative
Lys_grain	9	QEI-sf0609623346	6	118	LOC_Os06g16820	hypothetical protein
Lys_grain	9	QEI-sf0609623346	6	120	LOC_Os06g16830	retrotransposon protein, putative, Ty1-copia subclass
Lys_grain	10	QEI-sf0817597165	8	-117	LOC_Os08g28610	hypothetical protein
Lys_grain	10	QEI-sf0817597165	8	-112	LOC_Os08g28620	retrotransposon protein, putative, unclassified
Lys_grain	10	QEI-sf0817597165	8	-103	LOC_Os08g28630	retrotransposon protein, putative, Ty3-gypsy subclass
Lys_grain	10	QEI-sf0817597165	8	-100	LOC_Os08g28640	retrotransposon protein, putative, Ty3-gypsy subclass
Lys_grain	10	QEI-sf0817597165	8	-97	LOC_Os08g28650	retrotransposon protein, putative, Ty3-gypsy subclass
Lys_grain	10	QEI-sf0817597165	8	-92	LOC_Os08g28660	hypothetical protein
Lys_grain	10	QEI-sf0817597165	8	-88	LOC_Os08g28670	pathogenesis-related Bet v I family protein, putative, expressed
Lys_grain	10	QEI-sf0817597165	8	-83	LOC_Os08g28680	ubiquitin-conjugating enzyme, putative, expressed
Lys_grain	10	QEI-sf0817597165	8	-76	LOC_Os08g28690	expressed protein
Lys_grain	10	QEI-sf0817597165	8	-58	LOC_Os08g28700	dnaJ domain containing protein, expressed
Lys_grain	10	QEI-sf0817597165	8	-39	LOC_Os08g28710	receptor protein kinase CRINKLY4 precursor, putative, expressed
Lys_grain	10	QEI-sf0817597165	8	-33	LOC_Os08g28720	retrotransposon protein, putative, unclassified
Lys_grain	10	QEI-sf0817597165	8	-23	LOC_Os08g28730	NAD dependent epimerase/dehydratase family protein, putative, expressed
Lys_grain	10	QEI-sf0817597165	8	-16	LOC_Os08g28740	conserved hypothetical protein
Lys_grain	10	QEI-sf0817597165	8	-7	LOC_Os08g28750	transposon protein, putative, CACTA, En/Spm sub-class
Lys_grain	10	QEI-sf0817597165	8	-3	LOC_Os08g28760	transposon protein, putative, CACTA, En/Spm sub-class
Lys_grain	10	QEI-sf0817597165	8	4	LOC_Os08g28780	SKP1, putative
Lys_grain	10	QEI-sf0817597165	8	6	LOC_Os08g28784	expressed protein
Lys_grain	10	QEI-sf0817597165	8	13	LOC_Os08g28790	dirigent, putative, expressed
Lys_grain	10	QEI-sf0817597165	8	18	LOC_Os08g28800	Skp1 family, dimerisation domain containing protein
Lys_grain	10	QEI-sf0817597165	8	21	LOC_Os08g28810	hypothetical protein
Lys_grain	10	QEI-sf0817597165	8	25	LOC_Os08g28820	Skp1 family, dimerisation domain containing protein, expressed
Lys_grain	10	QEI-sf0817597165	8	28	LOC_Os08g28830	pentatricopeptide, putative, expressed
Lys_grain	10	QEI-sf0817597165	8	34	LOC_Os08g28840	hydrolase, NUDIX family, domain containing protein, expressed
Lys_grain	10	QEI-sf0817597165	8	39	LOC_Os08g28850	hypothetical protein
Lys_grain	10	QEI-sf0817597165	8	43	LOC_Os08g28860	hydrolase, NUDIX family, domain containing protein, expressed
Lys_grain	10	QEI-sf0817597165	8	50	LOC_Os08g28870	receptor-like protein kinase 5 precursor, putative, expressed
Lys_grain	10	QEI-sf0817597165	8	63	LOC_Os08g28880	patatin, putative, expressed
Lys_grain	10	QEI-sf0817597165	8	72	LOC_Os08g28890	protein kinase family protein, putative, expressed
Lys_grain	10	QEI-sf0817597165	8	78	LOC_Os08g28900	OsRR8 type-A response regulator, expressed
Lys_grain	10	QEI-sf0817597165	8	83	LOC_Os08g28920	hypothetical protein
Lys_grain	10	QEI-sf0817597165	8	87	LOC_Os08g28930	retrotransposon protein, putative, unclassified
Lys_grain	10	QEI-sf0817597165	8	99	LOC_Os08g28940	OsFBX289 - F-box domain containing protein, expressed
Lys_grain	10	QEI-sf0817597165	8	114	LOC_Os08g28950	response regulator receiver domain containing protein, expressed
Lys_grain	11	QEI-sf0822241593	8	-117	LOC_Os08g35100	hypothetical protein
Lys_grain	11	QEI-sf0822241593	8	-106	LOC_Os08g35110	OsSAUR33 - Auxin-responsive SAUR gene family member, expressed
Lys_grain	11	QEI-sf0822241593	8	-98	LOC_Os08g35120	hypothetical protein
Lys_grain	11	QEI-sf0822241593	8	-95	LOC_Os08g35130	hypothetical protein
Lys_grain	11	QEI-sf0822241593	8	-93	LOC_Os08g35140	hypothetical protein
Lys_grain	11	QEI-sf0822241593	8	-89	LOC_Os08g35150	hypothetical protein
Lys_grain	11	QEI-sf0822241593	8	-82	LOC_Os08g35160	heat shock protein DnaJ, putative, expressed
Lys_grain	11	QEI-sf0822241593	8	-73	LOC_Os08g35170	retrotransposon protein, putative, Ty1-copia subclass
Lys_grain	11	QEI-sf0822241593	8	-68	LOC_Os08g35180	ECAGL4 - ECA1 gametogenesis related family protein precursor, putative
Lys_grain	11	QEI-sf0822241593	8	-52	LOC_Os08g35190	auxin-repressed protein, putative, expressed
Lys_grain	11	QEI-sf0822241593	8	-41	LOC_Os08g35200	hypothetical protein
Lys_grain	11	QEI-sf0822241593	8	-23	LOC_Os08g35210	ferric reductase, putative, expressed
Lys_grain	11	QEI-sf0822241593	8	-16	LOC_Os08g35220	cyclin-dependent kinase C-3, putative, expressed
Lys_grain	11	QEI-sf0822241593	8	-8	LOC_Os08g35230	hypothetical protein
Lys_grain	11	QEI-sf0822241593	8	-7	LOC_Os08g35240	AP2 domain containing protein
Lys_grain	11	QEI-sf0822241593	8	3	LOC_Os08g35260	hypothetical protein
Lys_grain	11	QEI-sf0822241593	8	12	LOC_Os08g35270	retrotransposon protein, putative, Ty3-gypsy subclass
Lys_grain	11	QEI-sf0822241593	8	24	LOC_Os08g35280	retrotransposon protein, putative, Ty3-gypsy subclass
Lys_grain	11	QEI-sf0822241593	8	25	LOC_Os08g35290	retrotransposon protein, putative, unclassified
Lys_grain	11	QEI-sf0822241593	8	31	LOC_Os08g35300	expressed protein
Lys_grain	11	QEI-sf0822241593	8	32	LOC_Os08g35305	expressed protein
Lys_grain	11	QEI-sf0822241593	8	33	LOC_Os08g35310	O-methyltransferase, putative
Lys_grain	11	QEI-sf0822241593	8	36	LOC_Os08g35319	expressed protein
Lys_grain	11	QEI-sf0822241593	8	41	LOC_Os08g35330	hypothetical protein
Lys_grain	11	QEI-sf0822241593	8	44	LOC_Os08g35340	retrotransposon protein, putative, unclassified
Lys_grain	11	QEI-sf0822241593	8	47	LOC_Os08g35350	hypothetical protein
Lys_grain	11	QEI-sf0822241593	8	51	LOC_Os08g35360	hypothetical protein
Lys_grain	11	QEI-sf0822241593	8	52	LOC_Os08g35370	transposon protein, putative, CACTA, En/Spm sub-class
Lys_grain	11	QEI-sf0822241593	8	61	LOC_Os08g35380	retrotransposon protein, putative, unclassified
Lys_grain	11	QEI-sf0822241593	8	64	LOC_Os08g35390	retrotransposon protein, putative, unclassified
Lys_grain	11	QEI-sf0822241593	8	71	LOC_Os08g35400	hypothetical protein
Lys_grain	11	QEI-sf0822241593	8	75	LOC_Os08g35410	hypothetical protein
Lys_grain	11	QEI-sf0822241593	8	80	LOC_Os08g35420	photosynthetic reaction center protein, putative, expressed
Lys_grain	11	QEI-sf0822241593	8	89	LOC_Os08g35430	hypothetical protein
Lys_grain	11	QEI-sf0822241593	8	90	LOC_Os08g35440	Ser/Thr protein phosphatase family protein, putative, expressed
Lys_grain	11	QEI-sf0822241593	8	101	LOC_Os08g35450	retrotransposon protein, putative, unclassified
Lys_grain	11	QEI-sf0822241593	8	107	LOC_Os08g35460	hypothetical protein
Lys_grain	11	QEI-sf0822241593	8	108	LOC_Os08g35470	exo70 exocyst complex subunit, putative, expressed
Lys_grain	11	QEI-sf0822241593	8	114	LOC_Os08g35480	cupin superfamily protein, putative, expressed
Lys_grain	11	QEI-sf0822241593	8	118	LOC_Os08g35490	ctr copper transporter family protein, putative
Lys_grain	11	QEI-sf0822241593	8	120	LOC_Os08g35500	hypothetical protein
Lys_grain	12	QEI-sf0828052927	8	-114	LOC_Os08g44400	glutathione S-transferase, N-terminal domain containing protein, expressed
Lys_grain	12	QEI-sf0828052927	8	-112	LOC_Os08g44410	harpin-induced protein 1 domain containing protein, expressed
Lys_grain	12	QEI-sf0828052927	8	-106	LOC_Os08g44420	kinesin-related protein, putative, expressed
Lys_grain	12	QEI-sf0828052927	8	-96	LOC_Os08g44430	vesicle-associated membrane protein 727, putative, expressed
Lys_grain	12	QEI-sf0828052927	8	-92	LOC_Os08g44440	multiple myeloma tumor-associated protein 2, putative, expressed
Lys_grain	12	QEI-sf0828052927	8	-89	LOC_Os08g44450	L1P family of ribosomal proteins domain containing protein, expressed
Lys_grain	12	QEI-sf0828052927	8	-87	LOC_Os08g44460	expressed protein
Lys_grain	12	QEI-sf0828052927	8	-84	LOC_Os08g44470	expressed protein
Lys_grain	12	QEI-sf0828052927	8	-80	LOC_Os08g44480	40S ribosomal protein S25, putative, expressed
Lys_grain	12	QEI-sf0828052927	8	-72	LOC_Os08g44490	retrotransposon protein, putative, unclassified
Lys_grain	12	QEI-sf0828052927	8	-66	LOC_Os08g44500	retrotransposon protein, putative, unclassified
Lys_grain	12	QEI-sf0828052927	8	-56	LOC_Os08g44510	UDP-N-acetylglucosamine--peptide N-acetylglucosaminyltransferase SPINDLY, putative, expressed
Lys_grain	12	QEI-sf0828052927	8	-52	LOC_Os08g44520	peptidyl-prolyl cis-trans isomerase, putative, expressed
Lys_grain	12	QEI-sf0828052927	8	-46	LOC_Os08g44530	dihydroxy-acid dehydratase, putative, expressed
Lys_grain	12	QEI-sf0828052927	8	-43	LOC_Os08g44540	expressed protein
Lys_grain	12	QEI-sf0828052927	8	-42	LOC_Os08g44550	expressed protein
Lys_grain	12	QEI-sf0828052927	8	-35	LOC_Os08g44560	expressed protein
Lys_grain	12	QEI-sf0828052927	8	-23	LOC_Os08g44570	retrotransposon protein, putative, unclassified
Lys_grain	12	QEI-sf0828052927	8	-19	LOC_Os08g44580	retrotransposon protein, putative, unclassified
Lys_grain	12	QEI-sf0828052927	8	-10	LOC_Os08g44590	gibberellin 20 oxidase 2, putative, expressed
Lys_grain	12	QEI-sf0828052927	8	-5	LOC_Os08g44600	retrotransposon protein, putative, unclassified
Lys_grain	12	QEI-sf0828052927	8	0	LOC_Os08g44610	hypothetical protein
Lys_grain	12	QEI-sf0828052927	8	3	LOC_Os08g44620	zinc-binding protein, putative, expressed
Lys_grain	12	QEI-sf0828052927	8	13	LOC_Os08g44640	OsSCP41 - Putative Serine Carboxypeptidase homologue, expressed
Lys_grain	12	QEI-sf0828052927	8	19	LOC_Os08g44650	expressed protein
Lys_grain	12	QEI-sf0828052927	8	21	LOC_Os08g44660	EF hand family protein, putative, expressed
Lys_grain	12	QEI-sf0828052927	8	25	LOC_Os08g44670	calreticulin precursor, putative
Lys_grain	12	QEI-sf0828052927	8	27	LOC_Os08g44680	photosystem I reaction center subunit II, chloroplast precursor, putative, expressed
Lys_grain	12	QEI-sf0828052927	8	29	LOC_Os08g44690	transposon protein, putative, Pong sub-class
Lys_grain	12	QEI-sf0828052927	8	33	LOC_Os08g44700	retrotransposon protein, putative, unclassified
Lys_grain	12	QEI-sf0828052927	8	39	LOC_Os08g44710	retrotransposon protein, putative, unclassified
Lys_grain	12	QEI-sf0828052927	8	45	LOC_Os08g44720	retrotransposon protein, putative, unclassified
Lys_grain	12	QEI-sf0828052927	8	55	LOC_Os08g44730	hypothetical protein
Lys_grain	12	QEI-sf0828052927	8	57	LOC_Os08g44740	hypothetical protein
Lys_grain	12	QEI-sf0828052927	8	63	LOC_Os08g44750	auxin-induced protein 5NG4, putative, expressed
Lys_grain	12	QEI-sf0828052927	8	67	LOC_Os08g44760	domain of unknown function DUF966 domain containing protein, expressed
Lys_grain	12	QEI-sf0828052927	8	76	LOC_Os08g44770	copper/zinc superoxide dismutase, putative, expressed
Lys_grain	12	QEI-sf0828052927	8	79	LOC_Os08g44780	expressed protein
Lys_grain	12	QEI-sf0828052927	8	81	LOC_Os08g44790	expansin precursor, putative, expressed
Lys_grain	12	QEI-sf0828052927	8	83	LOC_Os08g44800	hypothetical protein
Lys_grain	12	QEI-sf0828052927	8	85	LOC_Os08g44810	lactate/malate dehydrogenase, putative, expressed
Lys_grain	12	QEI-sf0828052927	8	88	LOC_Os08g44820	no apical meristem protein, putative, expressed
Lys_grain	12	QEI-sf0828052927	8	99	LOC_Os08g44830	ZOS8-14 - C2H2 zinc finger protein, expressed
Lys_grain	12	QEI-sf0828052927	8	107	LOC_Os08g44840	transferase family protein, putative, expressed
Lys_grain	12	QEI-sf0828052927	8	114	LOC_Os08g44850	C2 domain containing protein, putative, expressed
Lys_grain	13	QEI-sf1000817490	10	-113	LOC_Os10g02120	retrotransposon protein, putative, unclassified
Lys_grain	13	QEI-sf1000817490	10	-96	LOC_Os10g02130	retrotransposon protein, putative, unclassified
Lys_grain	13	QEI-sf1000817490	10	-92	LOC_Os10g02140	hypothetical protein
Lys_grain	13	QEI-sf1000817490	10	-82	LOC_Os10g02150	retrotransposon protein, putative, unclassified
Lys_grain	13	QEI-sf1000817490	10	-79	LOC_Os10g02160	retrotransposon protein, putative, unclassified
Lys_grain	13	QEI-sf1000817490	10	-75	LOC_Os10g02170	retrotransposon protein, putative, unclassified
Lys_grain	13	QEI-sf1000817490	10	-66	LOC_Os10g02180	retrotransposon protein, putative, unclassified
Lys_grain	13	QEI-sf1000817490	10	-65	LOC_Os10g02190	retrotransposon protein, putative, unclassified
Lys_grain	13	QEI-sf1000817490	10	-63	LOC_Os10g02200	retrotransposon protein, putative, Ty3-gypsy subclass
Lys_grain	13	QEI-sf1000817490	10	-52	LOC_Os10g02210	peptide transporter PTR2, putative
Lys_grain	13	QEI-sf1000817490	10	-42	LOC_Os10g02220	peptide transporter PTR2, putative, expressed
Lys_grain	13	QEI-sf1000817490	10	-34	LOC_Os10g02230	hypothetical protein
Lys_grain	13	QEI-sf1000817490	10	-27	LOC_Os10g02240	peptide transporter PTR2, putative, expressed
[truncated: 1,360 more rows]

## Sheet: Supplementary Table S6
Supplementary Table S6 | Haplotypes of key candidate genes for lysine accumulation and lysine content in rice.
[truncated: 389 more rows]
